# Supplementary material for: Transcriptome-based analysis of key pathways relating to yield formation stage of foxtail millet under different drought stress conditions
Source: Front Plant Sci. 2023 Feb 3;13:1110910. doi: 10.3389/fpls.2022.1110910 (PMC9937063; doi:10.3389/fpls.2022.1110910)
Supplement: Supplementary file 2 [file DataSheet_2.xlsx]

## Sheet: DEGs.xls
Table S4 Differentially expressed genes
Gene id	Symbol	LD-1	LD-2	LD-3	LDCK-1	LDCK-2	LDCK-3	HD-1	HD-2	HD-3	HDCK-1	HDCK-2	HDCK-3
ncbi_101756966	MSK-3	1.69	1.99	0.74	1.53	2.43	3.99	2.59	1.34	0.41	2.02	1.64	0.51
ncbi_101762773	CHIA	6.55	6.75	6.16	5.26	8.81	11.01	8.84	4.14	4.44	4.97	4.45	4.81
ncbi_101769551	RVE1	0.55	0.76	0.32	0.16	0.63	0.59	0.43	0.24	0.4	0.44	0.25	0.22
ncbi_101780021	--	1.25	1.06	0.4	0.51	1.19	1.32	0.74	0.65	0.6	0.44	0.38	0.54
ncbi_101762617	UGT73C5	2.64	3.19	3.67	2.38	3.79	3.21	3.48	2.63	1.85	2.72	3.36	2.94
ncbi_101782094	--	0.2	0.83	0.37	0.51	0.92	1.08	0.39	0.85	0.45	0.14	0.78	0.69
ncbi_101761093	GSTU6	0	0.88	0.61	0.46	0.68	0.82	0.35	0.22	0.41	0.38	0.39	0.46
ncbi_101781974	gins4	13.02	23.12	20.04	21.35	24.38	26.43	20.26	17.29	19.04	15.95	23.02	19.44
ncbi_101757515	SBT2.5	2.19	1.8	1.31	2.61	2.85	2.75	1.81	0.75	1.65	1.05	1.47	1.76
ncbi_101761496	--	3.16	0.9	0.63	3.42	3.98	3.57	1.93	0.63	0.96	0.91	1.3	2.1
ncbi_19526790	ndhC	6	1.94	5.4	6.64	7.38	9.25	5.28	2.69	3.59	3.58	4.64	2.8
ncbi_101772004	--	1.59	0.55	0.59	1.4	2.32	2.69	1.85	1.06	1.18	0.37	1.18	0.66
ncbi_101764980	GIP2	2.07	1.22	0.58	1.95	2.75	3.65	2.72	0.85	0.43	0.47	0.41	0.46
ncbi_101753069	PAP22	0.9	1.08	0.17	1.87	3.21	4.66	2.11	0.56	0.22	0.24	0.53	0.62
ncbi_101767688	PAF1	2.75	1.91	1.79	3.72	5.6	5.54	4.37	1.67	1.86	1.62	1.96	1.97
ncbi_101772491	--	13.43	11.86	9.37	19.21	32.01	32.48	19.8	7.26	6.69	8.98	7.22	8.06
ncbi_101762944	PVIP	7.75	10.67	7.51	12.56	15.87	14.15	10.35	7.8	8.69	6.7	7.2	10.08
ncbi_101762462	ENDO2	1.42	1.61	1.03	2.53	6.2	4.86	2.3	0.57	0.6	0.39	1.07	0.99
ncbi_101770507	--	1.02	1.56	0.81	3.55	5.75	4.96	2.15	0.88	0.65	0.5	0.41	1.14
ncbi_101761037	MFSD12	19.3	18.95	18.64	29	34.44	35.65	29.28	16.98	22.17	18.01	19.57	19.34
ncbi_19526836	rps7-A	3.81	4.11	4.29	5.17	5.59	5.73	4.98	3.81	4.84	3.95	3.83	4.26
ncbi_19526868	rps7-A	3.81	4.11	4.29	5.17	5.59	5.73	4.98	3.81	4.84	3.95	3.83	4.26
ncbi_101765672	At1g47380	4.8	4.22	4.86	6.18	8.67	7.55	5.49	4.91	5.13	4.7	4.21	4.52
ncbi_101774871	mfsd5	7.65	5.23	7.13	17.39	26.18	21.28	7.97	8.79	10.56	7.55	6.24	6.14
ncbi_101765973	At3g13620	4.57	2.49	2.8	9.09	14.78	11.88	7.52	7.37	6.86	3.67	3.08	3.82
ncbi_111255652	Sb03g046810	7.49	4.74	4.93	13.83	22	17.26	13.02	8.35	7.44	5.97	3.48	4.18
ncbi_101752505	STP14	5.49	5.75	4.74	8.28	17.85	19.19	10.88	6.18	5.02	6.29	6.06	6.9
ncbi_101753132	--	2.47	1.89	1.87	6.09	13.47	13.46	7.72	2.41	1.89	3.49	3.47	5.96
ncbi_101778418	--	63.42	47.24	44.11	80.99	164.12	152.56	92.15	60.09	49.9	58.16	52.3	76.1
ncbi_101777398	creC	10.38	8.95	9.58	12.6	17.2	16.1	13.37	9.81	10.38	10.52	10.97	11.19
ncbi_101785978	SCPL51	6.39	7.22	6.28	12.36	19.92	20.6	13.59	8.79	10.2	10.19	9.86	11.55
ncbi_101760984	PAT08	6.58	4.69	5.17	7.82	12.38	15.77	8.98	7.2	7.59	7.38	7.55	7.05
ncbi_101786692	OTU9	4.12	3.06	4.47	4.7	7.08	7.95	5.61	4.65	4.72	3.51	4.54	4.29
ncbi_101769587	SCL9	16.41	11.59	14.57	31.46	40.45	46.85	25.06	22.03	22.56	27.95	13.91	27.21
ncbi_101772005	BSK3	13.59	13.17	11.1	16.95	22.43	23.07	15.35	14.49	16.39	16.27	16.64	16.16
ncbi_101760253	--	6.58	1.54	3.48	15.76	40.43	47.58	6.79	8.29	6.93	17	11.08	18.95
ncbi_101784391	NHX2	33.21	15.28	14.27	107.67	185.96	202.22	72.78	43.31	34.23	65.7	55.43	54.19
ncbi_101756399	ERF060	62.91	27.71	30.61	143.96	365.44	365.89	98.8	46.75	50.41	89.94	74.88	109.87
ncbi_101763552	--	6.09	4.2	3.26	8.46	13.48	14.01	5.54	5	4.83	7.01	5.51	6.52
ncbi_101777085	--	4.26	4.49	3.4	5	6.52	6.84	3.98	5.53	4.74	5.3	3.1	4.37
ncbi_101783813	Ormdl3	26.65	27.09	25.62	29.51	41.14	38.55	27.11	27.96	30.2	29.24	19.4	24.31
ncbi_19526799	petA	1.43	1.72	1.57	2.9	3.88	4.06	1.03	1.58	2.31	2.08	0.65	1.36
ncbi_101759235	PEX19-1	27.87	26.41	21.37	29.72	32.99	36.02	24.29	26.65	20.84	29.59	22.31	22.78
ncbi_101768281	--	2.18	1.19	1.71	2.61	4.46	3.67	1.59	2.04	1.59	2.26	0.68	1.12
ncbi_101763957	Os01g0192000	3.96	3.43	2.8	7.61	11.36	8.21	1.75	3	2.59	4.08	0.71	2.52
ncbi_101775488	AAP3	33.43	20.9	22.88	47.97	57.28	44.79	24.58	28.25	21.02	27.03	14.02	16.56
ncbi_101760362	At2g19130	0.44	0.42	0.6	0.69	1.42	1.38	0.7	0.58	0.59	0.76	0.71	0.18
ncbi_101757401	PLP1	0.95	0.59	0.76	1.01	1.23	1.45	0.71	0.71	0.93	1.05	0.69	0.51
ncbi_101768423	CBP60B	57.76	49.71	47.54	52.67	71.42	70.92	56.15	51.91	56.36	62.7	49.98	42.15
ncbi_101783409	LHW	25.25	21.95	23.61	31.61	74.2	81.47	32.2	31.09	29.38	13.81	18.49	20.62
ncbi_101762607	NPF8.3	14.17	16.91	17.15	26.23	42.77	59.46	21.47	23.25	20.24	14.75	6.46	10.88
ncbi_101763058	NHL13	3.23	1.23	3.02	4.21	7.36	9.82	2.39	3.66	3.37	0.55	0.66	1.12
ncbi_101754448	BHLH106	1	0.14	0.3	0.55	1.5	1.81	0.56	0.59	0.43	0.32	0.11	0.39
ncbi_101753459	At5g41890	0.44	0.22	0.27	0.37	0.99	1.3	0.28	0.33	0.55	0.28	0.03	0.11
ncbi_101761994	Os05g0497500	8.15	5.73	5.95	6.45	10.68	11.28	6.18	7.01	7.51	6.16	6.18	5.44
ncbi_101765750	Os07g0566200	11.19	10.95	10.32	11.3	16.98	19.31	10.09	8.5	7.28	7.26	6.55	8.22
ncbi_101773828	Os04g0609600	27.17	25.66	24.36	26.5	35.03	34.57	23.17	22.46	21.88	21.71	19.19	22.01
ncbi_101781661	SYT5	22.92	20.25	22	21.2	28.78	29.29	20.69	17.23	18.79	20.35	16.75	16.99
ncbi_101777340	ERF053	83.05	39.34	49.76	67.64	154.82	166.11	43.37	28.02	26.12	34.72	18.38	50.36
ncbi_101786844	TPP9	155.72	65.08	121.32	152.6	359.26	412.96	19.02	28.65	31.6	13.93	8.07	13.1
ncbi_101754884	UBC20	0.75	0.12	0.46	0.75	1.76	1.73	0.2	0.05	0.17	0.06	0	0
ncbi_101761744	BAM3	235.09	135.66	195.17	264.5	497.67	473.4	116.08	107.48	130.21	131	101.5	122.69
ncbi_101777576	ERF057	38.75	15.26	20.23	26.45	66.01	97.82	11.12	15.75	11.87	29.88	15.25	33.15
ncbi_101786451	COL16	0.39	0	0.13	0.24	0.73	1.05	0	0	0.03	0.12	0.06	0.03
ncbi_101767302	CPRF2	11.4	13.55	12.26	9.57	42.42	48.67	3.47	4.47	5.77	12.53	5.13	4.22
ncbi_101765397	NPF6.3	0.94	0.68	0.93	1.66	5.83	6.5	0.21	0.11	0.22	0.08	0.03	0
ncbi_101767769	PUB19	1.65	0.21	0.43	1.63	5.05	6.5	0.08	0.14	0.17	0.05	0.07	0.17
ncbi_101758788	CXE8	8.38	6.08	11.46	11.4	29.83	35.5	4.59	9.33	8.88	3.97	2.55	3.74
ncbi_101766258	20ox2	0.57	1.07	0.66	2.29	4.87	6.45	0.24	0.69	1.19	0.07	0	0.36
ncbi_101756318	--	1.48	1.08	0.95	2.45	5.4	3.17	0.92	1.36	1.5	2.93	0.97	1.85
ncbi_101770761	--	12.87	9.51	9.1	10.48	24.55	17.16	8.23	8.21	8.93	12.83	8.97	13.26
ncbi_101783968	AP2-3	1.42	1.11	0.29	1.77	3.33	1.87	1.35	1	1.19	1.48	0.92	1.26
ncbi_101770741	PXG4	119.15	111.88	80.36	153.8	210.11	181.86	122.39	104.58	97.29	152.45	99.45	119.72
ncbi_101770917	TET4	65.44	52.81	40.11	77.39	119.43	99.55	52.62	60.87	47.09	63.29	48.66	54.68
ncbi_101776673	--	5.12	4.8	3.7	6.54	13.34	8.32	2.93	4.89	3.51	6.08	5.45	5.87
ncbi_101784878	Os02g0245800	4	4.93	5.69	8.14	18.1	10.67	4.27	4.27	4.12	5.91	8.69	6.76
ncbi_101779644	--	11.08	9.04	7.69	12.17	22.24	18.18	10.17	7.45	8.31	9.15	11.33	9.46
ncbi_101784952	DIVARICATA	0.61	0.78	0.42	1.6	4.78	3.82	0.58	0.23	0.06	0.59	0.6	0.41
ncbi_101762943	PK1	0.88	0.69	0.88	2.89	8.73	7.47	0.81	0.67	0.32	1.65	1.81	1.22
ncbi_101782123	DRM1	35.85	21.84	19.51	64.36	189.04	161.96	13.47	20.85	20.9	30.86	23.59	26.29
ncbi_101761884	ATJ11	25.88	13.06	15.36	87.22	145.27	107.07	11.65	8.72	12.85	57.73	34.29	19.12
ncbi_101767148	CIPK17	14.06	11.47	10.58	35.09	56.7	47.41	16.7	13.4	15.58	23.06	19.81	22.13
ncbi_101784979	POB1	20.4	19.52	19.79	25.73	30.25	29.26	19.12	19.85	18.72	21.25	20.77	22.29
ncbi_101767531	--	3.27	1.81	2.83	18.94	38.02	31.62	2.1	1.43	1.13	5.75	1.44	7.07
ncbi_101784905	GTE7	19.92	19.84	14.16	41.43	78.7	61.97	12.77	12.97	10.8	21.47	19.8	21.07
ncbi_101759010	Os07g0684100	0.93	0.61	0.91	7.44	27.1	16.49	0.64	0.95	0.7	0.76	1.4	1.33
ncbi_101781152	PUP11	2.39	3.13	3.24	6.02	16.96	11.98	4.83	3.33	2.96	2.5	2.47	1.68
ncbi_101781800	GER5	0.15	0	0.22	0.28	1.06	0.76	0.23	0.18	0.06	0.07	0	0.06
ncbi_101759538	FLS2	1.31	0.57	1.39	1.91	8.1	5.91	0.71	0.82	0.47	0.14	0.09	0.17
ncbi_101768494	FLZ10	0.2	0	0.2	0.25	1.51	1.02	0	0.1	0	0	0	0
ncbi_101756553	HEC1	1.51	0.14	0.26	0.91	11.65	4.39	0.11	0.34	0.27	0.29	0	0.18
ncbi_101771212	GSVIVT00026920001	0.21	0.03	0.14	0.48	1.89	0.98	0.29	0.28	0.15	0.16	0.33	0.5
ncbi_101785298	CXE15	9.36	0.43	4.52	14.1	43.68	23.51	7.27	8.87	4.43	12.02	6.55	6.11
ncbi_101768564	Os01g0846300	34.1	25.48	18.08	47.59	95.91	58.39	29.33	19.22	14.19	38.95	29.72	25.13
ncbi_101783345	Os03g0743400	125.79	120.92	113.95	134.68	160.33	137.15	126.46	123.96	116.03	126.86	119.25	115.55
ncbi_101761956	--	19.35	19.84	13.6	35.63	88.93	44.03	8.99	13.53	12.44	24.09	6.62	14.86
ncbi_101763047	At1g66480	1.81	1.12	0.45	2.96	6.29	2.43	0.79	0.82	0.87	0.71	0.96	0.81
ncbi_101763904	--	2.37	1.92	1.08	3.27	5.24	3.63	1.82	1.1	0.88	1.65	1.55	1.43
ncbi_101782135	RAP2-9	20.31	17.69	8.23	29.31	55.86	31.36	9.13	4.12	4.69	9.68	7.7	5.94
ncbi_101771447	--	2.71	5.91	3.46	13.2	19.75	12.99	5.24	3.01	3.23	4.82	2.05	2.46
ncbi_101765176	BRG3	0.75	1.28	0.78	3.24	6.05	2.81	0.97	0.78	0.9	1.17	1.17	0.63
ncbi_101768040	AMY1.3	0.11	0.12	0.17	1.29	2.31	1.02	0	0	0.04	0	0	0
ncbi_101756125	--	0.37	0.42	0.52	0.69	1.24	1.11	0.3	0.31	0.22	0.39	0.21	0.44
ncbi_101781956	NAL1	1.96	1.81	2.55	3.92	6.24	5.09	1.1	1.09	1.29	2.22	1.76	3.25
ncbi_101771289	INT2	1.93	1.67	2.01	2.66	5.12	6.03	1.39	0.72	0.59	1.99	1.92	2.67
ncbi_101773997	--	0.81	0.61	0.54	0.96	1.95	1.84	0.82	0.39	0.57	0.79	0.63	1.12
ncbi_101763140	CPK3	17.2	13.87	15.6	18.39	22.87	21.75	17.28	14.59	15.77	17.48	15.82	15.8
ncbi_101771485	--	2.77	1.52	2.41	4.34	7.98	8.71	1.18	2.04	3.65	3.93	2.25	1.91
ncbi_101781439	AHL5	39.43	20.38	26.47	38.02	84.58	75.68	11.18	19.98	29	38.63	23.54	30.06
ncbi_101756977	--	0.14	0.23	0.39	0.81	1.36	0.91	0.18	0.57	0.18	0.13	0.07	0.15
ncbi_101772145	RWA1	13.74	11.57	12.65	17.43	20.47	18.56	11.02	15.54	14.14	12.58	12.35	13.53
ncbi_101763896	DOF5.1	1.69	1.63	1.97	2.99	3.79	3.32	1.52	2.14	2.01	1.75	1.34	2.09
ncbi_101786065	--	9.81	9.61	9.29	13.1	15.42	14.81	8.33	11.26	10.65	8.3	8.72	11
ncbi_101786635	SFH13	11.44	12.35	11.17	17.06	18.96	19.03	10.56	9.14	12.01	9.08	12.38	12.71
ncbi_101755961	PIPC	38.86	41.03	40.84	52.89	56.86	55.51	36.59	36.89	40.14	36.76	37.71	43.48
ncbi_101762332	RDUF1	0.2	0.24	0.21	0.78	1.05	1	0.04	0.1	0.29	0.12	0.12	0.32
ncbi_101752664	BSL1	26.89	30.99	28.25	47.33	53.84	50.21	27.28	25.65	28.15	25.2	29.87	29.05
ncbi_101770113	IPK1	7.3	9.06	8.11	13.76	15.69	13.95	8.38	7.18	8.78	7.58	8.43	9.54
ncbi_101768425	Os02g0134400	12.75	14.46	20.38	38.91	45.92	47.87	18.7	10.11	11.01	9.77	13.75	11.4
ncbi_101771811	UGT709G2	0.21	0.94	0.51	15.96	16.93	17.97	1.13	0.9	0.93	0.83	1.42	0.99
ncbi_101783740	At2g27500	13.13	12.36	11.21	100.5	97.95	112.43	9.66	9.17	10.64	8.57	5.72	7.38
ncbi_101752515	CRK6	0.45	0.21	0.8	4.29	4.17	4.38	0.01	0.04	0.05	0.02	0.02	0.02
ncbi_101774158	CINV1	2.9	2.02	2.67	11.19	10.9	11.86	2.83	1.66	1.81	2.96	2.08	1.59
ncbi_101782952	EZ1	1.05	0.96	1.29	2.46	2.98	2.53	1.05	0.8	1.08	0.69	0.84	0.88
ncbi_101784073	CIN1	55.72	58.53	63.91	182.23	221.11	175.04	48.11	34.49	39.1	17.84	14.87	19.65
ncbi_101781553	SAG20	53.71	24.31	47.87	144.29	168.05	147.48	43.66	37.52	42.74	20.42	18.72	26.91
ncbi_101786322	NAGS1	30.01	25.21	30.51	75.81	80.13	68.31	21.25	26.7	27.19	16.74	19.14	17.24
ncbi_101755485	OsI_26380	10.75	15.36	12.48	52.3	57.8	55.76	7.9	6.39	5.12	6.69	5.83	5.79
ncbi_101775670	ANT18	19.93	24.35	18.56	100.99	111.14	102.4	14.02	9.21	9.53	7.96	4.33	6.4
ncbi_101770047	STLP1	14.23	17.79	15.09	30.81	34.26	30.76	12.57	11.86	13.26	11.52	12.44	12
ncbi_101774233	PRN2	26.79	46.43	25.41	135.85	156.12	146.7	19.61	12	9.66	6.64	13.91	15.05
ncbi_101767454	AHL26	2.27	2.43	1.91	18.74	22.46	19.58	2.3	2.5	2.28	0.57	0.44	1.3
ncbi_101773479	CHX19	6.02	9.42	8.79	48.6	58.59	48.29	6.86	6.52	5.34	2.29	2.65	3.1
ncbi_101768572	--	62.91	103.84	122.86	449.86	473.28	442.1	99.52	78.93	72.88	32.12	23.32	32.09
ncbi_101768616	Os07g0507000	32.28	41.89	40.93	110.34	112.89	99.69	34.88	30.92	29.98	29.6	27.03	31.72
ncbi_101780964	SBT3.5	1.56	1.95	2.96	16.98	17.87	15.92	0.29	0.35	0.17	0.09	0.07	0.13
ncbi_101763139	DGK5	4.67	4.96	5.63	15.4	15.48	14.02	2.08	2.43	2.12	1.52	2.05	2.15
ncbi_101764830	CYP90D2	22.43	13.8	22.02	83.69	99.32	77.92	1.68	5.93	4.66	0.37	0.32	0.69
ncbi_101767084	--	31.96	27.25	34.75	106.13	116.65	115.5	7.21	16	10.31	21.88	13.34	23.15
ncbi_101771844	ERF110	24.42	20.78	18.1	85.79	92.96	100.01	1.71	4.74	1.65	0.93	0.72	0.85
ncbi_101760163	--	31.81	25.06	21.37	40.67	46.42	47.14	17.94	17.7	17.71	16.72	18.09	20.14
ncbi_101754314	LOGL10	34.11	15.8	21.14	47.28	65.46	57.91	4.08	13.18	11.15	19.98	12.72	13.15
ncbi_101769928	COL9	5.2	4.18	4.61	9.19	11.52	12.05	0.92	1.87	2.37	3.35	2.39	2.46
ncbi_101757985	--	126.55	92.14	103.09	190.34	282.45	258.29	33.41	54.54	51.07	60.9	33.86	57.43
ncbi_101770314	MDIS2	5.26	3.31	3.45	7.67	10.7	10.32	1.48	1.37	2.34	2.27	1.36	2.69
ncbi_101758024	--	28.68	23.37	24.58	39.38	43.23	45.86	24.31	21.03	22.29	24.75	22.96	23.11
ncbi_101757320	PK1	0.43	0.15	0.41	0.91	1.46	1.46	0.32	0.17	0.11	0.38	0.24	0.13
ncbi_101774182	SLK2	26.49	22.42	20.54	42.12	58.17	61.49	24.03	20.17	18.86	26.5	21.54	19.26
ncbi_101777971	Os05g0358500	93.63	51.27	53.88	108.47	174.1	148.68	47.21	37.51	36.79	52.01	58.06	49.49
ncbi_101782755	--	27.65	19.74	19.27	33.79	46.2	42.4	17.67	17.17	15.82	20.75	23.24	22.78
ncbi_101755160	ATL40	4.94	4.19	1.94	8.71	12.75	10.89	2.09	1.85	1.57	3.09	3.21	2.51
ncbi_101760093	MKP1	37.69	36.85	27.09	56.38	76.66	73.13	26.46	18.76	14.83	27.96	29.03	27.65
ncbi_101765660	LRX6	0.5	0.3	0.45	0.81	1.83	1.59	0.13	0.4	0.49	0.23	0.27	0.35
ncbi_101768884	PERK13	4.01	3.06	3.88	6.7	13.13	11.51	2.44	3.41	3.43	3.14	3.43	2.76
ncbi_101778945	VP14	19.76	9.41	10.4	21.23	60.46	50.65	2.45	3.64	2.33	3.13	2.2	4.53
ncbi_101786447	SPBC29A10.10c	27.76	25.17	26.96	32.43	59.68	51	18.47	18.79	18.95	17.04	21.36	25.23
ncbi_101764891	NPF8.1	12.47	8.04	9.35	25.73	41.17	38.99	5.3	3.77	4.56	4.87	4.78	3.66
ncbi_101759205	CRF1	2.18	1.16	1.1	5.12	9.87	8.65	0.46	0.6	0.91	0.55	0.17	0.34
ncbi_101775969	At2g27500	45.28	24.98	23.37	94.02	171.42	159.76	11.22	8.61	13.37	1.66	2.57	2.91
ncbi_101754019	E2FA	5.22	4.6	4.18	12.82	19.32	16.73	3.25	2.27	1.85	3.37	3.02	3.34
ncbi_101768264	--	6.64	2.63	4.37	11.77	22.38	18.82	2	0.84	1.18	2.1	1.86	3.91
ncbi_101786869	LYK3	0.38	0.07	0.36	0.77	1.59	1.16	0.05	0	0	0.1	0.02	0
ncbi_101760067	RFS2	28.72	4.11	28.63	51.35	84.78	78.93	4.04	7.08	7.84	5.63	5.08	7.28
ncbi_101765726	TPS9	15.2	8.09	13.34	22.25	35.61	35.1	4.38	3.31	2.83	4.02	3.26	4.91
ncbi_101760846	WRKY69	9.67	8.83	8.23	18.17	27.82	23.53	5.53	7.15	7.52	6.13	2.26	5.85
ncbi_101764755	NIN1	139.52	80.53	127.13	203.63	353.52	319.11	41.22	98.28	96.68	71.43	33.85	75.3
ncbi_101781864	RPK2	25.2	23.63	23.26	30.12	37.2	34.95	21.76	23.03	22.14	19.33	22.35	21.19
ncbi_101783438	--	8.2	8.5	6.59	17.31	24.96	24.5	3.29	5.13	6.78	3.75	4.19	3.83
ncbi_101756493	CPK7	10.61	7.46	7.73	25.02	36.28	33.65	4.42	5.04	6	1.77	2.55	2.73
ncbi_101763045	At2g19130	0.58	0.37	0.47	1.58	2.25	2.24	0	0.15	0.1	0.04	0.02	0
ncbi_101779340	RISBZ5	10.86	2.25	9.75	48.43	97.62	97.3	3.14	3.76	3.68	2.39	3.28	4.41
ncbi_101779456	--	6.41	5.33	4.14	23.42	49.52	45.24	2.92	4.08	5.2	1.79	1.82	2.16
ncbi_101760873	SDH	22.56	24.86	28.76	56.19	104.63	113.59	12.04	10.09	13.79	7.84	6.13	8.12
ncbi_101775534	--	0.65	0.9	0.79	3.81	7.84	8.61	0.37	0.21	0.53	0.08	0	0
ncbi_101780248	pod	0.72	1.73	1.72	7.44	13.39	15.36	0.63	0.86	2.21	0.8	0.1	0.13
ncbi_101765827	VPS60-1	12.84	15.99	18.55	27.63	52.56	46.79	10.78	11.16	20.3	16.2	9.29	14.27
ncbi_101782358	CYP704C1	1.13	1.13	1.21	2.3	5.24	5.28	0.62	0.31	0.89	1.33	0.66	0.68
ncbi_101764560	--	0.31	0.69	0.28	1.84	3.42	2.98	0	0.23	0.48	0.17	0.18	0.47
ncbi_101782395	CRCK1	1.39	1.91	1.37	3.59	4.93	4.51	1.06	1.82	1.24	1.39	1.38	1.96
ncbi_101768522	--	0.45	0.31	0.33	2.52	5.29	4.06	0.09	0.27	0.14	0.15	0.47	0.49
ncbi_101768136	PP2A13	1.28	1.23	1.04	10.72	17.39	13.73	1.72	1.24	1.1	1.39	1.41	1.63
ncbi_101778324	NFD4	3.71	2.64	2.81	29.17	52.85	44.19	2.4	1.89	1.76	1.26	0.93	0.96
ncbi_101766462	BANGLUC	11.5	8.02	6.76	27.43	60.46	45.59	2.19	4.89	3.71	2.12	3.32	2.33
ncbi_101757576	RGA3	0.57	0.88	1.05	3.88	8.31	6.71	0.61	1.04	0.7	0.47	0.22	0.35
ncbi_101764402	GAE6	0.07	0.34	0.03	1.06	2.7	2.31	0	0.11	0.03	0	0.03	0.03
ncbi_101785851	IRL3	11.63	14.83	11.4	13.05	16.48	17.5	14.49	13.07	13.41	14.29	11.99	12.02
ncbi_101764364	At4g24290	26.38	27.5	25.64	30.5	37.17	35.38	31.29	29.66	29.75	29.01	24.6	23.88
ncbi_101771391	PVA13	11.28	11.82	9.25	13.89	20.28	19.23	15.36	14.44	11.95	12.96	10.03	10.49
ncbi_101771473	EFL4	33.78	37.03	27.79	42.06	54.33	46.26	41.41	36.56	35.64	47.12	33.84	34.44
ncbi_101786470	UXT3	14.1	13.18	10.27	15.91	22.78	19.48	17.02	15.93	14.17	17.29	14.03	13.16
ncbi_101753800	RHC1A	6.1	8.06	5.65	8.78	14.89	13.28	10.87	8.23	8.84	10.23	8.74	9.56
ncbi_101771454	NRPB9B	3.94	6.7	4.1	6.06	11.53	8.58	5.95	5.86	6.25	7.3	5.04	6.16
ncbi_101779567	SIRP1	10.88	13.13	14.33	17.28	25.38	17.96	17.4	16.92	16.3	15.04	9.92	14.95
ncbi_105913900	PBL11	0.52	0.69	1.02	1.21	1.65	1.3	1.21	1	1.03	0.62	0.74	1.01
ncbi_101762892	--	15.99	24.7	26.59	31.39	51.77	45.86	24.14	37.73	32.35	26.46	12.91	16.95
ncbi_101770849	RGA3	4.23	3.98	5.59	7.32	12.65	10.83	5.92	11.11	8.8	6.28	5.6	5.66
ncbi_101779124	--	1.35	1.42	1.77	1.67	3.41	2.11	1.94	2.33	1.62	1.78	1.58	1.53
ncbi_101783708	At5g10770	0.19	0.4	0.08	1.05	2.94	1.87	1.19	2.59	0.27	0.04	0.11	0.07
ncbi_101758377	EBF1	39.77	21.01	27.05	25.98	119.63	50.76	50.17	27.61	26.01	33.85	28.13	38.34
ncbi_101769613	--	0.17	0.12	0.06	0.24	1.17	0.25	0.46	0.1	0.11	0.29	0.42	0.27
ncbi_101769654	RBM42	14.2	13.83	11	15.89	25.08	14.56	15.21	14.93	10.97	15.37	14.19	10.93
ncbi_101774359	MADS27	0	0.09	0	0.04	0.47	0.08	0	0	0.04	0.05	0	0
ncbi_101780325	BX9	1.77	1.95	1.29	1.23	8.19	1.07	0.8	0.46	0.28	0.3	0.5	0.31
ncbi_101770933	JJJ1	11.69	9.37	7.37	12.9	15.35	14.85	9.01	11.03	11.31	9.37	10.71	11.28
ncbi_101763405	At2g38640	0.43	0.15	0.11	0.48	1.78	1.31	0.39	0.68	0.41	0.29	0.45	0.45
ncbi_101754426	Os03g0167500	10.34	7.87	6.25	10.69	19.55	16.04	5.34	10.79	10.33	8.17	8.98	9.76
ncbi_101771129	--	3.8	2.71	2.48	3.88	9.75	8.13	1.58	3.07	2.64	2.98	3.29	4.34
ncbi_101764966	DOF5.8	1.38	1.16	0.96	1.64	3.45	2.23	1.07	1.98	1.75	0.58	1.08	1.58
ncbi_101784223	DOF2	6.58	5.2	5.49	8.18	10.75	8.8	5.48	8.33	7.18	6.66	6.24	6.3
ncbi_101784704	Os10g0493600	10.03	6.06	8.94	13.62	21.79	18.29	9.32	14.55	14.32	9.2	10.53	12.97
ncbi_101764057	GAUT11	6.73	5.02	4.69	7.84	14.41	10.26	8.53	10.39	8.08	7.18	7.15	8.05
ncbi_101785810	COG1	16.69	12.77	11.57	17.72	23.69	20.52	16.98	17.99	16.99	16.26	14.63	15.75
ncbi_101758282	--	26.29	16.91	20.73	21.98	43.63	36.38	22.75	31.01	21.64	21.67	14.89	21.18
ncbi_101763540	--	19.93	16.25	16.04	22.32	33.43	25.62	20.73	21.98	18.46	19.43	15.06	17.71
ncbi_101767081	At1g66650	1.17	0.35	0.56	1	3.51	2.34	1.37	1.26	0.97	0.66	0.4	0.52
ncbi_101782531	BASS1	0.74	0.49	0.2	1.05	2.56	0.85	0.51	1.12	0.91	0.8	0.38	0.96
ncbi_101756250	FLZ10	6.16	5.88	6.55	7.75	11.4	6.88	4.81	6.59	6.07	5.11	3.84	5.29
ncbi_101757746	FBW2	8.29	9.72	8.97	12.77	18.34	13.47	7.17	8.72	9.96	9.85	5.41	9.75
ncbi_101780351	RKS1	1.39	2.19	2.6	3.18	6.13	3.93	2.17	2.69	2.65	1.91	1.34	2.68
ncbi_101758082	At1g64760	2.84	3.34	4.25	4.64	7.86	5.47	3.35	3.73	4.49	4.38	3.86	4.3
ncbi_101755695	--	11.07	10.17	8.65	13.47	18.16	14.04	9.58	10.71	11.81	10.38	11.14	10.71
ncbi_101782422	POL	4.14	4.15	3.69	6.03	10	7.04	4.15	5	5.3	4.21	4.61	3.89
ncbi_101754852	NPF2.11	4.45	4	2.85	14.27	33.44	22.72	12.08	8.41	9.19	6.39	11.74	7.48
ncbi_101766086	--	1.5	2.12	1.72	4.2	7.33	6.45	2.39	2.44	3.68	1.87	3.06	2.72
ncbi_101763051	PUP5	0.75	1.2	0.98	1.05	2.92	1.9	0.42	0.87	1.53	0.75	0.64	0.68
ncbi_111258266	WAK2	0.98	0.27	1.76	1.67	6.21	2.74	1.04	1.28	1.62	1.09	0.17	0.39
ncbi_101783369	--	1.26	1.08	1.52	1.87	5.81	3.57	1.77	2.23	3.51	1.47	0.39	0.49
ncbi_101761549	NUDT13	0.57	0.46	0.76	1.02	7.74	4.17	0.93	1.85	2.22	0.96	0.81	0.72
ncbi_101780022	--	1.72	0.5	1	0.88	7.29	4.46	0.48	0.75	3.04	1.37	0.37	0.33
ncbi_101769671	YUC5	0.73	0.55	0.74	1.34	2.35	1.67	0.92	0.66	1.17	1.08	0.47	0.42
ncbi_101781630	STY13	22.68	21.15	21	24.8	30.96	26.35	22.19	23.06	26.02	23.99	18.87	20.32
ncbi_101763292	wdr11	9.4	8.92	8.22	9.69	13.28	11.4	9.66	9.33	10.63	9.08	8.72	8.9
ncbi_101768293	VIL2	20.96	20.01	19.9	23.95	33.32	30.2	23.23	22.66	24.51	23.97	20.82	22.69
ncbi_101752921	--	24.03	23.42	22.5	30.44	29.13	23.21	19.77	19.6	17.72	26.76	22.36	22.76
ncbi_101778749	ATG13B	5.4	4.01	4.96	7.03	7.59	5.43	3.23	3.37	4.09	4.43	4.59	4.78
ncbi_101783143	SRL2	6.16	4.93	5.59	7.48	8.38	6.13	3.3	2.88	2.82	4.67	4.82	4.39
ncbi_101760064	MYB20	0.34	0.3	0.5	0.8	1.3	0.51	0	0	0.12	0.43	0.04	0.04
ncbi_101760048	MYBS3	33.44	28.67	28.26	41.92	47.31	36.51	20.29	28.55	24.08	29.09	25	27.4
ncbi_101759206	SHM4	38.6	49.44	41.83	79.45	89.02	62.94	23.95	32.37	31.13	42.93	35.26	37.04
ncbi_101767812	Os11g0472000	23.53	22.96	25.42	34.17	41.38	34.14	12.7	16.88	15.74	23.7	18.98	22.17
ncbi_101756501	--	52.91	54.1	62.19	78.05	129.79	99.59	66.13	34.84	34.89	59.68	61.69	42.91
ncbi_101783558	CKI1	45.63	45.34	43.66	56.27	71.45	66.71	47.17	33.96	34.4	42.34	45.77	41.73
ncbi_101762071	-	3.02	3.09	4.28	6.17	6.89	6.66	3.51	2.07	2.28	2.9	3.87	3.97
ncbi_101778551	At1g07660	13.89	18.9	14.35	26.38	29.25	25.41	19.44	9.98	9.54	16.38	16.95	16.56
ncbi_101786921	FAAH	4.7	6.27	4.78	9.8	10.99	9.54	4.96	3.7	3.18	5.15	4.64	5.65
ncbi_101754306	--	30.46	34.98	28.39	37.92	40.85	37.53	32.38	27.18	23.66	30.45	33.96	32.79
ncbi_101754701	NAC083	49.58	58.55	30.25	77.75	84.11	61.48	55.15	21.52	17.9	30.61	43.18	43.84
ncbi_101778792	PSK2	24.55	32.08	24.52	48.43	48.93	40.2	45.07	22.2	14.94	26.78	32.15	30.88
ncbi_101783335	OsI_010709	22.28	33.27	26.11	61.45	57.91	48.3	46.73	25.18	17.19	25.9	31.95	30.61
ncbi_101767580	PLDBETA1	9.6	11.25	10.27	14.03	14.01	13.62	13.17	8.73	8.3	10.42	11.93	11.78
ncbi_101775396	At1g07660	41.52	59.97	47.48	95.98	102.5	75.61	79.93	40.95	35.51	68.04	67.24	70.12
ncbi_101777501	GYP7	4.96	9.73	6.51	10.11	12.32	8.65	7.76	6.41	5.68	6.9	8.03	7.5
ncbi_101757988	Rnf5	6.04	8.3	4.23	10.03	11.46	8.98	6.89	5.75	5.8	6.39	6.09	8.13
ncbi_101769998	--	12.72	27.91	14.54	39.97	37.83	31.24	27.47	22.67	20.06	21.71	20.02	22.05
ncbi_101773219	MCCA	19.43	39.73	20.07	32.98	43.23	38.69	17.77	21.57	20.05	26.8	23.35	23.92
ncbi_101753381	RMA1	7.04	9.65	6.77	10.72	10.48	9.79	6.72	6.98	5.68	6.8	6.93	7.68
ncbi_101776091	--	2.72	5.47	1.59	5.49	5.81	5.29	3.5	2.39	1.75	2.28	3.29	2.5
ncbi_101776237	Sb03g046810	0.56	3.76	0.67	3.6	4.14	3.38	1.73	0.67	0.32	0.57	1.05	0.91
ncbi_101758553	FRK1	22.05	25.97	19.45	57.08	57.29	58.24	45.78	32.92	30.12	32.51	26.67	23.5
ncbi_101759162	AMT2-1	28.41	24.95	19.95	95.63	100.37	108.9	77.81	43.57	45.45	48.78	37.12	44.02
ncbi_101776649	GF14E	80.89	79.34	69.91	105.91	104.93	111.59	101.25	94.61	86.36	89.88	85.22	79.61
ncbi_101778730	VAD1	12.52	13.07	12.23	22.34	21.73	24	20.04	17.33	17.06	15.35	16.54	15.15
ncbi_101763069	GCP3	1.9	1.46	1.22	2.97	3.46	2.88	2.28	2.4	1.56	1.85	2.05	1.84
ncbi_101772134	KRP4	3.62	3.94	3.43	8.52	9.23	7.63	5.9	5.71	3	4.73	4.43	4.18
ncbi_101760336	GF14C	146.92	147.96	133.41	243.79	286.77	280.01	188.07	165.25	141.14	166.12	135.89	130.28
ncbi_101773336	Os11g0516000	11.31	10.87	11.12	15.66	17.28	16.39	13.72	12.11	10.38	12.7	10.91	10.89
ncbi_101761689	AE7	18.65	13.5	14.67	34	33.72	35.58	24.96	22.63	20.21	22.34	16.1	21.28
ncbi_101779497	RBSK	2.92	2.06	2.13	6.85	6.82	6.38	4.01	3.29	3.48	4.15	3.19	3.39
ncbi_101767398	TGA2.2	32.89	35.84	32.55	54.39	69.94	64.69	56.65	43.53	37.35	42.01	52.51	50.9
ncbi_101786404	NAC056	1.2	1.48	0.75	5.29	8.12	6	5.28	2.76	2.06	3.48	3.68	4.95
ncbi_101753980	TULP5	0.49	0.15	0.17	0.85	1.5	1.23	0.93	0.52	0.43	0.54	0.9	0.7
ncbi_101782929	--	10.18	8.96	7.55	15.79	21.02	19.22	13.29	13.11	10.81	11.61	14.17	13.42
ncbi_101765527	At2g16250	3.18	2.44	1.84	7.11	7.22	8.42	7.21	2.53	2.14	2.66	6.01	5.31
ncbi_101781920	RNFT2	10.22	9.26	8.22	12.54	15.68	13.46	12.84	8.96	8.98	10.34	11.33	10.77
ncbi_101757294	PAT24	25.4	23.68	20.74	27.38	29.48	27.94	26.77	23.29	22.19	23.07	26.73	25.08
ncbi_101779944	Os07g0607800	45.94	39.82	32.91	61.8	67.24	62.23	53.29	37.17	34.27	36.2	50.01	45.33
ncbi_101774857	DOF4	0.56	0.41	0.39	0.9	0.94	0.88	0.96	0.35	0.26	0.74	0.42	0.41
ncbi_101761934	--	19.01	14.08	15.81	19.51	23.17	20.76	21.65	18.16	15.35	21.01	18.21	18.11
ncbi_101774591	DMT105	0.43	0.4	0.37	0.67	0.82	0.66	0.75	0.43	0.32	0.69	0.55	0.59
ncbi_101779316	TFIIS	48.92	41.51	37.04	58.13	51.76	52.41	47.42	38.77	42.38	48.45	44.49	43.68
ncbi_101754531	Cenpv	0.77	0.47	0.79	1.44	1.39	1.23	1.11	0.57	0.98	1.18	0.86	0.9
ncbi_101772540	NPGR2	5.43	3.35	3.43	6.87	7.62	6.63	6.04	5	5.67	6.97	5.14	5.49
ncbi_101774861	FTIP1	0.64	0.65	0.48	0.85	0.92	1.12	0.49	0.7	0.55	0.75	0.82	0.62
ncbi_101753644	MADS14	57.85	56.78	47.67	63.82	81.98	104.29	50.94	50.87	52.25	80.09	57.91	56
ncbi_101756023	--	8.64	8.45	4.58	10.3	17.7	18.92	8.07	7.63	5.02	9.07	8.38	6.32
ncbi_101766901	MYOB7	8.72	9.72	6.67	11.81	13.35	16.31	10.02	8.76	7.56	11.2	10.76	8.91
ncbi_101768886	SKIP15	3.35	3.65	2	6.59	6.81	7.21	4.07	4.18	4.82	4.85	5.43	3.66
ncbi_101770176	AUL1	3.76	3.52	2.43	6.8	6.58	7.54	3.89	4.52	4.68	3.44	4.57	4.07
ncbi_101786746	At3g55350	0.63	0.95	0.38	2.69	2.81	3.52	1.42	1.27	1.38	0.87	1.45	1.15
ncbi_101784991	DNAJC7	2.78	2.82	2.34	5.17	4.72	5.07	2.27	2.31	3.48	3.28	3.54	3.57
ncbi_111257001	CPK17	10.6	13.04	9.9	16.62	18.4	19.39	12.27	11.63	15.44	13.26	13.9	14.4
ncbi_101763383	TUBA2	31.82	28.35	32.16	45.59	46.11	55.16	30.9	32.78	31.14	41.04	38.45	38.09
ncbi_106804399	NRPB1	20.02	18.01	18.56	34.18	28.63	42.94	18.03	18.68	17.93	25	25.47	23.97
ncbi_101766716	UGT79	0.3	0.17	0.11	1.95	2.14	3.05	0.59	0.21	0.55	0.56	1.14	0.83
ncbi_101768308	--	7.8	5.45	5.66	90.99	70.72	114.04	13.57	13.02	14.94	24.05	36.86	54.66
ncbi_101764088	PROT1	1.4	1.37	1.59	3.32	5.35	5.95	0.93	2.07	2.69	2.69	2.95	2.28
ncbi_101766244	YPQ1	9.95	9.24	9.62	27.87	29.59	43.27	13.29	23.85	23.2	21.89	21.11	17.78
ncbi_101763742	TSO2	1.04	2.26	0.77	3.62	5.23	3.4	1.07	1.4	1.92	3.29	1.89	2.28
ncbi_101786314	--	6.67	6.68	5.64	10	14.93	9.51	6.32	7.55	8.64	9.63	8.88	9.35
ncbi_101765448	--	7.37	7.19	6.44	10.42	11.37	9.49	7.93	8.94	7.27	9.76	7.91	8.57
ncbi_101760052	WAK2	1.05	1.53	0.71	2.95	4.56	3.52	1.67	1.86	1.96	2.35	2.01	1.27
ncbi_101780734	MKRN	5.36	5.74	5.62	11.17	13.28	11.11	7.53	7.46	7.08	8.85	7.39	7.75
ncbi_101756466	B'BETA	9.62	8.71	7.23	12.59	17.23	15.42	9.78	11.18	10.63	12.42	10.95	11.57
ncbi_101775672	D14	31.21	26.8	28.21	67.75	105.36	82.29	43.23	53.18	46.28	57.46	46.15	54.05
ncbi_101767693	At5g49945	37.81	39.08	30.95	50.33	60.03	52.52	39.45	43.17	37.13	43.19	45.03	43.72
ncbi_101780845	KCR1	13.95	14.9	9.27	24.71	29.75	26.68	19.58	20.19	15.58	19.73	18.13	18.21
ncbi_101755851	At1g18250	0.08	0.11	0.06	0.57	1.02	0.88	0	0.23	0.39	0.7	0.33	0.1
ncbi_101764154	--	25.73	26.87	26.19	37.06	39.77	36.64	26.49	30.53	31.46	33.91	30.64	26.71
ncbi_101767794	WRKY46	26.98	25.38	26.14	35.92	45.24	42.05	28.45	34.77	34.43	34.69	29.37	28.25
ncbi_101754199	ILL6	29.35	22.52	22.99	38.53	53.75	43.72	33.16	32.58	33.55	40.79	29.16	23.06
ncbi_101754413	--	2.01	2.37	1.92	4.06	6.07	6.17	3.71	3.46	3.41	4.44	2.97	2.22
ncbi_101759915	CLC-F	3.81	3.44	2.62	3.97	6.01	5.33	3.3	4.02	3.34	4.24	3.94	3.24
ncbi_101775974	FBX6	25.72	24.38	19.63	29.77	35.85	30.29	24.43	24.73	22.79	26.44	26.61	21.98
ncbi_101781074	BETAC-AD	37.17	34.19	30.26	41	44.06	40.18	35.49	36.38	36.87	36.55	35.1	32.81
ncbi_101752923	NAC100	4.26	2.53	2.41	6.05	8.52	6.96	4.45	4.78	5.11	4.29	3.63	3.34
ncbi_101773923	WLIN2A	13.73	10.39	9.57	15.84	23.03	18.99	13.56	12.65	13.04	12.69	11.13	10.97
ncbi_101780862	ANT1	11.61	11.41	8.52	26.96	34.59	27.54	19.04	20.07	15.9	17.09	20.7	10.87
ncbi_101781376	AGD14	17.68	19.55	16.96	27.41	27.45	25.45	20.62	20.96	20.52	20.77	20.41	18.16
ncbi_101757136	At5g15710	0.89	0.9	0.61	1.81	1.85	1.62	0.67	1.04	0.97	1	1.42	0.9
ncbi_101754962	TWN2	37.77	37.38	36.08	53.22	55.71	53.82	36.48	43.21	44.66	39.74	43.42	41.58
ncbi_101758598	Os07g0613300	4.7	4.36	3.14	9.13	10.35	9.07	3.94	4.74	4.91	3.71	5.88	4.9
ncbi_101781548	--	10.73	13.3	15.4	39.42	36.29	36.91	12.19	16.71	25.41	13.24	21.31	14.51
ncbi_101758107	AVP1	91.94	104.18	117.83	202.87	207.04	201.19	99.12	122.84	144.26	152.06	118.89	116.85
ncbi_101762147	TUBA3	110.04	111.01	107.04	227.82	219.84	222.97	111.55	131.91	141.58	131.99	101.46	87.12
ncbi_101770039	ctps	4.21	4.94	4.7	16.5	18.37	16.71	5.15	5.3	7.4	6.05	5.49	3.94
ncbi_101763377	ACR4	2.78	2.29	2.27	13.88	21.34	18.65	7.26	3.68	3.14	5	6.33	5.19
ncbi_101779599	CAMTA3	21.32	15.01	14.62	37.97	49.04	47.69	24.24	23.07	21.85	20.61	25.03	22.22
ncbi_101760290	BAM9	1.45	0.49	0.62	8.91	13.42	13.37	2.77	3.36	5.27	4.02	3.5	3.9
ncbi_101785719	LHW	2.41	2.51	1.55	9.38	11.18	11.48	3.63	3.85	4.38	3.85	5.01	4.54
ncbi_101771374	abhd17c	8.2	8.71	7.61	17.58	20.21	18.63	8.89	12.59	9.32	9.52	10.23	11.19
ncbi_101773920	NAGLU	5.2	5.18	5.73	9.07	9.26	9.13	5.19	6.61	5.08	5.21	5.39	5.93
ncbi_101778707	--	15.15	12.21	10.23	57.41	56.74	59.35	19.42	14.57	16.59	13.72	20.89	28.19
ncbi_101763238	--	192.8	105.26	89.81	379.94	482.11	423.02	166.99	147.99	148.51	141.65	168.25	195.09
ncbi_101758541	TOM1	17.35	16.26	15.65	31.8	38.02	36.67	19.11	20.1	19.14	19.94	19.84	22.15
ncbi_101777895	--	5.68	5.82	4.57	10.35	12.12	12.47	5.62	5.97	5.63	6.12	5.6	6.72
ncbi_101757626	ERF113	1.17	0.65	0.46	2.65	2.38	2.36	0.89	0.56	0.4	1.26	1.11	0.98
ncbi_101758678	STR18	25.72	11.75	9.08	45.21	50.16	49.83	21.2	12.48	10.33	27.43	22.41	30.83
ncbi_101761448	TSJT1	35.14	25.84	34.25	134.72	166.04	164.76	47.19	37.28	19.39	81.58	37.41	83.27
ncbi_101767391	HAK15	13.43	9.85	9.93	19.24	22.83	19.92	11.06	12.03	11.8	15.99	13.33	15.05
ncbi_101786846	UBC22	6.37	4.72	4.2	9.98	11.93	9.72	4.9	4.38	4.29	6.98	5.81	6.96
ncbi_101772719	TCX5	3.12	2.25	3.07	4.22	4.49	4.38	3.55	3.06	2.24	3.3	3.03	3.28
ncbi_101756741	SDP1	5.01	5.75	4.66	9.03	11.31	9.63	6.85	4.12	4.1	5.29	5.17	6.66
ncbi_101780667	CID7	115.37	114.62	106.61	146.97	161.77	155.37	125.48	106.76	97.86	112.37	106.03	115.34
ncbi_101762399	MGP	7.02	5.97	5.07	9.4	13.18	10.88	8.6	5.54	5.68	6.6	6.2	6.84
ncbi_101785147	BRG1	6.92	6.3	5.85	11.87	14.11	12.64	9.37	5.1	6.33	7.61	7.17	7.22
ncbi_101766343	WRKY4	17.94	18.89	16.07	44.14	47.46	44.21	28.77	20.3	16.1	22.23	26.98	26.02
ncbi_101780293	BCE2	15.46	12.34	10.42	49.63	53.24	41.77	26.96	21.18	14.64	16.89	23.59	19.74
ncbi_101768173	PVA12	23.7	18.28	14.78	34.5	38.5	29.35	25.73	19.26	17.05	22.33	23.15	23.93
ncbi_101777479	Dnajb5	14.06	12.89	11.86	19.04	21.96	19.14	14.95	14.05	11.56	15.3	15.99	14.25
ncbi_101753688	PDCL3	39.33	33.02	29.39	49.91	54.78	46.7	31.82	33.51	35.87	35.35	36.94	29.91
ncbi_101766431	CNGC17	36.85	34.42	34.43	41.78	47.3	42.2	33.78	33.95	34.88	36.17	37.36	35.41
ncbi_101769113	RVE1	8.25	1.95	3.99	17.08	23.95	16.96	4.65	2.58	1.98	4.79	5.48	4.38
ncbi_101770216	BCDH	38.45	23.29	25.99	46.4	53.64	47.59	36.16	29.1	25.62	28.47	33.35	30.38
ncbi_106804126	GAE2	5.14	3.19	2.9	8.02	11.37	7.33	4.7	4.63	3.27	3	4.43	4.99
ncbi_101762765	--	1.87	0.9	1.03	4.95	4.79	3.67	1.08	1.79	1.54	1.29	1.51	1.17
ncbi_101767882	TUBB5	6.25	5.27	4.51	17.95	18.05	15.37	4.6	7.14	7.26	6.92	4.55	5.22
ncbi_101772047	--	10.41	5.63	5.62	31.6	35.13	29.81	4.7	4.52	3.81	8.87	6.96	9.65
ncbi_101778485	Os05g0125500	21.82	19.86	19.03	82.64	70.69	61.46	16.76	18.65	13.82	24.21	26.63	32.52
ncbi_101767856	--	20.15	34.18	18.92	99.74	107.98	89.62	25.45	23.24	22.19	30.7	26.07	25.75
ncbi_101774089	UGT88F3	1.58	2.43	1.49	8.31	7.68	6.82	1.38	1.92	1.69	2.18	1.71	1.55
ncbi_101765852	BRG3	0.18	0.07	0.11	1.09	1.16	0.72	0	0.18	0.1	0.18	0	0.13
ncbi_101785204	ERF110	0.52	0.41	0.36	3.76	4.01	2.11	0.21	0.33	0.07	0.49	0.19	0.27
ncbi_101780420	UBI11	848.03	601.69	899.44	1976.91	1627.76	1580.46	955.94	625.46	547.23	1039.23	903.69	812.87
ncbi_101754975	At1g64890	17.96	13.61	14.59	23.9	23.66	22.16	16.87	16.29	12.06	16.81	14.1	13.98
ncbi_101786393	YPTM2	98.92	77.23	70.76	135.81	123.44	117.9	94.56	78.14	77.31	86.12	74.15	74.55
ncbi_101762134	--	19.34	20.31	17.92	35.72	32.14	34.32	19.81	17.47	15.36	21.23	16.15	16.91
ncbi_101769461	-	6.42	7.56	7.51	17.32	16.48	16.51	8.24	6.15	5.4	8.45	5.93	7.17
ncbi_101763424	H2B.5	25.25	26.92	16.05	80.67	72.89	73.48	32.48	15.85	10.52	29.45	34.67	31.62
ncbi_101764484	DIVARICATA	12.82	16.43	10.04	39.35	38.44	36.82	13.62	14.04	11.02	17.25	17.37	18.17
ncbi_101765538	LACS4	13.27	26.73	21.3	77.32	70.72	65.99	32.05	17.66	20.41	17.65	22.19	25.2
ncbi_101777703	--	2.33	3.44	2.08	10.97	10.6	10.76	3.6	3.16	2.04	1.13	1.89	3.2
ncbi_101759632	CPR5	8.07	9.56	7.3	20.16	21.94	20.75	9.42	7.31	6.9	6.79	8.27	9.26
ncbi_101786359	--	59.35	73.36	53.02	204.11	211.38	212.98	73.39	50.55	44.38	56.7	60.99	65.99
ncbi_101762734	AVT6A	5.77	5.05	3.63	18	19.93	23.28	8.27	2.67	1.79	3.53	5.73	7.51
ncbi_101783512	MUB3	15.19	14.38	13.07	25.06	23.88	25.42	13.85	14.54	11.36	10.93	14.54	14.5
ncbi_101753168	CXE15	0.17	0.34	0	1.69	2.62	1.91	0.17	0.77	0.32	0.38	0.27	0.07
ncbi_101780705	Os01g0549400	40.99	43.21	34.94	58.03	62.48	59.55	41.19	42.47	38.54	42.68	41.03	37.9
ncbi_101762064	SPP2	43.22	44.42	43.89	73.72	82.88	75.77	53.69	51.41	45.65	49.62	46.6	36.32
ncbi_101760501	MMT1	50.84	70.08	69.94	121.61	134.38	123.4	73.05	74.43	58.45	69.4	68.55	61.61
ncbi_101786284	MTP1	18.43	17.08	16.68	55.73	65.61	52.69	26.37	22.68	18.96	19.3	17.46	20.24
ncbi_101754220	GF14C	58.75	48.1	44.61	90.85	111.35	102.62	57.44	55.72	49.14	53.21	44.1	54.17
ncbi_101755252	UKL3	15.34	10.6	11.02	31.24	43.54	42.82	14.05	12.89	13.27	12.14	10.63	10.95
ncbi_111255782	--	99.47	69.78	69.32	161	224.78	204	106.83	87.1	83.3	75.58	81.6	85.86
ncbi_101778442	BZIP23	23.02	11.87	12.74	50.57	57.25	61.64	24.29	20.53	20.2	14.42	12.98	14.42
ncbi_101763679	PMI1	7.95	6.69	7.23	21.87	25.58	24.18	11.66	6.82	8.29	6.59	6.31	7.07
ncbi_101757211	AZI1	3.38	1.66	1.43	11.63	13.68	13.92	4.48	2.46	0.61	0.17	0.34	0.75
ncbi_101759464	-	17.95	16.95	16.65	27.64	30.89	29.88	20.84	19.2	16.83	16.47	17.79	17.25
ncbi_101763766	--	6.19	2.51	2.93	13.44	17.52	15.15	3.31	1.78	3.63	1.77	2.63	1.92
ncbi_101756119	E2FA	4.81	3.82	3.52	7.86	9.6	7.93	3.65	3.55	2.8	3.26	2.73	3.22
ncbi_101782014	--	3.32	1.39	0.98	6.26	9.22	7.02	0.63	0.49	0.55	0.48	0.37	0.83
ncbi_101755412	ROD1	4.46	2.5	2.12	8.27	11.06	10.31	1.06	1.17	0.99	1.53	1.65	1.3
ncbi_101783555	DES2	200.74	168.5	123.16	309.94	430.04	382.62	139.42	98.32	90.94	117.63	116.58	99.87
ncbi_101763544	At3g11180	15.65	6.22	9.42	37.9	55.18	44.59	13.19	13.9	5.4	15.46	12.51	5.65
ncbi_101785889	DSP3	6.02	4.56	3.99	10.05	12.07	9.52	5.25	4.65	2.97	4.59	3.96	3.61
ncbi_101758058	GRXC10	0.73	0.08	0.72	0.69	0.84	1.46	0	0	0.86	0	0.34	0
ncbi_101781049	PER54	0.97	0.22	0.74	1.38	1.21	2.24	0.34	1.05	1.71	0.3	0.79	0.43
ncbi_101785827	FMT	47.18	43.6	42.46	43.9	47.66	51.19	40.13	45	46.72	40.1	48.45	45.58
ncbi_101770081	--	1.3	0.77	0.83	1.36	1.51	2.42	0.82	1.03	1.5	1.22	1.79	1.14
ncbi_101781763	DRM1	13.01	1.93	2.43	8.07	10.07	16.67	1.42	2.15	10.7	4.09	9.96	3.26
ncbi_101776198	At3g30340	0.71	0.66	0.67	1.24	1.32	2.29	0.26	1.36	1.08	0.9	1.24	0.46
ncbi_101778423	NAC035	9.26	8.88	9.26	11.18	9.96	12.65	8.26	11.35	10.44	9	9.24	11.05
ncbi_101763818	TET2	4.99	4.56	3.83	5.42	5.19	8.54	1.57	4.55	3.73	3.45	3.96	4.35
ncbi_101781595	--	3.43	3.73	2.31	4.29	3.77	7.12	2.12	2.35	1.89	2.55	2.66	2.93
ncbi_101781991	--	5.84	5.22	3.82	7.22	7.84	10.64	3.84	5.05	3.3	4.43	3.47	5.72
ncbi_101764776	FLZ5	0.27	0.21	0.06	0.87	1.09	2.74	0.18	0.32	0.2	0.64	0.05	1.15
ncbi_101762853	RE2	0	0	0	0.23	0	1.08	0	0	0	0	0	0
ncbi_101786794	--	0	0	0	0	0	1.02	0	0	0	0	0	0
ncbi_101768896	EDL3	1.53	0.9	0.51	1.29	0.79	2.48	0.64	0.62	1.45	0.62	0.63	0.87
ncbi_101786907	--	1.05	0.48	0.32	0.81	0.69	1.77	0.31	0.36	0.51	0.38	0.45	0.75
ncbi_101762620	ABCB1	0.7	0.33	0.73	1.07	1.06	1.69	0.25	0.45	0.91	0.97	0.51	0.61
ncbi_101766852	At3g05675	0.79	0.58	0.51	0.74	0.73	1.3	0.42	0.46	0.79	0.91	0.59	0.62
ncbi_101780257	--	4.73	3.62	4.24	3.9	5.5	7.33	5.35	6.04	4.61	4.56	4.97	5.35
ncbi_101784521	ALG2	2.2	1.72	2.17	2.2	3.66	4.17	2.95	3.67	2.73	2.53	2.99	2.56
ncbi_101773583	--	17.59	15.29	18.55	17.39	19.84	20.63	17.7	19.39	18.14	17.11	18.32	16.71
ncbi_101781542	ACO1	1.25	0.29	1.48	0.7	1.89	3.03	0.55	1.56	0.94	0.33	0.54	0.56
ncbi_101772764	--	0.48	0.74	0.32	0.24	0.86	1.66	0.83	0.77	0.48	0.52	0.38	0.87
ncbi_101781799	At4g22030	0.87	1.66	1.42	0.54	1.29	3.29	1.92	2.1	1.22	1.25	0.24	0.74
ncbi_101785283	PIKM1-TS	29.48	34.45	49.25	26.79	42.43	80.14	43.25	48.13	32.96	24.04	12.19	17.63
ncbi_101773394	ROH1	49.41	40.83	58.07	35.55	73.82	116.28	48.86	78.31	65.72	65.59	26.26	37.15
ncbi_101784607	At4g22030	1.44	1.86	3.05	0.74	5.85	9.67	2.48	3.98	1.34	2.59	0.88	1.56
ncbi_101755098	CRK15	0.44	0.6	0.34	0.53	0.94	1.66	0.78	1.01	0.58	1.28	0.39	0.41
ncbi_101766666	--	0.19	0.49	0.04	0.94	0.79	1.56	1.03	0.97	0.82	0.89	0.2	0.36
ncbi_101766474	CYCA3-2	1.24	1	0.54	0.94	1.47	1.63	1.03	1.47	1.09	0.86	0.94	0.64
ncbi_101765857	--	0.5	0.17	0	0.19	0.67	1.09	0.52	0.45	0.42	0.4	0.41	0.21
ncbi_101772056	EXO70B1	9.67	9.91	7.29	9.29	10.88	14.93	11.36	10.51	9.7	9.14	10.33	8.16
ncbi_101779739	PPL1	35.13	42.07	38.04	44.36	60	40.78	24.27	35.32	32.1	39.48	37.22	35.07
ncbi_101763299	--	10.72	7.8	11.84	12.26	19.43	14.36	4.2	7.72	9.26	11.01	9.97	7.85
ncbi_111256088	--	7.35	7.04	7.78	8.22	9.25	7.82	5.56	6.57	7.1	7.04	7.91	7.06
ncbi_101761212	VIII-A	48.46	52.84	56.78	56.25	61.87	57.37	43.35	45.81	55.13	48.77	53.11	50.9
ncbi_101763736	CYP37	16.61	17.06	21.65	18.56	26.81	19.91	6.82	12.85	16.62	18.59	17.27	20.07
ncbi_19526781	psaA	11.4	10.45	11.95	11.54	14.81	10.89	7.51	8.75	10.31	8.81	9.97	11.35
ncbi_101760697	CCR1	15.4	17.21	14.4	15.7	19.87	19.58	6.53	9.4	10.3	17.76	15.77	15.28
ncbi_101760474	MNR1	25.34	24.46	29	28.85	39.2	34.13	4.99	12.46	14.5	30.34	25.71	32.04
ncbi_101773341	PDE338	17.93	17.66	16.99	18.67	22.97	21.92	7.54	12.93	12.79	19.15	17.94	18.84
ncbi_101766310	MAP1B	22.23	19.51	15.68	20.92	27.29	23	7.91	11.38	12.2	19.67	21.27	19.71
ncbi_101759626	TPS7	24.9	18.17	20.49	25.28	31.04	29	11.94	14.62	17.79	22.85	23.4	23.82
ncbi_101766516	FRS5	5.95	4.24	5.03	6.97	10.07	9.22	0.77	2.26	2.61	5.78	5.45	5.54
ncbi_101760005	NFYC2	7.08	8.03	10.06	10.03	17.78	13.84	1.9	5.34	8.55	12.9	6.02	9.37
ncbi_101765813	GSTF11	15.08	13.98	15.3	13.81	18.58	18.46	8.82	12.23	14.79	17.49	13.4	14.27
ncbi_101759553	--	1.61	1.87	1.98	2.46	3.76	3.76	0.62	0.67	1.38	2.88	1.56	1.59
ncbi_101784571	MGLL	12.74	13.53	16.66	22.57	27.03	28.12	4.87	8.65	7.96	20.85	13.01	8.95
ncbi_101763534	TIC62	11.74	15.82	18.69	17.02	24.14	19.18	4.32	8.25	11.81	15.17	11.62	12.41
ncbi_101772218	PNSB3	13.02	17.11	18.68	18.65	22.24	20.55	3.28	5.14	9.78	19.79	14.32	10.72
ncbi_101754118	ABCB2	0.79	0.86	0.44	0.46	0.82	0.8	0.23	0.43	0.31	0.5	0.55	0.56
ncbi_101766392	Os02g0104700	30.52	28.61	22.85	27.87	31.93	29.84	14.1	17.61	20.34	27.05	22.02	25.32
ncbi_101768943	EMB1270	4.64	5.25	4.01	3.3	5.78	5.62	0.91	1.62	2.17	3.65	2.05	2.84
ncbi_101778915	VIP2	12.8	15.35	11.69	12.58	13.77	16.3	5.17	5.57	6.73	10.09	8.27	8.17
ncbi_101782932	VPS33	38.68	40.79	34.75	34.93	45.48	38.37	32.51	28.72	29.8	30.66	34.53	31.15
ncbi_101753560	I-2	30.13	26.53	25.68	24.18	32.03	28.62	24.59	22.61	19.78	22.03	23.29	22.3
ncbi_101779477	BRF1	39.76	37.65	37.15	34.55	40.15	37.72	32.68	29.77	28.95	30.87	30.71	31.98
ncbi_101770046	HESO1	3.32	2.93	2.44	2.34	3.62	2.81	1.45	1.52	1.64	2.9	2.4	1.52
ncbi_101778294	TULP12	32.82	29.6	27.76	31.21	38.16	32.88	28.26	23.95	21.49	31.26	28.61	29.09
ncbi_101765437	DRP3A	38.6	36	39.45	34.3	40.84	45.54	29.67	29.08	29.47	31.62	37.27	32.05
ncbi_101767266	DCL4	7.3	6.33	7.72	6.26	8.1	8.81	4.42	4.89	5.56	5.37	7.29	6.29
ncbi_101755728	SPBC2A9.03	63.59	58.95	63.74	62.13	73.55	69.01	44.62	47.47	49.97	58.8	58.33	57.8
ncbi_101780034	IDD5	19.65	16.36	17.55	16.77	22.79	23.02	11.61	13.19	12.37	17.33	16.01	15.42
ncbi_101765653	RGA1	5.01	4.78	3.85	4.16	5.84	5.29	2.7	3.39	3.17	3.56	4.27	3.86
ncbi_101777112	PTM	18.68	18.11	16.52	17.13	23.83	21.87	13.11	12.35	13.39	14.91	18.4	17.48
ncbi_101756806	TPP6	3.92	2.98	3.01	3.85	3.94	5.4	0.96	1.12	1.1	3.15	3.12	1.52
ncbi_101762403	--	5.94	2.22	2.28	5.43	6.9	11.32	0.06	0.5	0.14	4.83	8.37	2.31
ncbi_101765314	BBD2	28.56	25.61	30.19	35.94	42.16	46.88	19.07	21.68	26.99	31.4	30.46	29.14
ncbi_101781370	ALE2	2.41	2.84	2.68	3.04	4.07	5.34	1.29	1.79	2.24	2.49	2.82	2.41
ncbi_101753909	UPL7	8.11	7.47	7.07	7.83	10.54	10.1	6.6	5.47	7.33	6.67	8.29	7.41
ncbi_101783634	--	1.31	0.78	0.87	0.92	1.73	2	0.56	0.52	1.06	0.66	1.08	0.57
ncbi_111256292	--	1.11	0.32	0.43	1.32	1.33	1.87	0.36	0.28	0.3	1.05	0.25	0.73
ncbi_101759086	STR18	1.32	0.61	0.52	1.66	1.25	1.73	0.46	0.31	0.17	0.67	0.76	0.88
ncbi_101778130	BAMY2	457.6	318.99	381.32	585.8	569.13	634.38	303.66	222.19	286.24	405.4	340.3	423.81
ncbi_101781515	--	14.94	8.52	11.67	19.83	23.77	26.89	9.45	3.81	3.97	12.01	10.84	18.33
ncbi_101753433	ARP1	14.83	15.6	9.46	20.21	20.01	24.53	9.23	2.03	1.38	3.59	5.78	6.34
ncbi_101784602	MPPbeta	24.86	26.59	22.59	26.43	29.09	30.57	21.16	20.24	17.57	21.82	19.55	19.76
ncbi_101761365	NAC021	62.4	54.9	33.95	60.05	75.6	83.75	52.94	28.54	23.34	45.9	49.77	44.59
ncbi_101786770	TLP1	7.6	6.78	5.3	7	7.73	8.32	5.87	3.34	4.46	5.11	4.85	5.32
ncbi_101776285	RBP47	23.44	33.7	30.58	36.76	43.61	51.76	12.35	12.65	13.81	23.48	15.28	23.67
ncbi_101767132	B120	16.09	17.06	16.97	19.58	24.32	26.53	7.86	11.19	12.38	14.32	12.48	11.67
ncbi_101771847	--	10.71	11.3	10.02	13.44	16.89	20.54	2.24	3.34	5.66	9.02	5.82	7.58
ncbi_101765047	CCDC130	78.37	85.06	74.85	93.96	100.32	97.3	58.71	56.4	55.92	74.31	76.81	64.23
ncbi_101762534	Os05g0134200	70.75	64.94	57.03	84.06	84.64	101.95	45.61	35.96	36.85	50.51	50.9	53.47
ncbi_101775092	At2g16365	27.72	26.92	23.89	32.58	38.79	44.39	11.27	9.61	11.46	20.76	20.92	21.01
ncbi_101764498	--	1.83	2.05	1.2	2.41	4.24	3.88	1.09	1	1.31	2.22	1.43	1.79
ncbi_101771554	BRG3	7.21	8.94	6.84	14.35	18.19	15.26	3.17	4.33	6.44	11.92	6.58	8.65
ncbi_101759034	--	3.19	4.33	2.13	9.14	10.16	9.82	2.26	2.29	1.97	5.24	3.5	2.69
ncbi_101783306	RFI2	38.43	44.06	38.97	51.19	52.36	52.61	37.78	37.52	36.08	46.06	42.52	39.21
ncbi_101761643	POB1	27.64	34.9	29.4	34.33	40.86	37.94	26.02	25.03	24.8	29.41	27.8	26.62
ncbi_101765063	Os02g0774100	4.82	6.27	4.84	7.31	11.11	7.79	3.61	2.22	2.75	6.4	4.33	3.81
ncbi_101755552	ADCS	6.12	9.79	6.94	11.21	13.43	11.89	6.2	4.73	4.71	6.26	7.87	6.87
ncbi_101772182	CBSCBSPB3	5.02	7.03	5.73	8.37	9.95	9.28	4.11	4.29	4.49	4.23	5.24	5.4
ncbi_101763020	OsI_27673	59.49	62.56	49.78	66.23	73.79	67.18	47.86	48.24	50.12	50.61	57.91	55.02
ncbi_101785709	Rv0183	19.13	19.88	17.4	22.73	27.37	24.59	16.35	14.7	13.87	13.41	18.6	17.67
ncbi_101765666	CAMTA3	63.24	68.18	63.12	74.16	83.09	77.14	54.58	64.43	62.09	60.23	63.13	61.45
ncbi_101770461	BAK1	3.65	3.61	3.53	5.45	5.45	5.98	2.1	2.97	3.24	2.72	3.59	3.6
ncbi_19526757	psbC	18.09	22.33	21.42	36.19	35.57	36.61	12.88	17.4	16.49	17.57	25.95	23.21
ncbi_101762799	ALDH3H1	107.06	179.29	115.01	216.81	167.82	212.8	79.95	62.41	43.95	84.72	118.39	106.77
ncbi_101781410	At5g55050	0.72	0.99	0.6	1.69	1.35	2.12	0.05	0.37	0.12	0.52	0.7	0.51
ncbi_101763804	--	7.99	11.06	5.8	11.09	11.34	13.67	5.62	6.32	6.02	7.27	9.17	9.83
ncbi_101768471	At5g22580	1.85	2.46	1.15	2.16	2.79	2.78	0.18	1.22	0.76	1.16	1.68	2.1
ncbi_101759405	SAUR71	5.67	6.57	6.33	3.89	10.29	7.35	4.48	2.22	2.24	1.1	0.65	1.05
ncbi_101765371	RF45	10.69	10.99	11.05	10.05	17.29	12.82	7.16	7.17	8.6	5.03	8.09	7.44
ncbi_101765607	MNB1A	1.55	1.92	1.5	1	2.32	1.93	0.79	1.22	0.93	0.83	0.58	1.15
ncbi_101781643	--	0.51	0.71	0.46	0.58	1.41	0.86	0.32	0.25	0.39	0.28	0	0.39
ncbi_101767534	SD18	0.93	1.04	1.14	0.93	1.73	1.69	0.32	0.64	0.76	0.68	0.29	0.63
ncbi_101761612	G6PD	8.54	6.57	6.92	7	13.35	11.42	2.54	3.92	5.15	3.25	2.28	3.45
ncbi_101779099	--	25.93	24.73	26.16	21.55	39.86	32.68	17.84	16.73	23.52	19.11	16.32	19.86
ncbi_101752934	CML36	16.42	17.25	19.08	15.48	29.92	25.68	13.84	16.24	10.53	5.83	5.29	6.55
ncbi_101760401	AATP1	25.28	16.76	33.41	20.47	50.34	40.67	21.34	25.86	18.35	13.66	5.72	7.24
ncbi_101760764	CBP60B	35.25	36.47	39.87	36.52	45.53	43.11	36.08	35.68	38.89	32.88	27.48	30.13
ncbi_101753766	CRK15	15.55	11.84	19.44	13.12	25.97	26.51	12	14.77	16.45	8.8	5.07	5.6
ncbi_101765370	RGA5	6.42	5.49	8.31	5.72	10.76	10.13	3.98	6.1	6.13	1.81	1.48	0.64
ncbi_101757717	MYB87	11.51	10.78	10.32	10.19	18.71	18.24	5.66	8.75	10.16	2.96	1.62	2.64
ncbi_101772048	WRKY70	21.58	24.95	23.61	25.42	43.06	37.4	13.08	22.03	28.28	6.6	3.07	4.61
ncbi_101776959	CYP99A2	37.76	39.07	28.72	30.88	61.41	46.44	16.51	26.24	29.34	10.82	3.16	2.83
ncbi_101779338	At5g45370	16.9	16.8	15.53	15.16	20.02	18.03	12.9	14.35	16.62	13.88	11.46	12.29
ncbi_101779653	At5g01750	1.79	2.16	3.04	2.17	3.14	3.43	0.41	0.52	1.78	0.24	0.06	0
ncbi_101785621	SFH8	179.1	167.47	189.51	166.6	202.9	210.31	127.34	123.67	161.87	141.15	117.98	117.82
ncbi_101763075	At1g56140	0.78	0.88	1.04	0.99	2.02	1.46	0.45	0.26	0.79	0.3	0.19	0.17
ncbi_101771376	PSI1	43.61	45.3	54.51	44.52	66.86	64.96	25.75	27.84	36.36	24.09	20.17	22.3
ncbi_101778238	SEC3A	45.37	47.77	50.47	50.22	57.77	55.32	38.33	41.15	44.02	35.69	37.14	35.48
ncbi_101778595	LECRK1	2.33	2.47	3.6	3.43	5.75	2.93	2.86	2.62	2.3	2.56	1.47	1.96
ncbi_101780498	WAK2	3.89	8.05	8.76	6.49	19.01	7.69	5.42	4.6	4.5	4.12	0.95	1.5
ncbi_101762224	AHL	3.33	3.31	4.59	3.5	6.06	4.52	2.81	3.02	2.65	2.88	3.25	3.22
ncbi_101786003	CML32	0.99	0.3	1.14	0.41	2.34	0.79	0.11	0.04	0.05	0	0	0
ncbi_101762682	JMT	0.35	0.2	0.61	0.47	2.25	0.63	0	0.07	0.22	0	0	0
ncbi_101776223	--	14.98	7.31	25.75	19.25	55.89	26.68	0.65	3.47	6.03	0.08	0.13	0.15
ncbi_101782982	BOR4	13.43	7.37	16.58	10.18	19.57	14.89	5.23	12.71	6.92	6.03	6.28	1.43
ncbi_101770018	--	14.24	9.65	15.17	11.96	16.81	13.39	10.68	13.1	11.75	11.89	9.69	11.43
ncbi_101775122	WRAP73	2.79	1.68	2.78	2.53	3.88	2.67	1.61	2.78	2.28	2.1	1.09	1.39
ncbi_101775907	At1g11330	1.5	1.21	1.83	1.62	2.3	2.25	1.01	1.13	1.2	1.08	0.96	0.61
ncbi_101776076	dnaja1	275.43	154.33	231.4	277.54	449.09	454.5	164.82	171.05	194.91	137.55	67.4	121.31
ncbi_101786748	NPF8.1	12.14	6.38	14.36	10.5	24.03	26.73	2.14	4.18	8.38	1.12	0.38	0.14
ncbi_101772166	--	43.93	19.69	39.06	33.92	90.04	89.43	18.33	18.82	18.44	5.93	3.77	4.04
ncbi_105915038	--	3.22	2.11	3.98	2.58	8.72	9.45	0.58	1.32	1.43	0.44	0.16	0.54
ncbi_101774015	RGA1	0.3	0.05	0.34	0.62	1.13	0.83	0.06	0.2	0.24	0.08	0.18	0.05
ncbi_101782870	GAUT9	0.71	0.16	0.63	0.72	1.93	1.46	0.18	0.2	0.42	0.1	0.1	0.15
ncbi_101761359	HAK25	6.26	4.52	8.54	7.79	14.95	14.08	5.89	7.61	6.28	5.7	5.12	4.45
ncbi_101773437	REM4.1	178.63	98.28	151.04	175.05	397.73	383.97	146.02	129.36	142.65	83.77	57.98	61.6
ncbi_101784381	NPF4.6	2.2	1.29	2.11	2.22	4.89	4.02	2.15	1.44	1.68	1.59	1.07	0.74
ncbi_101756699	--	16.93	15.23	18.14	19.55	23.4	20.37	15.41	17.8	16.66	14.09	16.25	14.25
ncbi_101768980	HD3A	12.9	10.34	15.67	17.62	24.96	23.74	11.33	12.39	13.37	7.23	10.02	9.08
ncbi_101781483	PIX13	19.95	7.84	22.3	24.35	35.07	30.43	9.57	14.95	16.54	7.27	7.49	7.71
ncbi_101762663	EG1	1.44	0.81	1.1	0.75	3.28	2.3	0.72	1.42	1.21	0.11	0.18	0.61
ncbi_101764043	DDB_G0281937	1.11	0.45	1.21	1.11	2.15	1.86	0.64	1.13	0.89	0.28	0.17	0.67
ncbi_101761392	OFUT23	3.1	3.05	3.86	3.82	4.64	3.87	2.23	3.18	2.47	2.5	3.32	4
ncbi_101778216	DRTS	12.86	12.5	14.1	13.04	16.65	14.88	11.74	11.93	11.15	8.07	12.48	15
ncbi_101756824	DUS2	40.14	39.22	38.14	42.46	43.76	42.7	34.8	39.23	34.99	28.06	36.14	36.8
ncbi_101775682	--	5.99	6.43	5.91	5.94	7.12	6.52	5.03	5.35	5.22	4.43	5.29	6.06
ncbi_101784930	--	3.6	3.72	2.9	3.22	4.55	3.45	1.58	2.23	2.14	1.19	2.41	3.01
ncbi_101784985	SMC5	8.2	8.07	7.79	9.06	9.26	8.39	7.43	6.13	7.42	7.33	8.31	7.86
ncbi_101777558	RXW8	28.56	29.49	25.28	33.96	39.63	30.99	19.62	21.57	21.83	22.44	28.5	30.64
ncbi_19526780	psaB	12.64	11.69	12.9	14.83	19.53	13.41	5.4	7.7	8.49	8.95	11.44	12.28
ncbi_101761965	ECT4	5.33	5.51	6.85	8.86	11.9	8.36	3.62	3.69	4.04	3.92	5.77	4.92
ncbi_101773166	HD16	43.69	47.18	43.2	56.33	65.56	58.08	34.7	31.4	42.6	42.6	45.53	45.26
ncbi_101756596	--	15.99	17.13	14.7	23	19.06	18.07	11.24	10.94	11.41	10.59	13.81	16.59
ncbi_101757011	CDKF-3	13.82	13.82	14.57	20.39	19.42	19.49	10.04	9.61	9.2	8.76	9.18	14.91
ncbi_101769391	RPA1A	9.41	9.41	10.28	11.51	11.45	10.77	7.81	6.94	7.39	7.07	7.56	9.96
ncbi_101768019	UBP12	23.27	20.03	22.68	27.53	26.05	24.84	16.77	19.31	21.15	17.43	22.03	21.03
ncbi_101774906	XI-B	16.57	16.09	16.6	19.79	20.51	20.73	13.81	14.09	16	12.96	17.13	14.14
ncbi_19526776	atpA	33.43	40.84	38.77	49.27	50.8	48.1	16.29	23.39	37.94	22.21	27.27	26.63
ncbi_101774449	IDM1	8.2	8.29	8.69	10.1	11.91	11.21	5.3	6.35	7.05	6.54	7.55	6.78
ncbi_101778129	LPEAT2	40.47	40.23	38.67	48.68	53.17	47.29	24.06	28.87	31.11	29.6	29.13	24.52
ncbi_101765641	HXK5	33.4	32.75	35.6	39.14	50.67	40.8	18.2	21.09	23.72	24.33	24.06	22.33
ncbi_101776596	4CLL7	8.15	7.48	7.2	9.8	13.31	9.21	1.52	3.93	4.14	3.98	4.28	3.52
ncbi_101765960	SGR6	20.72	19.95	18.38	23.76	27.5	26.67	8.38	11.5	11.73	10.12	11.04	10.57
ncbi_19526788	ndhJ	12.82	11.13	10.66	18.19	18.58	18.66	1.65	7.27	5.09	3.81	5.52	5.02
ncbi_101772174	HD16	60.68	51.28	52.47	80	78.36	71.12	29.56	34.55	43.84	42.08	41.88	43.96
ncbi_101786062	SNL3	75.15	75.37	79.51	98.28	99.14	96.45	42.59	48.93	57.52	57.42	63.83	62.98
ncbi_101758970	CSTLP5	8.96	10.97	7.11	10.34	15.35	10.74	8.32	8.93	9.4	6.09	7.35	7.01
ncbi_101769424	RS2Z33	0.75	0.42	0.1	0.5	1.02	0.37	0.21	0.41	0.17	0.05	0.05	0.13
ncbi_101782946	COR27	1.69	1.29	0.27	1.2	2.02	1.55	0.69	0.44	0.73	0.29	0	0.23
ncbi_101779098	SNX1	41.3	33.95	33.25	36.57	48.95	42.42	37.22	37.26	34.79	33.93	33.07	31.7
ncbi_101766116	At1g80120	11.11	6.61	7.18	8.96	25.98	18.02	4.96	6.96	8.15	3.64	2.43	2.57
ncbi_101755582	At1g01540	7.12	3.42	4.34	5.03	14.06	8.98	2.27	2.98	5.05	2.33	1.19	1.44
ncbi_101769751	CSLA3	2.35	1.26	1.09	1.48	5.32	3	0.44	1.06	1.74	0.56	0.29	0.49
ncbi_101766772	--	9.35	5.79	4.03	11.47	24.41	14.42	5.19	4.09	5.53	5.96	1.73	3.52
ncbi_101780970	Os02g0471500	27.54	22.09	18.02	31.43	50.3	38.85	19.75	24.41	24.47	22.18	18.93	18.34
ncbi_101763733	--	1.39	0.73	0.48	1.15	2.1	1.27	1.27	0.64	0.99	0.57	0.86	0.72
ncbi_101763349	--	1.35	0.65	1.2	1.22	3.16	1.77	1.31	0.81	0.64	0.19	0.48	0.42
ncbi_101768511	SCL7	1.95	1.55	1.19	1.56	3.63	1.96	1.88	1.25	1.77	0.49	0.96	0.83
ncbi_101756364	RLCK185	25.13	17.27	17.9	23.42	33.12	26.44	19.41	15.56	13.68	16.29	18.01	19.9
ncbi_101776447	--	20.22	5.09	11.81	18.71	39.46	33.47	2.82	5.3	3.17	7.03	3.89	15.15
ncbi_101753430	--	17.85	7.13	7.21	27.47	53.16	41.43	9.49	5	5.49	9.13	7.2	19.84
ncbi_101780340	COL9	4.1	1.79	2.63	4.81	8.92	6.05	2.01	1.78	1.58	1.69	2.14	3.28
ncbi_101760141	PCMP-H27	1.55	1.17	0.66	1.61	3.08	1.85	0.63	0.78	0.56	1.02	1.04	1.23
ncbi_101760572	TIF34	32.28	30.69	27.68	31.37	37.26	32.54	26.62	28.22	29.01	29.92	30.52	31.33
ncbi_101767991	CGA1	53.64	20.75	26.61	41.96	62.14	53.67	11.04	13.3	18.3	26.42	42.29	30.65
ncbi_101782436	ZIP10	5.53	1.94	2.72	4.81	8.57	6.02	3.02	1.56	2.84	4.04	5.14	3.93
ncbi_101752739	ATL1	5.67	2.19	2.85	4.04	5.15	4.85	2.68	3.04	4.3	2.24	2.79	2.83
ncbi_101784142	RGA3	0.91	0	0.28	0.67	0.89	0.63	0.05	0.5	0.47	0.16	0.51	0.33
ncbi_101763261	DTX16	1.84	1.26	1.39	1.59	2.48	1.72	0.99	1.03	1.91	1.3	1.42	1.23
ncbi_101769543	CAMTA4	37.51	29.58	33.29	31.08	47.97	43.11	24.03	31.53	37.11	30.91	33.79	29.56
ncbi_105913460	At3g47570	0.83	0.39	0.79	0.82	1.43	1.12	0.29	0.68	0.99	0.54	0.69	0.32
ncbi_101780851	AHL17	7.21	2.8	4.94	5.74	8.74	7.8	2.3	4.3	6.06	3.22	2.99	2.82
ncbi_101782851	Rca	6.62	3.43	5.81	5.04	8.35	6.85	3.08	4.72	5.91	4.66	4.37	4.86
ncbi_101774876	--	1.16	1.71	1.82	3.15	2.5	3.51	0	1.38	1.28	1.73	0.76	0.6
ncbi_105913527	-	2.66	2.96	2.75	4.01	4.7	5.56	0.72	1.29	2.17	2.28	1.13	0.58
ncbi_101774133	rangrf	13.49	14.25	15.23	22.5	18.81	21.6	8.45	11	10.7	12.11	10.74	13.58
ncbi_101756773	IAA4	14.4	19.82	19.27	31.83	24.96	30.42	3	8.34	9.8	14.57	8.8	8.69
ncbi_101773535	--	95.64	100.84	104.5	145.65	137.64	134.03	48.87	71.2	77.4	81.7	60.6	70.99
ncbi_19526851	ndhD	9.99	14.35	12.41	22.46	22.1	18.66	4.02	8.84	10.73	9.04	10.25	8.97
ncbi_101770292	--	5.47	5.36	4.18	7.92	7.59	7.23	1.82	4.12	3.61	3.5	3.99	3.67
ncbi_101759124	DCTPP1	4.38	5.3	3.32	9.49	8.54	8.3	1.16	2.84	3.44	3.18	2.35	2.16
ncbi_19526789	ndhK	17.91	19.17	16.5	36.29	32.16	30.66	5.4	10.65	13.08	8.38	11.85	8.59
ncbi_101752546	SKP2A	28.86	30.27	30.97	67.55	55.33	69.17	21.51	21.15	21.67	28.8	27.89	34.7
ncbi_101773560	MRF1	9.99	13.59	14.82	34.94	29.28	33.95	6.9	10.47	9.49	14.8	13.78	16.34
ncbi_101775245	LRX6	2.69	5.63	8.77	20.23	15.13	16.94	0.66	2.2	1.72	1.46	1.38	1.83
ncbi_101786119	MICU	13.29	16.85	21.8	38.32	31.3	32.84	13.55	14.18	15.88	15.83	16	17.35
ncbi_101765888	Zadh2	57.57	46.04	54.05	90.97	97.03	83.88	38.62	40.31	38.69	39.15	48.07	43.4
ncbi_101769237	LON1	68.09	64.12	59.83	102.53	112.39	94.6	53.66	45.82	49.47	51.48	58.44	54.33
ncbi_101756711	E2FA	6.89	5.67	4.65	14.09	14.12	13.37	3.37	3.8	3.26	3.41	4.51	3.82
ncbi_101775365	SNL4	19.44	19.59	16.68	36.48	35.06	34.69	11.14	11.9	13.36	13.52	17.97	16.97
ncbi_101762124	ASK1	64.08	77.75	65.57	108.95	107.48	105.93	51.26	50.57	56.09	62.25	58.83	58.77
ncbi_101782018	ATG1A	6.49	9.29	8.55	16.44	15.55	16.35	2.95	2.58	4.17	5.02	5.43	6.36
ncbi_101760887	BHLH49	6.14	6.72	6.74	11.23	10.53	8.41	3.4	3.17	4.24	4.92	4.5	5.12
ncbi_101785546	ABCD1	19.41	19.34	19.58	38.08	35.47	29.57	12.98	13.39	16.47	14.47	17.21	15.91
ncbi_101777033	WAV3	63.77	104.63	61.39	359	310.41	312.32	20.89	17.39	12.61	13.1	10.59	13.38
ncbi_101781158	Os12g0198200	16.04	20.53	15.96	121.85	98.55	107.93	1.41	2.13	2.03	0.63	0.5	0.63
ncbi_101755571	SCL1	8.74	11.55	9.79	45.09	38.99	37.94	5.24	6.87	5.33	5.04	7.31	8.26
ncbi_101778437	AVT3B	4.17	3.58	2.06	18.13	14.81	14.43	1.29	1.81	1.91	0.69	1.06	1.23
ncbi_101771029	ZFP1	47.63	64.41	49.9	163.26	152.65	138.95	58.36	38.13	41.73	44.95	38.47	38.97
ncbi_101784144	HXK7	3.47	5.49	4.47	38.19	28.66	31.91	6.54	1.53	1.61	1.69	2.5	1.59
ncbi_101756198	DTX12	19.43	24.48	19	78.87	73.16	77.37	11.81	18.64	16.56	12.92	11.48	10.18
ncbi_105913612	CAT1	4.28	7.43	6.45	17.36	16.38	16.76	4.49	5.8	4.02	3.54	3.85	2.6
ncbi_101786872	PUB23	0.66	0.77	0.75	2.43	2.39	2.75	0.45	0.61	0.3	0.04	0	0
ncbi_101783950	G6PDH	62.66	69.37	75.09	206.9	184.01	206.55	61.62	56.3	54.69	43.72	44.59	42.17
ncbi_101786191	Os06g0561000	4.04	4.87	5.44	21.05	18.41	21.08	5.09	3.91	4.09	1.3	1.24	1.96
ncbi_101778363	CAM2	149.13	176.28	143.72	326.12	292.62	286.82	176.67	132.33	120.35	107.77	89.36	123.76
ncbi_101761715	--	3.67	7.07	4.09	12.1	11.1	11.57	4.85	3.89	3.33	2.01	2.63	3.49
ncbi_101752826	CYP76B10	0.27	0.55	0.15	1.55	1.28	1.4	0.42	0.03	0	0	0.11	0
ncbi_101767834	BPA1	11.77	14.82	12.38	32.15	28.71	31.62	12.73	9.05	8.59	7.83	9.15	8.06
ncbi_101755619	GDH2	87.4	70.87	66.9	229.19	197.31	168.91	35.89	22.47	19.38	12.3	15.54	16.24
ncbi_101753232	NHO1	89.68	116.31	104.02	221.56	179.38	179.36	66.42	41.5	40.85	40.67	43.44	59.08
ncbi_101768570	GGCT2;2	26.28	37.53	34.54	95.07	77.33	65.95	13.96	12.07	11.49	8.78	7.87	11.71
ncbi_101772990	--	17.28	35.53	30.94	93.44	80.19	75.24	15.49	9.59	6.89	8.16	6.97	9.63
ncbi_101759876	ABC1K8	73.22	91.26	77.43	170.71	180.87	155.99	63.6	58.26	57.35	51.2	63.32	59.5
ncbi_101767387	--	46.77	60.91	40.28	192.17	170.83	148.69	17.17	18.03	13.64	18.83	12.62	16.87
ncbi_101780836	--	78.99	105.72	77.27	282.72	256.47	228.44	48.96	55.51	52.55	42.34	35.61	32.21
ncbi_101761243	ALY2	13.86	18.04	14.02	33.71	32.36	33.33	6.6	6.19	6.23	6.38	6.17	6.75
ncbi_101776691	ENT3	90.88	213.08	152.07	479.1	483.29	475.07	21.87	21.41	19.33	6.16	8.48	9.89
ncbi_101754620	UBC7	159.62	217.32	157.42	562.1	552.43	573.63	64.5	59.24	71.24	38.74	33.34	32.08
ncbi_101757959	ACX1	126.44	131.95	121.95	324.08	313.28	300.35	91.72	81.27	78.37	68.96	73.39	69.66
ncbi_101769908	ILK1	18.82	21.42	18.47	53.29	48.37	48.05	12.73	13.05	10.93	11.28	10.35	8.38
ncbi_101761481	CCR2	8.41	8.12	7.98	21.9	18.21	19.34	1.81	1.14	1.49	0.57	0.92	0.9
ncbi_101755296	CSC1	75.18	109.77	79.97	231.42	201.63	191.91	26.54	27.35	32.32	13.19	13.4	12.59
ncbi_101765015	MST4	288.92	462.84	351.97	887.42	761.55	800.92	87.62	133.17	136.32	63.8	38.4	49.22
ncbi_101762889	Cht6	143.23	173.65	193.32	579.66	536.41	464.7	12.39	67.68	64.07	7.36	3.55	4.86
ncbi_101765694	CID9	34.5	44.99	44.41	105.71	103.98	82.2	16.94	20.83	18.39	11.29	12.33	10.02
ncbi_101753745	TUBA3	72.91	84.43	84.41	174.73	190.87	173.01	34.77	34.69	47.93	31.47	23.18	22.1
ncbi_101773899	GAD1	62.24	64.09	74.15	166.68	161.6	143.53	29.52	36.55	51.35	22.7	16.69	14.05
ncbi_101772223	--	17.44	35.44	16.92	99.72	58.56	68.71	1.52	3.17	4.85	1.78	0.11	0.57
ncbi_101778548	LPP2	8.49	11.03	6.95	32.32	20.37	26.23	5.32	5.06	3.38	1.74	2.35	2.45
ncbi_101769023	WNK5	41.29	51.74	52.03	168.63	112.16	154.09	18.47	13.21	12.97	10.28	7.17	16.85
ncbi_111256244	--	0.5	0.83	0.57	2.09	1.15	1.92	0.11	0.26	0.31	0	0.07	0.27
ncbi_101752909	LFG2	25.48	32	26.01	56.23	43.41	52.93	21.35	28.74	27.88	27.19	20	26.02
ncbi_101784178	mcfF	9.54	12.31	9.57	20.39	15.07	17.56	8.96	11.42	8.6	8.52	7.91	9.11
ncbi_101762804	IAA15	47.71	57.71	46.79	94.62	85.24	90.38	30.39	41.51	47.61	29.61	19.26	19.5
ncbi_101770544	MYB2	5.64	6.92	4.33	13.12	10.17	13.1	2.17	6.11	5.18	1.52	1.48	1.41
ncbi_101768027	NRG2	2.66	3.68	4.33	11.23	9.11	10.6	3.19	4.06	4.28	0.82	1.02	2.51
ncbi_101782077	CRK20	5.89	8.7	7.64	20.76	13.42	17.85	4.99	6.68	5.33	1.02	1.09	1.7
ncbi_101760042	PUB23	54.56	64.23	79.07	216.84	175.77	185.05	31.54	50.68	52.27	6.4	2.6	4.47
ncbi_101761844	LYK4	2.79	4.52	5.1	11.91	9.63	10.82	1.9	3.26	2.8	1.41	0.25	0.52
ncbi_101761749	ALDH2B7	119.32	136.99	137.92	172.56	163.8	171.73	142.42	115.02	139.13	140.89	116.64	124.59
ncbi_101783626	At5g67140	19.3	21.46	22.4	25.57	26.25	33.33	21.72	18.08	23.75	21.51	20.78	21.21
ncbi_101780024	PVA22	29.06	23.06	24.4	40.9	35.95	40.1	21.87	26.43	23.87	27.48	23.14	28.55
ncbi_101763107	SD18	0.19	0.16	0.11	0.94	0.63	1.23	0.03	0.06	0.02	0.1	0.26	0.17
ncbi_101774512	--	0.7	0.43	0.27	3.01	2.11	2.96	0.31	0.65	0.34	0.56	0.73	0.45
ncbi_101779332	NAC045	3.41	3.46	1.64	27.89	18.54	33.34	3.82	4.49	5.71	2.7	3.55	4.44
ncbi_101753275	SSRP1	54.06	42.64	41.1	63.96	64.42	68.73	47.63	43.72	51.72	47.82	50.74	49.08
ncbi_101760215	KING1	2.76	1.68	1.74	4.16	4.99	6	2.32	2.1	2.19	2.86	2.37	2.45
ncbi_101786747	COAC2	19.08	17.69	15.78	25.93	27.25	32.2	20.05	17.25	16.13	20.2	19.42	19.99
ncbi_101766329	TCTP	740.96	505.68	595.45	897.72	974.02	1101.15	605.89	587.45	593.26	583.81	465.24	416.92
ncbi_101779545	--	13.25	7.17	6.13	14.03	18.72	20.73	8.08	7.54	8.52	8.25	6.95	5.79
ncbi_101766584	GOLS2	1023.05	451.1	665.11	1109.69	1641.23	1826.02	297.2	369.16	515.2	280.86	207.69	202.85
ncbi_101781803	CXE8	2.35	1.84	1.7	2.86	3.74	4.19	1.04	1.6	1.35	1.12	1.08	0.87
ncbi_101764587	--	0.63	0.36	0.34	0.94	1.28	1.65	0.18	0.49	0.44	0.28	0.16	0.22
ncbi_101765711	GAUT8	3	2.1	2.43	3.61	5.82	5.97	0.93	2.4	2.42	2.3	1.44	1.53
ncbi_101765115	SAPK4	14.78	12.39	14.73	22.54	25.45	24.99	10.37	11.3	14.3	10.85	8.93	9.83
ncbi_101768534	UEL-3	6.43	6.5	5.57	11.29	12.95	12.12	4.36	4.81	6.56	4.43	3.22	4.5
ncbi_101758311	PAP27	2.15	3.63	2.46	6.7	9.2	10.11	1.29	1.38	1.1	0.39	0.64	0.43
ncbi_101756046	WRKY22	9.73	9.5	8.99	22.27	34.15	33.67	7.65	3.96	3.3	2.35	1.98	3.82
ncbi_101771996	At2g38640	79.63	84.19	70.32	121.83	177.22	181.26	57.6	58.9	56.12	56.18	37.47	49.1
ncbi_101775019	EIF5	194.17	222.9	196.65	351.17	399.89	432.55	130.4	136.32	165.41	154.17	144.76	172.65
ncbi_101778023	--	39.6	27.73	29.25	115.62	156.35	170.13	12.33	7.44	7.92	11.07	13.03	14.37
ncbi_101784220	At2g24240	2.75	2.42	2.84	7.39	9.84	10.94	1.32	1.06	0.68	0.51	0.55	1.42
ncbi_101765929	RCD1	57.06	57.96	50.38	63.66	82.27	88.22	40.55	39.46	39.77	41.31	46.62	46.31
ncbi_101785996	UBQ3	7.59	5.75	5.39	10	13.7	15.76	3.1	2.55	3.85	2.52	3.85	5.62
ncbi_101757962	--	5.23	6.51	3.22	8.8	13.42	15.12	2.45	1.7	2.49	1.96	1.31	2.18
ncbi_101774803	BHLH130	19.5	17.45	13.97	22.07	33.55	34.44	13.23	12.74	13.56	13.85	14.08	12.27
ncbi_101765003	NPF6.3	10.28	7.29	7.99	18.33	34.78	51.25	3.89	2.68	3.43	2.38	2.16	1.96
ncbi_101784278	XIPI	3.26	3.1	1.3	5.59	9.33	15.38	0.68	0.75	0.88	1.73	0.93	1.02
ncbi_101779715	CPK9	4.3	5.09	4.48	6.62	8.98	12.29	3	2.18	2.94	2.83	1.76	2.31
ncbi_101783147	BHLH82	13.96	15.44	13.53	18.12	21.17	25.38	12.62	11.64	13.84	11.15	10.06	12.03
ncbi_101784961	NUP58	0.56	0.35	0.51	0.94	1.12	1.4	0.34	0.25	0.46	0.31	0.28	0.61
ncbi_101766324	AAP7	1.51	1.25	1.56	2.57	4.17	4.79	0.3	1.03	1.06	1.19	0.27	0.87
ncbi_101778370	DTX54	0.4	0.27	0.42	0.68	1.18	1.39	0.05	0.11	0.13	0.21	0.17	0.13
ncbi_101754634	UGT85A24	155.53	82.01	127.35	375.91	430.13	610.91	8.43	8.16	11.01	2.56	2.03	2.62
ncbi_101773529	LRK10L-1.2	46.91	35.08	54.03	76.42	91.12	119.15	25.26	25.15	29.92	27.26	24.6	25.71
ncbi_101762997	RFS	120.99	93.9	123.89	254.3	320.92	366.08	43.81	32.8	34.87	36.05	36.33	40.08
ncbi_101782762	GRF1	238.84	219.24	263.32	393.43	436.35	468.97	167.4	199.15	168.65	195.03	171.28	177.8
ncbi_101768081	CYP90A4	14.89	13.98	13.84	21.62	23.06	24.74	6.43	14.9	12.95	11.38	10.58	12.37
ncbi_101768390	ALY1	83.73	72.23	68.56	95.69	110.64	112.11	58.72	73.38	65.09	68.32	53.43	71.67
ncbi_101755395	AGO12	7.09	6.54	6.18	13.11	14.54	18.23	4.49	5.75	4.2	7.77	7.59	6.64
ncbi_101772524	PATL5	21.78	18.24	18.07	42.75	43.19	49.18	10.69	14.25	13.67	19.46	17.66	18.25
ncbi_101783146	At1g65240	22.67	14.59	19.22	44.84	52.15	55.41	5.71	9.41	10.15	21.66	17.66	19.32
ncbi_101758573	GF14A	100.95	111.83	107.72	154.98	169.35	176.61	86.45	101.31	85.74	124.13	97.17	102.09
ncbi_101764573	MBD10	85.44	87.05	97.35	118.73	133.2	140.38	67.91	70.33	63.61	87.05	74.65	81.51
ncbi_101754080	PUP3	1.54	4.05	2.87	22.1	19.48	27.12	0.85	2.13	1.05	0.6	0.25	0.15
ncbi_101764795	At3g28580	17.34	18.22	16.98	60.75	53.4	70.11	12.19	15.39	14.11	7.79	4.71	11.07
ncbi_101783869	RIXI	0.07	0	0.27	0.89	0.82	1.24	0	0	0	0	0	0
ncbi_101756579	IDI2	20.23	18.99	20.7	41.82	43.83	61.15	13.68	17.34	17.95	14.52	13.98	16.41
ncbi_101760981	--	7.66	6.17	5.88	56.92	59.59	79.7	1.92	3.64	5.7	2.27	1.44	4.11
ncbi_101753328	RPP25	24.16	21.45	21.39	39.07	34.45	40.44	14.7	17.25	15.03	18.27	17.97	18.27
ncbi_101779230	--	15.12	13.14	14.58	29.46	25.84	33.63	10.03	6.78	10.4	10.48	8.69	10.71
ncbi_101756298	--	60.86	47.72	54.6	138.49	134.87	159.13	40.02	41	36.78	46	32.31	63.37
ncbi_101781720	TSJT1	42.49	34.1	35.99	67.34	67.52	71.68	24.31	31.62	29.67	39.32	25.92	35.97
ncbi_101762092	At1g47056	13.26	16.61	13.76	16.39	16.53	19.06	13.43	13.71	11.25	11.9	13.68	11.76
ncbi_101760055	EXO70A1	6.29	12.43	8.16	14.34	13.97	18.8	11.8	7.66	4.97	7.88	6.48	6.28
ncbi_101766756	--	0.8	2.22	1.5	3.79	3.63	5.41	1.79	1.65	0.8	1.3	1.09	0.36
ncbi_101785798	BHLH48	0.28	0.07	0.42	0.7	0.77	1.94	0.28	0.19	0.03	0.07	0.04	0.16
ncbi_101764725	DDB_G0281669	0.17	0.98	0.84	2.22	1.18	3.37	0.35	0.44	0.38	0.3	0.1	0.22
ncbi_101781971	ROH1	6.92	11.46	8.88	23.01	12.33	38.36	9.04	9.95	6.97	4.35	3.74	11.1
ncbi_101764555	GSVIVT00037159001	0.37	1.69	2.94	3.73	3.99	6.3	0.53	1.24	0.54	0.28	0.34	0.13
ncbi_101775158	CHIT3	1.66	3.7	4.86	6.57	7.6	10.81	1.94	1.92	1.59	1.95	1.72	3.1
ncbi_101758193	RIPK	38.73	48.17	46.48	75.22	62.88	96.86	25.07	21.56	25.66	17.67	9.93	18.92
ncbi_101770130	CML5	19.92	29.66	27.98	66.41	40.97	84.65	9.97	15.25	10.66	3.45	2.3	3.24
ncbi_101770897	--	7.73	15.11	12.33	33.13	28.28	42.07	8.26	6.29	4.75	3.67	2.88	1.69
ncbi_101776411	--	15.69	18.18	18.71	49.4	41.37	65.11	8.99	10.78	8.53	9.9	7.09	4.93
ncbi_101766892	Asnsd1	9.22	11.98	11.73	15.51	15.13	18.46	8.3	8.52	8.58	8.05	6.75	7.59
ncbi_101782791	TULP10	4.87	9.36	9.85	15.53	15.54	22.37	5.86	5.4	4.01	4.87	2	3.13
ncbi_101757167	ESP3	0.25	0.41	0.29	0.53	0.48	1.09	0.04	0.13	0.22	0.04	0.02	0.08
ncbi_101775635	At1g74320	0.94	1.41	1.44	2.53	2.34	3.6	0.25	0.32	0.69	0.74	0.34	0.57
ncbi_101782272	--	0.66	1.41	0.65	2.4	2.42	3.49	0	0.18	0.93	0.3	0.21	0.27
ncbi_101773503	RIPK	72.97	77.06	88.24	85.31	76.33	139.32	50.44	75.16	70.11	44.43	24.5	46.84
ncbi_101770679	TLP1	5.5	9.23	11.6	15.1	9.66	27.9	9.74	11.86	11.68	2.07	2.43	3.92
ncbi_101772636	ATJ20	0.09	0.26	0.55	0.63	0.53	1.33	0	0.22	0.47	0	0	0
ncbi_101765542	PUB21	49.86	55.95	59.89	71.61	70.22	94.71	53.34	62.84	50.96	16.6	10.03	30.25
ncbi_101785020	CCR1	42.48	48.47	46.84	63.72	66.91	89.31	50.52	51.09	58.43	28.88	20.82	26.68
ncbi_101761055	NUDT13	8.52	8.16	14.98	15.71	17.79	19.68	9.16	13.48	11.54	4.08	5.12	5.15
ncbi_101766611	CNR10	9.19	9.95	11.85	12.98	20.14	25.59	5.53	16.92	10.77	4.44	1.98	6.12
ncbi_101772074	RPK2	2.67	2.23	3.97	2.76	5.42	7.04	2.53	3.58	2.97	1.72	0.79	1.17
ncbi_101779132	--	277.01	294.25	323.2	385.63	370.09	450.06	286.8	292.82	291.38	263.93	119.3	183.55
ncbi_101762585	--	394.39	502.5	398.4	587.64	533.32	639.78	382.2	390.27	351.75	257.47	134.61	175.42
ncbi_101777297	VQ22	108.09	125.89	101.46	160.93	135.86	156.22	110.83	102.36	109.47	107.87	55.63	73.55
ncbi_101768889	CAX3	13.75	12.73	14.86	20.48	19.31	18.98	11.37	12.38	14.35	11.52	9.54	9.07
ncbi_101769884	HOX18	1.29	1.15	1.69	2.84	2.17	2.9	1.41	1.05	1.74	1.26	0.38	0.43
ncbi_101784481	--	19.74	24.33	24.1	36.17	26.64	39.38	8.68	19.04	21.68	14.58	7.67	11.51
ncbi_101760427	CYP72A14	50.95	58.26	72.99	115.41	74.61	106.47	44.21	57.27	49.24	28.19	23.71	29.47
ncbi_101778726	At5g08350	22.35	23.02	43.94	75.9	54.47	81.07	8.65	16.82	21.54	6.42	7.54	8.92
ncbi_101776164	ZW10	8.24	7.85	8.1	9.7	10.18	10.54	8.71	8.84	9.69	8.06	8.36	6.81
ncbi_101782843	otub-1	9.91	9.61	10.26	13.28	15.36	15.51	12.19	10.58	13.35	8.09	8.72	6.22
ncbi_101753022	TOL9	38.15	32.67	36.19	45.37	48.65	50.62	42.56	44.67	42.45	31.85	32.93	34.12
ncbi_101757042	DIM	3.41	2.35	1.44	7.32	10.16	10.38	5.8	6.03	6.81	2.03	1.93	1.4
ncbi_101775718	CAT3	366.53	221.16	257.33	541.54	783.94	806.45	307.3	375.34	514.96	264.64	160.72	240.81
ncbi_101774465	PHN1	2.06	1.34	2.19	2.69	3.81	4.81	1.87	2.95	3.37	1.1	1.09	1.07
ncbi_101780742	ACO1	18.69	15.48	12.98	25.82	41.53	48.37	21.91	31.65	34.4	14.26	13.33	13.8
ncbi_101762661	PLT4	0.77	1.14	0.47	2.06	2.24	2.52	1.33	1.21	0.79	0.87	0.45	1
ncbi_101782007	--	0.33	0.55	0.45	0.95	1.22	1.17	0.69	0.62	0.47	0.61	0.3	0.53
ncbi_101758770	At2g36630	13.66	24.48	19.16	54.73	75.27	105.17	43.6	37.4	28.62	34.62	23.07	25.22
ncbi_101773790	RINO1	105.18	106.56	91.81	262.52	312.38	334.09	185.27	161.02	148.39	113.51	155.16	122.96
ncbi_101776290	BGLU16	46.09	51.13	49.99	171.31	224.83	226.13	126.03	88.31	68.55	55.97	58.1	62.52
ncbi_101763180	BT2	3.1	0.44	1.88	15.09	22.99	29.33	11.25	7.91	8.37	3.95	3.68	5.74
ncbi_101781070	At3g15890	9.42	9.33	7.02	18.24	24.04	28.49	13.43	11.1	9.43	7.76	8.27	9.14
ncbi_101777526	PRX112	2.24	2.41	3.05	10.23	11.06	12.84	7.2	7.12	1.71	1.21	1.77	0.8
ncbi_101777996	TMN9	2.4	3.12	3.72	5.06	6.08	7.42	5.29	5.09	3.53	3.35	3.12	3.24
ncbi_101772368	AAP3	34.47	30.42	29.78	80.9	93.29	106.42	53.29	62.79	61.26	40.92	32.47	49.66
ncbi_101775105	APT1	46.91	50.54	48.79	82.65	74.16	87.94	62.77	67.93	57.33	45.72	45.73	48.89
ncbi_101758894	--	0.51	0.62	0.83	4.19	4.17	5.09	2.44	2.09	1.73	0.78	0.23	1.14
ncbi_101777817	--	10.5	12.33	10.95	19.58	19.63	21.84	14.48	13.18	13.58	9.56	10.55	11.72
ncbi_101754732	IP5P9	2.13	2.9	2.51	8	8.03	7.84	4.51	3.39	3.37	1.77	1.13	1.5
ncbi_101783737	IDH1	21.26	18.84	14.9	43.1	43.12	41.24	22.37	18.45	22.21	16.2	12.54	12.34
ncbi_101785414	NAGK	0.78	0.59	0.51	2.7	2.37	2.68	1.03	1.32	0.95	0.68	0.53	0.18
ncbi_101758649	At3g50280	1.3	1.29	1.59	8.78	7.69	10.05	3.43	2.44	3.65	0.88	0.79	0.47
ncbi_101756246	IAA1	18.31	19.05	16.1	42.97	45.96	51.91	22.22	21.99	18.28	14.43	12.34	14.15
ncbi_101779414	EMB1187	145	159.41	127.92	405.72	403.11	465.97	182.81	154.36	127.97	73.97	66.98	59.11
ncbi_101766718	LHW	12.33	10.91	8.57	22.61	21.14	25.42	14.2	10.57	11.07	5.41	5.07	7.22
ncbi_101775110	PHYA	12.05	8.57	9.39	21.25	23.87	28.2	15.32	11.06	15.02	7.16	8.17	9.33
ncbi_101777416	DOF5.1	0.52	0.59	0.7	1.12	1.43	1.65	0.77	0.57	0.8	0.6	0.37	0.54
ncbi_101757095	LECRKS5	10.15	10.06	14.44	24.05	28.3	35.62	15.14	10.8	8.13	4.65	2.76	4.31
ncbi_101770334	FBL23	3.96	4.48	3.41	10.55	12.67	16.77	8.06	3.26	3.26	1.11	1.34	1.1
ncbi_101762744	YSL14	48.05	40.06	32.75	56.1	80.65	82.03	50.57	42.1	37.62	29.23	28.93	27.07
ncbi_101779598	sec61a	36.78	30.21	29.41	43.08	62.28	61.22	30.81	36.99	30.8	24.07	23.64	24.63
ncbi_101756487	BZR3	8.66	6.14	7.67	11.24	15.71	15.06	8.42	8.59	9.29	3.46	3.75	4.64
ncbi_101766349	MYOB2	4.06	3.8	3.9	6.66	7.99	7.5	3.95	3.69	3.63	1.78	1.72	1.73
ncbi_101758971	At1g71900	22.09	20.66	18.67	27.62	34.44	33.91	19.43	21.72	19.69	14.83	12.95	13.15
ncbi_101784567	DRB6	19.25	17.54	17.97	27.81	38.99	36.78	16.11	17.13	18.39	10.84	8.8	9.62
ncbi_101786584	CTR1	2.11	1.63	1.82	4.02	4.91	5.23	1.25	2.12	2.2	1.83	1.27	1.53
ncbi_101783217	SEC15A	1.84	1.21	1.69	6.28	7.07	7.35	1.46	2.49	1.9	1.1	1.14	1.93
ncbi_101783911	--	1.97	1.69	2.12	6.1	7.13	7.41	1.15	1.91	1.6	1.4	1.33	1.37
ncbi_101771766	-	12.46	9.88	12.34	29.65	43.42	43.54	11.78	20.31	18.77	14.86	11.79	9.17
ncbi_101782956	SRL2	22.51	17.53	24.52	35.01	39.41	42.5	22.13	24.54	25.22	20.37	19.24	18.64
ncbi_101777278	NPF5.2	20.49	22.12	17.99	31.33	37.94	42.22	20.96	22.19	23.53	25.52	16.37	20.21
ncbi_101778435	MYB30	1.88	4.11	1.87	19.47	27.92	30.9	3.91	6.26	4.48	10.81	3.19	2.59
ncbi_101753668	PUP3	0.72	0.8	1.06	3.86	4.46	8.01	0.98	1.04	1.15	0.6	0.41	0.18
ncbi_101770043	--	2.12	2.62	3.77	17.14	20.82	27.88	3.53	2.3	3.1	3.23	2.54	4.05
ncbi_101773021	SLC1	0.63	0.65	1.66	6.03	7.83	11.25	0.45	1.13	1.22	1.3	0.57	0.81
ncbi_101778008	METK3	10.39	11.21	11.51	22.05	26.61	34.14	11.3	12.82	12.14	11.56	13.27	10.69
ncbi_101780647	PER54	4.04	2.43	2.36	19.96	32.56	44.39	5.65	3.62	4.18	1.76	2.05	1.55
ncbi_101781707	At4g18380	5.43	7.84	7.97	13.38	13.28	15.93	6.52	7.05	6.93	3.95	4.05	7.7
ncbi_101758602	--	0.42	1.2	1.4	3.01	4	4.08	1.04	1.14	0.77	0.63	0.54	1.46
ncbi_101763822	At3g16190	0.05	0.19	0.35	0.8	0.96	1.01	0	0.11	0.12	0	0	0.06
ncbi_101761113	Os01g0256800	0.72	0.97	1	1.96	1.7	2.45	0.86	1.26	1.2	0.91	0.81	1.05
ncbi_101763431	CYP76C2	0.48	0.49	1.67	6.28	5.55	7.83	1.86	1.96	1.43	0.3	0.74	2.19
ncbi_101756014	At1g67480	0.18	0.14	0.12	1.29	1.31	1.8	0.28	0.24	0.21	0.11	0.23	0.28
ncbi_101779043	--	0.49	0.52	0.41	3.72	3.6	5.04	1.07	0.54	0.88	0.29	0.44	1.17
ncbi_101762300	4CL4	22.03	16.36	19.48	41.13	35.29	36.73	23.97	19.54	21.54	5.15	5.51	5.25
ncbi_101770162	--	42.12	46.79	41.7	78.81	75.41	75.74	56.7	51.65	54.13	23.22	23.33	29.01
ncbi_101766397	PSD2	16.3	14.95	17.7	23.98	23.9	24.83	20.51	17.24	19.09	12.93	9.84	9.62
ncbi_101771197	RABA2A	9.84	9.43	11.15	14.88	17.23	16.79	12.08	12.71	11.55	5.47	4.67	5.25
ncbi_101772987	BF2056	7.58	7.31	7.02	8.67	10.33	9.71	8.07	7.52	8.96	5.88	5.76	6.46
ncbi_101761194	At1g19450	9.22	7.51	6.87	13.18	13.39	13.23	10.11	7.79	10.83	6.15	5.11	4.92
ncbi_101761206	TUBA1	181.04	171.74	137.68	297.27	307.72	266.75	190.23	181.88	201.93	115.17	72.61	78.08
ncbi_101782892	cnrB	41.15	40.8	36.77	58.57	69.3	64.87	43.6	42.53	48.61	35.08	28.1	27.5
ncbi_101760332	APCB1	113.81	97.83	102.68	123.71	130.93	125.68	106.09	109.11	113.16	92.04	75.41	99.14
ncbi_101783775	--	76.24	48.84	60.35	78.74	96.65	110.08	68.07	64.45	80.47	60.39	24.93	46.18
ncbi_101752880	Os01g0953600	35.16	27.42	30.99	42.27	45.12	46.1	33.23	37.33	32.71	30.88	28.61	26.72
ncbi_101784675	At1g61500	1.32	0.07	0.87	2.57	2.66	2.92	1.26	1.09	0.93	0.47	0.52	0.16
ncbi_101754568	CCR4-4	15.85	12.3	14.75	21.33	19.56	23.46	14.45	15.74	14.89	10.65	10.81	11.9
ncbi_101771984	At1g61500	12.53	1.03	10.75	18.43	19.7	22.26	8.31	9.26	11.3	3.97	4.9	5.6
ncbi_101784494	SALR	11.77	8.03	7.64	12.4	14.19	12.67	10.72	8.35	9.05	7.25	6.04	6
ncbi_101786947	ARF	192.23	163.09	171.09	214.43	215.89	212.32	178.77	181.42	184.88	176.87	143.18	146.98
ncbi_101768042	UAF30	21.65	12.15	17.76	21.63	24.66	22.09	15.25	16.31	15.31	9.61	8.91	10.48
ncbi_101785107	--	4.76	2.58	3.18	5.75	7.37	5.74	2.11	2.55	4.24	1.01	0.56	1.06
ncbi_101758550	SWEET2B	220.16	132.94	172.96	220.78	308.28	261.19	147.16	169.49	202.38	114.03	73.88	68.39
ncbi_101776472	--	75.29	63.9	61.02	84.18	98.73	91.23	59.3	67.71	71.45	52.58	47.73	44.02
ncbi_101759174	HD6	49.32	48.48	46.18	56.13	66.48	59.07	58.35	50.29	49.3	51.87	42.35	40.69
ncbi_101765061	TDC1	4.88	4.91	4.35	6.79	9.46	7.08	6.19	3.83	3.22	4.72	1.88	1.78
ncbi_101786478	--	0.72	0.95	0.6	1.04	1.73	1.48	0.94	0.99	0.45	0.79	0.52	0.58
ncbi_101778862	v1g161623	30.37	29.93	25.58	37.28	43.51	39.99	30.07	33.25	26.35	26.79	26.84	23.95
ncbi_101767392	At4g19900	14.8	12.88	10.54	19.7	25.46	20.85	14.04	13.72	12.36	10.34	9.11	10.75
ncbi_101773255	At5g54860	5.1	5.86	3.67	7.78	10.5	8.19	6.17	5.81	5.3	4.47	3.41	4.21
ncbi_101755052	TIFY6A	18.77	16.89	19.71	21.53	24.63	28.2	16.31	16.7	13.15	10.66	8.5	9.92
ncbi_101773547	--	4.19	3.31	4.74	5.1	6.81	8.03	3.35	3.62	2.19	2.08	1.43	1.96
ncbi_101763006	GL1-2	9.2	7.1	11.1	12.06	21.25	19.83	12.81	6.48	6.18	4.65	2.44	2.79
ncbi_101786560	UBC2	105.71	98.26	111.35	114.16	138.01	142.83	104.81	92.53	98.29	84.62	66.41	64.54
ncbi_101777219	LECRK4	2.94	4.14	4.85	4.95	6.17	7.46	4.27	4.15	2.53	1.87	0.91	1.08
ncbi_101780334	--	3.79	5.5	4.68	6.22	7.45	7.72	5.05	5.29	3.5	3.23	2.52	2.16
ncbi_101760616	--	33.46	38.58	49.78	62.61	81.74	93.84	58.54	45.39	39.31	17.98	14.15	21.18
ncbi_101775422	HSP26-A	1.21	1.27	1.63	2.14	3.02	2.73	1.8	1.87	1.43	0.86	0.52	0.77
ncbi_101781109	NPR4	19.86	18.26	21.89	34.81	45.6	48.64	31.62	29.87	22.74	12.07	10.26	12.71
ncbi_101752569	PUB33	18.05	36.53	31.22	49.25	52.5	51.43	28.75	27.09	29.22	19.92	13.9	17.71
ncbi_101754325	--	1.22	1.93	2.16	3.62	4.55	4.02	1.25	1.31	1.09	0.91	0.34	0.38
ncbi_101782071	At2g33490	22.25	26.7	25	43.86	46.52	44.46	26.55	23.65	23.43	18.6	16.75	18.4
ncbi_101786264	ASP1	35.53	43.19	40.84	55.43	61.62	61.62	38.75	39.22	37.73	34.24	33.39	35.78
ncbi_101778519	NOI4	66.27	91.88	79.07	128.05	149.76	140.56	101.18	79.58	76.98	80.06	52.33	58.61
ncbi_101766002	PUB24	6.67	8.59	7.27	11.05	13.8	13.09	9.05	7.37	7.79	5.03	5.53	5.67
ncbi_101785783	PYL4	20.77	38.81	30.98	53.24	63.64	61.63	44.48	27.13	23.45	12.76	14.68	12.48
ncbi_101754381	EREBP1	186.47	171.54	160.19	241.92	270.36	280.03	150.47	115.13	95.74	66.49	53.71	57.95
ncbi_101760674	At4g39670	39.94	37.88	38.7	69.87	70.3	74.73	39.91	24.83	15.14	12.4	10.96	13
ncbi_101782571	--	477.74	369.62	416.4	711.44	768.01	715.65	498.6	326.18	225.3	264.77	166.57	236.07
ncbi_101761013	--	3.91	3.02	3.4	6.13	7.92	6.87	2.8	2.82	1.37	1.49	0.69	0.55
ncbi_101767969	RISBZ2	25.08	24.14	23	34.12	38.68	31.54	23.18	19.68	15.38	13.96	14.31	15.12
ncbi_101753558	Prelid3b	16.66	18.39	16.92	23.76	28	28.55	16.38	18.23	15.42	11.94	7.9	10.43
ncbi_101755180	ANT2	418.26	374.77	380.52	536.29	601.77	596.23	390.49	421.56	390.52	290.26	215.69	224.01
ncbi_101769713	UBC11	661.53	532.42	644.61	925.37	892.22	930.87	518.66	531.6	507.29	459.67	345.83	324
ncbi_101781464	NPF2.11	23.22	21.07	21.59	34.93	33.51	36.14	18.72	19.09	16.65	11.25	5.04	7.88
ncbi_101754367	OR23	2.28	2.05	3.01	3.62	3.8	3.56	1.36	2.79	2.61	2.4	1.83	3.4
ncbi_101785236	Os10g0415800	3.37	2.14	3.94	6.65	7.48	7.07	1.04	2.72	4.63	0.91	2.49	7.26
ncbi_101761251	LPAT5	16.41	13.2	19.25	21.56	18.72	18.99	12	16.84	16.6	14.44	14.83	16.29
ncbi_101761525	JGB	0.11	0	0.53	1.12	0.88	0.46	0.04	0.33	0.28	0.19	0.23	0.59
ncbi_101762662	DIR1	5.35	3.53	5.14	13.8	17.03	9.02	0.65	3.59	10.77	2.59	0.49	0.26
ncbi_101780471	RABA5A	4.13	4.48	4.16	5.49	5.85	4.78	3.35	4.01	5.06	3.81	2.89	2.99
ncbi_101779362	MYBS3	16.46	18.65	17.3	22.01	21.94	18.44	12.95	16.68	21.11	14.17	13.28	15.51
ncbi_19526775	atpF	21.43	22.98	21.17	29.36	31.94	27.01	16.64	19.09	31.14	18.44	15.99	21.74
ncbi_101759900	MBD9	7.67	9.14	8.56	10.61	11.33	9.68	6.21	8.26	8.89	6.44	7.89	7.6
ncbi_101769369	RBOHF	22.23	27.76	26.54	32.38	33.25	28.64	19.13	25.39	26.5	16.02	19.65	21.45
ncbi_101768905	FUN12	3.54	3.14	3.06	4.74	5.38	4.5	2.23	3.07	3.91	2.63	2.88	2.21
ncbi_101786969	--	17.29	16.08	15.59	20.25	23.18	19.27	10.39	13.56	15.95	11.2	13	11.99
ncbi_101786253	B'THETA	3.79	3.84	4.29	6.8	7.32	5.78	2.86	4.27	4.68	3.29	3.49	3.73
ncbi_101785947	Os01g0681900	15.42	16.77	17.57	31.95	28.23	23.79	9.71	13.22	18.17	9.29	11.26	11.68
ncbi_101756043	BT1	13.25	15.04	12.2	34.17	30.15	21.9	8	12.19	13.54	9.39	9.41	10.21
ncbi_101773984	CYP714C2	0.42	0.73	0.52	2.35	2.3	1.4	0.03	0.37	0.56	0.06	0	0
ncbi_101758636	LOGL5	56.94	51.39	40.63	75.65	61.54	49.81	21.55	65.9	50.53	35.6	30.08	45.31
ncbi_101774314	D3	19.09	13.38	14.64	20.94	21.44	15.79	11.83	13.93	15.33	14.23	9.46	17.15
ncbi_101758540	SYP32	18	18.28	15.26	23.26	24.82	22.54	17.82	14.37	13.41	15.46	12.81	12.02
ncbi_101784892	PSI1	11.52	11.62	9.24	13.4	14.78	13.83	10.35	8.06	6.27	7.93	9.09	6.84
ncbi_101757314	AUR1	3.64	4.47	2.33	6.11	6.9	5.6	2.34	2.4	1.39	1.47	2.36	1.9
ncbi_101778549	--	8.04	9.49	7.69	11.58	13.23	11.65	8.04	7.01	6.6	7.07	6.76	7.28
ncbi_101767121	SEC13B	6.15	9.12	6.05	10.43	11.72	9.55	7.22	5.22	4.8	4.75	6.09	4.34
ncbi_101774561	--	2.36	3.14	2.24	4.61	4.74	3.91	2.38	0.83	1.6	1.24	1.56	1.32
ncbi_101757735	--	9.17	6.72	5.45	12.32	15.28	11.99	7.1	5.26	4.43	6.95	5.75	7.37
ncbi_101763852	--	21.93	20.44	20.01	27.17	29.16	27.18	17.88	17.29	14.33	18.83	15.93	19.02
ncbi_101769643	MYB73	1.54	2.08	1.07	2.97	4.12	2.15	1.07	0.67	0.79	1.18	0.79	0.82
ncbi_101754371	CINV1	54.16	71.05	55.93	105.47	127.81	103.07	36.62	34.75	33.63	37.12	30.26	33.38
ncbi_101753392	ATL47	1.91	2.31	1.56	4.41	6.69	4.21	0.18	0.44	0.33	0.04	0.24	0
ncbi_101756911	--	2.56	5.04	2.6	8.78	14.26	8.43	0.31	0.18	0.38	0	0	0
ncbi_101761959	RF2a	10.61	10.89	10.08	14.81	18.19	14.86	8.5	9.09	8.41	8.41	9.38	8.06
ncbi_101780335	gpsn2	2.75	3.45	3.11	9.55	13.61	8.14	1.5	0.68	0.87	0.11	0.06	0
ncbi_101756726	FPS	6.79	6.08	5.93	11	11.11	12	4.31	5.08	5.27	5.27	4	3.62
ncbi_101753235	DRP1C	26.46	25.9	21.31	39.18	41.75	38.7	18.99	22.43	21.21	19.1	18.97	13.84
ncbi_101783997	At3g11180	11.56	11.83	6.29	25	25.2	23.79	4.9	7.35	5.65	8.99	4.87	4.03
ncbi_101769078	TUBB2	10.09	9.88	8.33	16.86	21.28	18.72	7.51	10.42	8.78	6.29	3.33	3.97
ncbi_101783914	--	14.76	18.97	14.51	42.01	53.84	40.58	12.14	17.15	13.4	4.37	3.95	4.67
ncbi_101765019	NIP1	10.02	10.01	11.27	25.23	28.19	20.36	8.04	8.32	8.45	9.07	3.72	4.37
ncbi_101772579	Os11g0174000	34.21	33.33	27.43	45.85	53.24	44.72	27.4	27.12	29.15	25.27	23.12	23.65
ncbi_101752619	Dnajb4	9.28	8.44	7.21	14.38	16.38	13.8	7.58	6.73	7.29	5.4	3.75	4.92
ncbi_101786757	SAPK7	79.61	75.33	63.24	117.43	115.96	104.5	68.03	61.77	64.75	55.37	48.81	52.6
ncbi_101766711	RSH3	119.92	164	112.38	280.17	331.75	329.76	61.91	35.11	28.36	41.09	38.72	42.6
ncbi_101770769	BAT1	9.6	19.43	11.03	28.58	39.86	40.02	2.42	1.65	1.84	1.87	1.44	2.65
ncbi_101774625	PSY1R	0.72	1.33	0.79	1.97	2.47	2.23	0.35	0.31	0.44	0.41	0.43	0.35
ncbi_111257874	--	0.41	1.17	0.43	1.99	2.3	2.29	0.08	0.15	0.03	0.04	0.13	0.23
ncbi_101753422	--	31.58	54.23	27.32	76.32	97.66	77.68	11.11	20.94	17.09	18.86	10.12	21.61
ncbi_101776517	GSTU8	8.25	22.88	16.17	45.61	51.6	48.41	4.71	11.88	7.32	5.87	3.67	8.47
ncbi_111256326	At2g05160	1	2.5	1.82	4.61	5.5	4.38	0.54	0.76	1.19	0.53	0.6	1.12
ncbi_101758414	CDT1A	0.37	1.16	0.21	3.93	4.11	3.12	0.06	0.25	0.08	0.14	0.06	0.54
ncbi_101772177	MYB308	14.96	25.93	13.32	45.51	48.6	37.02	14.11	11.59	10.43	10.26	12.32	13.87
ncbi_101766906	SKIP11	24.23	31.31	26.74	61.15	65.81	55.25	26.07	26.08	22.31	19.27	20.03	19.51
ncbi_101777281	GMD1	7.04	9.71	7.37	27.93	29.82	22	6.01	4.85	4.78	5.58	2.46	2.72
ncbi_101756351	BBR	9.42	12.09	9.61	22.95	24.92	21.53	9.84	7.9	5.45	9.59	7.71	6.98
ncbi_101773913	MKK2	19.93	24.36	19.68	36.67	38.02	33.35	17.31	18.49	14.78	17.24	15.46	16.32
ncbi_101761661	Os08g0143400	3.58	5.2	3.58	8.26	9.83	8.37	4.48	4.63	4.32	3.06	3.48	3.73
ncbi_101756873	TBP2	17	19.57	15.25	37.77	49.42	42.33	16.84	11.42	9.43	11.01	13.25	14.97
ncbi_101783954	NPF7.3	0.35	0.71	0.4	2.25	3.15	2.63	0.76	0.28	0.13	0.38	0.44	0.27
ncbi_101769518	JMJ706	19.48	24.6	23.46	93.52	128.3	95.09	26.17	18.21	11.36	7.45	9.39	7.15
ncbi_101775016	GSTU8	2.85	3.41	3.31	13.26	16.27	13.33	3.57	4.02	1.92	1.89	1.88	2.11
ncbi_101784926	PUB23	3.41	6.71	3.36	21.73	30.75	24.38	0.53	1.62	0.77	0.33	0.56	0.56
ncbi_101758958	BAG2	0.59	0.46	0.31	3.7	4.79	3.5	0.07	0	0	0.06	0.06	0
ncbi_101763282	RAB25	1.2	0.73	0.63	4.47	6.19	5.12	0.29	0.19	0.03	0.11	0.15	0
ncbi_101764103	SFH6	18.16	14.92	14.77	20.7	25.38	22.59	15.2	14.05	13.19	11.5	13.17	13.6
ncbi_101779725	APS1	5.17	2.66	2.32	7.74	10.08	6.83	1.33	1.8	1.31	0.41	0.21	0.67
ncbi_101780966	--	48.76	46.95	45.29	55.01	62.16	55.22	42.9	45.29	45.04	40.27	42.28	42.95
ncbi_101760072	SDR1	6.25	3.96	7.6	10.4	16.01	12.17	1.2	2.55	4.23	0.71	0.86	0.99
ncbi_101774273	CRK15	12.47	15.68	16.2	27.25	39.08	26.86	7.46	9.99	10.73	3.09	3.07	7.92
ncbi_101784328	E2FE	2.58	1.77	2.37	4.19	4.86	3.92	1.89	1.33	1.44	1.11	1.25	1.2
ncbi_101754036	--	144.54	113.83	174.1	338.11	408.81	376.84	102.81	89.09	83.65	73.08	77.33	63.37
ncbi_101781558	At5g26710	0.55	0.15	0.83	1.59	2.28	1.93	0.17	0.07	0.14	0.08	0	0.07
ncbi_101769530	RABA5D	4.11	3.75	3.71	7.56	11.87	9.75	0.51	1.05	2.03	0.35	0.21	0.32
ncbi_101783382	ABCB21	37.56	29.97	31.52	61.43	89.68	73.23	12.24	17.9	18.97	13.3	12.62	13.41
ncbi_101754453	NPF2.11	75.71	47.19	53.63	167.88	243.21	159.03	15.25	30.38	41.13	14.23	9.6	10.67
ncbi_101768576	--	10.93	6.37	7.43	18.77	33.84	23.08	2.62	2.84	3.68	2.07	0.82	0.67
ncbi_101755101	ELF3-2	24.88	23.51	23.91	34.67	49.63	38.84	23.24	18.92	21.32	18.75	18.63	21.06
ncbi_101770095	-	91.66	101.75	114.16	186.45	250.59	217.19	80.41	87.26	75.95	67.33	56.14	66.36
ncbi_101786071	NAP1;2	10.77	10.13	9.99	28.37	45.72	37.61	4.05	3.48	6.18	0.93	1.82	1.72
ncbi_101778039	WAK5	1.27	1.84	1.63	5.02	8.25	6.31	0.47	0.2	0.17	0.46	0.19	0.15
ncbi_101786974	CIPK10	2.98	3.85	3.04	7.96	12.43	9.5	1.83	1.4	1.55	0.98	0.89	1.16
ncbi_101756421	URGT6	6.37	4.56	4.75	9.06	14.86	6.53	0.3	0.7	0.35	0.11	0.51	0.31
ncbi_101771629	WRKY13	60.34	33.9	65.19	84.48	150.44	69.24	9.34	19.94	14.63	1.24	0.28	0.25
ncbi_101779619	GH3.5	44.09	38.55	36.57	67.85	96.39	55.21	22.08	39.03	26.55	23.36	20.06	18.62
ncbi_101763747	--	4.33	3.13	3.45	9.15	11.2	6.01	0.52	0.8	0.78	0.69	0.23	0.21
ncbi_101766706	--	4.82	5.13	5.05	9.38	12.88	7.55	1.74	2.54	2.55	1.85	2.73	1.81
ncbi_101773022	Os04g0252400	16.37	15.37	17.33	19.58	23.8	19.51	15.06	14.69	12.39	10.59	12.48	13
ncbi_101779623	ERH1	2.04	2.77	2.14	4.09	6.3	4.29	2.59	2.2	1.16	0.89	1.19	1.41
ncbi_101758620	--	7.45	7.65	6.39	14.73	13.71	10.12	5.81	5.63	4.59	3.65	2.2	5.05
ncbi_101760912	SLP2	5.09	5.97	3.95	11	11.05	6.8	4.48	5.08	3.68	1.92	2.71	4.53
ncbi_101780430	SUN3	11.08	12.92	8.22	21.15	19.93	13.65	10.29	9.57	8.91	5.24	7.48	6.98
ncbi_101761559	At5g60570	1.64	3.08	2.45	11.31	10.67	6.36	2.65	3.44	3.83	0.96	0.65	0.64
ncbi_101780746	HCT1	39.68	52.24	50.05	147.61	147.83	100.59	42.48	45.67	52.43	15.21	13.72	18.86
ncbi_101754626	HXK3	10.76	12.8	10.84	22.95	21.99	15.66	10.93	10.99	11.07	6.16	5.4	5.7
ncbi_101762672	CCC1	7.75	9.72	9.13	15.78	15.69	12.42	7.93	8.94	8.07	6.49	6.84	5.79
ncbi_101776604	SGPP	9.42	12.66	10.44	35.81	35.33	19.31	12.58	12.85	7.5	3.92	3.67	3.51
ncbi_101783302	--	17.73	15.49	14.37	34.5	33.75	20.85	7	12.38	13.47	9.02	5.43	4.83
ncbi_101762549	--	3.23	3.17	5.25	17.49	15.04	8.39	0.66	2.77	2.15	0.07	0.07	0.07
ncbi_101766758	BX1	182.98	140.25	167.8	669.2	637.22	312.07	88.38	144.62	66.85	18.45	4.41	3.75
ncbi_101756377	SUVH4	4.59	3.56	3.98	7.18	9.26	5.78	4.11	3.29	4.26	2.69	2.91	3.54
ncbi_101782792	Os01g0693400	2.39	3.25	2.91	10.74	14.16	8.01	3.22	3.25	3.22	2.14	1.39	2.4
ncbi_101785878	--	32.44	20.34	36.93	125.43	156.84	80.33	38.94	56.52	32.19	18.47	17.15	32.53
ncbi_101764969	SAM1	507.96	375.34	331.02	712.75	759.55	640.46	432.57	443.18	443.95	283.57	252.17	338.56
ncbi_101765998	TMN12	22.68	21.86	22.21	39.55	45.27	35.45	22.98	19.85	19.05	12.85	11.6	10.8
ncbi_101773809	DYM	8.41	8.31	8.78	20.39	20.04	16.98	9.48	9.89	9.64	4.43	5.59	4.49
ncbi_101775851	LECRKS7	4.76	4.84	5.21	13.32	14.29	12.4	6.29	5.49	5.72	1.49	1.91	1.87
ncbi_101758021	CIPK23	108.55	120.4	112.6	176.14	201.07	197.85	87.94	58.78	54.02	56.88	47.08	66.63
ncbi_101777468	Os01g0887700	21.84	22.4	22.05	33.19	34.33	37.58	14.74	15.29	14.04	15.19	10.35	13.16
ncbi_101768526	Cht8	125.02	159.3	134.2	322.64	306.34	328.42	95.17	59.92	48.11	40.12	25.77	65.91
ncbi_101778679	LOGL1	77.41	79.97	88.57	143.93	139.07	144.63	66.19	55.99	55.48	50.83	38.94	43.06
ncbi_101757608	--	18.78	21.61	13.94	29.03	30.42	35.99	12.23	11.49	9.09	9.89	10.98	11.31
ncbi_101780926	PMEI10	2.42	5.39	3.09	9.39	9.03	10.69	2.89	1.19	0.93	0.96	0.57	0.69
ncbi_101767269	--	9.78	14.39	9.15	18.54	16.88	21.51	3.6	5.27	5.8	2.33	1.14	1.78
ncbi_101779888	WRKY71	22.77	40.68	29.39	49.96	47.89	54.06	19.35	15.1	16.5	14.29	13.93	15.98
ncbi_101760138	PSI2	61.51	95.99	78	136.8	136.18	142.54	24.07	27.84	26.74	22.25	17.32	19.71
ncbi_101760208	TMEM184A	43.7	55.28	48.68	70.13	67.53	69.15	34.78	34.61	29.06	29.23	25.96	31.95
ncbi_101752840	THI1-2	52.36	69.04	31.44	94.86	115.64	107.95	23.87	25.23	41.89	25.25	8.3	8.96
ncbi_101756100	ERF118	146.74	174.35	159.07	204.88	248.9	225.06	110.23	140.09	137.6	132.58	88.6	98.01
ncbi_101783867	UAF30	36.83	35.75	32.84	44.94	50.82	49.01	26.82	30.95	29.29	29.34	22.37	25.41
ncbi_101768209	GFPT2	49.34	58.67	55.13	112.56	135.85	129.61	26.1	33.69	25.68	23.11	20.74	18.43
ncbi_101771582	XA21	16.66	26.09	19.94	53.55	60.08	60.99	1.9	5.48	4.9	0.29	0.47	0.84
ncbi_101763345	--	7.69	7.47	8.71	17.52	21.06	18.13	2.78	4.74	5.01	2.62	0.49	0.88
ncbi_101786319	At1g31850	11.53	11.08	10.38	30.77	36.99	33.02	2.77	7.33	7.15	2.12	1.35	1.64
ncbi_101785119	HIPL1	3.6	4.07	4.01	7.83	7.47	8.92	1.49	1.71	2.79	0.53	0.38	0.54
ncbi_101756804	Rnf167	48.83	53.09	51.56	68.21	73.3	80.52	35.66	41.36	43.65	37.97	31.47	38.06
ncbi_101783519	Os03g0179900	15.46	18.41	19.74	31.83	38.35	47.06	5.41	9.36	11.03	3.97	3.31	3.1
ncbi_101786741	SD25	2.53	2.9	2.79	4.35	5.31	6.24	0.77	1.8	1.94	0.74	0.9	0.67
ncbi_101768204	Os10g0369500	3.82	3.9	4.28	5.02	7.31	6.89	3.44	1.92	2.17	2.43	1.82	1.42
ncbi_101786041	EDR2L	40.66	49.75	45.43	55.26	69.83	72.62	40.76	23	24.29	24.47	29.28	23.01
ncbi_101766024	RIN2	31.12	36.72	32.83	39.25	41.96	43.31	30.9	30.42	25.6	27.94	29.83	28.31
ncbi_101777264	--	7.83	9.09	9.69	12.01	14.25	14.19	8.78	8.37	5.19	7.03	7.17	6.65
ncbi_101757399	WAKL15	5.42	6.38	6.19	9.95	16.75	14.51	1.29	3.52	3.14	3.26	2.84	3.94
ncbi_101757611	--	21.77	24.87	21.52	33.9	39.25	35.94	15.01	17.69	15.44	17.52	18.62	18.57
ncbi_101777931	-	103.98	115.36	94.85	173.91	218.77	194.85	69.96	64.06	64.16	73.27	65.79	74.45
ncbi_101778657	--	35.03	40.73	34.17	77.81	112.33	95.2	18.38	17.39	16.13	21.08	19.94	22.85
ncbi_101775134	DENND6B	11.1	11.55	11.23	14.39	18.17	19.44	9.05	7.83	7.87	9.33	9.6	7.73
ncbi_101764318	TPST	31.87	36.98	33.37	51.3	65.79	71.91	18.3	19.27	22.95	19.1	15.61	15.66
ncbi_101784560	MEE14	10.33	15.76	14.13	25.07	33.82	40.88	1.84	4.12	4.18	4.36	1.8	3.38
ncbi_101769559	RR42	2.32	2.7	2.9	3.93	6.51	6.48	0.28	0.75	1.25	1.48	0.75	0.67
ncbi_101779520	WAK2	11.18	12.17	13.26	19.23	33.64	32.44	0.51	1.6	2.56	0.13	0.31	0.26
ncbi_101775721	GT2	14.66	13.09	11.11	17.35	22.8	21.07	10.09	11.98	11.18	9.04	8.25	7.46
ncbi_101777600	ctdspl2	62.16	55.68	50.96	73.06	84.47	83.84	52.18	54.53	50.24	51.14	45.71	48.76
ncbi_101775065	TIM17-2	25.86	26.52	20.04	30.45	39.42	37.45	23.31	22.32	17.96	20.6	20.67	18.21
ncbi_101780635	Os11g0547000	9.78	10.86	6.01	13.19	23.25	18.89	4.86	2.13	2.32	2.21	1.39	1.91
ncbi_101758029	At1g29880	15.07	15.03	16.67	15.71	21.94	21.21	6.95	8.86	10.53	10.07	9.47	9.53
ncbi_101779187	AIRP2	5.33	5.86	4.75	5	9.46	8.81	1.7	1.07	1.96	2.3	1.2	1.12
ncbi_101763022	MKK5	90	67.02	73.35	90.53	137.47	129.66	13.71	22.67	22	10.1	4.85	7.39
ncbi_101775988	ERF110	89.7	44.87	66.77	75.32	126.57	132.43	6.98	12	21.28	0.45	0.57	0.81
ncbi_101779799	PBS1	42.49	31.58	27.82	46.43	73.93	78.79	11.68	7.47	8.12	4.38	4.02	3.94
ncbi_101783629	--	36.75	25.84	28.63	40.23	50.61	57.06	14.63	16.6	18.05	10.83	9.4	11.75
ncbi_101754598	MLO-H1	55.5	58.54	64.61	65.38	110.99	127.84	15.69	15.74	20.7	29.57	13.76	21.93
ncbi_101778644	--	15.64	13.72	13.17	17.38	27.49	31.79	5.03	7.51	8.87	6.38	6.13	6.64
ncbi_101785498	OsI_21475	202.69	175.95	225.6	241.15	342.6	444.57	47.34	87.6	115.34	60.98	65.55	57.06
ncbi_101768584	TPS11	476.71	317.54	444.38	520.46	608.34	601.51	191.32	192.4	181.28	189.99	100.41	261.46
ncbi_101767065	PLIP2	88.58	73.47	77.2	111.24	115.49	144.22	41.52	19.77	19.32	15.68	20.46	24.59
ncbi_101765030	SYP22	77.94	71.2	72.69	94.34	97.64	106.59	39.32	38.36	39.36	34.85	34.78	34.62
ncbi_101785619	At1g11960	184.94	167.02	167.39	251.27	238.52	259.67	36.33	41.72	42.07	36.36	38.72	42.48
ncbi_101772902	TFIIB	96.58	84.15	84.58	125	132.74	131.32	44.35	44.97	45.37	44.1	34.45	45.61
ncbi_101784876	RING1A	13.25	11.33	10.95	15.59	17.06	16.66	5.64	5.85	6.08	4.33	3.14	4.4
ncbi_101769599	Gba2	66.46	79.25	65.98	85.79	115.23	130.12	14.99	18.66	18.05	25.16	30.63	20.89
ncbi_101773204	SIZ1	90.34	90.16	95.2	100.36	111.86	111.97	61.49	58.52	59.67	63.68	69.07	65.1
ncbi_101759160	GOS2	467.59	371.73	366.59	515.72	605.79	621.87	221.2	199.98	217.79	258.09	238.03	289.82
ncbi_101776605	--	3.68	2.04	3.19	4.24	5.54	6.4	0.47	0.73	0.44	1.11	0.64	1.72
ncbi_101754947	BPM1	96.18	82.65	77.27	99.29	111.87	126.07	50.76	49.3	51.22	60.2	55.79	52.15
ncbi_101781767	CRK2	24.25	16.39	18.26	23.93	27.87	34.21	7.59	7.49	6.58	6.51	5.36	5.19
ncbi_101764409	BAG1	1.27	1.16	1.15	1.76	2.04	2.83	0.35	0.55	0.37	0.36	0.32	0.53
ncbi_101779134	ABCA7	4.22	5.04	4.83	6.9	7.14	9.13	2.32	3.14	2.86	2.74	2.98	1.84
ncbi_101755076	PREP	3.39	4.06	7.04	9.48	9.09	12.46	0.43	0.23	0.6	0.13	0.41	0.67
ncbi_101775010	CCDC25	26.39	10.75	24.12	43.73	45.7	54.58	1.37	3.59	4.83	0.87	0.47	1.43
ncbi_101757319	AKT1	38.16	29.56	38.54	51.7	66.64	70.85	11.38	8.95	10.34	4.59	5.59	6.04
ncbi_101772683	PP2A13	42.21	36.16	46.89	65.43	82.35	89.31	17.84	16.61	17.63	10.84	8.28	14.47
ncbi_101776101	NPF2.11	9.98	6.56	9.68	14.13	14.28	19.08	4.65	6.41	6.02	2.88	1.89	2.66
ncbi_101780697	EXPA8	1.08	0.66	1.24	2.08	2.14	2.71	0.62	0.72	0.41	0.11	0.39	0.2
ncbi_101759225	Os01g0957000	15.14	15.49	19.67	25.52	32.98	33.32	11.27	12.08	12.9	7.96	8.12	10.11
ncbi_101753591	At1g56130	45.81	43.04	55.33	91.26	111.12	109.64	19.46	20.09	21.54	12.12	12.4	18.67
ncbi_101771132	OPT4	6.87	5.72	10.74	18.47	22.16	25.32	1.74	2.27	2.32	0.74	0.8	0.41
ncbi_101773855	C42C1.13	1.31	1.07	1.51	2.71	3.62	4.25	0.33	0.72	1.03	0.05	0.2	0.22
ncbi_101778141	CML16	212.73	162.07	246.03	315.6	425.23	486.6	140.61	126.5	117.09	83.1	48.71	101.68
ncbi_101786350	LRK10L-2.5	5.27	3.5	7.78	10.03	11.72	15.21	1.78	2.43	2.26	1.47	1.2	1.15
ncbi_101760867	ATJ16	6.19	6.41	7.07	8.22	9.63	9.45	3.42	5.21	5.68	3.83	4.25	5.18
ncbi_101779435	RPPL1	7.57	8.26	9.3	9.03	12.5	11.6	4.88	7.31	6.33	4.83	5.16	5.45
ncbi_101776923	GSTU8	10.83	13.49	16.08	20.69	27.14	23.08	4.06	9.81	6.19	4.82	3.91	5.68
ncbi_101779450	--	16.1	23.87	23.74	34.91	53.03	50.61	6.43	13.95	11.15	6.53	2.59	7.15
ncbi_101780272	AHL10	20.33	25.39	20.72	28.04	35.46	35.95	10.23	13.57	12.52	3.04	2.31	3.15
ncbi_101784511	RGA5	11.08	13.5	10.73	14.87	20.37	22.03	3.22	5.79	6.57	2.37	1.34	1.41
ncbi_101784404	Os07g0568300	45.4	46.16	40.84	56.09	66.02	58.6	26.3	27.06	27.55	27.9	21.23	26.72
ncbi_101755441	BIG1	8.08	9.27	8.13	11.87	14.73	12.8	5.19	6.39	5.46	3.84	4.22	4.64
ncbi_101762696	RCD1	153.44	151.7	157.32	172.75	191.43	176.25	128.5	129.26	134.61	122.25	127.7	128.65
ncbi_101755948	ARF19	12.46	14.28	11.93	15.22	18.3	17.47	6.69	5.99	7.2	4.05	5.95	5.86
ncbi_101760678	At5g55050	134.92	145.48	131.71	175.99	242.11	228.52	11.96	11.77	16.25	3.88	5.67	5.6
ncbi_101762883	rutD	17.04	17.76	21.43	24.28	34.94	33.83	0.97	2.71	2.62	1.33	0.51	1.2
ncbi_101753149	FAB1D	45.75	53.38	47.17	62.93	83.07	76.75	21.02	24.66	24.77	18.45	23.49	23.29
ncbi_101768567	EXO70B1	23.06	23.16	21.91	29.33	33.02	34.43	13.59	15.06	13.6	13.13	12.53	12.84
ncbi_101771765	NCL1	283.64	318.44	273.86	490.39	584.06	563.07	42.04	64.75	64.51	36.38	20.08	28.24
ncbi_101765745	MRF1	112.22	88.9	90.78	115.22	121.76	110.81	65.78	74.82	74.83	73.4	64.91	74.75
ncbi_101761166	PHT1	19.5	13.88	10.73	19.29	21.3	19.01	9.48	8.37	11.08	10	7.52	8.03
ncbi_101775372	--	53.42	36.44	21.27	57.49	58.51	45.48	11.83	13.84	18.01	11.31	4.93	12.12
ncbi_101758872	MKK9	1.44	0.58	0.63	1.39	1.73	1.59	0.22	0.42	0.49	0.29	0.4	0.18
ncbi_101765663	RZPF34	93.79	42.63	34.93	89.58	130.99	125.34	4.9	11.35	19.55	2.54	1.34	1.83
ncbi_101759142	HTR2	3.72	2.5	1.43	3.47	5.01	3.4	1.05	0.99	1.32	0.49	0.55	0.67
ncbi_101771880	--	1.8	1	0.63	1.79	2.5	1.69	0.46	0.57	0.98	0.3	0.36	0.16
ncbi_101755687	--	20.23	15.48	9.95	19.87	24.35	21.18	7.16	6.8	5.53	9.43	10.13	9.08
ncbi_101762051	MPK10	21.62	15.55	14.6	24.37	26.28	22.03	13.17	14.71	13.53	14.48	14.78	15.76
ncbi_101762880	--	24.21	18.09	18.7	27.95	30.61	27.14	14.35	14.02	13.52	17.92	16.85	17.15
ncbi_101772427	SAC8	18.57	17.62	15.68	21.74	24.4	22.99	13.01	11.71	16.14	12.93	13.43	14.48
ncbi_106804298	--	1.67	1.39	1.21	1.69	2.16	1.85	0.64	1.05	1.19	0.96	0.88	1.34
ncbi_101772546	LOX2.1	66.87	45.06	44.2	46.19	104.61	58.33	0.46	2.2	0.6	0.1	0.08	0.51
ncbi_101768532	nep1	13.86	13.32	15	16.08	29.66	19.65	3.89	4.39	3.23	1.76	0.27	1.31
ncbi_101768922	At4g16820	5.98	5.05	7.68	8.07	12.86	6.53	1.13	1.72	1.16	1.98	0.73	0.65
ncbi_101771563	TPS1	65.48	26.7	53.85	75.98	151.05	68	18.43	37.13	32.99	4.44	4.05	3.24
ncbi_101780108	ASA1	22.31	8.66	18.04	22.99	41.98	22.14	8.87	10.92	7.96	6.81	5.77	4.41
ncbi_101762083	PCF2	22.02	19	22.77	23.41	40.72	30.21	14.59	16.58	13.76	15.87	10.16	13.26
ncbi_101756598	At5g59250	7.82	5.7	8.11	8.14	11.05	9.13	5.17	5.76	5.49	5.73	5.23	4.26
ncbi_101775856	--	5.21	3.61	4.91	4.87	7	5.42	2.86	2.96	3.46	3.37	2.24	2.55
ncbi_101783910	Os03g0429000	21.37	10.3	19.66	32.87	30.5	25.81	10.09	7.58	4.27	4	2.62	4.99
ncbi_101776958	yif1b-b	26.79	24.09	27.92	37.6	37.9	34.82	18	20.6	16.26	15.22	14.78	15.73
ncbi_101782887	ABCC4	13.59	11.22	13.19	23.96	24.89	20.57	8.51	9.31	6.33	2.44	3.17	3.56
ncbi_101776916	MPK8	118.46	71	85.83	162.22	163.7	133.59	44.16	63.45	74.2	46.8	68.62	57.83
ncbi_101752841	TBP2	119.99	108.99	110.83	142.24	143.19	135.3	87.26	95.51	92.84	89.84	80.13	89.36
ncbi_101774324	--	4.26	3.95	3.71	7.04	7.13	5.49	1.99	2.67	3.12	2.18	1.29	2.3
ncbi_101767308	OsI_12825	17.18	10.56	10.6	23.96	32.08	23.31	2.84	3.86	3.6	1.05	1.17	1.16
ncbi_101769340	ABCI20	56.72	41.73	48.78	77.15	101.35	80.97	21.79	22.74	24.71	17.08	18.64	15.83
ncbi_101760431	TBL7	9.07	8.35	8.6	14.5	16.32	13.81	4.76	5.43	6.91	5.06	4.08	4.71
ncbi_101763863	PCMP-H43	7.82	5.7	6.98	11.88	12.79	11.6	5.23	5.14	5.82	4.63	4.19	4.36
ncbi_101756562	Itih4	18.23	14.43	17.62	30.96	32.11	27.81	10.59	9.87	11.05	6.57	8.49	7.65
ncbi_101756620	-	14.17	12.17	13.74	21.78	24.28	22.01	8.65	9.47	10.6	7.47	8.18	6.81
ncbi_101761894	CCR1	3.39	0.93	2.16	3.64	4.22	2.42	0.58	0.61	0.39	0.19	0.57	0.34
ncbi_101766220	ZOP1	21.11	14.6	18.56	22.82	25.54	23.56	18.16	16.26	15.75	14.59	16.22	15.43
ncbi_101783386	--	8.39	4.42	6.8	7.52	11.02	9.28	5.12	5.49	3.97	4.26	3.6	4.31
ncbi_101760333	--	1.96	1.78	0.4	2.62	3.31	2.23	1.1	1.23	1.93	0.86	0.63	0.84
ncbi_101766533	FZR3	0.37	0.3	0.1	0.83	1.13	0.67	0	0.18	0.38	0.3	0.06	0.14
ncbi_101772214	BIP103	154.92	150.11	127.65	171.37	197.79	171.94	122.23	129.04	148.39	142.73	128.76	128.88
ncbi_101777805	CSTF64	16.46	16.03	12.39	22.07	20.86	17.12	11.13	13.1	14.93	15.39	11.3	10.94
ncbi_101779956	--	2.59	1.74	1.59	3.75	3.95	1.98	1.36	2.05	1.74	1.49	0.76	0.73
ncbi_101754398	--	2.2	1.88	1.68	2.31	2.68	1.84	1.49	1.58	1.83	1.61	1.64	1.77
ncbi_19526852	psaC	9.9	7.64	4.11	10.2	11.09	7.24	3.76	5.84	6.62	6.72	6.36	4.13
ncbi_101753715	NAGK	17.18	20.59	18.1	19.23	21.76	20.8	14.28	15.92	17.24	18.76	15.68	15
ncbi_101769425	ATL3	16.41	26.02	12.46	24.49	33.25	27	7.27	10.84	9.57	22.58	9.46	11.39
ncbi_101763830	--	67.04	53.44	49.65	65.8	69.29	70.28	38.38	50.42	49.36	68.62	44.82	44.77
ncbi_101775936	At2g24130	4.23	3.29	3.19	4.96	4.29	5.35	1.1	2.78	2.53	3.37	2.65	2.71
ncbi_101755178	--	0.47	0.71	1.03	0.56	0.95	0.46	1.5	0.57	0.83	0.47	0.7	0.65
ncbi_101772000	AP2-2	3.26	5.02	4.39	5.26	4.95	2.95	6.38	3.21	4.64	3.09	4.67	4.36
ncbi_101776016	FMO1	0.68	1.5	1.09	1.23	1.37	0.65	2.09	0.53	0.86	0.31	0.93	1.33
ncbi_101774451	ORP1A	41.78	42.65	34.83	46.55	46.84	45.52	56.3	40.38	31.64	28.96	26.65	29.68
ncbi_101767027	--	6.42	6.91	7.39	7.33	5.32	5.17	10.89	5.08	3.1	2.32	1.9	2.69
ncbi_101784748	NHL10	38.7	37.89	49.43	47.34	39.79	50.04	90.33	39.55	27.76	10.63	6.53	17.65
ncbi_101758785	TRP5	155.2	132.09	144.36	149.37	168.23	159.43	213.78	140.58	132.35	124.58	127.29	144.25
ncbi_101786297	SWEET1A	69.91	57.93	70.61	84.93	103.69	95.77	146.14	70.27	68.2	59.29	48.53	55.59
ncbi_101779498	COAC1	39.92	43.51	41.23	37.28	45.97	42.69	62.22	36.1	32.03	34.79	38.9	36.73
ncbi_101763587	CHIA	22.59	35.69	10.37	39.55	36.21	28.7	107.68	9.19	2.87	3.55	5.1	8.83
ncbi_106804107	BAM1	1.17	3.47	2.37	3.56	2.81	3.03	8.23	2.15	1.3	0.31	0.93	1.12
ncbi_101753112	ABCA7	6.28	9.02	8.35	9.04	8.66	6.13	10.43	5.29	5.92	1.83	5.79	6.04
ncbi_101784229	LPA1	1.15	1.94	1.97	1.13	1.36	1.31	2.35	0.98	1	0.52	1.46	1.1
ncbi_101784208	At1g33420	9.9	9.89	9.54	9.17	9.67	8.1	11.48	8.33	8.19	8.38	8.72	9.57
ncbi_101761482	APC2	21.36	21.97	19.74	18.19	20.86	17.07	23.38	19.16	16.85	16.59	15.85	15.94
ncbi_101772388	U2AF35B	79.36	92.68	83.12	75.1	68.91	69.82	106.07	72.69	71.75	64.14	67.36	66.59
ncbi_101780958	CHIT3	107.06	105.83	139.94	84	70.42	53.58	250.02	107.9	59.78	18.9	22.63	47.39
ncbi_101760101	Os05g0525900	0.7	1.29	0.3	0.91	1.75	0.92	1.24	0.4	0.21	0.42	0.33	0.21
ncbi_101784343	GTE7	28.79	31.89	25.4	28.34	33.7	28.78	28.62	22.51	21.09	25.73	24.76	23.15
ncbi_101754298	SPL9	32.77	37.11	34.87	36.48	41.92	35.67	36.85	31.35	30.24	31.05	33.23	31.65
ncbi_105914684	At3g14410	15.49	15.98	12.16	15.75	26.53	18.47	16.04	10.96	8.73	9.37	11.85	8.52
ncbi_101756322	PFK3	3.56	5.46	2.95	3.69	5.94	3.46	6.69	3.16	2.9	2.25	0.93	0.95
ncbi_101786927	BIR2	16.37	19.33	16.76	16.53	22.65	17.9	22.2	18.95	15.09	14.98	14.12	12.32
ncbi_101770675	--	11.23	10.14	9.46	11.23	13.22	10.22	11.95	9.98	9.37	8.47	8.32	9.79
ncbi_19526821	rps11	1.58	1.72	1.33	2.01	2.83	1.5	2.83	1.14	1.18	1.18	0.7	1.49
ncbi_111255796	--	0.8	1.1	1.11	0.99	1.04	0.88	1.13	0.79	0.9	0.98	0.75	0.71
ncbi_101766414	--	1	1.62	0.7	1.61	1.89	1.16	1.32	0.27	0.51	1.66	0.57	0.41
ncbi_101769962	MYB94	6.29	9.35	7.19	6.46	8.61	6.96	7.33	4.5	5.26	8.12	5.18	5.25
ncbi_101754389	--	0.44	0.39	0.58	1.24	0.57	0.55	0.1	0.39	0.17	0.27	0.34	0.03
ncbi_101752970	--	186.67	103.16	204.21	717.78	172.23	406.64	113.51	261.97	125.98	68.85	45.63	96.86
ncbi_101757829	GSTU6	0.27	0.13	0.07	1.03	0.1	0.11	0	0.22	0	0	0	0
ncbi_101784877	--	0.79	0.49	0.74	3.4	1.15	0.68	0.56	1.04	0.36	0	0	0
ncbi_101774398	MTARC2	0	0.05	0.11	1.89	0.37	0.51	0.22	0	0	0	0.3	0.09
ncbi_101767375	TPS2	2	6.26	3.12	79.59	3.45	19.12	3.06	3.53	0.35	0.26	1.77	0.45
ncbi_101755364	At3g50520	0.42	0.38	0.66	13.89	0.84	4.05	0.09	0.05	0.09	0.1	0.14	0.07
ncbi_101756845	At3g50520	0.56	0.2	0.29	21.24	0.56	5.56	0.08	0.08	0	0.04	0.2	0.32
ncbi_101764309	Mgst3	16.84	96.56	47.08	452.31	46.03	133.17	58.01	72.1	27.76	13.95	43.95	98.49
ncbi_101765324	--	1.08	1.38	1.7	18.1	1.82	2.3	4.02	2.1	1.98	0.92	0.89	1.53
ncbi_101759399	BHLH130	10.21	24.51	13.83	51.28	22.32	24.21	16.42	9.02	7.5	10.94	14.1	15.02
ncbi_101778177	--	5.85	38.56	14.54	141.04	42.87	54.98	16.81	2.09	1.24	6.52	16.91	22.72
ncbi_101756551	CAD8A	0.16	2.24	0.56	6.54	1.36	2.24	0.58	0.45	0.36	0	0.13	0.12
ncbi_101773024	MYC2	0.09	0.35	0.05	1.14	0.29	0.45	0.05	0.04	0	0.09	0	0.04
ncbi_101757205	--	0.02	0.32	0.06	1.15	0.17	0.05	0	0.03	0.03	0.03	0	0
ncbi_101758556	DREB1F	1.15	12.99	6.99	48.88	12.79	10.41	0.59	3.44	2.97	0.66	0.07	0.06
ncbi_101755113	AO1	1.55	24.43	7.31	75.29	14.82	16.61	1.26	2.23	1.37	0.22	1.23	0.89
ncbi_101764179	GSTU6	22.18	249.15	111.88	724.29	186.99	197.64	51.98	51.81	26.26	22.59	49.38	40.76
ncbi_101769282	--	5.15	32.11	8.32	76.21	21.18	19.07	1.1	2.17	4.4	10.12	4.99	2.96
ncbi_101758811	--	5.11	11.15	4.55	26.59	11.73	9.25	4.11	3.64	3.76	5.55	4.57	5.2
ncbi_101763212	PCO2	4.01	21.97	5.62	69.87	23.37	14.65	1.69	1.66	1.42	0.68	1.1	0.91
ncbi_101777647	FLZ1	6.84	22.05	28.15	70.86	25.4	25.14	4.07	12.47	11.32	2.31	2.64	1.01
ncbi_101756631	--	4.74	6.44	5.01	24.37	7.62	7.24	0.46	1.38	0.44	0.41	0.49	0.69
ncbi_111258048	ABR1	1.39	3.57	3.95	24.03	4.16	5.42	0.35	0.18	0.1	0.16	0	0.19
ncbi_101758749	LACS1	2.87	6.47	5.38	12.2	7.02	6.09	3.96	4.17	4.11	4.24	2.51	3.96
ncbi_101757670	AATP1	53.02	285.93	180.89	652.75	337.51	283.59	166.22	148.82	100.46	65.78	41.94	62.38
ncbi_101774507	CSE	3.83	8.57	6.48	23.55	11.13	8.87	7.21	4.64	2.41	1.1	0.73	0.86
ncbi_101778440	--	0.17	0.72	0.13	2.31	0.65	0.99	0.27	0.31	0.39	0.54	1.1	0.05
ncbi_101783953	Os12g0155000	0.19	0	0	1.18	0.05	0.76	0.13	0.06	0.2	0.2	0.2	0.12
ncbi_101765787	ephA	2.53	4.37	1.68	90.04	34.46	46.83	6.6	2.19	2.49	4.24	10.25	7.48
ncbi_101775300	ILL2	5.72	8.05	6.5	17.92	8.98	11.04	7.14	5.31	6.25	5.18	6.77	5.47
ncbi_101752757	CXE15	0	1.11	0.26	20.48	3.54	6.79	0	0	0	0.21	0.21	0
ncbi_101770594	RhGT1	4.13	25.52	9.52	174.56	63.56	64.35	9.5	9.43	5.73	3.3	6.09	8.27
ncbi_101753926	At4g20820	4.25	26.11	17.2	97.15	29.6	43.28	6.22	9.56	8.23	1.72	1.72	2.41
ncbi_101769771	RhGT1	8.5	50.03	28.06	143.44	61.43	64.66	7.35	14.28	8.75	6.57	6.26	10.68
ncbi_101768832	KAN2	0.6	1.08	0.77	4.39	2.13	2.42	0.03	0.16	0.21	0.03	0.26	0.09
ncbi_101786332	Os03g0188200	4.18	5.04	5.24	16.72	8.05	8.35	1.96	2.31	2.03	2.94	2.25	3.23
ncbi_101765028	--	0.24	1.85	0.7	3.89	1.73	2.11	0.22	0.29	0.53	0.47	0.62	0.61
ncbi_101758637	PRN2	36.99	94.32	84.61	225.54	125.85	154.3	38.89	34.27	35.89	40.93	45.38	54.31
ncbi_101770774	UGT73C6	0.31	2.98	2.28	11.2	5.19	6.6	0.34	0.67	0.67	0.53	2.24	1.24
ncbi_101759807	MOCS3-1	1.07	1.57	1.2	3.5	1.77	2.61	1.1	1.37	0.94	1.09	0.93	0.64
ncbi_101760515	ERF110	0.09	0.3	0	1.29	0.4	1.15	0.07	0.16	0	0	0.06	0
ncbi_101779723	OsI_032118	0.05	0.16	0.07	1.67	0.46	1.19	0	0.11	0.09	0.13	0.07	0.03
ncbi_101760219	STLP3	0.76	0.93	0.5	3.85	2.15	3.19	0.79	0.64	1.22	0.12	0.4	0.49
ncbi_101765372	--	0.14	0.58	0.26	1.75	0.84	1.51	0.44	0.25	0.49	0.1	0.2	0.13
ncbi_101769746	--	7.03	17.83	11.93	38.94	27.52	28.51	12.64	13.54	15.45	9.76	9.77	9.42
ncbi_101763017	NPF8.3	0.62	1.3	1.49	6.4	3.15	4.14	0.82	1.11	1.68	0.77	0.52	0.62
ncbi_101769384	SUVR4	0.3	0.45	0.44	1.39	0.91	1.1	0.34	0.23	0.38	0.17	0.24	0.27
ncbi_101752725	SBP1	136.48	168.78	139.14	304.17	195.1	186.77	179.41	138.81	165.76	131.45	141.76	124.66
ncbi_101766438	MYB124	1.61	3.43	1.67	6.3	4.1	3.44	2.49	1.58	2.49	1.82	2.2	2.18
ncbi_101768153	SULTR3;1	2.43	4.04	2.35	6.95	3.33	4.79	2.86	2.9	3.19	2.03	2.77	3.7
ncbi_101769266	Sb07g025950	0.21	0.62	0.1	1.52	0.24	0.82	0.11	0	0	0.1	0.34	0.13
ncbi_101769811	dnaJ1	12.03	28.37	13.85	45.86	16.17	30.91	21.73	9.2	10.33	12.1	16.55	11.62
ncbi_101769837	--	2.88	8.16	1.33	14.27	5.92	3.15	0.36	4.25	3.11	7.63	3.52	6.56
ncbi_101783578	--	1.49	3.27	1.53	5.26	3.52	2.35	2.8	3.41	2.73	3.25	3.19	3.21
ncbi_101766908	--	0.11	0.23	0.12	1.3	0.63	0.43	0.3	0.4	0.38	0.72	0.19	0.28
ncbi_101759026	ABCG1	4.48	6	2.67	13.92	11.7	10.92	6.6	5.48	7.57	9.88	4.66	4.19
ncbi_101769095	--	2.61	3.1	1.72	6.14	5.4	4.16	2.9	3.14	3	3.17	1.89	3.01
ncbi_101758173	PRN2	2.22	5.35	3.69	12.44	7.88	8.23	3.36	5.73	4.31	6.69	5.71	8.09
ncbi_101753136	UGT73C3	2.16	21.24	3	61	30.14	16.07	2.27	4.64	5.59	14.54	14.75	14.44
ncbi_101778593	ZHD9	4.19	9.43	7.23	21.97	13.26	9.71	4.1	4.41	4.26	8.21	6.08	7.26
ncbi_101755376	--	27.19	37.42	24.41	88.67	51.01	54.22	35.72	24.79	21.09	54.72	45.32	39.83
ncbi_101771398	FAM214B	31.51	52.17	32.31	158.86	70.29	81.64	27.34	22.99	24.65	65.34	71.23	62.01
ncbi_101764062	CDC27B	7.75	10.47	7.84	11.3	10.95	9.92	8.75	7.5	8.58	9.8	9.18	8.65
ncbi_101767619	--	4.1	9.07	5.58	13.41	10.19	8.84	7.7	7.7	5.84	11.44	8.5	6.11
ncbi_101769777	At1g67340	5.15	10.71	7.65	20.93	17.16	12.15	8.54	8.41	9.31	14.82	10.05	9.83
ncbi_101777189	--	7.92	22.54	15.41	28.8	25.89	14.41	6.37	8.24	2.85	1.64	2.9	5.31
ncbi_101781032	GLR2.8	2.47	7.66	6.39	10.42	7.61	4.62	1.01	1.5	1.02	0.32	0.24	0.59
ncbi_101772046	RhGT1	95.87	349.46	262.99	444.46	294.03	260.28	139.75	165.68	178.58	153.37	107.86	119.5
ncbi_101784059	LACS4	65.52	130.27	91.13	143.15	100.4	104.08	73.71	57.61	55.8	55.36	57.03	59.32
ncbi_101784113	BGLU31	401.77	1873.35	1012.08	2564.53	1170.54	1172.78	472.76	456.77	391.15	266.73	314.73	323.83
ncbi_111257857	--	1.81	11.12	6.38	16.18	7.9	6.92	0.66	0.83	0.68	0	0.08	0.2
ncbi_101772860	RhGT1	73.61	208.46	171.67	264.12	228.69	206.22	116.07	127.5	122.06	138.38	126.13	136.75
ncbi_101771682	SDIR1	16.6	26.83	19.29	30.74	26.53	23.02	12.26	12.88	12.86	15.39	15.71	17.04
ncbi_101784582	ABCC8	24.39	108.11	42.33	134.06	90.42	87.16	14.06	25.96	31.89	30.98	45.63	40.15
ncbi_101757204	CLT1	4.21	12.94	7.51	14.57	11.16	10.62	5.31	4.2	4.6	2.73	4.13	4.92
ncbi_101784200	UGT73E1	70.06	210.74	112.36	221.45	164.03	178.09	54.55	52.73	37.13	58.11	64.84	62.73
ncbi_101784753	PCMP-H33	4.63	15.86	8.94	18.45	11.76	13.94	3.82	3.63	2.45	3.78	4.34	4.47
ncbi_101753454	Os04g0338000	3.21	26.33	8.98	43.17	22.17	26.35	1.18	4.11	2.35	1.37	1.14	2.66
ncbi_101753053	--	5.18	10.79	8.23	14.06	9.94	10.18	4.77	5.12	4.83	5.63	5.6	6
ncbi_101776668	--	257.09	1021.43	552.74	1493.12	826.7	846.49	190.82	170.49	163.82	198.63	197.33	191.23
ncbi_101759999	PA200	43.22	70.48	55.39	91.88	77.64	71.04	33.55	39.64	44.27	36.57	39.91	45.51
ncbi_101762411	PFK3	2.55	7.43	4.92	10.01	6.22	8.03	1.65	2.19	2.87	1.97	3.13	3.4
ncbi_101759127	ABCG11	3.88	8.82	5.61	14.14	10.9	9.91	5.02	3.62	2.03	1.62	2.07	2.65
ncbi_101783948	SEC	151.69	232.94	174.68	248.15	240.54	214.83	162.51	141.85	128.81	124.57	139.47	138.33
ncbi_101767090	PBL19	5.63	8.28	5.99	8.57	8.45	8.77	5.91	3.83	3.26	4.04	3.79	5.28
ncbi_101778958	PR5K	0.49	1.14	0.53	1.03	0.99	1.06	0.48	0.38	0.23	0.12	0.31	0.31
ncbi_101771794	COL15	37.96	91.4	37.8	85.77	73.23	72.78	20.12	18.94	17.17	24.92	21.22	24.56
ncbi_101761908	SCL9	54.27	135.23	86.88	131.77	110.49	101.54	42.63	36.86	42.19	68.81	52.84	53.32
ncbi_101785542	--	65.73	127.22	84.44	135.99	125.78	103.89	37.04	45.08	45.1	64.38	46.06	40.49
ncbi_101756780	--	1.26	2.34	1.62	3.03	2.58	2.45	0.29	0.39	0.71	0.61	1.38	0.32
ncbi_101781692	CBBY	17.89	27.48	24.88	35.39	37.52	34.39	6.24	10.1	13.06	13.04	14.44	10.4
ncbi_105915210	--	4.77	13.88	11.64	14.28	14.32	18.39	2.2	4.28	4.25	6.47	4.28	3.76
ncbi_101777441	At1g80440	8.25	22.04	21.61	32.07	23.25	32.78	0.99	1.25	1.22	6.11	3.1	5.93
ncbi_101786373	GTE8	122.06	202.17	166.67	267.86	184.47	249.51	46.35	49.22	58.77	55.94	66.32	79.92
ncbi_101753713	Os12g0155000	0.87	1.96	0.67	3.61	1.58	3.54	1.21	0.55	0.47	0.32	0.51	0.29
ncbi_101777828	RPPL1	1.51	3.89	2.43	5.4	3.9	5.59	1.96	1.62	1.65	2.07	2.05	1.68
ncbi_101770008	At5g40670	34.24	69	47.49	89.93	63.22	78.46	59.13	49.54	41.31	38.3	42.54	39.61
ncbi_101785894	AATP1	15.1	36.58	25.38	58.7	30.37	39.56	24.85	23.99	18.35	14.87	17.69	9.64
ncbi_101766261	At1g28695	2.77	7.12	4.77	9.76	8.15	10.27	5.99	3.55	2.39	1.89	1.59	1.75
ncbi_101757540	NAC048	191.94	286.76	210.58	464.23	297.58	344.49	220.39	142.65	94.97	107.47	79.85	153.39
ncbi_101776551	GT-3A	7.4	13.55	6.96	18.84	12.69	15.24	11.4	6.45	3.89	5.24	6.23	6.73
ncbi_101758588	GSTU1	110.83	190.52	217.14	290.99	145.41	222.35	50.65	90.83	62.61	25.46	32.02	12.84
ncbi_101782069	ERF094	3.53	14	16.06	25.13	8.68	20.14	6.45	9.11	3.97	2.4	1.88	1.2
ncbi_101771295	At5g39865	25.14	53.42	44.42	64.39	41.98	48.78	36.39	25.12	25.55	21.46	23.15	23.54
ncbi_101785917	dnaJ	28.75	91.35	56.47	115.74	47.26	85.53	43.69	21.64	17.44	22.42	24.3	13.86
ncbi_101759413	LECRKS5	1.14	5.21	4.79	10.18	3.62	6.13	1.13	1.98	1.8	1.3	1	0.24
ncbi_101760689	GSTU6	4.5	18.94	12.58	29.17	8.99	15.64	4.47	8.18	6.13	1.83	3.72	4.81
ncbi_101773570	MDAR4	140.62	595	369	1019.49	361.82	552.65	256.91	243.09	151.21	71.21	90.51	83.84
ncbi_101780529	--	27.43	58.1	49.78	86.07	46.53	56.34	34.24	33.6	25.93	21.45	22.36	27.94
ncbi_101782374	SBT3.9	10.43	24.52	19.19	33.63	21.21	34.3	10.76	11.28	14.43	5.64	3.36	7.86
ncbi_101785069	SLAH3	2.89	4.68	4.34	6.16	4.19	6.13	2.72	2.93	2.41	1.86	1.46	1.89
ncbi_101767766	CPR	144.45	298.35	235.81	431.23	276.14	274.19	134.75	146.34	157.42	47.31	53.74	51.9
ncbi_101783695	LRX6	19.17	39.32	35.21	67.63	38.65	43.04	15.99	18.88	24.53	7.16	4.85	12.94
ncbi_111258026	SB20O07.14	40.33	128.2	104.25	251.4	123.14	143.24	42.52	53.84	55.73	14.74	4.3	11.27
ncbi_101779941	nep1	8.65	16.94	15.83	35.69	17.37	25.84	7.09	4.92	5.57	2.56	1.37	3.05
ncbi_101764101	--	14.08	55.22	33.47	85.9	51.81	67.6	1.52	6.52	8.14	1.22	0.87	0.86
ncbi_101773768	At5g49770	40.7	97.82	77.28	133.37	86.46	93.59	34.07	26.39	25.69	16.72	15.86	15.65
ncbi_101784872	ABCG36	176.64	529.18	463.9	914.46	517.67	565.13	162.37	127.1	112.24	36.45	33.95	41.77
ncbi_101762464	NPR1	25.9	45.07	34.59	51.02	43.45	43.54	25.17	23.91	26.76	26.63	18.29	12.13
ncbi_101765677	--	45.5	87.68	61.63	102.97	72.76	81.03	21.16	27.33	25.34	17.42	15.11	17.32
ncbi_101774021	Os05g0151300	717.23	1337.26	1011.15	1711.45	1055.58	1137.04	376.33	416.35	400.6	293.62	272.81	268.14
ncbi_101776814	GPX6	1882.72	3454.94	2588.79	4546.42	3131.09	2904.4	1067.48	1194.07	867.49	702.14	816.98	812.3
ncbi_101782712	LOG	199.33	442.98	371.7	607	510.22	417.66	49.77	121.88	70.7	23.95	17.13	20.52
ncbi_101755686	REV1	13.82	23.56	18.1	28.73	24.83	22.6	8.77	6.77	5.33	4.79	4.65	5.74
ncbi_101762465	ECT2	32.12	45.48	34.23	57.92	47.79	43.09	15.62	18.74	16.23	11.72	13.42	11.73
ncbi_101767833	RAB5A	80.37	115.14	105.56	170.95	130.66	137.72	58.18	51.06	50.29	34.72	35.02	36.73
ncbi_101774705	AERO1	24.5	42.22	32.39	56.12	42.7	41.29	20.72	17.64	15.41	12.15	10.49	11.63
ncbi_101781471	FH6	7.73	12.68	9.31	15.98	13.44	12.66	6.11	5.53	5.85	3.58	4.23	3.32
ncbi_101777641	--	24.04	30.81	20.6	35.07	26.55	24.79	23.84	20.91	25.72	19.43	21.87	23.72
ncbi_111257393	--	0.31	0.74	0.08	1.07	0.38	0.33	0	0.28	0.39	0.07	0.11	0.13
ncbi_101777372	PUB23	0.1	0.74	0.47	1.27	0.25	0.5	0.15	0.18	0.62	0	0	0
ncbi_101760546	--	10.28	24.2	13.66	42.3	17.4	17.05	9.14	12.9	16.3	6.56	8.81	14.52
ncbi_101780694	ERF071	8	45.92	19.22	115.11	20.57	27.44	11.44	26.57	34.34	3.49	1.9	5.61
ncbi_101777763	TLP1	0.18	0.6	0.54	1.08	0.29	0.19	0.06	0.11	0.25	0	0.13	0.05
ncbi_101776503	HSP16.9C	2.57	11.71	11.31	21.55	3	7.23	1.99	2.73	0.67	0.32	0.16	0.07
ncbi_101779286	SOG1	1.18	7.68	6.84	12.72	2.73	4.52	0.33	0.71	0.75	0.37	0.15	0.67
ncbi_101783769	HB	1.86	6.66	4.1	12.81	3.58	4.38	0.08	0.58	0.81	0.07	0.23	0.6
ncbi_101782161	--	1.92	10.26	5.99	17.95	5.52	5.81	1.23	3.51	1.8	0.69	0.71	0.63
ncbi_101768101	--	5.55	43.89	21.85	73.57	14.11	21.3	1.53	8.93	7.11	1.69	0.4	1.3
ncbi_101783984	CYP709B2	159.87	1154.55	602.82	1740.46	423.04	535.37	96.31	181.94	128.83	70.95	64.34	51.49
ncbi_101763568	ACA7	12.64	29.2	27.44	69.64	32.88	14	20.36	17.45	8.22	2.3	2.5	3.15
ncbi_101770168	At1g78530	0.88	1.17	0.73	2.07	0.88	0.68	0.72	0.5	0.3	0.18	0.25	0.39
ncbi_101774980	HSFA2C	61.07	243.83	146.9	300.24	70.91	120.27	131.03	76.15	66.37	56.49	74.33	67.04
ncbi_101771556	--	3.25	40.82	14.77	68.45	4.73	12.94	11.01	3.67	0.95	1.9	2.51	2.19
ncbi_101784390	CYP709B2	5.33	44.97	21.16	65.69	13.21	23.33	14.81	4.3	2.83	2.55	5.44	3.56
ncbi_101753383	--	1.23	6.46	3.17	7.56	2.71	3.05	3.91	1.98	1.34	2.19	0.99	1.55
ncbi_101775555	TOGT1	142.88	426.76	274.49	536	241.88	327.59	277	169.81	154.82	163.17	137.16	151.62
ncbi_101778695	TPS23	31.55	86.77	44.75	134	58.55	37.94	23.52	24.55	6.37	2.48	4.18	3.65
ncbi_101761672	Os07g0190000	16.89	61.9	39.08	109.88	52.33	34.47	19.99	33.05	16.38	5.23	4.1	12.86
ncbi_101765614	ABCG43	10.28	66.22	34	105.83	45.04	38.52	27.54	25.01	18.3	10.02	8.87	10.34
ncbi_101757948	FANCL	3.87	8.18	4.59	13.02	6.77	7.51	5.42	3.8	4.17	2.9	2.91	3.76
ncbi_101782263	JGB	7.36	26.03	11.39	45.47	15.59	24.1	7.03	6.04	4.92	3.01	3.73	4.13
ncbi_101759106	GRC2	151.59	237.22	175.54	344.17	213.26	198	179.5	142.02	131.56	116.76	147.91	130.29
ncbi_101759614	--	7.61	43.36	12.55	76.81	30.83	19.32	1.63	3.59	2.01	0.73	0.81	1.27
ncbi_101786476	ABCB4	6.7	45.25	18.65	82.13	30.26	27.44	9.58	7.8	5.19	3.99	6.89	5.78
ncbi_101758250	GSTU8	1.08	24.19	5.85	33.99	10.06	14.79	7.79	7.34	2.03	2.1	3.43	5.1
ncbi_101766071	CYP81Q32	26.44	207.81	81.02	305.26	122.27	147.68	64.38	64.49	76.72	93.94	59.77	65.61
ncbi_101757668	PCO1	4.91	16.85	6.08	21.25	10.97	9.36	3.16	4.5	4.66	3.7	3.69	3.59
ncbi_101786721	DTX27	101.12	469.98	173.68	659.32	294.35	279.64	56.52	87.08	65.54	79.08	56.77	62.13
ncbi_101782348	RLF	30.22	103.82	49.55	115.95	56.09	57.28	33.06	26.69	22.88	21.6	21.82	21.83
ncbi_101783353	CDC48	144.82	274.3	186.83	291.06	203.71	201.74	144.56	153.81	153.82	154.3	148.57	145.94
ncbi_101776420	FLZ2	5.3	38.07	13.55	47.65	15.8	8.53	5.18	4.52	5.49	5.78	4.45	4.42
ncbi_101767284	ADH1	10.57	31.97	12.7	42.48	14.43	15.07	5.5	6.01	3.8	4.38	2.91	2.33
ncbi_101776753	PDC2	14.32	60.4	16.94	83.56	27.23	27.36	2.26	4.54	5.31	1.91	2.26	2.64
ncbi_101772092	--	30.23	118.09	56.67	142.07	40.14	49.74	15.5	15.91	11.86	14.24	8.37	14.88
ncbi_101778467	FLZ2	15.01	86.68	44.25	119.52	36.13	34.16	11.95	7.92	10.83	6.89	10.8	8.19
ncbi_101759763	MIMI_L728	1.98	6.05	2.5	6.9	6.36	2.17	2.48	1.78	0.57	1.4	2.03	1.79
ncbi_101786592	SAUR32	3.97	27.02	11.85	31.16	22.26	10.94	6.2	3.61	3.18	4.25	7.71	6.27
ncbi_101768885	At2g44130	29.74	84.52	36.21	130.91	105.05	61.97	55.35	28.2	28.83	42.22	46.6	26.75
ncbi_101781736	FLZ13	5.19	18.88	6.88	28.54	19.27	9.5	9.51	6.6	5.26	11.45	11.19	8.75
ncbi_101775529	--	2.22	6.43	4.09	13.66	6.9	5.14	1.69	0.95	1.74	0.71	1.16	1.41
ncbi_101762981	--	5.44	18.64	12.55	32.35	17.21	9.76	2.25	1.39	1.84	0.4	0.2	0.55
ncbi_101779212	Os10g0391300	0.43	1.01	0.43	1.84	1.02	0.49	0.05	0.12	0.11	0.02	0.1	0.09
ncbi_101756330	At5g13200	111.78	185.38	119.97	297.77	151.49	185.01	40.76	28.19	27.69	32.23	29.88	67.69
ncbi_101754875	FIP1	113.98	170.3	129.04	301.69	141.16	143.34	74.21	76.28	51.76	44.21	50.32	67.99
ncbi_101785444	At5g50170	9.2	15.77	9.35	27.31	10.52	13.15	5.73	2.1	1.28	2.21	3.6	4.26
ncbi_101761369	SULTR3;1	175.57	263.82	153.16	307.64	171.41	205.1	67.85	67.96	57.16	121.99	119.16	99.13
ncbi_101760218	CYP707A7	16.62	26.36	23.42	49.69	18.71	30.57	8.47	5.4	5.43	12.46	13.71	13.46
ncbi_105914336	UBI11	428.49	621.23	531.3	850.37	633.78	647.69	339.31	199.7	184.52	380.45	321.05	315.86
ncbi_105914852	UBI11	139	214.17	170.72	296.51	219.35	212.87	114.04	83.4	66.33	136.46	133.35	134.86
ncbi_101784497	PP2B1	3.6	12.81	5.88	11.14	12.98	10.85	11.21	5.53	4.04	4.49	4.3	4.93
ncbi_101756379	CML23	1.44	4.13	1.73	4.81	3.07	3.26	3.2	1.99	1.31	0.74	1.96	1.01
ncbi_101761746	ATL31	0.62	2.84	0.89	2.55	2.22	1.66	1.64	0.63	1.07	0.37	0.61	0.69
ncbi_101777341	--	4.01	10.77	7.31	9.3	9.89	6.76	7.54	7.05	5.31	8.47	4.99	5.06
ncbi_101770549	COR27	0.66	1.98	0.67	1.19	1.23	1.17	0.82	0.94	0.67	0.96	0.46	0.71
ncbi_101781863	ADF2	276.74	538.73	414.28	436.65	435	415.21	306.68	348.65	309.55	330.46	269.57	280.92
ncbi_101759778	At1g51745	19.49	20.76	17.94	20.68	22.7	17.63	15.72	18.6	16.17	16.35	17.32	18.48
ncbi_101781426	CIPK2	198.58	217.22	150.99	232.73	277.02	176.19	161	133.99	117.47	146.16	183.65	137.76
ncbi_101781839	GLR2.9	4.12	5.53	3.62	5.47	5.81	3.49	3.96	2.51	2.35	2.91	3.39	3.83
ncbi_101752466	CID11	64.42	83.87	56.82	95.87	98.52	58.19	71.61	79.44	52.94	51.93	52.96	50.2
ncbi_101764037	PRA1E	5.34	6.37	3.06	7.21	7.09	4.64	5.32	4.77	3.88	2.96	4.3	2.77
ncbi_101784379	RKL1	1.15	1.89	1.22	1.94	1.67	0.96	0.74	1.03	1.22	0.97	0.82	0.45
ncbi_101761192	--	9.86	22.1	9.61	31.07	21.79	15	5.91	7.66	6.58	4.6	4.8	4.43
ncbi_101766750	Os11g0599500	25.89	32.56	23.85	37.03	31.19	28.39	21.53	24.35	24.5	23.28	23.28	21.69
ncbi_101752559	--	2.08	4.34	2.17	8.36	4.93	2.94	0.84	1.76	2.35	0.53	0	0.29
ncbi_101775303	PUB16	7.35	11.18	8.01	16.05	12.21	9.45	4.69	6.47	8.31	2.72	1.59	1.84
ncbi_101779478	YRDC	16.87	15.53	13.74	17.31	14.98	17.2	16.11	17.26	13.74	14.29	14.51	14.21
ncbi_101782868	Os12g0155000	0.39	0.94	0.51	4.4	2.3	3.83	0.99	2.37	1.14	0.41	1.27	1.18
ncbi_101785662	--	0.41	0.19	0.3	1.04	0.53	1.07	0.33	0.62	0.29	0.47	0.16	0.25
ncbi_101760803	At3g08990	10.06	8.63	8.58	16.82	10.44	20.22	13.67	16.87	13.18	8.09	7.05	8.86
ncbi_106804364	PIR7A	0.45	0.39	0.54	0.79	0.65	1.17	0.7	0.98	0.36	0.23	0.29	0.56
ncbi_101782026	--	0.91	0.41	0.09	1.77	0.83	1.8	0.65	0.72	0.19	0.96	0.68	1.17
ncbi_101786215	--	3.56	2.95	1.64	7.02	2.28	7.94	1.83	0.8	0.94	0.61	1.46	2.13
ncbi_101760709	FH6	0.6	0.5	0.53	15.24	3.01	15.49	0.78	0.58	0.31	1.11	1.42	1.66
ncbi_101767095	FQR1	0.04	0.49	0.13	1.31	0.41	1.43	0	0.11	0	0	0.25	0.22
ncbi_105914654	--	0.87	1.6	1.5	2.18	0.88	2.36	1.87	1.98	0.55	1.2	1.16	1.51
ncbi_101755116	--	0	1	0.77	3.04	1.17	2.97	0.86	1.5	0	0	0.16	2.38
ncbi_101780844	--	0	0.26	0	1.16	0.37	0.84	0.4	0.46	0.08	0	0.09	0.72
ncbi_101773715	At5g39865	0.1	0.64	0.15	0.93	0.35	1.1	0.64	0.31	0	0.07	0.43	0.45
ncbi_101770432	NAM-B2	26.56	75.01	38.08	149.95	100.56	115.99	114.66	52.5	27.17	57.36	62.97	77.06
ncbi_101772237	NAC077	3.49	11.28	4.21	17.05	11.15	14.25	13.62	7.14	3.4	8.07	10.48	11.94
ncbi_101783039	IRE1	37.75	43.19	38.29	44.92	38.99	37.63	39.1	40.52	33.39	31.5	38.85	36.65
ncbi_101753014	--	12.44	24.57	10.72	39.63	16.62	20.06	20.68	13.63	4.84	7.7	9.8	14.69
ncbi_101783895	--	194.63	281.91	244.56	306.27	235.01	238.28	258.98	226.92	179.14	195.76	196.28	220.34
ncbi_101774499	ABCB26	57.55	66.61	53.94	72.22	67.24	58.42	82.01	54.31	40.31	47.4	61.72	73.51
ncbi_101769862	PP2A10	24.96	30.9	24.87	31.54	28.13	29.29	31.31	26.7	20.83	21.31	20.94	27.39
ncbi_101786104	CXE15	0.89	1.93	0.87	1.77	1.4	1.46	1.69	0.82	0.53	0.85	0.95	1.7
ncbi_101769667	PSK4	2.57	2.12	2.47	5	2.41	2.37	3.77	1	1.14	1.06	1.36	2.73
ncbi_101767039	--	1.15	0.69	0.81	3.78	1.59	1.9	2.01	0.3	0.13	0.21	0.42	0.19
ncbi_101775583	ABCA2	14.59	15.13	14.2	28.83	21.37	19.57	19.51	12.52	11.86	9.02	11.72	12.53
ncbi_101764715	MGST3	0.23	0.38	0.47	1.75	0.63	0.49	0.78	0.16	0.17	0.32	0.13	0.23
ncbi_101766686	LHT1	11.41	31.06	18.82	73.75	29.81	32.53	53.22	15.16	11.32	4.99	11.89	16.06
ncbi_101770363	UGT73C6	1.95	8.07	6.07	18.08	10.34	8.4	11.78	3.76	2.88	2.45	5.16	4.19
ncbi_101754662	PILS7	6.3	10.58	3.55	21.93	13.81	10.53	14.48	7.21	5.72	8.15	15.07	10.63
ncbi_101784357	NBP35	24.32	44.24	22.52	85.71	70.03	61.08	56.22	34.53	29.35	38.4	59.43	57.68
ncbi_101764661	LACS8	106.27	119.12	114	159.03	126.65	127.17	128.67	115.81	111.49	93.05	124.59	117.29
ncbi_101772703	HAK16	0.3	1.06	0.47	1.61	0.84	1.06	1.14	0.52	0.28	0.23	1.04	0.57
ncbi_101775948	FATB	157.36	277.94	193.65	417.36	261.22	219.08	277.99	150.34	132.67	200.48	298.83	285.96
ncbi_101763947	--	7.29	31.28	16.06	46.61	18.9	29.9	22.83	13.17	10.15	19.35	26.92	22.58
ncbi_101771119	CSY3	113.79	176.46	127.65	208.56	146.69	149.49	127.05	108.56	98.34	126.94	159.95	143.64
ncbi_101765168	Os02g0190300	2.85	7.28	5.52	10.28	5.56	5.76	6.58	2.52	2.65	3.47	4.27	3.7
ncbi_101764942	At1g16060	0.45	1.03	0.52	1.74	1.08	0.99	0.66	0.17	0.3	0.42	0.52	0.47
ncbi_101778090	GSH2	36.35	67.94	55.83	100.87	66.57	66.65	47.34	37.94	30.28	38.55	52.87	48.19
ncbi_101754500	SKP2A	13.48	28.26	15.04	37.91	17.1	17.34	17.37	6.63	9.91	11	16.5	23.95
ncbi_101755760	At3g11320	0.28	1.04	0.41	1.17	0.75	0.45	0.48	0.37	0.44	0.24	0.44	0.56
ncbi_101779686	H0403D02.15	56.63	119.77	65.75	131.31	83.72	72.83	79.6	64.8	53.51	53.72	73.45	70.2
ncbi_101759989	MGL	13.86	13.03	16.22	92.09	82.55	51.97	26.63	16.79	7.8	7.6	5.12	5.06
ncbi_101767199	PAT1	21.37	20.48	22.59	125.92	99.33	73.68	30.73	21.43	13.84	13.66	17.1	16.87
ncbi_101773942	ZIFL2	40.68	52.84	46.59	207.35	161.39	112.42	89.41	68.63	65	35.19	39.65	42.87
ncbi_101780271	--	5.47	13.01	5.05	45.99	36.07	25.97	16.72	8.91	12.61	10.8	8.57	5.62
ncbi_101766027	RPPL1	3.25	4.5	2.57	11.41	8.24	7.43	3.67	3.23	2.73	2.06	2.75	4.38
ncbi_101767691	--	4.53	4.88	7.03	54.7	29.88	28.25	10.17	2.93	2.03	1.41	1.69	2.95
ncbi_101752780	NAC077	14.98	15.32	11.31	53.66	35.61	37.97	18.34	10.77	6.89	5.34	7.81	10.45
ncbi_101785845	--	83.94	144.41	113.67	429.38	297.17	274.22	173.96	118.82	78.06	37.56	68.46	79.16
ncbi_101762903	MST3	4.51	7.37	8.24	47.44	35.55	41.11	10.82	12.15	12.06	8.06	6.41	9.31
ncbi_101758077	AATP1	9.07	22.85	16.74	136.3	108.1	95.79	26.6	28.15	28.05	16.87	11.47	20.83
ncbi_101760597	CARA	103.68	110.9	97.62	320.85	262.1	265.99	128.16	136.58	107.5	90.57	98.87	93.19
ncbi_101776293	ENT3	1.02	0.99	0.5	5.69	4.42	3.33	0.98	1.04	0.97	0.67	1.02	0.96
ncbi_101768354	NIP1-3	3.38	3.82	2.41	32.29	22.89	21.44	3.85	2.6	2.03	2.7	3.17	2.82
ncbi_101772361	YSL12	13.31	26.15	21.22	293.39	216.89	226.23	19.19	14.83	13.29	8.13	10.76	12.64
ncbi_101782777	YSL13	12.72	21.4	17.85	244.09	168.85	173.56	9.9	7.5	7.6	4.75	6.94	7.3
ncbi_101766857	CIPK14	36.9	14.65	16.7	111.12	105.13	73.95	51.87	40.59	22.12	25.89	24.49	31.77
ncbi_101784147	--	10.14	8.89	8.04	21.35	18.19	16.31	13.29	12.14	11.87	8.53	9.15	10.92
ncbi_101785314	RAD52-2	21.18	14.72	14.59	42.91	34.14	33.98	21.83	18.26	17.56	15.46	16.11	20.1
ncbi_101768049	--	0.18	0.73	0.37	4.15	2.58	2.1	0.93	0.72	0.67	0.73	0.8	0.58
ncbi_101781899	--	9.54	18.87	18.99	129.29	77.16	75.6	28.89	35.93	29.51	17.86	17.76	25.93
ncbi_101782299	--	26.03	43.51	46.4	281.41	171.52	166.77	70.64	89.17	67.87	46.82	51.39	75.58
ncbi_101753964	tal	40.45	62.9	40.13	238.64	178.95	167.48	129.73	73.26	62.82	51.08	74	66.77
ncbi_101767995	CBSDUF5	14.73	15.61	13.84	37.29	27.64	27.53	23.48	19.01	16.21	17.52	20.17	19.91
ncbi_105913554	--	0.54	0.45	0.67	2.17	2.09	1.5	0.76	0.78	0.85	0.6	1.13	0.79
ncbi_101769822	IVR1	17.89	15.24	14.18	40	43.18	28	19.78	18.37	17.73	15.31	22.95	16.5
ncbi_101771656	At1g67480	37.76	32.92	30.46	75.64	86.34	64.77	43.69	39.45	39.32	30.49	51.22	34.65
ncbi_101780687	ALPHAC-AD	31.41	34.93	33.71	49.46	48.19	44.38	34.61	38.03	35.15	29.19	35.26	34.91
ncbi_101780727	Bx8	0.22	0.08	0.32	1.61	1.25	1.14	0.42	0.46	0.45	0.04	0.54	0.58
ncbi_101772356	BRG3	0.89	1.64	0.86	2.72	2.46	2.09	0.83	1.13	1.13	0.77	1.15	1.37
ncbi_19526756	psbD	18.91	23.1	16.84	42.28	39.6	33.35	20.92	24.55	20.13	20.36	26.98	26.4
ncbi_101759050	--	0.71	1.13	0.31	3.24	2.68	2.3	0.8	0.34	0.72	1.14	0.68	0.66
ncbi_101764334	--	4.89	11.88	7.59	41.93	40.46	26.84	10.97	5.81	6.07	15.18	10.41	12.38
ncbi_101752701	PSY1R	1.26	1.9	1.45	4.54	3.99	2.46	1.37	1.55	1.46	2	2.08	1.6
ncbi_101772685	--	0.59	1.04	1.29	12.17	8.09	5.9	1.39	0.57	1.43	2.65	2.7	2.68
ncbi_101782750	WDL3	21.87	40.16	24.52	55.32	52.1	50.89	29.15	27.24	27.74	29.81	29.92	26.34
ncbi_101765793	AM1	11.25	15.21	11.08	25.23	22.11	22.8	12.34	11.11	14.1	11.29	13.91	12.72
ncbi_101756069	fray2	26.32	31.94	25.13	50.78	47.73	50.73	25.64	23.73	26.93	25.64	24.83	28.3
ncbi_101766737	ACR9	18.91	32.1	19.32	84.54	66.21	77.57	20.81	20.68	20.73	23.15	24.34	24.11
ncbi_101758375	AAE7	8.49	31.87	13.95	136.98	85.32	104.93	21.8	18.06	16.64	45.39	53.1	52.52
ncbi_101783602	--	21.47	36.52	24.9	79.74	66.93	60.52	31.35	24.58	21.4	32.49	44.03	36.06
ncbi_101767525	UGT79	0.66	5.07	3.14	17.64	10.42	12.53	0.21	2.78	1.38	2.94	2.7	6.72
ncbi_101770668	NCED5	0.4	2.05	0.69	6.65	3.98	3.62	0.82	0.8	0.33	1.54	1.5	1.03
ncbi_101754535	UGE-3	6.17	13.98	7.27	50.45	31.45	31.56	1.94	2.42	1.37	9.63	7.53	12.25
ncbi_101770282	ATL27	0.79	3.05	0.88	12.91	7.48	7.33	1.09	0.49	0.48	0.82	1.64	2.17
ncbi_101752770	IPUT1	24.25	34.15	27.37	48.32	41.28	42.6	33.35	28.87	24.46	26.93	25.89	26.05
ncbi_101785787	CRK3	25.29	37.22	29.06	59.38	54.45	51.67	33.06	29.08	27.59	30.15	27.32	27.1
ncbi_101777825	PID	0.34	0.87	0.54	1.54	1.04	0.97	0.56	0.44	0.37	0.6	0.35	0.6
ncbi_101785404	--	14.69	35.6	20.15	87.69	50.98	47.6	33.67	21.65	18.08	24.79	13.17	14.48
ncbi_101775467	PLP2	0.27	0.44	0.53	1.09	0.98	0.58	0.54	0.28	0.14	0.33	0.42	0.45
ncbi_101775595	SIT2	4.04	11.88	6.41	18.36	18.13	11.83	8.11	5.83	3.55	5.07	9.14	6.34
ncbi_101778980	DGAT2D	27.96	42.77	26.84	66.97	56.04	41.53	26	20.32	15.21	22.55	28.52	30.3
ncbi_101779433	RSH3	0.73	2	1.22	5.93	3.4	3.5	3.13	2.18	1.19	1.58	1.16	2.78
ncbi_101756146	NAPRT2	9.91	8.43	6.92	37.36	26.22	24.35	27.98	14.7	9.63	16.78	16.16	15.59
ncbi_101776055	PANC	3.39	4.02	3.02	11.06	8.4	7.17	7.99	5.81	4.43	5.73	5.47	5.77
ncbi_101778652	NAC087	32.43	59.06	32.96	142.95	92.26	80.2	99.9	50.39	31.71	63.25	53.89	50.44
ncbi_101782005	At1g34300	2.96	5.64	4.35	16.6	10.86	9.05	8.52	6.41	4.63	6.31	6.59	6.52
ncbi_101764507	--	0.68	0.63	0.48	1.8	1.62	1.79	1.26	0.57	0.46	0.97	1.01	1.29
ncbi_101770051	PAM16L2	9.71	12.36	10.38	27.12	25.02	23	15.28	11.66	12.68	14.63	18.01	17.86
ncbi_101780652	gtf2a1	48.31	53.71	48.4	69.52	68.44	66.96	57.66	50.26	51.12	56.63	53.47	56.64
ncbi_101757046	HMGS	9.99	12.07	10.8	23.1	21.02	23.61	13.7	13.69	9.9	13.89	15.46	12.04
ncbi_101765219	RGA5	0.52	0.87	0.5	3.03	2.65	3.3	1.67	0.99	0.74	1.74	1.26	1.11
ncbi_101777150	At3g14460	15.59	25.36	14.21	38.5	40.49	44.21	26.78	16.81	16.01	22.35	26.27	25.22
ncbi_101754228	H2B.11	2.15	3.87	1.63	7.68	6.01	6.64	4.08	1.91	2.02	2.12	3.54	3.15
ncbi_101784026	At1g66480	4.58	8.51	5.17	17.8	15.93	14.91	8.59	5.17	2.68	5.64	7.04	6.85
ncbi_101759708	VAMP725	2.7	6.33	4.39	15.02	11.17	11.71	7.61	5.9	4.59	2.74	3.13	4.96
ncbi_101786044	--	0.94	4.5	2.18	19.14	10.51	12.39	7.63	6.23	4.98	0.95	1.72	3.02
ncbi_101755927	TBP2	3.35	7.31	4.58	15.11	11	12.14	8.43	7.59	6.35	5.3	3.77	3.96
ncbi_101762245	At1g09390	11.63	16.54	13.35	28.93	23.15	27.66	20.48	16.02	17.08	12.04	10.68	11.79
ncbi_101778838	PUB21	1.63	3.55	2.7	7.32	6.07	5.96	4.16	2.81	2.66	0.89	0.49	2.72
ncbi_101771127	--	0.06	0.32	0.17	1.5	1.19	0.97	0.63	0.07	0.37	0.08	0	0
ncbi_101756203	DCL2A	2.6	3.53	2.94	6.38	6.51	5.51	4.34	3.37	3.68	2.26	2.94	2.7
ncbi_101759577	P4H9	5.22	6.76	5.49	13.62	12.94	11.43	9.81	6.85	7.63	3.92	4.29	4.16
ncbi_101768332	AMT1-1	72.74	83.58	84.8	116.82	109.78	108.43	103.1	83.24	84.04	87.49	85.09	76.95
ncbi_101771418	MES11	2.09	2.28	2.1	4.92	3.81	4.27	3.89	2.28	2.61	1.33	2.22	1.51
ncbi_101757794	--	1.11	1.99	1.57	4.53	4.38	3.55	3.76	1.6	1.52	0.53	0.48	0.37
ncbi_101755555	--	16.9	19.96	15.89	49.9	49.38	49.54	46.22	22.51	11.07	5.8	7.22	6.03
ncbi_101756917	PFK3	127.3	159.74	152.84	257.76	240.52	265.24	247.49	162.2	147.8	119.59	114.15	124.74
ncbi_101765457	--	87.58	159.33	159.45	425.31	228.86	356.72	177.81	109.68	82.74	63.59	46.76	76.71
ncbi_101775179	RLP22	0.24	0.13	0.24	1.08	0.64	0.9	0.37	0.14	0.15	0.11	0.06	0
ncbi_101785397	WRKY72B	0.37	0.9	0.39	2.08	1.35	1.67	1.22	0.18	0.22	0.15	0.22	0.14
ncbi_101771445	JAMYB	12.77	28.53	13.37	64.98	44.06	45.62	17.67	11.01	7.4	8.13	7.33	7.65
ncbi_101769616	At1g14600	40.92	65.96	45.47	135.71	88.74	102.4	64.3	36.1	33.32	28.28	29.47	43.46
ncbi_101784079	SALR	1.73	4.84	2.26	11.81	8.3	8.9	4.52	1.08	0.38	0.83	0.56	1
ncbi_101754069	TPX2	1.35	1.65	1.4	2.88	2.07	2.71	1.86	1.49	1.55	1.46	1.28	1.9
ncbi_101767836	At1g63850	1.74	2.22	2.19	6.1	4.48	5.91	3.49	2.5	2.76	2.4	2.98	2.64
ncbi_101763423	NPF8.3	0.2	1.26	0.95	7.13	5.61	8.04	1.94	1.06	0.95	0.55	0.4	0.49
ncbi_101780235	At1g67340	1.1	2.3	1.18	6.5	5.08	6.67	3.32	1.67	1.34	1.28	0.96	1.57
ncbi_101758459	UBP8	4.08	5.3	3.38	11.5	11.05	11.77	7.39	4.86	4.91	4.29	4.41	3.61
ncbi_101769412	ERMP1	23.45	27.56	24.71	34.93	33.08	33.57	30.16	25.92	24.25	24.29	25.27	24.93
ncbi_101782891	GOS11	33.87	36.28	30.31	45.11	45.96	45.31	41.21	35.3	31.11	30.98	28.99	31.47
ncbi_101777228	rab3gap1	10.41	14.32	10.92	19.51	22.9	25.04	17.34	12.48	10.21	10.09	10.48	12.17
ncbi_101784524	DTM1	16.68	25.29	13.22	46.17	42.13	55.39	31.72	19.06	11.24	19.05	13.72	15.81
ncbi_101774751	CHIT3	1.05	0.9	0.61	1.8	1.56	1.55	1.21	0.97	0.58	0.68	0.89	1.19
ncbi_101777700	Os09g0297000	50.07	49.15	42.75	73.45	74.45	70.81	60.8	45.37	38.41	48.84	47.07	45.39
ncbi_101775125	SAPK1	117.78	102.3	72.52	182.15	178.67	168.94	113.62	87.46	76.16	91.15	87.24	93.92
ncbi_101758075	CAT2	28.88	24.37	20.22	66.14	53.68	57.46	33.37	16.82	18.77	16.49	18.33	20.83
ncbi_101761948	GSDA	22.04	13.98	10.43	66.63	58.89	51.34	26.2	6.64	5.58	10.45	11.9	13.64
ncbi_101778503	COR413PM1	117.28	61.85	62.09	137.15	123.66	109.18	106.54	86.82	77.28	85.65	92.25	87.54
ncbi_101784061	hbdA	26.62	20.82	20.14	32.01	27.9	27.27	30.16	23.36	20.59	21.14	21.69	21.2
ncbi_101777925	--	6.06	4.53	4.26	9.08	7.46	5.22	8.54	4.4	3.35	5.56	6.09	5.34
ncbi_101757936	--	2.6	1.73	2.48	7.14	6.16	4.29	5.9	2.01	0.85	2.37	1.83	4.25
ncbi_101767915	SAP9	74.42	74.22	72.97	97.37	89.42	78.87	88.15	67.91	70.6	72.58	71.52	73.48
ncbi_101763614	Os04g0670200	1.66	0.67	1.1	2.57	1.95	2.13	1.62	1.07	0.71	0.99	1.37	1.38
ncbi_101776513	GSTU6	3.67	1.92	3.18	6.52	4.44	5.08	4.39	3.68	2.35	2.19	2.5	3.97
ncbi_101752544	ZIP5	0.33	0.09	0.43	1.33	0.56	0.53	0.1	0.11	0	0	0.19	0.31
ncbi_101753771	MYB3R-2	6.5	4.49	6.71	11.27	8.78	8.66	6.12	5.71	3.67	4.68	8.04	7.33
ncbi_101768930	PCMP-H69	0.48	0.28	0.05	0.67	0.67	0.31	0.29	0.4	0.07	0.05	0.13	0.35
ncbi_101785316	--	5.34	5.01	5.11	8.43	7.76	6.69	7.14	7.06	3.63	3.99	4.66	7.59
ncbi_19526784	rps4	0.49	1.07	0.52	0.08	0.96	1.09	0.11	0	0.45	0.19	0.4	0.44
ncbi_101782278	algC	4.74	9.19	6.02	4.71	4.89	7.08	1.22	1.7	2.97	4.54	3.3	2.24
ncbi_101784845	--	8	11.05	7.12	2.43	4.7	8.24	0.73	1.85	1.13	2.65	2.7	4.34
ncbi_101777093	At2g32040	3.09	3.59	3	2.72	3.96	2.95	2.57	3.24	2.56	2.71	2.53	2.35
ncbi_101774354	TLP1	1.22	1.44	0.98	1.02	2.06	0.79	0.05	0.54	0.13	0.1	0.25	0
ncbi_101767338	--	23.79	25.38	23.31	22.53	26.54	23.71	19.37	21.91	21.79	20.09	19.6	20.57
ncbi_111258144	--	5.3	6.08	4.72	4.97	7.24	5.67	3.07	4.46	3.58	2.36	3.42	3.14
ncbi_101783259	CBL7	20.65	19.89	24.29	15.9	26.98	17.38	2.01	10.52	12.45	17.02	12.54	7.65
ncbi_101765068	SIT1	2.36	2.61	3.18	2.04	3.42	2.81	0.53	1.24	1.5	1.32	1.31	1.2
ncbi_101779822	ACT7	0.76	1.19	1.05	0.77	1.74	0.91	0.04	0.16	0.4	0.51	0.26	0.1
ncbi_101779473	HERK1	53.34	53.83	54.93	52.52	63.31	45.53	41.08	38.47	40.9	42.22	32.09	39.61
ncbi_101780654	FAH1	1.91	1.95	1.73	0.96	2.75	1.35	0.49	0.77	1.08	1.22	0.3	0.71
ncbi_101768168	--	31.07	19.46	32.42	16.16	33.37	28.17	16.05	19.15	20.85	24.13	14.3	12.71
ncbi_101776477	RRT3	2.42	1.52	3.17	1.98	2.78	2.1	0.85	1.07	1.49	2.25	1.47	1.18
ncbi_101776020	Os10g0391300	2.65	1.78	2.68	2.02	2.74	2.2	1.56	1.17	1.28	1.16	1.29	1.19
ncbi_101775668	CAT8	1.76	0.71	1.46	0.87	1.68	1.17	0.25	0.34	0.73	0.4	0.2	0.49
ncbi_101758683	ARF4	310.34	247.53	313.21	222.35	311.21	297.4	156.8	189.65	205.76	184.31	159.59	161.02
ncbi_101784936	WAK5	2.98	1.36	3.27	1.19	2.41	2.17	0.13	0.65	0.56	0.35	0.34	0.53
ncbi_101781825	--	0.55	0.32	1.1	0.38	0.7	0.18	0	0.08	0.05	0.03	0	0
ncbi_101752661	MLO4	2	0.86	2.41	1.13	2.21	1	0.52	0.75	1.17	0.73	0.52	0.12
ncbi_101786232	XTH8	43.17	24.63	57.55	21.1	49.64	23.21	5.01	19.13	27.66	2.26	2.1	2.87
ncbi_101758808	At1g55660	22.4	19.75	21.35	20.94	18.85	19.49	8.84	9.73	9.2	9.31	13.41	12.87
ncbi_101779464	ARID2	18.7	16.33	17.9	16.12	16.99	17.23	11.87	11.68	10.07	12.92	14.55	11.98
ncbi_101771344	HULK3	56.31	52.47	58.97	45.62	53.65	54.98	27.25	31.31	33.5	29.99	30.99	33.45
ncbi_101784618	--	2.96	2.93	3.12	1.37	2.74	2.94	0.1	0.29	0.24	0.17	0.27	0.47
ncbi_101761541	HK6	7.83	6.84	9.68	6.44	8.43	9.67	1.09	2.57	2.74	2.15	2.1	1.74
ncbi_101775502	TRAF1A	56.58	51.66	58.12	48.59	58.62	56.05	34.58	40.08	40.13	38.77	38.9	39.76
ncbi_101754344	MTB1	17.5	17.28	16.05	16.93	19.57	17.58	9.31	9.47	9.87	10.15	11.46	11.08
ncbi_101768811	smek1	62.73	61.48	61.03	59.82	62.23	60.97	50.01	48.11	50	50.33	53.27	50.8
ncbi_101755558	FLAD1	55.4	49.67	49.93	51.41	56.43	54.37	21.94	24.34	25.4	26.35	24.09	25.17
ncbi_101763111	Os03g0268000	68.64	60.32	62.22	57.38	67.38	69.19	31.02	39.45	33.29	36.33	29.9	34.21
ncbi_101779570	DI19-1	648.89	523.28	541.55	482.72	566.67	647.12	178.49	189.55	215.43	246.65	177.81	198.07
ncbi_101757102	SYP132	33.78	25.98	21.69	25.01	32.67	30.8	5.87	9.94	10.63	7.4	8.09	9.26
ncbi_101782216	NPF4.4	20.84	14.08	14.41	16.25	17.25	18.11	1.51	5.17	3.93	4.35	4.71	4.95
ncbi_101780722	CSLH1	8.22	5.94	5.66	7.39	9.41	8.33	1.73	2.35	3.32	5.48	3.12	4.04
ncbi_101764175	CDKF-4	171.49	147.51	149.87	145.5	188.08	172.27	108.28	114.52	114.56	126.86	112.77	121.72
ncbi_101779273	--	52.46	38.76	31.86	41.42	54.62	50.12	17	18.37	16.99	24.49	21.81	21.17
ncbi_101779858	DGK1	50.71	46.92	24.35	41.69	57.92	50.04	1.67	2.16	1.59	1.86	2.09	2.94
ncbi_101779940	--	20.7	15.74	9.83	11.28	20.93	17.43	4.08	3.26	4.67	3.76	5.71	6.39
ncbi_101764491	COPT1	32.95	30.93	25.43	27.19	32.13	33.35	18.05	18.61	19.51	23.24	16.73	23.39
ncbi_101770109	-	49.22	38.24	35.62	32.24	47.43	49.62	14.83	12.97	15.43	19.86	14.68	15.8
ncbi_101774258	CP29B	313.29	239.12	204.29	160.07	249.49	312.89	30.6	49.7	63.18	116.68	55.71	69.71
ncbi_101773142	ATL11	2.32	1.61	1.54	1.21	2.38	1.44	0.25	0.47	0.87	0.59	0.78	0.49
ncbi_101758612	At3g50520	53.84	37.22	45.84	38.04	67.28	41.33	11	20.9	24.46	13.74	10.2	8.59
ncbi_101765568	FPS	150.51	110.41	140.75	119.06	174.77	97.08	32.43	52.62	46.18	43.11	39.28	32.72
ncbi_101773551	CKI1	20.89	14.06	18.65	17.67	23.05	15.81	7.65	9.37	11.66	9.72	8.53	9.65
ncbi_101776238	--	18.15	15.89	15.02	15.82	18.14	15.03	9.43	11.62	11.69	11.55	12.88	13.42
ncbi_101761660	--	101.78	91.07	99.33	92.32	103.48	91.13	65.68	73.67	83.21	80.14	75.48	82.15
ncbi_101775374	--	21.67	15.01	18.09	12.92	19.76	17.85	2.43	7.7	8.18	10.3	8.08	8.8
ncbi_101755333	-	17.18	20.2	19.29	13.96	16.81	16.25	8.64	10.88	11.41	9.76	13.09	13.46
ncbi_101753457	BRM	41.18	40.47	46.89	36.4	42.12	40.55	21.51	22.22	29.8	24.4	30.28	29.88
ncbi_101780568	VPS13C	15.8	16.79	18.66	14.34	15.64	15.85	6.78	8.39	9.55	8.39	13.37	12.05
ncbi_101781435	PHOT1A	19.47	31.79	25.78	21.9	21.02	27.74	4.55	7.44	12.61	10.85	10.89	14.8
ncbi_101753513	SPP	115.1	144.36	129.52	110.85	128.97	123.44	64.79	77.49	78.17	90.26	102.09	98.18
ncbi_101785883	--	123.27	161.97	159.92	130.8	146.49	146.04	76.34	81.4	91.59	101.08	103.85	98.25
ncbi_101753519	U2AF65B	38.06	39.95	36.65	31.64	40.85	38.99	22.77	24.01	30.18	29.58	35	32.03
ncbi_101763018	ATXR3	30.74	31.88	31.76	31.66	35.94	31.15	22.98	23.81	28	26.29	27.94	30.07
ncbi_101756586	BTAF1	30.22	29.72	29.94	31.78	39.3	34.33	15.47	17.16	20.52	21.16	25.5	26.08
ncbi_101761923	--	57.19	60.18	58.81	56.97	70.58	62.71	42.04	44.49	47.25	51.48	52.87	52.39
ncbi_101757669	LPA3	34.99	33.85	39.97	21.27	34.59	31.21	12.11	16.76	21.85	31.08	24.86	21.27
ncbi_101759340	BGLU10	19.07	21.29	26.95	14.74	18.56	18.91	3.35	7.78	9.49	16.29	15.24	6.73
ncbi_101759656	FKBP16-4	33.84	47.94	48.94	29.71	36.99	32.4	10.9	17.37	24.43	31.78	32.65	26.58
ncbi_101760933	PPDK1	6064.76	6406.11	7440.09	4963.91	6411.44	6329.83	2131.85	3452.11	4086.91	5656.36	5978.79	5369.16
ncbi_101767929	carC	48.52	51.65	65.51	36.04	49.27	43.81	12.82	21.61	28.88	40.38	39.09	41.08
ncbi_101782050	--	22.6	21.43	25.32	17.82	20.63	19.65	14.45	16.08	18.88	16.08	19.38	18.72
ncbi_101784004	CHR28	19.01	18.68	21.51	16.22	19.48	17.1	13.72	16.03	16.13	14.94	16.22	16.23
ncbi_101761685	--	22.54	22.8	28.68	23.92	23.57	22.85	14.23	16.6	21.23	18.8	19.59	17.52
ncbi_101765055	TPP2	29.98	28.68	33.92	25.81	27.32	30.35	16.45	22.1	26.16	20.78	21.48	24.23
ncbi_101756490	VAC14	56.84	52	63.29	49.97	57.51	62.25	38.27	38.83	36.78	40.83	41.56	43.06
ncbi_101762729	At2g16365	38.55	27.64	52.96	32.46	48.86	57.73	8.12	11.36	13.22	14.26	18.59	15.8
ncbi_101778793	--	34.8	31.41	44.1	24.48	33.2	34	16.65	18.31	18.08	20.27	23.41	21.82
ncbi_101779803	HIT4	2.57	2.17	3.36	2.41	2.38	2.71	1.12	1.73	1.63	1.22	1.92	1.71
ncbi_101772301	PSS1	1.16	2.29	2.79	2.08	2.11	2.31	0.86	0.75	1.18	1.59	1.31	1.02
ncbi_101764529	--	24.08	23.18	27.65	24.9	26.58	25.82	13.61	13.8	12.76	19.07	15.64	16.31
ncbi_101775030	STR11	3.69	2.43	6.05	5.29	5.55	5.66	0.34	0.44	1.45	2.85	1.56	0.46
ncbi_101770012	--	2.84	2.91	2.44	3.41	3.7	1.85	1.78	2.39	2.63	3.19	2.3	2.49
ncbi_101777002	--	6.62	6.77	6.64	7.35	6.92	5.67	5.57	4.92	6.37	6.74	6.05	6.41
ncbi_101765169	--	360.85	393.05	356.25	406.94	419.99	344.67	351.94	319.08	293.83	363.81	283.25	384.55
ncbi_111255841	Os03g0832400	10.69	11.32	10.66	12.06	10.9	9.43	8.47	10.42	9.25	10.66	8.06	10.42
ncbi_101759316	PCMP-H81	4.07	1.85	4.45	4.7	4.04	5.05	0.59	1.71	1.25	3.79	2.2	3.37
ncbi_101778170	HIR1	127.42	138	167	179.52	206.23	174.9	67.46	75.04	71.01	120.97	84.17	120.83
ncbi_101760543	CNGC1	39.15	37.92	40.79	43.81	46.83	46.88	14.69	19.4	19.08	28.68	30.52	33.1
ncbi_101772907	FKFBP	81.29	78.15	96.05	82.53	103.16	93.97	29.28	31.93	25.61	53.5	54.8	83.68
ncbi_101757826	ADC1	414.86	447.67	432.94	406.04	398.18	383.38	279.69	294.83	282.3	407.15	276.49	422.06
ncbi_101784875	--	161.76	171.2	176.21	164.91	158.37	195.39	121.63	125.49	126.7	187.43	143.82	176.47
ncbi_101769614	GL1-3	17.14	14.43	8.53	8.46	7.24	8.56	2.55	5.07	3.43	11.42	6.05	13.06
ncbi_101776398	MYB306	7.91	5.59	3.4	4.36	3.84	5.17	1.1	2.2	2.06	4.94	2.91	4.77
ncbi_101774721	HOL3	14.6	10.32	9.28	10.76	11.88	10.04	6.03	4.43	5.94	8.57	8.04	10.25
ncbi_101775486	PECT1	60.59	49.27	34.46	53.5	51.37	52.2	32.12	31.03	27.66	44.09	33.43	45.54
ncbi_101765987	--	3.05	1.22	1.69	2.04	1.85	2.08	0.88	0.5	0.73	2.11	0.72	0.95
ncbi_101778030	PRP1	8.88	6.28	6.5	6.87	7.56	6.37	3.33	4.18	5.23	8.03	2.06	5.44
ncbi_101760665	PSRP1	17.69	12.48	12.21	15.74	17.16	17.14	6.76	12.41	13.83	21	12.22	15.89
ncbi_101779908	--	7.89	6.19	3.26	8	9.73	6.2	2.16	4.51	3.55	9.2	4.08	5.98
ncbi_101784360	GALT31A	9.05	10.21	16.83	7.2	12.22	13.52	2.13	4.23	6.25	1.98	1.75	2.29
ncbi_101752481	UBP21	80.42	88.18	104.01	77.85	85	102.06	17.93	38.12	40.81	15.47	12.28	13.71
ncbi_101779006	At1g26850	28.34	35.49	42.98	25	34.91	36.86	4.54	10.84	9.03	2.48	1.2	1.77
ncbi_101779513	ASHH2	18.98	21.53	27.41	22.2	26.78	25.34	7.28	9.43	10.57	6.21	6.61	6.63
ncbi_101781876	Os08g0126700	8.84	11.31	13.47	10.81	12.54	14.05	0.76	3.36	4.77	2.17	1.3	2.65
ncbi_101771152	--	1.34	1.18	1.6	1.09	1.87	1.64	0.06	0.98	0.47	0.15	0	0.75
ncbi_101771434	CRK29	86.29	97.98	103.6	87.86	100.38	87.24	29.18	49.24	49.08	7.65	6.29	46.1
ncbi_101785885	NAC078	309.15	295.86	335.22	308.61	335.8	336.26	243.18	273.59	281.18	196.02	194.89	257.98
ncbi_101779129	--	7.19	7.88	8.99	8.06	9.6	7.5	6.5	5.17	5.45	5.15	5.86	6.96
ncbi_101754536	-	25.14	25.72	26.63	26.75	27.7	26.8	18.91	20.48	21.12	17.8	22.07	20.33
ncbi_101769141	PATROL1	35.28	34.88	38.44	37.18	38.73	35.89	25.97	29.33	31.64	26.42	31.42	30.17
ncbi_101776231	TKL-2	47.75	44.54	58.23	49.24	39.99	43.05	7.43	8.72	7.16	6.13	7.24	6.04
ncbi_101755044	GA2OX6	110.15	107.47	143.87	100.7	87.22	98.22	24.65	33.9	32.33	1.51	0.43	0.92
ncbi_101786051	SRF3	58.86	51.28	71.87	48.91	47.83	45.93	12.53	19.37	23.23	5.87	7.24	5.55
ncbi_101753570	OsI_29993	8.52	7.19	11.28	8.27	8.88	8.13	2.46	2.47	3.45	0.46	0.84	0.91
ncbi_101782141	--	45.72	44.21	58.08	49	45.31	47.87	26.63	28.41	31.98	24.85	25.65	28.85
ncbi_101767341	ASIL2	38.86	37.92	42.18	42.73	35.59	49.32	22.4	23.79	22.76	16.11	13.65	16.81
ncbi_101782384	ASIL2	41.3	49.27	50.89	46.77	37.93	53.83	25.59	28.37	25.05	16.22	13.72	17.88
ncbi_101759263	At1g74360	137.01	186.3	183.78	195.95	166.02	185.42	73.1	85.71	81.23	41.16	27.92	50.5
ncbi_101770217	GALT5	100.35	147.26	139.1	148.53	118.19	152.56	52.58	54.71	47	15.59	11.69	20.32
ncbi_101764949	SD18	56.62	78.41	85.01	68.19	60.11	79.1	19.67	26.46	22.38	8.65	3.92	7.2
ncbi_101771141	At3g25290	257.33	371.74	375.33	355.4	269.2	364.52	114.21	145.43	135.56	97.11	79.25	82.41
ncbi_101756004	CLPD1	1698.05	2406.49	2544.86	2529.76	1906.67	2345.75	784.68	862.5	816.9	291.58	335.02	404.07
ncbi_101778572	Sec11c	45.47	61.84	65.33	61.8	51.11	60.54	18.07	24.82	23.85	10.3	9.03	15.86
ncbi_101757634	UEL-2	223.29	257.18	276.58	249.69	254.76	240.28	114.05	136.42	150.8	54.11	46.65	53.33
ncbi_101775131	ABCB6	54.97	63.63	66.53	64.93	63.81	56.64	31.53	40.21	40.36	23.47	25.35	25.61
ncbi_101755212	CHR28	16.42	19.78	21.61	20.99	21.74	19.7	10.51	11.79	13.36	7.56	8.04	9.49
ncbi_101754305	MAPKKK5	124.76	146.06	156.69	147.83	164.58	137.75	49.26	70.93	74.82	40.61	34.59	36.11
ncbi_105913509	RPM1	11.06	13.82	14.17	12.38	14.26	13.07	5.5	8.09	7.99	4.59	4.64	5.11
ncbi_101778453	At2g16250	114.97	146.91	150.77	174.41	153	162.88	52.89	68.48	76.86	13.86	10.54	19.8
ncbi_101768792	AGD7	123.44	144.33	146.21	165.69	145.65	155.74	71.56	71.92	73.5	50.82	37.28	53.07
ncbi_101774588	At1g55270	19.34	23.15	22.33	25.66	22.03	23.56	11.88	12.69	13.04	8.31	7.55	8.53
ncbi_101771251	GST3	1557.3	2153.9	2251.1	2943.79	2412.48	2200.4	423.91	697.4	670.21	223.25	114.73	130.6
ncbi_101755919	RBOHF	21.55	26.79	26.21	29.26	25.61	25.05	5.83	10.18	10.77	3.62	3.88	4.04
ncbi_101758538	--	92.14	105.61	114.38	120.76	112.31	111.71	33.56	40.27	44.01	17.17	19.44	17.65
ncbi_101785773	DAR1	37.33	51.37	51.39	55.89	45.93	45.42	29.32	25.15	25.2	14.52	16.46	17.04
ncbi_101754991	UBC34	96.92	120.42	103.83	120.2	105.6	102.47	60.62	64.88	63.23	46	40.63	44.02
ncbi_101774764	YPTM2	95.33	116.5	109.09	128.33	100.12	97.71	28.85	39.71	36	18.5	16.54	18.83
ncbi_101785141	BC10	78.05	107.47	93.62	117.53	98.43	92.43	28.1	38.92	34.69	16.48	19.21	26.91
ncbi_101779162	nep1	20.57	18.14	33.83	32.91	31.3	29.32	13.18	9.96	5.67	4.73	4.66	10.57
ncbi_101776749	TOL9	39.68	39.43	41.57	46.27	43.3	38.98	30.6	29.05	27.52	26.16	27.89	26
ncbi_101765837	HT1	17.89	16.76	22.93	22.74	23.08	17.61	9.23	8.79	9.86	2.66	2.94	3.84
ncbi_101783156	TPS2	21.2	20.83	36.83	35.8	32.81	20.69	6.07	9.31	8.32	1.42	1.19	0.84
ncbi_101762269	GAUT7	6.43	6.18	7.79	7.6	5.88	4.92	2.31	3.45	3.22	2.29	2.65	2.94
ncbi_101755992	GSVIVT00026920001	8.82	11.05	12.16	13.83	7.73	8.92	1.34	2.77	3.69	1.13	2.19	1.78
ncbi_101772310	TPS7	107.7	112.81	126.47	159.82	112.36	103.27	37.34	52.67	49.09	42.71	47.86	56.46
ncbi_101757574	CIN3	0.88	0.47	1.08	1.21	0.84	0.76	0	0.06	0.03	0	0	0
ncbi_101775375	BON3	20.42	18.23	29.97	26.85	17.63	16.21	8.75	4.87	3.38	3.16	4.38	6.04
ncbi_101756467	WRKY34	43.41	28.61	62	49.6	57.55	47.09	5.29	5.67	3.66	0.56	1.65	0.9
ncbi_101759514	Os02g0799000	131.64	107.43	157.46	142.5	147.55	145.66	51.81	59.62	62.66	49.29	60.33	48.68
ncbi_101760866	At4g16820	41.97	30.14	47.67	35	40.31	45.17	6.44	7.99	9.4	2.03	1.9	3.78
ncbi_101780979	YAK1	54.49	50.31	61.14	52.54	58.31	54.44	27.3	25.54	27.51	22.59	25.24	26.41
ncbi_101764976	trc	161.85	159.48	177.17	166.03	198.2	166.87	107.67	109.32	116.32	92.19	93.19	85.42
ncbi_101769478	PI4KG4	210.5	221.37	241.87	226.18	278.25	224.39	128.95	148.94	156.7	132.2	125.27	138.62
ncbi_101765034	CRK6	26.07	22.66	37.73	25.76	34.34	32.77	4.44	12.33	12.95	3.31	1.83	5.09
ncbi_101766777	RPPL1	9.1	9.09	11.62	11.44	11.38	10.86	3.82	6.52	6	3.66	3.63	4.36
ncbi_101784320	EIL1A	243.91	240.26	246.09	275.2	285.65	266.81	185.71	180.36	174.8	185.44	143.77	173.25
ncbi_101769297	EXO70A1	53.92	52.28	58.49	57.29	68.04	63.49	9.06	9.88	9.94	5.66	5.87	7.9
ncbi_101778213	At1g34470	26.93	27.03	26.8	31.18	37.54	34.62	6.58	8.32	8.44	6.87	4.68	5.76
ncbi_101772138	RFS6	129.37	121.94	131.5	144.42	143.68	149.63	66.37	55.96	58.42	52.52	37.72	44.76
ncbi_101776188	DNAJ1	426.27	382.95	386.64	420.37	454.05	480.17	202.84	199.89	245.94	211.48	165.11	177.61
ncbi_101773397	PTI11	26.22	19.37	29.58	27.98	35.43	29.84	6.84	11.43	12.43	7.13	5.51	7.64
ncbi_101782828	DPB	5.72	4.91	6.24	7.07	7.09	6.81	2.84	3.48	3.55	3.62	2.63	2.72
ncbi_101782923	UGE-1	1481.45	1076.86	1515.99	1600.75	1653.07	1751.77	536.99	503.32	505.71	471.55	355.63	441.68
ncbi_101782412	BSPA	7.38	6.07	6.76	8.92	11.01	7.72	1.9	3.18	1.53	1.05	0.77	1.34
ncbi_101755278	RR21	57.45	46.8	56.86	57.65	73.33	64.8	27.41	29.74	28.71	27.94	29.56	26.75
ncbi_101778795	Mindy1	30.15	25.09	28.99	31.19	38.24	35.56	16.27	16.81	14.05	13.61	15.85	13.16
ncbi_101757484	--	27.03	28.19	30.38	28.54	31.99	29.1	19.15	16.88	14.89	11.47	11.72	15.02
ncbi_101755645	LEA14-A	1201.58	945.95	1233.81	1175.33	1194.74	1172.4	406.49	529.4	544.85	199.27	115.71	213.81
ncbi_101773815	PPD7	135.94	121.5	120.53	136.4	134.47	125.7	54.06	62.99	59.96	20.89	20.33	25.35
ncbi_101784821	Os01g0693900	26.27	21.97	21.57	24.12	26.83	25.36	12.84	14.25	10.8	7.26	8.67	8.56
ncbi_101786115	AIP2	29.91	25.32	27.68	29.81	30.31	27.79	19.93	17.03	16.65	13.13	15.09	14.89
ncbi_101762982	EDR1	60.08	56	63.2	65.63	68.29	63.93	26.39	34.5	38.27	27.83	27.31	28.61
ncbi_101773466	--	26.71	24.28	26.6	29.71	30.31	28.27	12.62	16.36	15.07	10.77	9.82	8.14
ncbi_101771463	UPTG	2323.6	2008.39	2328.41	2679.59	2838.99	2897.63	627.62	919	937.43	321.86	173.49	239.37
ncbi_101779964	--	545.85	487.5	502.38	600.42	678.39	589.06	183.34	228.23	246.14	121.52	73.75	125.24
ncbi_101760380	ALB4	96.8	113.84	124.71	127.07	145.4	125.18	52.35	61.22	58.42	33.65	32.81	30.1
ncbi_101783033	-	37.4	41.85	41.99	43.6	50.07	44.93	24.8	27.4	26.8	23.03	22.05	22.72
ncbi_101763417	TSN1	177.69	204.81	206.06	237.61	235.9	235.91	85.98	106.72	119.67	75.34	69.66	70.08
ncbi_101770228	PATROL1	32.56	35.23	36.39	41.09	42.59	43.06	15.43	17.63	15.03	9.7	12.64	12.51
ncbi_101758098	IFRD2	59.85	68.65	65.59	67.82	74.34	67.96	36.33	35.61	36.07	33.93	35.35	35.41
ncbi_101775475	ILK1	146.44	172.17	179	174.15	183.88	173.16	22.85	29.34	30.42	12.6	10.06	10.36
ncbi_101764728	DRP2A	61.38	65.38	65.68	68.8	71.84	67.56	44.25	43.51	45.43	38.48	45.34	41.84
ncbi_101779493	At4g12770	25.33	28	28.21	28.01	30.03	28.58	15.07	15.37	18.25	13.73	15.25	14.41
ncbi_101763251	MYB306	1.36	1.5	1.18	1.34	1.78	1.36	0.37	0.45	0.45	0.21	0.14	0.02
ncbi_101780041	dcun1d4	74.99	80.47	76.9	82.25	84.99	82.58	34.45	42.93	46.24	35.28	32.36	22.96
ncbi_101753072	PAO4	1697.35	1517.1	1451.57	1413.79	1825.99	1525.87	806.79	911.05	1024.38	547.28	376.55	475.64
ncbi_101756423	NUDT8	399.38	308.54	369.85	289.39	464.93	378.39	94.43	188.14	219.24	97.76	33.66	68.38
ncbi_101766159	NOI4	55.95	46.9	52.38	44.96	57.88	53.55	37.66	40.95	37.17	28.09	28.28	26.59
ncbi_101777751	WDR44	19.63	17.42	17.93	16.16	19.37	19.4	11.38	13.64	12.49	9.94	8.56	9.19
ncbi_101784326	RABF1	42.77	35.36	40.09	36.29	44.23	44.79	21.94	24.23	25.04	19.92	14.85	12.77
ncbi_101778061	UGT79	97.12	63.78	101.05	77.96	119.3	127.7	18.12	37.13	47.91	5.92	2.89	3.2
ncbi_101782424	AVT6A	218.01	166.52	197.65	180.91	201.84	233.62	64.12	95.11	112.81	64.61	46.04	64.29
ncbi_101776138	--	10.64	8.9	10.63	9.78	11.34	10.23	4.86	6.68	7.19	4.71	3.85	5.95
ncbi_101778506	AZI1	47.75	25.52	48.03	42.19	54.01	39.07	6.31	22.98	19.19	6.55	2.49	5.59
ncbi_101753084	--	96.04	92.92	83.47	81.43	88.01	81.25	45.96	43.69	40.39	31.19	32.44	32.41
ncbi_101755184	--	431.87	382.38	384.25	378.03	398.18	390.16	212.17	221.47	228.39	182.19	155.01	173.8
ncbi_101784316	--	46.42	38.15	37.97	42.58	41.52	39.88	11.48	14.47	14.63	8.24	7.5	7.45
ncbi_101764504	At4g13800	43.32	44.61	42.74	42.2	43.38	39.52	18.73	22.47	23.4	18.28	16.5	14.78
ncbi_101767549	DGK2	111.45	111.35	103.64	113.43	109.15	99.6	25.37	32.94	37.23	21.12	13.34	19.88
ncbi_101755647	ATJ10	119.89	118.58	103.75	109.49	119.17	107.02	61.76	67.35	70.86	58.59	56.47	51.49
ncbi_101765867	At5g35200	35.32	33.23	32.6	32.68	38.42	32.61	6.61	9.29	13.29	2.61	2.41	2.03
ncbi_101752613	--	18.72	16.64	15.38	15.4	20.06	18.05	6.96	9.04	10.12	6.62	6.93	7.1
ncbi_101755623	AGD5	165.3	163.39	154.92	145.64	167.35	166.29	89.89	95.37	108.06	84.38	83.87	85.01
ncbi_101757658	TULP8	53.2	54.61	41.42	51.5	55.8	57.81	17.28	24.47	23.09	15.78	13	14.53
ncbi_105914630	--	148.68	130.3	96.82	136.84	134.52	134.05	14.86	38.51	50.78	17.82	11.11	24.22
ncbi_101761252	GUX1	86.22	63.28	56.83	86.68	83.24	71.07	20.67	19.36	17.48	12.56	8.97	10.78
ncbi_101761531	--	121.49	85.16	92.64	106.24	102.24	91.55	37.5	37.57	40.58	31.74	23.88	25.01
ncbi_101762776	REM1.4	1109.09	708.33	632.88	863.77	867.73	857.92	215.73	250.28	309.39	135.18	99.22	107.23
ncbi_101758739	RPM1	8.95	7.17	4.79	7.35	9.61	6.78	2.77	2.77	2.46	1.33	0.6	0.95
ncbi_101782943	RING1A	15.59	14.48	13.07	15.46	16.92	15.88	11.43	9.99	9.75	8.64	8.87	8.14
ncbi_101780826	--	18.21	19.42	20.69	18.03	22.46	22.87	15.63	13.91	10.77	12.67	10.38	11.93
ncbi_101753154	LHT1	243.14	252.71	278.35	185.92	307.63	285.17	108.09	115.68	122.46	67.29	43.32	54.97
ncbi_101758536	PUB33	9.95	10.16	9.66	8.18	10.92	10.19	6.29	5.64	4.93	3.76	2.13	3.26
ncbi_101755005	PBL19	24.5	26.54	33.97	23.75	33.12	29.31	18.25	17.43	17.74	12.72	9.78	11.51
ncbi_101774927	MAPKKK3	83.02	81.59	93.63	84.54	101.03	110.36	54.71	60.46	59.37	40.57	33.95	35.16
ncbi_101759223	LCV2	51.04	44.79	50.7	48.22	61.88	56.98	29.26	33.18	27.51	17.49	15.31	17.21
ncbi_101753580	--	34.45	33.77	38.6	36.77	44.87	41.53	24.12	23.32	24.26	13.94	13.27	16.56
ncbi_101753938	NPGR2	29.97	32.24	33.87	30.4	41.13	38.01	18.74	18.33	18.68	8.48	10.29	9.91
ncbi_101759147	--	28.23	38.67	39.2	30.28	38.68	33.92	28.01	22.77	21.32	16.03	17.42	13.91
ncbi_101772626	--	3.83	5.66	6.78	4.18	4.99	6.94	3.22	2.3	2.06	2.25	1.17	1.04
ncbi_101784022	PUB35	78.38	86.41	103.19	62.5	89.28	102.44	57.18	51.51	42.4	37.08	34.87	39.56
ncbi_101781824	abkC	46.03	64.61	52.82	61.52	74.6	65.44	33.57	28.94	21.42	21.02	26.02	21.1
ncbi_101785948	ERF12	5.8	9.17	7.38	7.69	10.62	9.6	2.11	2.37	2.91	1.28	0.82	0.98
ncbi_101762280	--	53.56	60.65	49.05	60.13	55.8	67.71	34.36	30.63	22.66	22.03	18.26	27.32
ncbi_101777550	SF3B4	72.03	85.92	67.66	80.9	82.42	79.58	44.87	46.07	38.77	32.98	40.04	37.14
ncbi_101765009	--	156.21	187.21	153.6	190.18	161.08	193.32	61.67	75.23	69.94	52.81	49.9	58.85
ncbi_101761390	BT2	36.44	44.87	33.14	46.07	41.8	41.12	12.24	7.39	14.67	9.14	5.93	5.95
ncbi_101779579	PL10B	39.64	50.65	39.59	48.8	51.32	52.73	20.45	17.78	23.18	16.58	17.29	16.09
ncbi_101766853	TMEM184C	134.38	176.76	133.46	136.64	142.66	132.15	82.28	92.61	90.98	56.28	48.89	52.39
ncbi_101768460	GGT2	10.48	13.6	9.16	11.06	11.7	10.97	5.98	6.21	4.62	2.03	1.79	2.44
ncbi_101766972	PRH	14.26	15.72	15.22	14.43	16.22	15.19	9.25	9.36	10.24	6.28	7.03	7.61
ncbi_101771550	oxr1	83.11	92.74	93.47	85.07	88.53	80.79	23.28	30.34	28.63	10.77	8.05	10.16
ncbi_101773131	Os01g0911100	317.02	361.81	329.49	301.74	335.05	328.79	160.78	188.91	171.94	137.24	127.99	123.39
ncbi_101764172	VPS2.3	63.34	66.4	64.93	61.96	71.4	65.6	42.09	44.4	46.47	38.44	30.85	27.8
ncbi_101770316	CAD1	51.9	60.17	57.6	59.74	61.55	58.59	32.74	37.94	34.47	20.01	16.23	17.48
ncbi_101761283	--	117.5	143.51	70.77	103.56	115.13	154.28	30.47	39.59	59.67	19.24	8.17	7.55
ncbi_101767760	--	39.04	42.4	37.08	35.73	43.07	47.46	17.38	26.62	23.12	25.2	14.65	16.75
ncbi_101777294	CXE17	36.47	36.29	28.54	34.08	43.42	39.48	9.87	20.02	21.83	15.4	7.25	11.65
ncbi_101766271	PRR1	3.37	7.68	3.73	5.7	9.36	8.49	3.04	1.93	2.15	1.07	0.74	1.22
ncbi_101780173	HMGB15	108.95	154.67	94.99	107.69	165.74	146.58	69.02	54.97	61.62	77.76	49.23	50.54
ncbi_101761372	SIT2	6.51	6.62	4.57	5.86	7.87	9.22	5.51	3.3	2.59	1.76	1.32	1.43
ncbi_101766943	CSE	16.52	19.48	14.93	18.89	20.32	21.95	12.22	12.29	10.95	7.22	5.56	5.57
ncbi_101774654	--	15.3	16.92	15.04	16.28	19.59	18.42	14.38	13.05	10.63	8.91	7.97	8.45
ncbi_101755717	BASS3	2.57	14.44	3.73	11.99	13.06	9.92	2.07	2.17	1.22	2.07	1.35	0.89
ncbi_101760838	UGT73C5	0.56	2.23	0.79	1.97	2.37	1.42	0.2	0.76	0.23	0.21	0.18	0.06
ncbi_101785582	EXO70B2	7.07	16.01	8.8	12.19	15.87	11.51	1.19	3.99	6.32	1.18	0.1	0.15
ncbi_101763386	LSI2	348.82	536.23	427.42	584.53	763.12	539.93	165.37	336.09	295.48	231.44	203.1	237.71
ncbi_101786231	CAT9	11.07	13.26	12.29	13.4	14.19	13.04	10.44	11.5	11.68	11.54	10.24	10.84
ncbi_101762001	RGA2	2.5	3.72	2.99	3.24	4.14	2.86	1.85	1.57	1.89	1.2	2.16	1.66
ncbi_101768338	YML018C	22.73	25.98	25.27	33.03	38.33	29.5	18.11	19.24	17.35	14.62	17.59	14.93
ncbi_101780088	PAT11	8.09	9.43	9.71	10.38	12.9	11.15	6.23	7.2	6.4	5.48	6.81	5.15
ncbi_101757151	rnf-5	20.47	21.43	22.83	24.83	25.22	22.33	16.89	14.97	14.19	16.67	15.86	16.04
ncbi_101781324	SPI	11.33	13.67	13.52	17.15	19.43	14.54	4.73	4.95	6.5	5.14	5.14	5.8
ncbi_101771806	At1g07650	3.77	6.87	7.82	10.76	10.97	7.75	0.9	1.14	1.29	0.37	0.23	0.43
ncbi_101771986	ZFP1	30.02	44.06	48.01	64.01	58.07	48.14	10.39	13.2	14.03	9.64	8.71	8.18
ncbi_101784963	UMAG_01243	57.94	72.29	70.98	76.63	78.66	77.19	58.21	53.38	54.3	54.76	55.43	54.91
ncbi_105914335	ubq-1	764.97	1012.55	869.45	1240.22	1158.6	1114.63	570.73	431.08	380.11	660.56	464.29	453.15
ncbi_101775950	UBI11	670.89	883.73	856.64	1168.07	1065.31	1020.54	283.31	265.85	250.47	371.12	222.39	294.33
ncbi_101781234	--	36.6	48.83	43.96	64.62	53.46	57.36	22.87	20.07	17.44	22.91	19.25	16.49
ncbi_101780561	Os02g0209100	57.45	67.08	56.32	83.23	81.85	75.45	45.26	48.92	49.34	45.36	49.89	45.36
ncbi_101759920	LUH	23.64	27.93	24.74	38.43	35.04	29.75	13.63	15.72	17.26	14.84	16.53	16.14
ncbi_101773496	CALS10	47.28	53.01	50.19	70.94	69.18	63.53	30.27	38.38	38.1	33.22	38.93	39.53
ncbi_101769197	ADT3	41.24	48.91	40.05	69.25	63.46	60.31	27.03	22.2	20.58	20.11	24.19	17.9
ncbi_101772503	LACS6	65.91	111.28	79.6	170.58	144.21	130.75	35.96	32.05	29.57	20.98	33.51	29.96
ncbi_101776756	--	82.39	87.87	76.17	146.29	129.13	128.55	31.81	35.36	40.99	42.8	44.83	44.05
ncbi_101761241	--	69.2	77.63	66.44	105.65	112.45	98.7	35.66	39.4	34.28	38.28	33.9	35
ncbi_101770827	--	29.24	39.1	33.21	67.77	67.22	54.79	1.09	2.15	2.28	0.22	0	0.1
ncbi_101762315	yihQ	30.84	33.88	34.06	49.57	53.4	46.76	3.9	5.36	5.29	2.43	2.8	2.83
ncbi_101781901	--	76.34	95.52	95.99	117.78	118.49	112.85	39.52	38.29	36.15	27.36	29.25	30.26
ncbi_101759119	XI-B	12.27	13.71	15.19	17.56	19.06	18.76	6.74	7.61	8.52	6.09	7.18	7.13
ncbi_101781921	Os04g0252400	41.68	46.2	46.18	56.79	62.07	57.74	31.84	30.2	28.85	24.35	26.98	29.22
ncbi_101761186	ACA9	47.24	91.52	89.38	145.46	147.63	135.32	12.72	22.79	28.21	13.76	13.56	20.64
ncbi_101762208	ARP3	18.8	22.73	21.96	28.06	27.98	26.44	13.07	13.46	15	12.68	11.11	14.17
ncbi_101771737	Dcun1d2	117.88	150.65	135.71	175.96	181.89	171.54	82.89	88.85	94.04	86.64	67.21	73.51
ncbi_101786495	LPLAT1	98.79	107.39	111.54	140.4	146.18	130.12	84.94	92.32	72.76	81.37	72.5	81.15
ncbi_101776002	SIT2	4.5	9.15	8.61	14.68	16.28	10.39	2.44	3.16	3.07	2.29	2.09	2.47
ncbi_101763769	--	19.88	28.05	23.55	38.42	39.5	31.05	13.09	14.6	14.01	11.98	11.1	12.3
ncbi_101784750	At1g54610	46.19	80.99	66.32	108.62	117.84	96.36	22.62	30.04	27.12	26.32	18.61	16.93
ncbi_101761370	Smt2-1	33.45	39.12	38.05	42.43	41.39	37.28	23.98	31.69	31.43	27.68	16.54	20.38
ncbi_101773076	FOLT1	13.46	15.21	17.39	16.95	16.81	13.38	9.97	11.06	11.77	7.05	5.72	7.96
ncbi_101786709	--	140.77	168	184.97	190.41	169.44	154.76	91.61	106.26	97.3	45.68	38.3	46.13
ncbi_101756627	--	448.81	486.46	522.93	630.73	508.28	428.25	210.8	265.79	288.63	121.37	71.31	85.25
ncbi_101762132	DRP1A	79.18	87.81	92.55	105.54	91.47	85.11	50.21	60.31	57.79	41.37	38.85	40.24
ncbi_101758761	WRKY55	0.56	1.39	1.14	1.11	1.34	0.57	0.37	0.54	0.27	0.37	0.15	0.07
ncbi_101779735	Os05g0571100	0.53	0.96	1.23	0.98	1.23	0.67	0.23	0.59	0.62	0.03	0.11	0.02
ncbi_101780745	NAC017	29.17	41.56	33.86	47.53	48.37	47.23	29.42	31.26	30.97	19.27	19.2	21.91
ncbi_101767481	PUB4	20.19	21.67	21.8	27.49	30.99	28.55	16.64	16.17	15.79	9.66	7.24	9.59
ncbi_101767501	LHT1	156.51	190.56	190.12	283.65	286.9	305.91	131.35	123.4	114.22	49.48	37.2	39.34
ncbi_101774634	B3GALT7	35.35	45.6	43.29	63.55	68.09	62.25	27.9	26.61	26.58	12.78	10.4	13.94
ncbi_101772761	RPI2	26.65	30.97	28.61	55.3	55.44	48.73	15.78	24.45	20.85	9.44	5.5	10.62
ncbi_101780587	OPR7	77.93	96.25	98.85	150.48	154.31	123.82	66.16	75.27	62.45	29.55	25.16	24.97
ncbi_101758810	SCAMP2	88.92	116.41	99.85	164.11	146.57	142.76	79.73	78.17	72.57	61.17	54.86	55.02
ncbi_101759762	SCRM	12.87	18.64	15.11	30.64	26.64	27.83	14.59	8.91	10.09	5.72	6.31	6.03
ncbi_101761299	CNGC6	32.22	36.82	32.35	39.18	40.03	37.18	30.32	28.99	28.03	24.74	26.65	27.13
ncbi_101759088	--	79.57	89.26	72.9	113.83	120.99	107.74	65.01	68.43	60.11	49.37	42.2	39.62
ncbi_101780275	Os02g0718900	4.1	6.12	3.03	9.19	9.15	7.99	3.17	3.31	3.12	0.81	0.5	1.39
ncbi_101773703	Os02g0778400	348.62	354.11	424.65	583.11	514.63	472.78	271.63	223.43	169.5	86.11	82.76	78.31
ncbi_101762807	VPS2.1	124.12	118.47	115.91	153.54	136.46	136.68	65.02	55.66	55.74	31.94	21.51	34.86
ncbi_101768008	CNR8	45.83	44.55	39.56	59.2	53.86	48.02	28.02	27.5	29.35	16.72	14.56	18.03
ncbi_101770691	NTAN1	22.69	28.71	24.47	34.71	35.45	24.63	16.45	17.82	18.81	9.9	8.18	12.34
ncbi_101771643	CML14	1.88	2.37	1.83	2.59	3.24	2.56	0.89	1.13	1.04	0.42	0.47	0.19
ncbi_101764355	UBC36	130.04	158.59	146.14	182.84	183	157.6	95.44	119.63	110.38	87.27	67.42	73.87
ncbi_101786167	ARF1	378.85	422.49	381.5	456.4	446.89	421.38	312.22	338.33	338.6	273.1	255.89	240.22
ncbi_101777347	EPSIN3	51.93	53.45	44.29	61.84	58.24	55.05	29.29	33.55	38.12	23.9	25.33	32.12
ncbi_101754999	RIC2	88.19	104.4	87.03	111.4	104.37	92.7	73.71	73.94	73.59	65.74	63.22	67.68
ncbi_101781848	SEC10	32.51	36.33	31.88	39.68	35.38	35.27	27.8	27.18	26.59	26.21	24.78	26.47
ncbi_101757844	--	67.85	96.81	87.89	163.8	96.03	114.83	31.92	47.93	44.28	9.78	4.23	12.22
ncbi_101767220	At4g29530	76.95	82.68	92.7	129.32	94.01	91.14	48.04	51.72	59.66	21.2	16.2	22.65
ncbi_101771995	UXS4	374.91	536.36	540.17	840.98	657.08	633.71	314.7	301.22	289.93	65.69	51.51	62.92
ncbi_101772807	mipp1	47.31	52.13	46.95	77.34	46.65	47.48	25.44	27.09	29.1	15.76	16.8	18.07
ncbi_101783971	B3GALT7	119.22	147.5	138.27	213.67	138.61	166.91	39.28	53.25	52.22	28.13	28.5	32.18
ncbi_101764133	HAK7	138.87	180.43	171.34	248.51	183.97	162.41	31.63	70.42	78.55	26.21	19.41	45.72
ncbi_101768942	Os03g0158200	84.09	119.97	111.6	147.69	103.65	102.74	38.44	47.65	52.77	26.58	28.53	37.71
ncbi_101758700	PP2B1	113.14	79.77	86.16	137.57	105.81	104.39	37.38	40.63	45.89	25.51	21.57	38.65
ncbi_101758860	--	6.37	3.71	5.31	7.67	6.55	5.26	0.47	1.24	1.08	0.36	0.11	0.2
ncbi_101764463	FER	115.45	83.59	96.81	132.54	113.13	106.37	37.69	62.47	69.85	37.25	29.5	33.27
ncbi_101769521	--	749.19	585.6	616.66	914.65	814.33	799.48	164.29	348.27	296.01	161.29	56.54	210.41
ncbi_101770697	--	243.22	188.39	166.25	258.92	197.54	185.94	104.04	123.46	114.7	69.42	48.25	65.71
ncbi_101780792	BRO1	56.23	54.62	50.23	70.12	60.2	51.34	36.97	43.39	40.13	35.63	32.36	33.58
ncbi_101756603	TPKA	12.84	13.06	12.58	16.45	16.09	13.65	9.2	9.82	11.21	10.75	7.6	7.75
ncbi_101775739	XBOS34	86.32	85.81	93.79	109.38	94.14	91.81	56.04	68.93	70.16	70.33	58.2	57.2
ncbi_101752843	At4g17486	15.77	16.36	16.73	15.68	18.19	18.82	15.59	15.07	18.98	13.3	10.5	10.97
ncbi_101781202	MADS56	114.97	127.75	146.54	123.68	138.19	148.09	87.4	104.83	136.97	56.66	34.94	44.83
ncbi_101775304	Tbc1d9	6.5	6.64	7.13	7.79	8.39	8.58	6.47	6.68	8.36	4.27	5.68	4.75
ncbi_101754809	NAD-ME1	40.84	45.8	41.61	42.26	48.46	46.81	40.89	39.86	46.05	34.32	35.45	28.67
ncbi_101778433	SAC7	69.7	71.39	69.05	71.23	78	76.82	66.65	66.1	69.73	58.69	63.11	53.06
ncbi_101755271	NPF8.3	30.55	23.15	23.26	29.03	33.18	28.51	22.93	28.65	26.9	14.64	14.48	16.44
ncbi_101765718	MES12	21.38	16.48	18.67	22.43	26.8	23.47	16.57	19.17	19.62	11.76	8.24	8.58
ncbi_101777932	GAUT10	17.61	15.07	14.44	13.87	17.95	16.42	11.79	15.48	15.62	9.82	7.08	9.54
ncbi_101761799	HERC2	9.33	6.18	6.04	7.45	10.8	8.84	3.72	7.19	5.22	2.06	1.75	2.49
ncbi_101769335	VAMP711	108.68	72.61	86.9	91.16	105.77	91.38	53.93	74.53	73.54	40.67	33.9	30.62
ncbi_101776108	TPC1	53.06	45.16	54.01	57.85	66.49	56.43	33.39	45.96	53.95	37.64	34.53	34.44
ncbi_101773311	PATROL1	23.75	20.85	23.59	28.64	29.5	25.7	14.45	19.91	21.45	13.51	12.02	12.25
ncbi_101780555	ABCB8	12.67	11	12.29	15.72	17.56	18.76	3.49	9.1	10.63	3.38	2.78	3
ncbi_101762241	AVT3C	120.66	84.31	109.23	144.46	134.76	106.6	63.11	99.75	102.73	66.31	40.1	37.92
ncbi_101785510	GAUT14	14.75	9.85	15.12	17.01	16.79	15.03	9.8	9.73	13.34	3.56	3.46	4.03
ncbi_101779097	At5g46170	21.59	19.98	20.02	26.78	25.05	26.66	12.71	19.5	18.66	7.46	4.36	8.43
ncbi_105913802	--	20.76	20.67	21.17	30.71	27.5	20.64	8.42	18.56	18.09	2.32	1.14	1.93
ncbi_101784581	GLB3	48.78	52.18	46.27	53.82	62.63	56.84	41.76	52.22	49.06	30.81	19.72	21.46
ncbi_101786633	ARF3	43.41	44.61	43.32	45.65	50.35	48.61	41.2	39.51	39.12	30.63	22.5	22.6
ncbi_101781037	TOL3	47.72	50.42	45.32	49.89	55.88	53.15	40.84	45.85	40.9	32.85	28.07	29.14
ncbi_101786183	--	14.96	15.58	13.91	15.93	19.86	16.07	12.25	14.15	10.27	4.69	3.16	3.17
ncbi_101777302	CHR10	5.09	6.53	5.91	6.71	9.12	7.47	5.92	5.54	6	3.23	3.16	3.73
ncbi_101754351	yipf1	19.21	21.74	20.17	25.93	30.83	26.1	18.67	22.7	18.88	10.21	9.87	9.42
ncbi_101755578	--	52.49	56.57	50.85	58.9	66.43	58.48	51.45	48.85	46.88	37.2	33.77	34.94
ncbi_101761171	TIFY10B	330.98	362.59	343.31	430.13	507.28	400.2	291.21	292.02	330.86	156.63	125.38	138.03
ncbi_101771903	PRX74	70.89	67.12	68.51	83.12	125.7	85.01	51.52	42.82	40.55	8.59	9.42	17.23
ncbi_101766225	KINB1	43.29	45.36	44.86	45.86	54.51	45.92	34.62	37.8	34.15	26.85	24.53	27.98
ncbi_101780559	SRP72	28.63	27.3	27.87	28.45	35.95	29.44	22.71	24.23	21.81	16.45	14.88	15.88
ncbi_101757946	At5g66560	1.96	1.8	1.91	1.84	3.36	2.29	0.41	0.6	1.21	0.63	0.24	0.33
ncbi_101761791	DDB_G0276461	33.93	30.85	31.99	35.82	43.47	35.73	15.84	23.27	24.63	17.12	14.81	15.26
ncbi_101786918	MNS1	67.48	63.45	63.34	67.15	79.06	72.8	46.35	46.45	54.61	40.97	41.22	43.27
ncbi_101764416	UGT79	0.42	0.39	0.21	0.48	0.88	0.5	0	0.34	0.18	0	0	0
ncbi_101760824	NPF8.3	24.2	23.6	21.19	34.63	48.86	30.64	11.19	25.95	22.1	4.38	3.16	2.85
ncbi_101768915	spast	0.92	0.71	0.75	1.22	1.63	1.18	0.2	0.87	0.76	0.09	0.07	0.1
ncbi_101761099	ADT2	31.64	28.2	32.49	43.17	50.34	42.72	18.56	26.95	20.9	14.27	13.53	13.04
ncbi_101773780	BB	128.14	116.08	139.98	184.11	238.47	203.72	68.67	102.8	90.87	64.99	32.64	49.38
ncbi_101771351	At5g05600	14.47	13.11	14.95	16.03	25.67	20.73	7.08	12.72	10.26	5.1	3.32	4.05
ncbi_101773927	--	7.29	7.25	7.72	9.91	12.6	10.32	5.66	6.25	6.41	3.66	2.11	2.3
ncbi_101760884	TIFY6B	239.18	221.09	237.53	310.21	353.35	287.76	186.26	243.71	216.37	186.02	117.32	161.98
ncbi_101771138	BIM2	63.7	66.38	57.42	83.65	88.32	78.87	38.94	57.39	47.98	31.56	17.84	21.79
ncbi_101783763	UBC32	110.81	112.72	110.45	128.42	133.39	124.35	98.32	108.52	104.38	98.34	85.22	84.11
ncbi_101768667	EXO70A1	0.67	0.58	0.75	0.86	1.13	0.93	0.7	0.76	0.58	0.4	0.32	0.69
ncbi_101769718	CML21	0.74	1.83	2.2	2.25	2.99	2	1.69	1.83	0.89	0.22	0.5	1.22
ncbi_101765090	BAGP1	35.19	39.92	36.75	42.76	46.28	39.7	36.26	36.49	35.89	30.35	33.88	35.21
ncbi_101765312	LHT1	1.62	2.77	2.4	2.69	4.33	2.09	1.58	2.2	1.47	0.61	0.31	1.32
ncbi_101761253	CRT3	139.63	208.48	199.58	287.34	271.24	284.11	131.42	196.49	191.06	117.35	78.88	115.74
ncbi_101777732	ABCC3	20.24	31.46	26.06	38.34	42.81	40.9	17.77	33.7	24.57	17.08	16.59	20.66
ncbi_101786887	DTX49	6.22	10.7	10.84	15.7	24.05	23.35	6.94	14.77	7.34	4.78	1.03	1.97
ncbi_105913882	--	1.32	2.48	2.57	3.09	4.26	4.18	1.74	1.82	2.04	1.78	0.73	1.25
ncbi_101755594	TMN11	31.06	37.28	31.92	42.44	39.04	40.35	30.75	35.74	32.43	25.42	23.58	24.77
ncbi_101771733	RFS6	0.89	2.56	1.98	4.36	3.2	3.77	2.07	2.06	1.93	0.16	0.09	0.06
ncbi_101758402	yipf6	30.52	41.73	33.03	44.89	42.17	40.84	37.82	37.75	32.62	29.6	25.59	26.81
ncbi_101764535	PLA1	5.11	11.39	7.2	15.56	12.71	11.8	8.79	8.78	7.76	5.64	4.75	5.89
ncbi_101757309	--	61.29	78.74	56.96	84.3	91.78	79.87	64.96	65.43	62.36	60.72	42.5	52.88
ncbi_101769633	SAR1A	52.55	69.33	50.5	69.22	73.35	64.42	55.52	56.82	50.11	49.54	42.95	40.01
ncbi_101766300	PDIL5-2	31.96	39.36	31.54	40.8	44.99	42.82	36.16	34.92	31.85	26.74	28.75	24.19
ncbi_101763864	TMN8	81.33	102.24	90.1	128.81	129.68	114.17	100.38	95.28	81.87	68.69	67.38	66.49
ncbi_101759759	NAC068	111.34	140.34	114.32	255.42	231.02	198.16	138.84	102.45	74.32	34.8	25.97	36.02
ncbi_101770687	GPX4	75.91	83.83	68.24	108.48	107.57	102.86	86.48	71.81	64.21	49.69	49.82	52.71
ncbi_101755449	At2g24330	33.15	40.74	33.07	41.06	43.88	41.67	36.14	34.37	33.35	26.34	31.96	37.42
ncbi_19526818	petB	3.33	4.25	3.05	4.31	4.22	5.2	3.38	2.91	3.39	1.84	1.45	3.87
ncbi_101764800	RRT1	14.15	18.66	15.18	26.51	21.63	24.07	14.32	12.94	14.89	10.72	8.87	15.26
ncbi_101778715	PME15	1.24	1.73	1.18	2.68	1.75	2.67	0.89	0.8	1.08	0.21	0.21	1.28
ncbi_101786697	DRIP2	2.29	2.14	1.63	2.87	2.56	3.23	1.17	2.57	1.36	1.26	1.28	1.6
ncbi_101756868	At1g78690	10.54	9.72	7.18	9.36	11.98	13.55	7.73	10.41	8.9	6.33	4.06	6.17
ncbi_101764871	GLCAT14A	10.95	12.09	8.79	10.65	12.86	12.37	7.97	11.37	10.01	7.65	6.25	7.54
ncbi_101761634	--	128.91	172.76	154.2	94.13	74.97	120.25	114.81	99.46	89.53	44.87	19.9	42.61
ncbi_101763561	NAC014	121.38	130.16	123.16	115.38	78.79	123.26	106.83	89.99	87.53	60.55	52.54	75.24
ncbi_101783232	HIPP05	393.52	464.5	559.12	447.25	297.09	451.85	396.11	327.06	294.63	184.68	114.77	199.86
ncbi_101760183	--	1.34	1.81	1.44	1.1	0.74	1.59	1.03	0.67	0.82	0.6	0.52	0.68
ncbi_101772050	SRC2	723.82	821.8	883.67	716.07	576.74	836.47	720.8	629.88	601.56	607.29	410.4	550.31
ncbi_101767597	--	117.22	148.07	184.3	143.89	68.76	144.87	96.53	73.93	73.4	60.55	41.39	65.29
ncbi_101774065	--	117.09	209.44	195.34	168.92	84.58	161.33	133.6	98.3	78.51	88.74	50.53	89.69
ncbi_101774874	At5g01750	2.37	3.67	7.74	3.48	1.86	4.95	0.46	0.22	0.38	0.1	0.42	0.05
ncbi_101755407	--	14	23.42	38.45	25.42	12.06	30.46	7.57	10.68	7.35	3.13	1.56	5.07
ncbi_101768812	LECRK91	2.28	3.82	5.89	3.26	2.58	4.16	1.33	1.97	1.07	0.33	0	0.32
ncbi_101775033	ATL4	3.09	4.54	6.09	3.84	4.32	5.02	3	2.85	2.52	2.38	2.6	2.94
ncbi_101785850	TPP2	84.23	153.68	201.58	149.57	137.76	161.52	100.28	105.35	102.95	80.82	63.04	65.06
ncbi_101758866	PBL27	25.57	32.95	32.28	33.04	26.18	27.52	22.73	21.85	25.08	16.59	21.33	22.19
ncbi_101777760	At1g03370	6.29	7.38	8.41	7.13	6.17	6.7	5.12	5.09	6.11	2.89	4.48	4.25
ncbi_101753760	PUB44	23.31	36.96	47	32.16	27.47	38.54	4.77	11.12	14.29	1.54	0.82	1.69
ncbi_101764468	MPK12	574.75	656.56	960.87	590.77	564.64	612.47	60.41	159.11	216.8	21.12	14.3	20.35
ncbi_101764496	RGLG2	624.35	848.89	1022.79	776.01	593.75	732.92	149.68	258.47	224.66	59.19	38.64	48.18
ncbi_101776926	OsI_07012	783.52	1035.79	1293.33	925.09	620.6	980.53	338.4	493.13	483.23	260.51	173.29	296.79
ncbi_101785139	spast	22.8	37.56	61.01	32.3	25.26	34.54	4.41	11.63	17.79	2.82	2.4	4.81
ncbi_101755540	--	5.67	7.6	10.11	9.29	5.09	8.75	3.17	4.36	4.02	2.06	1.38	1.98
ncbi_101773692	MAPKKK3	5.17	7.29	10.18	7.98	6.5	7.03	3.88	4.62	3.47	1.5	1.1	2.17
ncbi_101760437	PCMP-E64	27.33	40.02	48.48	33.15	17.91	32.22	11.76	17.27	19.47	3.49	2.4	1.41
ncbi_101760718	TPIP1	456.69	641.74	811.48	514.19	403.15	572.65	250.55	383.27	397.43	140.22	57.55	108.32
ncbi_101770766	ABCG28	161.71	211.12	223.8	188.52	154.23	166.81	87.75	124.53	134.23	54.36	36.83	51.16
ncbi_101767207	AMC1	83.88	105.38	126.79	101.22	91.11	93.33	36.72	56.21	49.78	18.32	16.47	24.64
ncbi_101783663	ALIS3	189.63	268.45	303.48	227.5	181.4	216.09	101.73	126.42	114.18	40.41	33.72	50.62
ncbi_101753094	--	0.8	2.24	1.32	1.66	0.73	1.52	0.3	0.54	0.28	0.04	0.09	0.08
ncbi_101755343	--	6.11	13.01	9.79	9.27	5.16	8.21	2.92	3.45	2.89	1.28	1.52	1.28
ncbi_101772768	SKIP14	55.19	111.24	89.47	75.42	58.55	60.03	42.2	48.72	39.27	30.25	39.28	42.46
ncbi_101760851	--	142.11	343.27	279.26	269.66	153.85	203.31	49.92	97.64	80.61	43.68	36.89	57.46
ncbi_101775924	Os03g0817100	14.77	48.19	34.22	39.67	20.98	27.89	4.12	9.26	6.65	3.25	3.58	7.54
ncbi_101768379	At3g03980	62.99	264.63	176.29	203.11	80.66	138.98	34.05	91.34	53.48	19.5	23.74	27.93
ncbi_101781480	REIL1	114.24	345.23	262.94	265.82	124.69	157.97	66.96	99.09	83.2	50.72	56.18	59.85
ncbi_101759767	--	0.98	3.98	4.86	3.6	1.57	2.63	0.53	0.53	0.37	0.34	0.14	0.25
ncbi_101781139	CRK6	15.54	56.8	61.28	41.76	18.36	22.7	9.27	11.98	10.06	3.02	2.8	4.17
ncbi_101754757	KCS11	212.25	452.39	386.65	363.24	187.66	292.94	227.89	171.5	193.83	146.55	98.5	130.49
ncbi_101775955	SIT2	8.28	20.24	18.84	15.47	11.02	13.93	9.4	7.48	8.5	8.23	5.34	7.38
ncbi_101763914	OPR5	54.23	110.8	124.92	78.46	31.71	74.67	26.33	65.17	24.51	2.78	5.88	4.97
ncbi_101763106	OPR5	62.24	242.27	268.99	146.27	38.86	99.11	21.33	78.72	49.86	9.82	13.48	13.9
ncbi_101763510	OPR5	25.86	84.26	84.53	50.13	15.11	38.79	10.9	31.72	16.98	3.57	6.01	4.64
ncbi_101772243	MAPKKK3	225.36	337.11	330.84	297.02	182.37	183.76	113.54	181.36	156.57	98.35	73.25	89.95
ncbi_101753916	2023-10-07	101.68	184.16	185.81	143.5	103.27	107.09	59.32	69.4	64.36	26.78	20.51	25.8
ncbi_101754969	At2g01600	140.77	184.47	177.14	158.72	136.4	141.3	108.16	123.89	120.59	89.97	94.61	96.69
ncbi_101757770	EXO70B1	11.11	25.06	21.24	16.66	9.85	13.64	3.4	8.69	8.14	5.21	4.61	5.03
ncbi_101770979	coq10b-a	69.74	111.48	99.77	70.75	37.86	57.22	28.04	42.07	42.35	25.33	14.14	25.42
ncbi_101780776	At1g51890	56.89	122.95	116.87	78.05	41.79	50.3	20.46	48.94	44.4	9.53	9.33	12.16
ncbi_101761761	IP5P4	1.53	1.24	0.58	1.63	1.16	1.18	0.09	0.12	0.13	0.04	0.12	0.05
ncbi_101767092	Tbc1d15	65.12	60.02	54.92	67.24	57.67	55.84	46.73	45.3	46.24	43.4	49.63	44.6
ncbi_101767348	PCL1	3.9	4.47	3.26	3.75	3.56	3.47	2.1	2.36	2.02	1.22	1.77	1.95
ncbi_101768151	VPS32.1	118.06	115.03	96.58	113.6	96.92	91.95	77.16	78.15	64.5	55.86	57.96	68.4
ncbi_101774858	Os07g0682400	2.59	3.23	2.17	3.9	2.86	2.4	0.93	1.18	1.29	1.56	0.91	0.74
ncbi_101755633	TPS23	1.37	1.94	1.48	2.08	2.15	1.21	0.3	0.03	0.03	0.12	0.03	0
ncbi_101773370	Os10g0369500	4.91	6.89	5.7	6.81	6.68	4.98	2.08	2.58	2.63	1.81	1.84	2.37
ncbi_101754543	GSVIVT00023967001	7.13	6.74	4.41	5.88	7.63	4.61	2.6	2.92	3.09	2.28	1.84	0.86
ncbi_101762915	CYP92C6	17.36	24.09	13.55	21.17	22.08	7.7	5.57	7.93	5.72	1.34	0.92	3.06
ncbi_111255670	CYP92C6	20.12	25.72	15.47	29.96	27.76	13.67	5.33	7.37	7.32	1.84	0.81	2.95
ncbi_101757736	MFP	2.58	3.8	2.3	2.54	2.71	2.12	1.82	1.53	2.1	1.85	1.69	1.86
ncbi_101765737	sll0005	16.61	19.15	16.05	16.5	15.89	15.85	12.46	11.15	13.15	13.52	13.85	13.64
ncbi_101755734	--	1.23	2.41	0.69	0.99	0.4	1.18	0.36	0.49	0.22	0.08	0.25	0.15
ncbi_111257627	--	0.59	1.51	0.73	0.62	0.56	0.61	0	0.32	0	0	0	0
ncbi_101766529	--	23.91	33.9	27.01	26.34	24.7	28.49	20.22	21.13	19.46	21.33	19.24	22.19
ncbi_101768152	--	43.38	83.54	48.43	44.82	42.94	48.92	24.74	24.86	20.77	17.37	10.67	21.13
ncbi_101772607	SAP11	445.64	692.28	461.63	407.93	435.13	516.57	248.02	249.17	278.35	255.02	184.45	226.31
ncbi_101779780	--	7.19	7.35	6.81	8.46	6.59	8.58	1.86	5.38	4.68	3.21	3.16	4.84
ncbi_101752625	--	1.08	1.51	0.85	1.43	0.91	1.88	0.05	0.3	0.21	0.16	0.04	0.21
ncbi_101758397	--	0.6	1.03	0.75	1.27	0.42	1.28	0.1	0.15	0.12	0.06	0.04	0.17
ncbi_101766361	--	2.32	2.42	2.25	3.08	2.17	2.64	0.32	0.71	0.92	0.81	0.93	0.95
ncbi_101772673	EB1C	0.88	0.77	0.83	1.31	0.68	1.04	0.1	0.04	0.48	0	0	0.04
ncbi_101780159	NAC090	98.32	161.4	152.61	175.82	96.97	140.65	38.46	85.61	54.31	17.13	11.44	15.82
ncbi_101761703	NAC071	478.29	787.48	711.13	851.41	630.44	779.6	279.68	357.34	320.9	197.33	159.11	268.81
ncbi_101765366	At2g47060	289.09	449.19	461.93	525.11	338.87	455.74	94.78	136	143.99	50.56	35.32	46.8
ncbi_101779371	Os02g0146600	322.04	461.28	414.77	480.88	372.57	405.64	154.99	203.52	212.81	127.07	100.13	149.87
ncbi_101770803	HIT4	57.84	63.12	69.83	74.89	59.82	58.81	28.36	39.21	37.35	20.77	23.11	22.37
ncbi_101756387	RIBA2	575.67	661.19	765.04	780.78	505.88	595.28	148.85	265.83	306.44	108.65	81.4	139.1
ncbi_101762728	CALS12	42.61	57.69	65.72	65.69	43.13	45.22	17.11	25.6	23.36	5.98	6.13	6.92
ncbi_101761912	B''BETA	22.02	35.61	29.64	37.83	28.69	26.32	9.74	11.85	10.93	7.35	6.99	10.22
ncbi_101765549	CIPK9	391.87	529.42	443.51	510.36	415.3	378.68	178.95	217.47	237.83	155.33	132.43	186.98
ncbi_101772058	CBP60B	25.2	36.14	38.79	39.44	30.69	26.79	4.26	10.16	10.87	3.8	1.72	2.99
ncbi_101781455	ERH1	215.09	371.24	334.13	341.02	262.92	239.45	92.64	112.75	95.19	36.48	29.6	39.87
ncbi_101757722	RAN2	1241.6	1636.73	1595.48	1400.77	925.6	1157.16	487.46	643.04	605.22	441.05	375.26	487.05
ncbi_101778589	CEQORH	563.85	1004.96	883.82	841.42	448.07	586.76	174	223.41	233.18	125.45	116.12	127.9
ncbi_101771813	CPK20	247.35	427.81	478.31	394.81	216.85	308.02	70.54	118.79	110.77	35.29	26.4	42.91
ncbi_101780573	HCT2	185.6	383.37	450.55	384.31	186.7	295.07	60.15	84.06	58.55	24.52	17.49	20.06
ncbi_101756302	CIGR1	624.64	1072.57	1119.75	1097.01	502.48	853.75	191.52	300.07	293.13	151.69	83.39	201.32
ncbi_101768176	CYPRO4	196.96	289.48	325.17	326.06	145.83	232.4	78.33	88.41	88.12	77.55	47.19	89.84
ncbi_101784835	KIN14J	1.54	1.85	1.61	1.87	1.28	1.46	0.56	0.44	0.63	0.45	0.68	0.59
ncbi_101755504	CRK2	123.47	163.27	141.49	137.1	73.63	135.18	40.55	24.56	18.47	20.66	21.51	24.05
ncbi_101772628	MPSR1	219.09	390.49	335.27	355.05	156.83	293.72	48.09	24.83	20.56	73.07	51.86	41.46
ncbi_101772716	--	23.27	27.59	21.96	23.92	19.62	25.6	14.46	10.95	11.11	13.62	8.94	10.18
ncbi_101757825	CRK12	0.77	1.29	0.95	1.16	0.92	1.2	0.33	0.44	0.34	0.44	0.18	0.11
ncbi_101766681	PECT1	124.41	174.47	131.13	155.53	138.78	137.13	75.38	72.2	64.79	69.54	48.95	50.12
ncbi_101752807	XYP11	0.68	1.02	0.85	1.02	0.91	0.96	0.5	0.35	0.41	0.35	0.18	0.58
ncbi_101760426	--	72.06	123.76	130.55	139.16	93.92	107.4	43.41	42.92	55.58	42.92	38.37	38.91
ncbi_101773766	DREB2B	157.1	259.68	231.25	271.12	186.27	201.98	73.45	82.88	76.95	88.47	77.94	101.1
ncbi_101752848	DTX27	5.94	10.28	9.22	9.7	8.18	10.26	1.16	0.97	1.71	3.67	1.87	2.19
ncbi_101764359	CPL2	38.96	54.37	65.57	62.65	52.81	58.56	11.8	16.99	17.46	16.02	15.33	16.29
ncbi_101769198	EXL2	8.93	12.45	18.29	16.18	13.87	16.08	0.41	1.04	1.14	0.32	0.23	0.13
ncbi_101752837	At1g03370	12.81	18.72	18.38	16.28	16.36	16.47	6.58	8.78	8	6.99	6.74	7.52
ncbi_101760791	At5g49770	67.23	118.2	123.3	101.88	92.86	120.08	15.82	19.54	22.32	6.62	4.86	6.36
ncbi_101780685	PIX13	15.2	26.74	25.65	24.78	20.2	26.41	3.59	5.42	4.64	0.55	0.76	1.14
ncbi_101758880	WAK3	30.73	63.21	64.58	51.56	46.74	56.37	11.11	12.4	11.85	8.33	9.19	8.38
ncbi_101762242	tm-2	5.28	8.8	9.38	8.06	6.53	8.03	2.39	3.02	2.2	1.86	1.53	1.65
ncbi_101780167	SF3B1	30.74	37.01	33.37	34.43	33.49	33.84	24.22	25.79	24.14	23.31	28.62	26.85
ncbi_101785307	IP5P9	8.47	14.01	10.86	11.08	10.71	10.07	6.81	4.3	4.47	4.41	8.61	7.37
ncbi_101770251	SCL14	2.71	10.32	4.69	6.24	7.2	8.87	1.75	2.91	2.76	1.23	1.49	4.56
ncbi_101767335	ROC5	22.87	42.43	33.89	34.04	33.55	36.19	16.89	19.48	18.48	20.45	19.49	15.82
ncbi_101781311	TOL6	47.56	71.65	61.88	63.97	71.06	71.18	40.04	46.57	36.66	42.54	39.41	41.93
ncbi_101755010	CALS9	67.72	89.73	74.39	92.47	92.81	89.15	37.27	48.77	49.99	40.68	46.12	49.23
ncbi_101771116	RGA1	2.98	5.16	4.75	4.35	5.2	5.04	1.17	2.72	2.42	1.11	2	2.34
ncbi_101763890	CYP714D1	12.27	25.62	14.25	27.08	20.5	20.55	18.24	9.36	8.72	6.16	4.82	11.35
ncbi_101761325	ZIP7	6.54	9.63	7.54	9.9	9.28	8.64	7.7	6.21	6.5	5.18	4.9	4.69
ncbi_101777506	--	4.42	10.66	6.06	14.07	9.4	7.76	6.72	5.21	3.42	1.17	0.68	1.81
ncbi_101772456	GRMZM2G124911	18.77	34.2	25.04	34.27	29.03	26.3	15.51	16.79	15.86	10.47	10.45	12.1
ncbi_101779130	--	13.19	19.42	14.35	18.89	16.21	15.71	13.09	11.57	11.33	9.85	10.38	9.29
ncbi_101766729	MPT3	36.56	89.58	60.43	76.19	60.22	64.57	40.54	38.78	23.97	20.98	21.02	24.08
ncbi_101779862	ALA1	28.92	93.25	49.29	79.74	46.69	52.46	38.3	28.34	18.24	14.97	14.98	18.74
ncbi_101755300	BAM1	25.05	59.7	44.08	59.7	39.19	51.36	38.19	29.96	21.86	11.56	9.7	10.89
ncbi_101772215	ARB_05372	6.88	22.23	14.68	17.93	13.28	13.2	11.69	7.01	5.87	1.88	1.68	2.67
ncbi_101773633	SCAPER	4.41	5.77	4.25	5.84	5.79	6.01	3.77	3.85	4.41	2.75	3.79	3.34
ncbi_101783881	KEG	23.95	26.87	22.93	26.82	23.69	24.1	19.03	17.25	21.22	14.69	18.03	18.98
ncbi_101755946	MOS2	20.28	23.67	25.57	23.78	20.17	22.82	18.51	22.78	20.75	14.73	15.74	16.85
ncbi_101763748	GSVIVT00037159001	0.64	3.05	3.18	3.37	1.03	3.58	1.18	3.22	1.62	0.18	0.28	0.04
ncbi_101774447	UGT83A1	0.77	1.3	1.42	1.94	0.88	0.53	1.03	1.53	0.72	0.25	0.31	0.33
ncbi_101755585	--	68.34	119.11	118.37	116.78	77.64	80.76	78.87	84.36	71.02	39.88	31.86	45.15
ncbi_101774063	--	41.65	67.93	63.11	72.96	53.97	46.78	45.38	53.65	50	33.01	27.88	31.37
ncbi_101754778	--	32.16	40.58	33.88	58.96	26.56	52.32	41.94	29.83	25.39	10	7.84	14.15
ncbi_101756799	WRKY11	18.64	33.33	29.58	48	19.73	31.91	22.61	25.17	20.33	11.94	6.44	13.42
ncbi_101769159	NHL6	236.2	394.3	314.42	457.42	263.58	362.32	360.56	348.05	304.18	147.15	97.2	173.51
ncbi_111257853	SB20O07.14	58.66	91.55	78.79	93.87	77.97	98.34	89.34	62.65	57.73	30.41	13.63	25.89
ncbi_101773216	SCD2	16.85	25.41	22.02	31.76	24.15	26.44	29.02	22.61	18.24	11.24	7.91	9.87
ncbi_101782008	--	25.46	42.97	32.61	48.19	37	42.33	46.67	40.8	27.49	16.71	10.35	15.34
ncbi_101759954	At2g19130	11.98	20.22	11.5	17.12	12.86	12.02	13.25	9.84	7.84	2.75	2.35	2.57
ncbi_101780679	--	70.59	104.95	90.83	108.76	91.49	82.82	84.47	75.32	55.42	35.17	39.13	44.04
ncbi_101773769	ACBP6	41.55	49.59	44.97	52.75	45.1	42.05	44.97	43.38	41.69	29.78	28.36	24.8
ncbi_101781011	WRKY2	23.95	42.05	29.34	45.18	38.88	32.3	27.07	34.09	25.84	11.68	10.99	12.59
ncbi_101770540	DSK2A	105.83	116.61	120.65	118.74	120	116.84	122.45	100.66	85.45	81.5	87.71	83.41
ncbi_101785158	--	2.42	4.09	5.17	4.65	3.27	3.21	3.64	2.49	1.76	1.63	1.75	1.73
ncbi_101769096	ldhc	0.47	2.16	2.23	3.34	2.4	1.72	1.95	0.87	0.48	0.22	0.09	0.08
ncbi_101785196	CBP	9.63	15.66	12.65	18.06	14.65	12.18	14.43	11.44	10.01	10.29	8.46	8.15
ncbi_101786775	RPM1	1.6	2.88	3.13	4.57	3.67	3.4	3.52	2.39	2.17	1.13	1.48	2.04
ncbi_101768515	GDPD6	62.45	87.16	99.74	121.87	96.88	82.54	93.23	71.6	55.84	12.8	8.61	16.24
ncbi_101785590	PLT4	9.35	14.19	13.96	18.49	17.23	12.93	12.98	10.87	9.7	5.02	4.23	4.79
ncbi_111256589	NPF5.10	1.16	0.82	0.99	1.24	0.71	1.03	0.65	1	0.68	0.35	0.46	0.58
ncbi_101780511	CYP74A1	210.93	191.25	200.64	228.97	171.81	196.05	148.6	194.34	178.37	44.62	21.05	44.44
ncbi_101783912	PK1	4.26	4.63	4.42	6.25	3.82	5.32	4.14	4.87	4.48	1.26	1.41	1.29
ncbi_101756184	At1g34470	28.31	25.78	18.68	34.02	24.97	24.76	18.84	23.86	22.96	13.71	12.97	14.57
ncbi_101763554	--	513.26	685.35	534	860.03	506.07	495.43	274.48	447.98	443.37	174.06	113.99	162.17
ncbi_101764522	TIFY5	46.44	58.62	48.14	88.78	53.7	48.91	34.94	56.99	51.63	6.9	1.67	3.86
ncbi_101752555	PRA1E	54.49	45.23	49.6	49.5	39.23	38.45	39.11	48.05	40.72	33.39	25.23	31.52
ncbi_101761536	--	21.97	22.45	21.12	17.4	11.06	9.49	11.6	15.3	10.01	2.08	2.21	1.94
ncbi_101758948	NDL2	34.7	32.25	35.38	38.42	26.71	36.86	33.06	26.73	21.35	7.45	6.42	9.32
ncbi_101774325	At2g25060	825.44	685.58	646.02	797.64	592.05	594.97	566.29	485.89	411.47	187.15	121.08	253.83
ncbi_101754934	--	9.55	8.16	8.57	8.05	7.9	6.94	8.33	7.82	6.7	4.95	4.06	5.09
ncbi_101758231	GSDA	15.33	10.43	14.33	14.66	11.54	9.27	12.26	9.92	6.97	3.1	4.91	3.41
[truncated: 15,431 more rows]
