# Supplementary material for: Transcriptome-based analysis of key pathways relating to yield formation stage of foxtail millet under different drought stress conditions
Source: Front Plant Sci. 2023 Feb 3;13:1110910. doi: 10.3389/fpls.2022.1110910 (PMC9937063; doi:10.3389/fpls.2022.1110910)
Supplement: Supplementary file 3 [file DataSheet_3.xlsx]

## Sheet: DEGs for WGCNA.xls
TableS5 Differentially expressed genes for WGCNA analysis
Gene id	Symbol	LD-1	LD-2	LD-3	LDCK-1	LDCK-2	LDCK-3	HD-1	HD-2	HD-3	HDCK-1	HDCK-2	HDCK-3
ncbi_101752465	WRKY22	3.73	8.24	5.39	7.9	7.18	10.5	0.7	2.39	1.76	1.09	0.77	0.56
ncbi_101752466	CID11	83.87	56.82	64.42	95.87	98.52	58.19	71.61	79.44	52.94	52.96	50.2	51.93
ncbi_101752467	Os10g0544900	9.15	7.46	8.4	11.82	13.7	11.29	9.52	13.07	13.57	10.98	10.76	11.34
ncbi_101752469	CPP1	7.84	6.73	9.52	5.92	5.86	6.66	18.83	20.99	19.97	26.43	27.08	24.71
ncbi_101752470	HMA9	20.66	20.7	21.96	21.03	24.26	21.24	24.76	25.35	23.71	20.37	19.46	20.98
ncbi_101752471	--	4.65	5.85	7.26	5.37	6.86	5.78	16.07	14.15	14.01	15.69	12.07	13.32
ncbi_101752472	STY46	1.58	1.53	1.45	1.04	1.09	0.98	3.62	1.6	1.19	1.44	1.88	1.23
ncbi_101752474	--	19.6	5.31	2.03	16.87	1.76	1.27	0.46	0.77	0.87	0.12	0.06	0.07
ncbi_101752479	GT4	107.21	22.93	4.58	70.35	40.3	37.3	7.76	8.2	2.92	10.14	13.71	8.81
ncbi_101752481	UBP21	88.18	104.01	80.42	77.85	85	102.06	17.93	38.12	40.81	12.28	13.71	15.47
ncbi_101752484	GALT2	1.78	1.57	2.59	2.41	3.95	4.11	3.9	3.82	3.85	4.2	5.36	4.95
ncbi_101752485	NAC035	15.41	11.56	13.24	13.2	14.78	14.98	30.08	18.23	15.88	18.47	16.13	21.36
ncbi_101752499	MMS19	0.91	0.98	1.73	0.76	1.23	1.3	2.32	3.5	2.25	2.34	2.73	1.95
ncbi_101752502	ARP9	9.98	11.66	12.03	6.79	8.55	8.42	12.3	13.98	14.91	14.39	14.63	13.63
ncbi_101752503	UEV1C	63.31	60.5	67.75	59.43	69.54	64.88	65.13	67.02	60.97	70.91	66.73	77.42
ncbi_101752504	RGA1	0.47	0.4	0.54	0.47	0.93	1.14	1.34	1.51	1.49	2.25	0.94	1.86
ncbi_101752505	STP14	5.75	4.74	5.49	8.28	17.85	19.19	10.88	6.18	5.02	6.06	6.9	6.29
ncbi_101752506	--	24.36	29.77	29.15	38.91	36.33	61.2	43.11	26.75	18.66	13.55	17.1	19.57
ncbi_101752507	ADT6	101.73	76.71	50.82	111.56	75.29	40.4	144.01	206.22	176.46	17.36	23.18	54.4
ncbi_101752510	--	5.46	6.44	5.49	4.15	5.66	4.74	8.15	7.87	9	9.18	8.3	7.02
ncbi_101752511	CRCK3	283.56	311.05	247.33	202.58	236.03	250.27	82.63	121.48	117.58	21.39	40.58	40.24
ncbi_101752512	HSFB2B	12.18	12.35	10.63	12.14	7.63	9.36	17.04	13.66	11.12	19.88	15.25	15.4
ncbi_101752513	EXLA3	2.69	2.42	1.77	3.51	7.16	4.59	4.86	2.16	2.08	1.7	1.47	1.67
ncbi_101752515	CRK6	0.21	0.8	0.45	4.29	4.17	4.38	0.01	0.04	0.05	0.02	0.02	0.02
ncbi_101752516	--	20.18	17.13	20.06	9.17	12.97	13	15.08	26.25	22.29	66.52	64.16	53.65
ncbi_101752517	FRL3	5.4	4.28	6.73	4.91	8.19	6.24	10.92	10.57	9.84	10.94	9.7	11.34
ncbi_101752518	At2g23930	26.56	28.67	43.74	17.48	25.67	29.13	98.28	82.63	69.83	42.15	45.13	51.29
ncbi_101752519	At5g08565	5.64	7.66	7.24	5.96	6.36	7.39	17.78	11.92	12.79	13.84	12.3	15.14
ncbi_101752521	At3g52320	2.9	1.54	2.61	3.59	3.88	3.3	5.41	5.18	4.35	7.01	6.03	7.09
ncbi_101752522	TAP46	11.56	10.82	13.7	10.01	14.3	14.54	17.73	18.56	16.15	26.87	25.64	24.2
ncbi_101752535	SPS5	10.51	9.25	15.51	7.02	6.25	8.96	32.33	23.31	18.56	50.72	39.88	50.79
ncbi_101752538	PMI2	4.41	7.81	9.41	2.97	3.51	3.27	29.49	18.34	18.37	21.89	21.04	18.49
ncbi_101752542	DDB_G0278111	64.81	67.03	74.35	67.06	77.95	77	103	115.93	96.23	102.87	101.97	110.45
ncbi_101752544	ZIP5	0.09	0.43	0.33	1.33	0.56	0.53	0.1	0.11	0	0.19	0.31	0
ncbi_101752546	SKP2A	30.27	30.97	28.86	67.55	55.33	69.17	21.51	21.15	21.67	27.89	34.7	28.8
ncbi_101752551	rpmJ	10.93	11.68	13.85	8.7	12.57	10.6	30.25	24.15	21.25	26.22	20.87	26.24
ncbi_101752552	RPL6	2.41	1.5	3.78	0.66	1.21	1.2	7.41	8.5	7.64	6.67	6.26	7.5
ncbi_101752554	CB5-A	4.16	3.38	5.73	4.84	5.42	4.55	8.29	11.19	8.23	7.29	7.94	5.99
ncbi_101752555	PRA1E	45.23	49.6	54.49	49.5	39.23	38.45	39.11	48.05	40.72	25.23	31.52	33.39
ncbi_101752556	EGY3	130.64	96.05	71.54	118.43	28.36	45.95	42.8	88.23	89.15	91.4	93.13	77.4
ncbi_101752557	--	1.47	2.03	3.77	3.16	2.32	2.43	4.81	5.63	4.2	5.67	5.55	4.51
ncbi_101752559	--	4.34	2.17	2.08	8.36	4.93	2.94	0.84	1.76	2.35	0	0.29	0.53
ncbi_101752563	DIT1	33.51	43.01	36.27	20.67	38.07	39.76	83.24	91.13	97.12	126.23	105.79	140.72
ncbi_101752565	ALATS	58.27	61.91	67.42	51.83	57.38	63.06	65.36	66.21	73.01	84.01	81.99	71.56
ncbi_101752567	CLPP4	7.54	9.46	12.07	4.18	6.14	5.96	5.3	13.52	12.75	18.23	20.67	24.41
ncbi_101752568	PDIL1-5	2.39	2.73	3.1	3.59	3.7	3.08	2.76	2.78	3.37	1.23	1.86	0.91
ncbi_101752569	PUB33	36.53	31.22	18.05	49.25	52.5	51.43	28.75	27.09	29.22	13.9	17.71	19.92
ncbi_101752571	--	0.45	1.24	1.24	0.78	0.71	0.39	2.32	1.8	3.47	1.9	2.06	2.12
ncbi_101752572	ATL3	0.75	0.81	2.12	1.72	3.24	1.93	1.47	1.2	1.52	2.53	2.72	4.31
ncbi_101752573	NPSN13	26.09	25.89	29.91	22.54	28.66	28.57	39.92	36.68	38.27	35.14	37.18	40.17
ncbi_101752574	NUG2	31.14	34.06	53.97	33.94	39.62	41.45	42.19	43.2	43.27	35.03	34.96	39.12
ncbi_101752576	--	1.03	1.11	1.24	1.45	2.01	1.46	2.79	1.8	1.64	0.91	1.42	1.54
ncbi_101752577	TBC1D9B	18.64	17.63	22.62	17.74	22.67	20.69	15.55	16.48	19.65	15.53	15.48	13.75
ncbi_101752578	--	2.91	1.85	4.35	1.53	2.5	2.09	3.49	5.47	4.57	3.06	3.06	3.24
ncbi_101752579	--	0.32	0.87	1.37	0.18	0.49	0.35	1.29	1.72	1.62	1.26	1.06	1.73
ncbi_101752582	GAPB	366.13	431.66	359.62	124.59	169.22	170.16	311.1	474.64	546.96	1316.52	1126.04	1590.09
ncbi_101752587	--	4.31	2.7	5.77	2.2	3.24	3.41	8.78	9.74	10.6	16.1	17.36	14.65
ncbi_101752591	--	4.98	3.63	8.37	3.59	5.98	5.71	12.95	19.9	15.09	14.07	10.97	15.81
ncbi_101752593	LRK10L-2.5	6.5	6.16	3.31	4.07	5.94	7.6	4.19	5.58	5.32	0.92	0.89	0.78
ncbi_101752597	--	7.52	7.11	6.73	7.71	8.62	7.47	7.16	7.87	6.57	8.53	10.64	8.62
ncbi_101752598	Sb03g014480	5.51	5.93	8.82	7.09	8.16	8.11	22.32	20.27	19.27	19.04	24.93	26.53
ncbi_101752599	usf	40.1	37.18	57.87	22.5	31.25	29.36	67.97	66.01	72.36	72.1	76.6	70.89
ncbi_101752602	--	106.32	107.94	126.47	124.51	128.93	109.35	265.6	206.57	183.58	233.89	207.17	222.37
ncbi_101752603	At3g47110	0.55	0.65	0.52	1.97	1.74	1.61	1.02	2.25	0.76	0.5	0.23	1.58
ncbi_101752607	Os11g0285000	0.26	0.33	0.87	0.13	0.4	0.25	0.31	0.23	0.61	0.95	1.09	0.82
ncbi_101752608	LSU1	11.03	16.97	6.56	11.99	14.89	9.83	4.02	4.89	2.51	48.34	12.24	10.47
ncbi_101752610	DAAT	4.36	4.73	4.06	2.49	2.83	3.12	5.12	5.2	6.41	3.26	3.28	4.27
ncbi_101752611	DTX16	0.13	0.2	0.2	0.09	0.17	0.11	2.64	1.62	2.35	0.76	1.04	1.18
ncbi_101752613	--	16.64	15.38	18.72	15.4	20.06	18.05	6.96	9.04	10.12	6.93	7.1	6.62
ncbi_101752618	--	4.75	3.76	4.59	2.19	1.76	2.12	9.73	4.71	3.57	6.41	6.48	5.06
ncbi_101752619	Dnajb4	8.44	7.21	9.28	14.38	16.38	13.8	7.58	6.73	7.29	3.75	4.92	5.4
ncbi_101752620	At1g01500	0.63	1.16	0.85	1.52	1.5	1.23	3.8	2.52	2.62	3.06	4.14	3.44
ncbi_101752621	PNSB4	255.97	297.43	244.35	160.07	223.57	201.42	160.06	164.65	230.3	420.33	361.94	465.55
ncbi_101752622	QUA2	15.4	14.95	18.43	15.59	21.92	17.61	16.98	20.31	19.39	10.39	12.81	16.19
ncbi_101752625	--	1.51	0.85	1.08	1.43	0.91	1.88	0.05	0.3	0.21	0.04	0.21	0.16
ncbi_101752633	--	1.37	1.53	1.82	1.61	1.63	2.17	3.59	3.39	3.4	4.12	5.36	3.06
ncbi_101752635	--	4.19	2.91	4.35	1.29	2.14	1.48	8.06	7.78	6.78	21.44	17.46	14.76
ncbi_101752637	Bx8	18.75	18.01	26.65	7.06	9.07	9.72	18.26	29.18	33.75	58.67	55.99	59.53
ncbi_101752640	FMO1	0.75	0.23	1.33	0.18	0.28	0.35	0.95	1.28	1.81	1.31	1.1	1.13
ncbi_101752642	dapC	12	12.47	16.96	9.76	13.11	11.25	48.05	37	32.67	52.14	47.4	45.26
ncbi_101752644	--	7.96	8.82	10.63	9.5	8.38	11.12	24.79	18.86	18.77	15.43	18.08	15.21
ncbi_101752645	Ufd1	9.37	12.27	10.6	9.44	11.36	10.83	13.48	14.58	14.2	12.73	14.56	15.05
ncbi_101752648	--	0.41	0.11	0.67	0.38	0.56	0.49	2.14	2.29	1.28	2.26	2.48	3.15
ncbi_101752649	AMPD	11.95	6.77	10.6	7.03	5.71	7.08	35.97	22.35	17.44	31.85	30.87	21.73
ncbi_101752659	--	0.27	0.18	0.29	0.03	0.03	0.03	0.91	0.06	0.09	3.03	1.22	1.32
ncbi_101752661	MLO4	0.86	2.41	2	1.13	2.21	1	0.52	0.75	1.17	0.52	0.12	0.73
ncbi_101752662	DJ1D	20.47	20.24	37.14	8.7	9.65	9.56	21.89	29.35	32.77	36.23	37.46	34.74
ncbi_101752663	--	37.21	28.8	38.7	28.09	31.76	33.4	46.96	42.17	29.65	53.92	54.9	45.15
ncbi_101752664	BSL1	30.99	28.25	26.89	47.33	53.84	50.21	27.28	25.65	28.15	29.87	29.05	25.2
ncbi_101752665	ABCG12	6.24	7.52	8.56	5.65	6.86	6.72	14.28	9.93	11.68	8.24	7.03	11.47
ncbi_101752668	NINJA1	10.15	8.85	9.74	7.94	10.88	8.82	14.79	14.41	13.41	17.1	14.81	16.59
ncbi_101752669	EIX2	2.04	1.95	1.71	1.2	1.87	1.3	3.36	4.34	3.42	2.53	0.77	3.18
ncbi_101752672	HDA8	2.92	2.53	3.4	2.77	2.76	3.34	8.09	7.66	5.78	5.78	4.95	6.45
ncbi_101752673	CLA1	20.74	33.8	42.88	16.2	24.85	23.36	38.63	51.67	48.53	66.93	55.74	68.8
ncbi_101752680	At3g09470	0.37	0.44	0.66	0.83	0.9	0.53	0.65	0.3	0.66	0.45	0.74	1.02
ncbi_101752681	--	8.07	9.53	10.38	4.07	8.72	7.26	16.43	19.26	26.46	28.03	23.45	28.13
ncbi_101752682	At3g50780	0.5	0.33	0.78	0.82	1.51	0.74	1.36	1.59	1.75	1.92	1.73	2.12
ncbi_101752685	--	0	0.39	0.9	0.48	1.03	0.7	2.3	2.55	1.82	2.55	3.19	1.4
ncbi_101752687	--	51.7	43.23	55.82	33.81	55.13	51.59	77.32	81.38	87.37	89.31	76.61	96.05
ncbi_101752690	prmC	0.42	0.05	0.98	0.17	0.45	0.29	2.13	1.98	1.4	2.84	1.72	1.9
ncbi_101752691	DTX16	0	0	0	0	0	0	0.03	0	0	0.45	2.47	0
ncbi_101752692	RID1	1.51	1.58	2.56	1.67	1.91	1.97	4.2	5.88	3.97	5.28	4.87	3.9
ncbi_101752694	NTF2	8.12	7.8	12.23	9.26	9.95	9.06	17.31	17.25	20.35	14.31	12.4	10.86
ncbi_101752696	SPBC2A9.03	85.14	101.13	205.17	124.94	248.93	259.62	46.8	50.44	61.69	53.77	64.73	65.06
ncbi_101752701	PSY1R	1.9	1.45	1.26	4.54	3.99	2.46	1.37	1.55	1.46	2.08	1.6	2
ncbi_101752704	--	63.05	56.06	66.62	75.18	75.61	61.49	144.39	111.15	91.81	70.61	76.98	85.61
ncbi_101752710	--	1.64	1.4	1.58	1.23	1.56	2.01	4.57	3.42	4.11	4.01	3.57	3.84
ncbi_101752713	AAT1	9.64	8.41	18.91	14.78	12.21	14.83	26.76	16.29	13.29	29.69	27.43	21.76
ncbi_101752714	--	5.31	6.27	5.45	4.94	4.99	5.44	26.39	19.48	19.11	52.13	42.3	42
ncbi_101752715	At3g47570	0	1.06	0.44	0.55	1.14	0.68	1.39	0.75	1.63	1.41	0.56	1.68
ncbi_101752717	--	0.14	0	0.2	0	0.04	0	0.21	0.16	0	0.14	0.13	0
ncbi_101752718	--	1.72	2.57	3.78	1.24	2.94	1.92	5.02	6.78	6.82	7.27	8.32	8.48
ncbi_101752719	At1g17350	6.23	6.12	7.11	5.15	6.47	5.05	11.64	11.4	8.94	11.85	11.47	9.24
ncbi_101752721	CALS12	0.83	0.66	1.97	0.63	1.06	0.89	3.42	5.19	4.99	5.81	6.84	4.73
ncbi_101752722	At1g27050	1.63	1.26	1.66	1.12	2.11	1.41	4.26	5.01	5.24	7.22	6.41	6.88
ncbi_101752723	PAE5	3.98	5.27	9.83	3.97	8.35	5.67	10.94	8.2	6.96	13.21	13.98	12.2
ncbi_101752724	UGT73C6	1.84	1.71	1.27	0.49	0.39	0.57	1.02	1.39	1.53	1.63	2.44	1.85
ncbi_101752725	SBP1	168.78	139.14	136.48	304.17	195.1	186.77	179.41	138.81	165.76	141.76	124.66	131.45
ncbi_101752726	UBC27	23.97	26.08	30.74	19.38	22.62	23.32	34.3	28.82	31.7	20.32	20.77	26.06
ncbi_101752731	--	4.52	6.5	4.51	3.58	4.45	3.37	2.78	4.59	7.28	14.48	11.72	11.78
ncbi_101752732	--	21.83	33.86	21.59	14.48	24.32	22.68	8.07	19.11	24.63	21	18.6	24.63
ncbi_101752734	GLYR1	46.98	59.15	72.06	22.79	37.62	30.07	32.67	41.95	47.92	80.21	78.66	84.33
ncbi_101752738	FDX1	110.01	106.6	106.81	52.87	68.13	55.35	371.16	610.2	649.2	920.02	788.5	1112.59
ncbi_101752739	ATL1	2.19	2.85	5.67	4.04	5.15	4.85	2.68	3.04	4.3	2.79	2.83	2.24
ncbi_101752740	Os02g0717700	1.1	0.5	0.72	0.95	1.2	1.6	1.69	1.57	1.66	1.54	1.63	0.93
ncbi_101752741	CAS	38.67	38.32	37.13	12.96	20.78	16.3	15.83	25.36	26.05	69.15	61.27	84.21
ncbi_101752742	CPR5	3.11	2.37	3.71	2.64	3.95	3.39	5.13	4.69	2.97	4.86	5.07	3.73
ncbi_101752744	dnaJ	114.56	101.56	106.07	95.35	96.37	102.72	87.24	73.42	72.97	81.78	77.77	59.02
ncbi_101752745	OSH45	3.94	3.05	3.3	1.3	1.19	0.93	5.23	5.38	6.03	6.12	9.47	8.04
ncbi_101752746	--	1.66	2.11	1.64	1.58	1.63	1.03	1.82	2.12	1.22	1.49	1.71	1.93
ncbi_101752747	BRL3	13.2	11.89	7.59	11.96	7.39	8.19	6.17	5.71	5.71	3.7	4.51	2.49
ncbi_101752749	PYRC	1.08	2.12	2.6	1.15	1.63	1.22	3.43	2.12	2.67	1.69	1.82	2
ncbi_101752750	PSMG3	15.94	15.54	20.55	12.59	15.29	15.81	23.95	23.58	23.1	20.92	31.5	21.67
ncbi_101752752	SPBC2A9.03	28.83	14.73	14.26	38.82	12.87	14.2	17.68	16.84	17.66	27.24	37.39	21.54
ncbi_101752757	CXE15	1.11	0.26	0	20.48	3.54	6.79	0	0	0	0.21	0	0.21
ncbi_101752761	FK	5.04	8.1	7.58	3.16	5.42	4.83	15.11	12.18	12.25	9.53	8.8	9.83
ncbi_101752763	SAD2	28.05	29.46	27.39	25.13	26.11	26.27	24.14	27.13	27.83	29.44	28.34	24.43
ncbi_101752766	--	1.35	1.14	0.46	0.88	0.78	0.66	0.71	1.12	1.47	1.18	1.2	0.95
ncbi_101752767	MGAT3	10.77	12.3	16.03	26.08	26.96	28.2	50.73	38.28	32.91	62.59	40.27	56.81
ncbi_101752768	UPL5	4.07	2.99	3.66	6.21	6.21	5.49	8.19	7.51	6.48	9.92	10.2	8.45
ncbi_101752769	FT	5.48	6.06	3.14	1.73	2.25	3.27	0.12	0.86	0.49	0.7	1.24	1.92
ncbi_101752770	IPUT1	34.15	27.37	24.25	48.32	41.28	42.6	33.35	28.87	24.46	25.89	26.05	26.93
ncbi_101752773	B0103C08-B0602B01.13	4.08	4.29	3.67	3.95	4.26	4.68	5.66	5.14	4.16	5.06	5.12	4.25
ncbi_101752776	--	1.73	2.34	3.2	1.89	3.01	2.04	3.44	4.82	3.69	5	4.59	4.21
ncbi_101752777	GATA23	4.63	3.38	3.78	8.62	9.34	6.24	7.87	6.7	6.84	15.71	14.52	13.71
ncbi_101752780	NAC077	15.32	11.31	14.98	53.66	35.61	37.97	18.34	10.77	6.89	7.81	10.45	5.34
ncbi_101752793	--	0.22	0	0.67	0	0	0	0.08	0.13	0.03	0.64	1.04	0.67
ncbi_101752795	SIN2	1.42	1.71	2.27	1.01	0.96	0.86	4.62	4.78	4.71	4.96	4.32	4.46
ncbi_101752796	NOM1	1.43	1.45	1.61	1.12	1.56	1.49	4.29	4.29	3.31	3.51	3.17	3.42
ncbi_101752797	MAK3	3.23	3.76	4.03	3.41	3.34	4.29	8.84	8.82	6.28	6.16	6.85	8.36
ncbi_101752798	--	17.35	17.33	17.14	17.27	21	20.26	19.93	19.86	19.38	29.29	28.18	23.03
ncbi_101752800	VSPA	0	0.44	3.36	0	0.15	0	0.15	0.4	0.68	0.05	0.21	0.28
ncbi_101752803	ubtd2	8.07	8.21	14.59	7.5	10.01	8.46	21.98	19.15	17.38	25.01	20.12	19.54
ncbi_101752807	XYP11	1.02	0.85	0.68	1.02	0.91	0.96	0.5	0.35	0.41	0.18	0.58	0.35
ncbi_101752813	SIGF	20.68	24.32	25.45	12.43	16.53	18.71	10.2	18.63	28.45	39.53	38.77	43.32
ncbi_101752814	At4g15970	72.38	71.23	106.97	79.45	90.46	101.98	77.96	76.53	90.79	23.81	25.09	31.94
ncbi_101752816	GIP1	0.73	0.51	0.49	0.78	1.31	0.7	1.8	1.52	0.69	1.85	0.55	0.99
ncbi_101752817	EGY1	13.1	11.75	15.55	19.08	22.45	19.05	15.71	17.8	19.37	21.89	23.2	27.47
ncbi_101752818	RF45	0	0	0	0	0	0	0	0	0	0.06	1.05	0
ncbi_101752819	SAPK8	25.62	23.34	34.53	26.05	33.02	28.34	42.44	39.63	41	45.92	38.77	47.27
ncbi_101752822	EMB1467	36.57	32.43	39.58	27.94	33.54	31.67	69.46	66.16	66.68	81.26	74.32	75.3
ncbi_101752826	CYP76B10	0.55	0.15	0.27	1.55	1.28	1.4	0.42	0.03	0	0.11	0	0
ncbi_101752828	--	0.88	1.44	0.57	0.44	1	0.89	0.4	0.65	1.41	0.94	1.42	0.53
ncbi_101752830	TIFY11F	11.81	16.43	22.06	19.65	13.64	7.89	0.91	11.74	13.3	0.23	0.4	0.22
ncbi_101752832	spast	31.04	31.03	30.57	36.23	36.99	31.67	39.28	30.1	31.83	34.86	32.98	29.8
ncbi_101752833	ZCYB	1.16	1.02	0.63	2.4	1.98	1.29	0.49	0.47	0.35	0.28	0.59	0.27
ncbi_101752837	At1g03370	18.72	18.38	12.81	16.28	16.36	16.47	6.58	8.78	8	6.74	7.52	6.99
ncbi_101752839	DIM	0.54	0.2	0.51	0.47	0.53	0.65	2.22	2.44	2.16	1.49	1.62	1.18
ncbi_101752840	THI1-2	69.04	31.44	52.36	94.86	115.64	107.95	23.87	25.23	41.89	8.3	8.96	25.25
ncbi_101752841	TBP2	108.99	110.83	119.99	142.24	143.19	135.3	87.26	95.51	92.84	80.13	89.36	89.84
ncbi_101752842	CLO	5.23	5.79	8.38	2.64	4.7	3.71	14.33	18.82	15.96	14.21	13.65	12.83
ncbi_101752843	At4g17486	16.36	16.73	15.77	15.68	18.19	18.82	15.59	15.07	18.98	10.5	10.97	13.3
ncbi_101752845	--	2.76	4.78	4.21	2.62	3.35	3.49	22.91	27.32	48.03	11.17	10.18	8.22
ncbi_101752847	--	1.08	0.62	0.47	1.08	0.59	0.94	1.33	0.8	0.65	1	0.68	1.05
ncbi_101752848	DTX27	10.28	9.22	5.94	9.7	8.18	10.26	1.16	0.97	1.71	1.87	2.19	3.67
ncbi_101752851	ALIS1	0.9	1.13	0.99	0.68	0.91	1.01	0.97	1.22	1.5	1.74	2.5	1.67
ncbi_101752862	ABCI7	19.26	19.53	20.36	17.99	22.65	20.12	39.17	48.58	42.51	39.35	43.25	42.36
ncbi_101752864	UBP14	14.07	16.27	20.92	12.88	14.71	15.41	24.58	25.91	27.02	25.14	25.32	25.47
ncbi_101752866	OVA9	24.64	29.84	22.54	23.17	25.08	24.17	19.99	25.12	25.85	20.91	20.54	18.03
ncbi_101752868	sec23a	6.9	7.03	8	7.61	10.12	9.67	10.48	10.02	10.74	8.29	9.61	8.47
ncbi_101752870	B'KAPPA	3.26	5.21	5.78	2.46	5.88	3.07	2.28	4.25	5.51	3.94	2.46	5.41
ncbi_101752871	WAK3	1.62	1.35	1.81	0.28	0.33	0.27	3.06	2.53	2.75	1.1	3.67	2.94
ncbi_101752872	fmdA	5.97	8.24	8.88	6.68	8.36	8.4	8.06	8.11	11.67	3.46	3.6	3.15
ncbi_101752874	SKIP24	4.12	2.73	3.96	5.58	7.4	6.03	8.76	6.12	5.26	8.38	8.63	7.53
ncbi_101752875	CRCK1	0.44	0.27	0.34	0.3	0.15	0.09	1.27	1.17	1.71	0.22	0.66	0.18
ncbi_101752876	--	0.38	0	0	0	0	0	1.62	1.09	0.36	0.3	0.18	0.39
ncbi_101752877	PEPC	43.48	35.4	41.6	54.56	53.66	56.96	134.6	84.19	74.96	62.36	53.06	67.56
ncbi_101752878	RAM1	9.05	5.39	7.38	5.82	6.98	5.82	2.08	5.09	7.66	10.45	7.19	14.22
ncbi_101752879	yif1b-b	6.67	4.61	9.98	6.43	9.94	8.56	14.33	11.37	15.18	10.98	10.02	12.18
ncbi_101752880	Os01g0953600	27.42	30.99	35.16	42.27	45.12	46.1	33.23	37.33	32.71	28.61	26.72	30.88
ncbi_101752881	CIN4	6.37	6.94	10.41	5.19	5.31	5.02	8.48	7.36	6.38	8.58	7.94	10.3
ncbi_101752882	REX4	0.14	0.12	0.08	0.03	0	0.06	1.86	3.36	0.96	1.07	0.95	1.99
ncbi_101752885	FAR1	3.55	3.11	4.3	3.28	4.24	3.81	3.46	4.92	4.19	6.94	6	4.97
ncbi_101752887	CDKG-1	145.31	116.61	79.35	120.29	78.18	89.47	25.77	37.13	35.77	35.91	33.44	26.62
ncbi_101752888	--	25.75	32.07	29.18	20.84	27.36	27.61	15.8	21.26	24.79	28.21	29.17	30.58
ncbi_101752890	XTH8	9.73	7.58	125.92	5.49	8.64	8.05	10.1	22.9	16.62	23.82	54.89	43.86
ncbi_101752891	At5g14170	9.84	7.93	13.29	7.84	12.03	10.13	20.04	21.09	18.91	16.34	17.74	19.41
ncbi_101752892	purH	4.58	6.06	6.94	3.95	3.87	6.3	8.69	10.13	9.72	15.14	13.61	9.43
ncbi_101752895	At1g30440	6.84	7.8	9.88	5.31	6.94	6.41	16.63	19.57	21.36	20.35	22.46	23.17
ncbi_101752896	D27	27.2	21.31	26.05	5.3	7.73	6.57	33.77	52.23	48.9	133.91	121.22	114.73
ncbi_101752898	PSA2	67.1	65.96	63.14	35.53	52.35	45.5	30.71	55.86	59.6	77.57	80.05	96.96
ncbi_101752899	--	29.38	33.89	45.18	28.39	37.26	35.73	66.13	46.7	45.82	71.35	71.68	71.58
ncbi_101752900	At5g51130	0.33	0.58	0.79	0.89	0.59	1.05	3.33	3.53	2.88	1.83	1.97	2.01
ncbi_101752908	Os07g0143700	1.14	0.87	1.72	1.36	1.39	1.67	1.92	2.4	2.42	3.15	3.59	2.6
ncbi_101752909	LFG2	32	26.01	25.48	56.23	43.41	52.93	21.35	28.74	27.88	20	26.02	27.19
ncbi_101752911	D2HGDH	9.37	14.29	21.01	10.52	17.22	11.72	17.8	17.35	19.92	26.75	24.5	20.21
ncbi_101752913	--	15.54	14.52	18.09	13.08	18.67	18.85	20.71	20.58	20.31	21.92	20.91	21.62
ncbi_101752914	PPT1	1.74	2.07	3.57	1.43	1.22	1.05	5.61	5.64	6.77	2.86	5.12	3.83
ncbi_101752915	memo1	7.23	7.92	9.26	5.64	6.08	7.36	15.35	12.28	12.09	12.97	17.81	13.69
ncbi_101752916	BPG2	0.97	0.6	0.67	0.64	1.03	0.92	1.87	1.63	1.62	1.75	1.68	1.39
ncbi_101752917	--	1.13	1.09	2.63	0.9	1.95	1.48	2.31	2.4	1.67	1.94	1.92	1.97
ncbi_101752919	trappc4	3.71	3.24	5.31	2.05	2.76	3.14	6.09	5.45	5.32	4.87	5.16	5.24
ncbi_101752920	FRS11	0.93	0.39	0.9	0.72	1.18	0.96	1.54	1.94	2.24	2.75	2.68	2.18
ncbi_101752921	--	23.42	22.5	24.03	30.44	29.13	23.21	19.77	19.6	17.72	22.36	22.76	26.76
ncbi_101752923	NAC100	2.53	2.41	4.26	6.05	8.52	6.96	4.45	4.78	5.11	3.63	3.34	4.29
ncbi_101752924	PBL19	0.27	0.06	0.18	0.27	0.07	0.33	3.23	0.46	0.18	0.82	0.48	0.42
ncbi_101752926	FRS6	2.11	1.81	2.92	2	3.54	2.19	4.74	5.52	5.52	7.45	6.83	5.66
ncbi_101752927	RBG3	15.75	13.63	19.14	14.82	17.27	15.82	20.08	17.1	20.87	25.29	26.52	23.67
ncbi_101752929	GH3.8	101.83	119.18	68.23	170.66	130.21	140.47	24.88	58.35	64.38	14.35	24.8	21.26
ncbi_101752930	RPS3C	25.79	24.77	32.44	31.23	38.82	31.75	65.87	76.19	57.8	63.47	48.38	65.25
ncbi_101752931	SC35	35.19	29.1	28.91	32.61	23.53	23.74	44.14	42.84	40.89	56.19	55.48	44.97
ncbi_101752933	--	5.03	5.93	6.4	2.62	3.95	4.45	13.96	14.57	10.6	12.6	12.04	11.33
ncbi_101752934	CML36	17.25	19.08	16.42	15.48	29.92	25.68	13.84	16.24	10.53	5.29	6.55	5.83
ncbi_101752936	At2g04230	0.68	0.4	0.39	0.87	0.86	0.64	1.67	1.33	1.09	1.37	0.34	1.45
ncbi_101752941	WAK2	0.24	1.63	2.12	2.07	2.4	3.22	7.41	7.73	5.28	0.75	2.12	2.91
ncbi_101752944	--	51.04	47.08	59.09	56.66	69.23	64.94	42.61	45.54	56.71	60.88	58.88	66.33
ncbi_101752950	ALY3	25.54	22.91	26.49	16	17.69	18.51	21.88	21.82	24.6	28.42	28.21	25.5
ncbi_101752951	SOT18	13.09	13	14.19	11.5	10.98	19.9	4.72	11.44	10.94	20.48	14.65	20.77
ncbi_101752952	--	2.5	1.42	1.99	3.24	2.94	2.35	5.44	4.18	4.3	7.22	5.96	6.31
ncbi_101752955	--	11.13	7.53	8.74	17.67	16.6	14.96	18.58	18.81	14.33	11.96	13.65	12.85
ncbi_101752961	CRK26	0.2	8.93	8.23	12.87	12.98	11.32	5.07	7.23	6.62	2.51	2.52	3.76
ncbi_101752963	--	13.86	17.45	22.82	15.29	18.08	17.07	37.21	34.96	33.47	39.64	33.23	33.14
ncbi_101752964	At5g12190	22.06	16.53	25.38	16.92	22.41	19.06	34.41	35.2	26.17	30.61	25.1	28.8
ncbi_101752965	HCS1	5.18	3.87	2.89	1.93	1.82	2.37	3.79	4.64	4.89	5.57	5.13	4.59
ncbi_101752966	MADS34	2.04	1.98	1.79	1.28	1.99	1.81	3.05	3.16	3.19	7.65	6.04	8.79
ncbi_101752968	BHLH74	0.1	0.18	0.21	0.08	0.34	0.17	0.69	0.75	0.84	1.01	0.34	0.65
ncbi_101752970	--	103.16	204.21	186.67	717.78	172.23	406.64	113.51	261.97	125.98	45.63	96.86	68.85
ncbi_101752972	At1g60995	25.03	27.09	28.95	26.21	31.59	29.64	40.11	33.04	27.87	40.95	37.54	36.26
ncbi_101752973	MED19A	11.35	8.95	11.31	8.15	11.52	9.1	16.32	17.39	16.14	20.29	19.9	17.49
ncbi_101752979	GME-1	78.75	77.39	72.71	119.21	135.04	133.42	106.46	89.11	80.55	103.86	79.64	126.38
ncbi_101752981	CDKE-1	14.26	14.8	15.92	11.63	13.36	12.86	20.08	17.22	19.96	19.99	18.72	21.45
ncbi_101752982	--	0.56	0.92	1.71	0.56	0.93	0.48	8.28	9.38	9.95	3.42	2.07	2.54
ncbi_101752983	SARD4	3.42	2.18	2.81	1.77	2.91	2.34	4.91	5.42	3.62	3	3.48	2.71
ncbi_101752984	--	0.39	0.45	0.39	0.6	0.58	0.61	1.23	1.47	1.19	1.3	1.43	1.56
ncbi_101752986	acyP	2.64	1.72	2.48	2	1.73	0.9	4.92	5.82	3.78	11.67	9.23	8.45
ncbi_101752988	AHL10	2.54	2.22	3.61	1.62	1.96	2.66	5.75	5.3	5.77	1.93	3.26	3.48
ncbi_101752989	Nop56	3.06	2.66	5.92	2.83	3.42	3.7	25.99	33	26.62	16.62	15.31	14.32
ncbi_101752990	At5g55050	3.02	4.27	2.16	1.18	2.23	2.12	11.28	11.88	21.85	2.35	2.42	1.97
ncbi_101752991	LEA17	0.66	0.54	1.15	1.16	0.76	1.29	0.56	0.51	0.77	0.26	0.42	0.33
ncbi_101752992	NCBP	28.64	30.39	34.55	23.34	32.42	31.76	45.53	49.15	39.88	43.33	46.22	50.37
ncbi_101752993	PAP3	46.86	35.24	65.7	34.97	43.47	39.39	166.75	93.54	77.68	141.66	122.28	122.91
ncbi_101752997	RRP44A	7.17	10.82	12.25	5.84	7.78	9.26	12.59	13.58	14.7	16.28	16.55	13.32
ncbi_101752998	NFXL1	266.84	340.33	192.76	142.41	125.62	179.47	67.9	75.09	82.99	61.03	88.59	66.41
ncbi_101753006	RDN2	2.39	1.77	2.28	3.83	2.88	2.65	5.68	3.98	3.59	2.3	1.9	1.88
ncbi_101753008	--	2.81	3.35	3.38	2.69	3.75	3.61	2.86	2.88	2.6	3.5	3.26	2.99
ncbi_101753011	Os05g0310800	11.68	11.54	15.14	8.39	10.82	10.13	19.97	23.49	21.02	18.44	19.75	19.81
ncbi_101753012	At3g52670	1.59	1.36	2.05	2.4	0.99	0.94	2.77	2.9	2.44	2.82	4.08	2.51
ncbi_101753013	AFC3	14.97	17.11	20.93	10.49	10.51	10.83	26.96	17.25	22.88	19.64	17.24	17.53
ncbi_101753014	--	24.57	10.72	12.44	39.63	16.62	20.06	20.68	13.63	4.84	9.8	14.69	7.7
ncbi_101753015	--	117.23	121.55	136.56	72.84	110.28	88.41	95.92	121.02	138.45	212.48	208.61	237.97
ncbi_101753018	--	1.63	2.27	4.39	1.73	3.4	1.62	11.07	8.64	9.86	12.36	11.43	9.82
ncbi_101753019	SPL3	5.18	6.31	6.28	0.9	2.15	1.74	5.42	5.37	8.25	15.32	14.89	12.13
ncbi_101753020	BAM8	6.41	5.97	7.78	1.97	2.86	3.38	8.26	7.32	9.18	9.23	10.72	8.47
ncbi_101753022	TOL9	32.67	36.19	38.15	45.37	48.65	50.62	42.56	44.67	42.45	32.93	34.12	31.85
ncbi_101753024	ostc-a	5.7	5.6	5.11	8.8	10.61	7.5	15.6	13.86	12.51	10.28	9.71	12.73
ncbi_101753029	PIP2-4	5.56	6.62	8.66	7.49	5.83	6.87	24.54	25.7	18.58	21.69	20.65	17.43
ncbi_101753032	Os02g0755200	1.51	1.67	2.78	1.36	2.2	1.55	1.53	2.22	1.51	2.3	1.92	1.78
ncbi_101753035	RLP34	1.83	0.61	1.07	1.56	1.11	1.83	3.01	2.46	3.44	4.25	2.56	2.62
ncbi_101753036	--	2.65	2.36	2.18	3.95	3.7	3.33	4.94	2.96	2.42	2.15	2.06	1.85
ncbi_101753039	OsI_029135	20.83	17.35	16.67	25.24	24.17	20.84	35.31	31.93	27.88	28.16	28.95	26.95
ncbi_101753040	tmem50	7.95	8.05	12.64	6.34	6.1	6.79	11	12.01	11.7	10.38	12.74	15.77
ncbi_101753043	At3g49030	2	2.49	2.58	1.75	2.44	2.55	1.59	2.19	1.97	3.18	1.94	2.46
ncbi_101753044	QCR7-2	20.18	19.4	29.27	12.11	12.76	11.52	77.49	73.44	62.34	91.49	82.77	51.41
ncbi_101753046	AAK6	0.48	1	1.52	1.25	1.01	0.88	6.26	7.41	4.24	3.73	3.87	3.34
ncbi_101753052	FLZ17	36.52	22.89	49.02	13.29	9.97	12.48	661.33	381.09	223.64	834.21	531.07	526.86
ncbi_101753053	--	10.79	8.23	5.18	14.06	9.94	10.18	4.77	5.12	4.83	5.6	6	5.63
ncbi_101753054	--	16.97	18.44	32.72	8.72	10.55	11.22	35.21	29.55	30.56	30.68	38.1	38.53
ncbi_101753055	ROPGAP3	15.1	17.33	35.97	12.51	14.58	12.71	9.42	20.15	26.04	6.27	7.99	10.67
ncbi_101753057	--	0.3	0.09	0.99	0.67	0.82	0.55	1.41	1.01	1.1	0.97	0.27	0.52
ncbi_101753058	Stxbp5	9.29	6.94	8.53	6.93	7.62	7.16	13.8	11.63	12.89	14.37	14.5	10.72
ncbi_101753065	Os04g0533700	0.28	0.15	0	0.23	0.06	0.06	0.31	1.2	0.57	0.07	0.38	0.35
ncbi_101753069	PAP22	1.08	0.17	0.9	1.87	3.21	4.66	2.11	0.56	0.22	0.53	0.62	0.24
ncbi_101753072	PAO4	1517.1	1451.57	1697.35	1413.79	1825.99	1525.87	806.79	911.05	1024.38	376.55	475.64	547.28
ncbi_101753074	CYP71D55	0.06	0.17	0	0.15	0.23	0.35	0.35	0.84	1.41	0.48	2.3	0.28
ncbi_101753075	XPD	5.53	4.68	5.33	4.56	4.33	4.77	7.18	7.08	7.04	6.26	7.4	5.83
ncbi_101753076	At4g24830	25.17	28.18	32.67	68.66	63.96	77.94	76.88	68.31	52.58	34.32	32.72	34.66
ncbi_101753078	RGA5	11.22	4.69	0.01	0	0.04	0	0	0.04	0.06	5	18.93	0
ncbi_101753084	--	92.92	83.47	96.04	81.43	88.01	81.25	45.96	43.69	40.39	32.44	32.41	31.19
ncbi_101753085	BX7	3.55	4.55	5.59	2.71	4.52	2	4.18	4.37	4.65	1.02	1.34	2.42
ncbi_101753087	At1g06800	0.63	0.47	0.46	0.59	0.66	0.57	0.99	2.86	3.74	0.51	0.53	1.16
ncbi_101753092	At3g09470	9.72	9.64	15.04	7.13	8.53	7.69	13.89	13.28	14.25	13.74	11.24	13.65
ncbi_101753093	--	3.43	1.69	3.34	2.02	2.96	1.97	6.1	5.06	4.97	3.85	4.01	4.47
ncbi_101753094	--	2.24	1.32	0.8	1.66	0.73	1.52	0.3	0.54	0.28	0.09	0.08	0.04
ncbi_101753095	SAAL1	0.74	0.49	1.47	0.48	0.43	0.61	1.59	1.34	1.27	1.16	1.14	1.2
ncbi_101753097	GA20OX3	0.32	0	0.29	0	0.1	0.1	0.09	0.59	0.52	1.27	0.73	1
ncbi_101753098	NRPB6B	13.66	12.79	22.44	9.25	12	13.6	41.8	33.68	29.98	26.88	32.14	32.2
ncbi_101753102	--	5.29	5.32	4.92	3.74	5.07	4.25	3.95	3.85	4.4	6.23	6.98	4.53
ncbi_101753103	--	0	0.31	0.17	0.05	0.38	0.15	0.33	0.35	0	1.07	3.86	0.29
ncbi_101753104	RPT1A	39.07	34.74	39.32	37.42	41.3	38.39	58.55	52.22	54.64	52.58	47.94	57.47
ncbi_101753105	--	1.18	1.36	2.96	0.89	1.65	3.14	6.83	9.88	6.86	2.78	3.63	2.55
ncbi_101753106	--	0.26	0.19	1.47	0.29	0.29	0.53	4.85	3.99	2.92	3.79	2.88	2.39
ncbi_101753107	Os03g0419100	4.66	4.22	10.21	8.75	10.17	8.62	14.6	11	10.59	11.74	10.67	13.56
ncbi_101753108	Os03g0337600	22.07	21.13	25.76	17.75	21.83	19.7	23.59	28.99	32.82	49.84	46.42	49.63
ncbi_101753111	PRXIIE-1	5.99	4.24	7.57	4.49	3.44	4.73	32.53	23.32	19.27	13.46	13.3	13.16
ncbi_101753112	ABCA7	9.02	8.35	6.28	9.04	8.66	6.13	10.43	5.29	5.92	5.79	6.04	1.83
ncbi_101753114	PAA2	21.92	24.83	24.24	10.46	13.18	14.32	24.02	30.75	35.61	66.29	64.14	55.15
ncbi_101753116	--	13.13	11.66	14.09	9.37	12.84	10.38	10.51	12.98	12.18	11.42	13.82	13.52
ncbi_101753118	WEL3	1.06	1.27	0.83	1.72	1.52	1.51	0.71	1.27	1.16	3.39	3.82	3.47
ncbi_101753121	HKT9	0.27	0.39	0.89	0.47	1.77	1.13	3.73	1.57	1.07	1.65	1.41	1.87
ncbi_101753124	XRN3	5.99	7.11	9.73	2.94	4.65	4.87	11.46	12.74	13.39	13.83	13.51	9.77
ncbi_101753128	--	0.42	1.54	1.39	0.58	0.56	0.86	1.59	1.01	0.81	1.15	0.32	2.01
ncbi_101753129	NAA50	2.32	2.74	4.63	3.09	4.59	4.65	10.71	10.73	7.05	8.9	6.8	7.34
ncbi_101753130	HSP15.7	0	0	0	0	0.24	0	0.08	0	0.2	0	0.07	0.07
ncbi_101753131	ABCB11	17.4	26.77	14.74	44.81	32.61	26.5	18.07	16.77	13.98	15.76	16.1	11.82
ncbi_101753132	--	1.89	1.87	2.47	6.09	13.47	13.46	7.72	2.41	1.89	3.47	5.96	3.49
ncbi_101753133	IAA6	21.61	13.99	29.73	30.23	43.25	29.48	70.46	40.89	31.16	68.39	65.26	60.33
ncbi_101753134	VIP1	0.34	0.02	0.23	0.1	0.1	0.14	7.58	3.38	0.76	3.89	2.72	0.86
ncbi_101753135	PAE5	2.05	1.82	2.71	2.41	3.31	2.46	6.65	4.17	4.34	3.88	3.43	3.25
ncbi_101753136	UGT73C3	21.24	3	2.16	61	30.14	16.07	2.27	4.64	5.59	14.75	14.44	14.54
ncbi_101753137	TIFY9	0.63	0	0	0.05	0	0	1.92	0.17	0	0.39	0.23	0
ncbi_101753139	--	12.21	13.03	16.08	16.55	14.66	17.81	30.97	28.94	28.39	28.09	30.12	23.62
ncbi_101753142	TPS26	0.19	0.18	0.71	0.09	0.02	0.02	0.88	0.95	0.36	2.19	2.05	1
ncbi_101753145	MLO1	248.74	403.69	272.3	153.92	180.13	170.44	38.15	63.57	54.3	9.95	13.85	20.44
ncbi_101753148	TIP2-1	3.5	3.6	2.19	3.55	2.91	3.23	20.42	12.73	13.36	23.47	15.62	10.14
ncbi_101753149	FAB1D	53.38	47.17	45.75	62.93	83.07	76.75	21.02	24.66	24.77	23.49	23.29	18.45
ncbi_101753150	ERF025	34.87	61.44	145.48	30.23	34.76	19.02	9.25	36.21	54.18	9.07	15.31	8.55
ncbi_101753151	RPL31	50.68	38.03	60.61	58.11	67.16	58.13	120.4	173.67	148.06	104.39	97.34	119.65
ncbi_101753152	HOX16	35.7	39.86	54.54	70.08	133.13	103.43	40.65	43.34	37.78	58.74	60.7	73.93
ncbi_101753153	PDE247	0.32	0.16	0.21	0.28	0.24	0.35	0.94	0.71	0.93	1.77	1.76	1.36
ncbi_101753154	LHT1	252.71	278.35	243.14	185.92	307.63	285.17	108.09	115.68	122.46	43.32	54.97	67.29
ncbi_101753155	HSP18.6	159.21	99.23	48.98	69.06	6.93	11.31	59.33	47.06	57.59	83.76	77.03	65.6
ncbi_101753157	AKHSDH1	1.5	1.92	3.24	1.42	1.65	1.97	5.7	6.74	6.4	5.61	5.43	4.14
ncbi_101753158	prp39	8.5	8.77	8.85	6.54	8.78	7.54	6.53	8.23	8.71	8.47	8.44	8.48
ncbi_101753159	--	12.99	9.79	20.01	6.34	6.66	6.3	80.01	68.57	52.71	82.12	71.04	44.7
ncbi_101753161	ROMT-15	76.12	82.51	111.22	116.4	172.42	107.35	146.38	129.06	93.52	21.98	28.58	42
ncbi_101753163	--	0.08	0.08	0.11	0.51	0.65	1.22	1.41	1.09	0.43	1.04	2.35	2.28
ncbi_101753164	Os08g0191100	139.22	108.17	115.87	214.41	171.26	181.51	429.63	186.77	145.1	338.39	334.52	199.81
ncbi_101753168	CXE15	0.34	0	0.17	1.69	2.62	1.91	0.17	0.77	0.32	0.27	0.07	0.38
ncbi_101753169	ADT6	62.06	32.46	33.85	136.62	98.29	70.04	54.29	47.47	45.73	12.31	13.15	26.86
ncbi_101753170	--	2.29	1.57	2.84	1	1.66	1.35	4.77	3.96	4.41	4.05	6.66	4.07
ncbi_101753171	--	56.48	51.05	54.18	59.16	68.43	60.39	74.21	73.73	70.31	57.66	53.03	58.87
ncbi_101753172	eef1aknmt	3.43	2.86	3.81	1.46	2.34	1.82	8.21	8.97	8.65	5.69	5.34	4.49
ncbi_101753176	--	0.71	0.13	0.73	0.44	0.34	0.1	0.27	1.55	1.31	1.33	2.05	0.48
ncbi_101753177	ALG10	1.38	1.25	2.19	1.68	1.74	1.98	2.86	3.39	3.23	3.28	3.28	3.6
ncbi_101753178	PTI13	16.83	19.99	21.11	24.79	24.4	23.63	27.12	29.37	28.57	36.03	36.36	35.89
ncbi_101753179	Rnf5	3.15	3.58	4.72	6.57	7.81	4.83	7.58	6.13	5.85	9.23	7.88	8.75
ncbi_101753181	PIP2-7	3.91	4.21	4.53	5.28	10.06	6.24	26.65	22.07	35.34	4.01	4.27	4.47
ncbi_101753182	CPK12	1.66	2.16	1.27	0.86	1.16	1.34	1.54	2.37	2.29	1.46	1.3	1.41
ncbi_101753183	ILR3	30.21	33.69	16.99	36.73	49.06	44.42	43.01	38.9	39.95	51.81	45.48	46.84
ncbi_101753184	At1g56140	2.84	2.96	4.76	6.44	6.06	6.27	1.78	3.28	2.41	6.31	23.17	1.52
ncbi_101753185	LHBC	13.45	17.31	13.4	5.86	15.49	7.41	30.7	44.51	48.64	112	93.69	101.65
ncbi_101753186	CYCP1-1	0.6	0.52	0	0.54	0.35	0.1	1.15	0.84	0.78	3.46	3.9	4.25
ncbi_101753190	--	22.04	37.75	34.59	12.25	25.03	22.43	15.7	28.51	26.39	2.17	5.73	6.84
ncbi_101753191	--	41.57	35.36	48.24	27.06	28.94	29.73	84.52	83.45	82.33	97.97	93.52	89.01
ncbi_101753192	EIF2B	27.2	21.39	30.83	20.73	26.79	26.39	49.77	61.86	54.98	53.23	54.69	61.25
ncbi_101753193		0.09	0.27	0.2	0.23	0.21	0.11	0.53	1.2	0.95	0.51	0.43	0.88
ncbi_101753202	CIPK32	19.12	15.56	19.97	33.3	44.98	38.03	44.26	30.84	28.1	27.6	27.02	27.76
ncbi_101753203	WRKY55	1.38	1.38	1.23	2.99	5.32	3.69	2.95	3.27	3.03	2.52	3.22	2.48
ncbi_101753204	BAT1	3.68	3.76	3.57	2.71	5.19	4.14	11.89	8.9	9.62	7.25	7.88	7.87
ncbi_101753207	RPS17	14.23	13.14	17.63	8.09	17.83	12.1	7.75	23.31	21.24	37.77	43.46	54.14
ncbi_101753208	--	0.72	0.94	1.52	0.55	0.76	0.22	3.45	2.68	3.97	8.75	9.73	9.25
ncbi_101753211	GSH1-1	76.04	52.43	45.63	95.69	68.24	63.8	162.98	98.92	99.5	134.15	120.39	96.53
ncbi_101753214	BC10	3.11	2.97	6.54	3.11	3.35	2.64	7.26	7.46	8.39	4.67	3.77	4.71
ncbi_101753216	--	0.07	0.25	0.93	0.63	0.61	1.15	1.52	1.12	1.6	1.12	0.47	1.5
ncbi_101753218	--	1.27	0.35	0.27	0.74	0.41	0.25	0.28	0.17	0.26	0.04	0.23	0.16
ncbi_101753226	ABCG3	0.34	0.71	0.58	0.17	0.4	0.26	0.59	1.14	1.86	0.82	0.94	0.97
ncbi_101753227	COG2	8.34	7.13	10.36	8.04	13.94	13.56	12.01	9.84	10.67	9.69	7.58	9.07
ncbi_101753228	--	1.09	1.44	1.46	3.74	5.44	3.36	3.01	3.29	2.19	0.81	0.83	0.49
ncbi_101753229	PTAC2	4.23	5.01	5.79	3.18	5.23	4.3	5.83	9.09	8.41	10.95	13.12	12.74
ncbi_101753232	NHO1	116.31	104.02	89.68	221.56	179.38	179.36	66.42	41.5	40.85	43.44	59.08	40.67
ncbi_101753235	DRP1C	25.9	21.31	26.46	39.18	41.75	38.7	18.99	22.43	21.21	18.97	13.84	19.1
ncbi_101753240	HIPP05	140.82	150.92	143.35	147.71	152.17	131.07	210.73	167.49	209.69	114.28	149.67	174.73
ncbi_101753242	TI11D	0.55	1.26	6.1	0.68	1.43	0.89	0.39	1.32	2.03	0.35	0.44	0.62
ncbi_101753247	--	2.01	2.58	4.24	3.34	4.71	2.8	7.72	6.46	6.29	4.72	5.35	7.14
ncbi_101753249	At2g41040	85.62	68.32	86.49	38.05	54.35	46.21	128.36	116.99	101.75	254.44	218.56	200.2
ncbi_101753250	PCMP-H42	1.23	1.61	2.34	1.2	1.89	1.45	1.77	2.07	1.78	2.84	2.55	2.04
ncbi_101753252	PLP7	1.44	0.37	1.11	1.73	1.74	2.71	7.96	1.58	1.24	2.48	2.92	1.48
ncbi_101753254	SDS	2.96	4.01	10.42	3.09	2.86	2.27	0.51	0.97	1.38	0.36	0.44	0.42
ncbi_101753255	--	0.42	0.26	0.63	0.55	0.74	0.5	0.97	1.16	0.91	1.03	1.28	1.3
ncbi_101753258	TRAPPC2	4.92	3.53	4.92	3.43	3.8	3.75	7.84	6.74	5.74	6.98	5.39	7.95
ncbi_101753259	At5g01110	3.18	3.42	3.5	2.5	5.39	4.47	3.18	3.71	2.55	2.95	2.85	2.19
ncbi_101753261	THO7A	5.86	4.81	8.48	3.21	4.33	3.87	15.5	12.64	12.71	12.72	11.7	14.32
ncbi_101753264	At5g39865	2.27	2.76	4.48	0.66	1.4	1.33	15.11	13.9	16.6	22.17	20.24	21.98
ncbi_101753265	RTNLB1	1.2	0.9	1.42	0.65	1.19	1.61	1.15	1.94	2.48	1.05	1.22	2.66
ncbi_101753267	HKT8	0	0	0.02	0.08	0	0	0.07	0.19	1.22	0.1	0.03	0.13
ncbi_101753270	syc1174_c	3.42	3.02	3.37	1.81	2.27	2.38	1.37	2.84	2.56	8.47	8.91	7.39
ncbi_101753271	LRK10L-2.5	11.17	12.85	9.56	5.7	6.89	10.53	10.39	9.2	10.51	1	2.32	1.29
ncbi_101753273	GA3ox2-2	0.23	0.07	0.53	0.11	0.61	0.2	2.4	1.71	2.64	3.37	4.42	1.87
ncbi_101753275	SSRP1	42.64	41.1	54.06	63.96	64.42	68.73	47.63	43.72	51.72	50.74	49.08	47.82
ncbi_101753277	--	11.51	13.56	19.41	13.89	17.47	16.57	14.76	14.08	17.41	16.58	14.11	13.13
ncbi_101753279	SGT1	252.46	218.52	209.75	289.89	232.8	239.27	256.35	295.67	267.31	213.49	219.38	214.73
ncbi_101753280	RABA1F	331.91	539.01	441.69	165.98	126.33	284.92	92.67	154.42	187.21	34.72	68.35	71.93
ncbi_101753281	CDA1	2.76	2.56	6.66	4.77	3.88	3.4	10.63	7.41	9.07	12.5	11.15	10.59
ncbi_101753282	AMC5	9.07	9.2	14.02	11.58	15.29	13.93	20.47	17.85	20.67	17.95	16.47	18.25
ncbi_101753283	GILT	0.21	0.07	0.35	0.11	0	0.36	4.92	2.02	0.35	2.72	1.26	2.39
ncbi_101753284	--	1.78	1.78	2.97	0.9	1.22	1.8	3	2.65	3.01	4.07	4.21	4.13
ncbi_101753285	PEX7	6.95	5.52	7.53	8.2	6.95	7.26	15.51	8.56	9.43	16.8	13.39	16.39
ncbi_101753286	ADCK1	12.65	16.7	19.58	11.63	14.75	16.24	24.97	20.78	26.92	33.11	31.19	36.16
ncbi_101753287	GAPCP1	10.76	11.62	10.86	15.11	10.81	11.79	26.45	31.06	26.95	19.69	18.82	17.11
ncbi_101753288	Os01g0954000	389.1	309.39	178.25	323.5	176.83	242.01	402.38	323.59	279.36	247.96	251.96	254.59
ncbi_101753289	SNRPD2	14.46	13.3	21.55	8.9	13.34	10.49	45.26	42.45	39.41	40.77	32.3	33.11
ncbi_101753291	--	4.24	3.96	5.62	4.01	5.76	4.74	9.69	9.66	8.49	12.84	11.01	8.13
ncbi_101753293	DCTPP1	0.14	0.88	0.66	0.48	0.45	0.75	1.23	1.07	1.05	0.79	0.66	0.87
ncbi_101753295	AMT3-3	1.39	1.65	1.62	1.2	1.62	1.69	2.47	2.07	1.9	1.97	2.64	2.03
ncbi_101753299	ZCYB	52.39	54.26	64.08	43.78	49.82	45.83	141.19	142.56	154.15	203.56	187.29	201.63
ncbi_101753300	--	1.52	5.05	9.59	8.65	9.57	7.67	14.41	12.42	15.02	19.76	14.74	21.62
ncbi_101753301	--	2.42	3.31	7.67	2.09	3.63	2.56	8.8	11.29	16.43	2.38	2.37	2.38
ncbi_101753302	hsaD	65.21	59.44	56.48	31.09	48.57	45.11	80.63	69.79	74.95	213.81	168.25	160.47
ncbi_101753305	RP-P0	35.18	36.28	43.52	41.27	42.78	38	102.92	121.51	101.95	79.56	83.27	101.25
ncbi_101753307	elav	40.85	30.97	56.21	13.62	18.42	18.97	13.5	17.26	21.83	40.95	43.93	62.71
ncbi_101753309	FKBP16-3	0.58	2.82	2.71	1.72	2.27	2.07	1.84	3.87	3.66	9.91	7.8	6.15
ncbi_101753318	EOL1	3.48	3.94	4.92	4.21	6.02	4.56	5.07	6.45	7.1	7.79	5.96	7.51
ncbi_101753323	FES1	1.06	0.67	1.22	0.15	0.24	0.19	2.58	2.64	2.12	2.69	2.42	1.83
ncbi_101753324	KU70	2.17	1.71	3.11	1.01	1.57	2.28	4.14	3.53	3.19	3.51	3.37	2.73
ncbi_101753325	HIPP23	2.46	6.44	8.44	3.88	6.38	6.01	1.84	6.77	10.83	0.58	1.03	1.08
ncbi_101753326	--	0.54	0.9	3.98	0	0.1	0.1	0.07	0.52	0.82	0.67	0.16	0.12
ncbi_101753327	VIT2	1.06	2.77	1.37	3.59	3.24	5.34	19.77	62.12	140.13	3.44	4.73	30.09
ncbi_101753328	RPP25	21.45	21.39	24.16	39.07	34.45	40.44	14.7	17.25	15.03	17.97	18.27	18.27
ncbi_101753329	BADH1	31.52	34.03	63.38	22.86	24.36	25.39	117.54	76.13	87.61	45.18	60.94	44.71
ncbi_101753330	--	6.18	5.83	5.33	6.16	5.78	8.04	17.69	13.31	14.02	12.75	11.76	14.9
ncbi_101753332	endou-a	54.03	56.86	90.01	48.23	53.2	49.45	69.2	65.59	71.47	81.82	83.17	90.43
ncbi_101753333	EBP2	4.88	4.55	6.67	8.67	10.3	8.1	16.39	16.7	12.55	15.63	14.61	14.64
ncbi_101753334	At3g52120	34.39	36.87	40.95	36.55	38.91	38.12	43.63	36.69	34.75	39.55	39.59	37.84
ncbi_101753336	Os07g0608400	2.38	2.78	3.06	3.08	4.16	4.04	7.41	4.69	4.54	6.38	4.43	5.8
ncbi_101753338	At2g23540	0.73	0.08	0.13	0.33	0.03	0.19	0.29	0.38	0.27	1.09	0.5	1.25
ncbi_101753349	--	3.51	1.84	1.95	5.8	7.16	4.93	8.75	5.72	4.39	6.33	6.55	6.62
ncbi_101753351	--	0.53	0.33	0.52	0.45	0.93	0.5	0.92	0.82	1.13	1.59	2.38	1.38
ncbi_101753353	--	0.37	0.46	0.58	0.52	0.53	1.29	1.37	0.79	0.98	0.65	0.58	1.44
ncbi_101753354	RGA5	0	0	0.01	0	0.01	0.01	0	0	0	0.7	5.27	0
ncbi_101753355	UCH3	5.39	4.96	7.07	2.63	3.54	4.19	5.32	6.14	7.58	6.45	6.35	7.63
ncbi_101753356	--	1.56	1.39	2.76	0.81	1.04	0.79	4.96	5.24	4.42	8.64	7.47	7.1
ncbi_101753358	AIP2	43.34	36.93	51.62	43.88	55.23	51.91	57.61	61.66	56.14	51.89	49.65	58.94
ncbi_101753361	COX19	1.69	2.03	2.94	1.98	1.68	1.98	5.72	9.68	6.75	6.01	5.82	6.82
ncbi_101753365	--	3.5	4.1	4.61	2.88	3.49	3.64	6.07	9.18	6.76	7.25	6.58	5.71
ncbi_101753366	--	0.3	0.37	0.36	0.35	0	0.2	1.17	0.74	0.89	0.55	0.69	0.53
ncbi_101753370	PVIP	53.91	54.07	53.37	62.26	60.83	65.93	30.87	35.37	42.11	23.82	30.38	29.73
ncbi_101753371	CYP22	3.89	4.19	7.44	3.33	3.5	3.27	11.07	11.31	10.58	9.85	7.54	6.87
ncbi_101753373	WRKY21	1.39	1.43	1.49	1.94	1.35	1.99	5.14	7.73	8.71	3.56	3.77	2.22
ncbi_101753374	AT8	8.1	10.6	19.9	13.22	17.79	13.87	19.14	17.75	18.02	2.83	3.72	3.31
ncbi_101753377	--	0.93	0.12	2.89	0.29	0.07	0.08	0.16	0.03	0	0.21	0	0.03
ncbi_101753379	--	6.13	6.3	9.05	15.59	17.2	16.48	21.42	13.18	9.39	20.5	18.66	20.19
ncbi_101753381	RMA1	9.65	6.77	7.04	10.72	10.48	9.79	6.72	6.98	5.68	6.93	7.68	6.8
ncbi_101753383	--	6.46	3.17	1.23	7.56	2.71	3.05	3.91	1.98	1.34	0.99	1.55	2.19
ncbi_101753384	--	0.74	0.84	0.86	0.94	1.26	0.64	0.54	1.36	1.09	1.86	2.43	3.02
ncbi_101753385	SRF6	0.45	1.18	0.8	0.49	0.99	0.45	0.67	0.69	1.28	0.44	0.46	0.29
ncbi_101753386	acyP	5.06	6.68	8	5.8	6.04	5.38	30.61	20.27	17.67	19.9	21.19	20.17
ncbi_101753388	SAC3C	5.41	6.82	8.81	5.6	6.32	5.97	12.91	10.93	10.67	8.75	9.79	11.81
ncbi_101753390	ATAD5	1.6	1.62	2.45	1.22	1.72	1.24	1.98	2.03	2.44	1.88	2.28	1.74
ncbi_101753391	CML29	4.66	6.53	5.38	3.83	4.26	6	4.29	3.87	4.17	6.14	6.59	5.87
ncbi_101753392	ATL47	2.31	1.56	1.91	4.41	6.69	4.21	0.18	0.44	0.33	0.24	0	0.04
ncbi_101753394	PIGF	4.53	4.65	7.69	3.2	4.43	4.08	14.44	14.74	11.1	10.55	10.47	12.18
ncbi_101753403	--	41.26	46.13	49.46	20.94	26.85	28.45	78.69	91.09	118.28	118.51	113.36	129.21
ncbi_101753404	BFR2	7.02	6.67	9.1	6.8	6.6	7.39	16.67	17.76	16.2	16.02	14.03	14.85
ncbi_101753406	--	1.38	0.87	9.78	0.16	0.44	0.21	0.38	4.46	4.93	1.51	0.22	2.11
ncbi_101753410	ALDP	0.2	0.32	0.59	0	0.08	0.17	1.48	2.38	1.95	1.44	0.91	1.52
ncbi_101753414	--	20.81	16.49	20.24	30.14	32.43	28.74	31.41	27.72	28.22	30.69	33.86	33.04
ncbi_101753416	PDIL1-4	48.73	47.18	60.27	38.53	43.05	40.29	107.79	91.02	94.16	59.31	65.31	56.4
ncbi_101753417	ACT7	202.13	267.03	171.03	143.07	172.89	273.55	138.85	162.87	171.47	82.86	100.37	97.21
ncbi_101753418	--	0.26	0.34	1.96	1	0.8	1.44	0.07	0.11	0.12	1.05	2.16	0.58
ncbi_101753419	At5g47430	73.02	57.94	66.3	65.83	61.96	67.47	72.17	72.86	62.61	53.98	41.43	61.46
ncbi_101753421	--	13.11	15.79	13.37	9.41	12.93	12.97	4.39	8.3	9.58	15.85	10.5	25.46
ncbi_101753422	--	54.23	27.32	31.58	76.32	97.66	77.68	11.11	20.94	17.09	10.12	21.61	18.86
ncbi_101753423	CPR1	0.46	0.18	0.33	0.13	0.7	0.54	0.81	0.74	0.84	0.97	1.13	0.85
ncbi_101753427	--	3.57	3.08	3.39	3.19	4.38	3.95	7.03	7.92	6.93	9.39	9.84	7.01
ncbi_101753430	--	7.13	7.21	17.85	27.47	53.16	41.43	9.49	5	5.49	7.2	19.84	9.13
ncbi_101753431	At3g03070	33.22	33.36	43.01	23.39	33.7	29.94	69.49	58.17	57.72	54.55	50.27	59.07
ncbi_101753432	KUA1	5.07	2.92	3.11	4.56	4.85	4.69	6.18	6.73	8.13	4.81	6.5	5.44
ncbi_101753433	ARP1	15.6	9.46	14.83	20.21	20.01	24.53	9.23	2.03	1.38	5.78	6.34	3.59
ncbi_101753434	--	0.52	0.56	1.06	0.49	0.5	0.45	2.52	2.18	1.11	2.38	2.27	1.47
ncbi_101753435	ankrd13c	11.14	10.63	13.09	13.78	15.74	14.28	16.94	15.04	13.17	15.31	17.38	16.62
ncbi_101753441	APX4	58.97	69.82	98.9	50.59	64.3	58.75	99.73	84.25	81.3	117.88	119.38	123.13
ncbi_101753445	DIEXF	2.46	2.55	3.77	1.43	1.45	1.91	5.83	9.05	6.16	8.2	8.01	6.49
ncbi_101753449	metl	1.78	1.39	1.89	1.13	1.81	0.87	5.34	4.59	4.72	3.26	3.98	3.17
ncbi_101753451	At3g02645	13.04	16.76	17.87	12.14	10.41	16.01	28.04	34.52	39.83	19.52	17.78	22.72
ncbi_101753454	Os04g0338000	26.33	8.98	3.21	43.17	22.17	26.35	1.18	4.11	2.35	1.14	2.66	1.37
ncbi_101753457	BRM	40.47	46.89	41.18	36.4	42.12	40.55	21.51	22.22	29.8	30.28	29.88	24.4
ncbi_101753458	MPT1	2.59	1.96	3.24	2.29	2.31	2.03	7.87	7.49	6.5	20.92	16.2	11.42
ncbi_101753459	At5g41890	0.22	0.27	0.44	0.37	0.99	1.3	0.28	0.33	0.55	0.03	0.11	0.28
ncbi_101753460	--	14.92	12.53	18.39	9.28	11.78	9.79	22.01	19.44	21.44	31.72	34.96	32.87
ncbi_101753461	GINS2	2.32	3.35	2.45	2.19	2.71	2.7	10.69	8.16	7.67	13.23	11.57	9.55
ncbi_101753469	--	21.91	22.84	24.52	15.17	22.29	18.63	26.59	39.31	37.92	63.89	50.87	54.03
ncbi_101753472	--	0.81	0.82	1.65	0.33	0.38	0.66	0.74	0.18	0.51	1.61	4.33	0.41
ncbi_101753473	PAO5	83.49	91.46	69.78	119.44	134.94	119.7	32.55	33.23	30.4	9.62	10.81	15.01
ncbi_101753475	PP2B2	14.07	18.11	15.89	17.94	23.24	23.73	32.09	33.45	39.7	19.28	14.85	22.6
ncbi_101753476	mucD	18.39	14.35	15.87	16.69	19.57	19.45	20.1	18.04	21.23	27.48	24.87	21.5
ncbi_101753477	ZAR1	0.2	0.46	0.58	0.22	0.34	0.46	1.08	0.82	1.01	0.54	0.59	0.51
ncbi_101753481	EIX1	0.61	0.79	0.46	0.5	0.76	0.6	0.14	0.58	0.62	0.43	1.38	0.53
ncbi_101753482	ERD2A	15.08	15.71	15.06	15.94	17.37	12.48	21.75	19.75	17.94	20.91	17.73	17.05
ncbi_101753485	BX6	2.77	4.1	7.45	4.24	5.77	3.99	30.91	9.54	6.91	16.29	19.66	12.82
ncbi_101753489	SWEET13	80.29	96.43	98.57	107.77	127.04	123.1	125.55	211.65	183.02	332.19	304.15	324.35
ncbi_101753490	CCX1	4.04	1.61	2.67	4.28	3.26	3.4	8.98	4.2	2.57	5.1	3.36	7.11
ncbi_101753493	GATA18	27.27	29.41	27.54	18.52	26.75	25.2	25.24	22.83	23.71	40.74	38.44	41.41
ncbi_101753495	At5g05600	39.74	24.92	36.78	44.02	44.86	18.5	49.19	57.79	45.58	185.87	120.71	88.07
ncbi_101753498	RGA5	7.49	8	8.29	5.47	11.73	8.72	3.54	6.46	6.76	12.67	4.09	11.8
ncbi_101753499	At5g43820	2.6	2.72	3.02	1.38	2.16	2.39	1.48	2.23	3.24	3.12	2.77	2.13
ncbi_101753500	DTX16	9.74	9.32	9.19	7.26	8.97	10	7.53	8.91	10.51	16.48	19.43	15.94
ncbi_101753502	At2g45590	0.64	0.41	0.55	0.56	0.89	0.91	2.66	1.58	2.28	2.98	3.13	2.12
ncbi_101753503	ATL60	158.81	200.9	240.57	95.78	221.19	270.16	355.09	278.4	244.84	126.37	234.53	223.51
ncbi_101753504	TIF3B1	38.29	37.51	45.23	43.58	42.7	43.55	74.33	73.85	73.31	76.7	68.27	63.07
ncbi_101753505	1MMP	0.51	0.9	0.64	0.67	0.89	0.49	1.36	1.71	1.3	1.18	2.49	1.85
ncbi_101753506	EMB975	3.75	3.15	4.01	2.71	4.12	2.69	3.72	5.07	5.49	9.03	10.39	9.25
ncbi_101753507	noc3l	2.32	2.3	3.57	1.92	1.94	1.72	10.31	11.33	9.05	8.15	7.93	7.4
ncbi_101753508	--	9.16	9.87	12.78	9.58	13.27	12.02	14.68	12.87	13.72	19	17.66	15.71
ncbi_101753509	HAK8	0.81	2.02	0.98	0.56	1.14	0.86	0.43	1.77	2.58	2.02	1.12	1.46
ncbi_101753511	GEP	18.46	18.25	20.68	15.78	19.21	19.1	17.56	18.87	21.75	19.21	18.11	18.96
ncbi_101753513	SPP	144.36	129.52	115.1	110.85	128.97	123.44	64.79	77.49	78.17	102.09	98.18	90.26
ncbi_101753515	LIC	1.14	1.2	2.3	0.87	1.3	1.12	2.51	3.69	3.45	4.02	4.34	3.61
ncbi_101753516	--	16.51	14.69	15.74	9.72	9.87	9.58	37.12	42.39	45.28	69.6	65.56	86.1
ncbi_101753519	U2AF65B	39.95	36.65	38.06	31.64	40.85	38.99	22.77	24.01	30.18	35	32.03	29.58
ncbi_101753521	PAB	22.46	23.41	27.95	11.53	16.89	12.02	25.02	31.02	35.22	46.16	43.56	45.88
ncbi_101753523	--	0.66	0.83	1.47	0.69	1.64	0.6	0.04	0.19	0.07	0.11	0.03	0.33
ncbi_101753532	CLPP3	29.8	29.19	34.36	15.03	23.21	16.63	24.68	31.19	35.94	52.64	55.45	47.83
ncbi_101753533	BPA1	1.22	1.45	1.52	0.81	1.6	0.79	1.87	0.66	2.01	2.67	3.41	2.48
ncbi_101753534	QKY	0.42	0.82	0.57	0.45	0.57	0.57	0.91	1.05	1.07	1.33	1.35	1.13
ncbi_101753535	AAA1	3.62	3.26	4.39	6	8.28	7.68	6.23	5.46	6.67	5.74	7.73	5.48
ncbi_101753536	--	1.22	0.71	3.48	2.08	2.18	1.22	13.18	1.72	1.04	8.64	10.92	4.71
ncbi_101753537	--	6.07	5.72	6.49	5.93	7.35	6.07	9.15	9.53	8.87	11.79	11.51	10.44
ncbi_101753538	UVR8	0.8	0.61	0.94	0.36	0.7	0.59	4.03	2.43	1.26	4.25	3.7	1.98
ncbi_101753539	At3g55800	196.8	243.04	202.61	197.67	272.69	227.97	151.68	214.66	260.39	380.77	302.82	396.42
ncbi_101753540	UGT73E1	2.61	1.77	1.26	1.96	1.44	1.99	1.28	2.57	3.66	4.58	5.1	8.29
ncbi_101753541	SWI3B	5.47	5.36	6.87	4.72	7.23	6.12	13.56	11.43	10.62	12.12	11.3	10.14
ncbi_101753542	At3g02290	3.34	3.26	6.27	3.14	5.32	3.2	8.81	9.76	9.02	4.82	4.97	6.59
ncbi_101753543	PAGR	0.38	0.62	0.91	0.22	0.63	0.59	4.02	3.43	2.8	2.49	1.81	2.96
ncbi_101753545	At2g17033	1.12	1.07	0.95	0.82	1.6	1.26	1.28	3.28	3.49	6.25	4.14	7.07
ncbi_101753549		53.96	46.68	47.93	75.96	90.82	61.31	62.86	82.99	76.42	8.37	23.61	47.94
ncbi_101753550	SKIP35	5.96	6.65	8.54	5.36	8.99	7.48	12.33	11.61	12.69	12.37	12.43	12.51
ncbi_101753551	--	0.63	0.39	0.72	0.44	0.56	0.62	1.01	1.06	1.25	0.69	1.23	0.68
ncbi_101753552	At3g58210	3.49	4.58	5.03	2.53	3.63	3.47	4.73	5.27	5.75	8.13	6.85	7.16
ncbi_101753554	--	0	0	0.12	0.13	0	0	2.16	0.07	0	0.9	0.73	0.16
ncbi_101753556	DREB1E	6.08	8.22	7.22	4.08	3.7	9.86	2.89	11.55	8.25	1.83	1.42	0.9
ncbi_101753557	HAK12	6.49	3.69	3.71	13.56	10.25	6.58	12.31	7.11	4.5	4.19	4.7	3
ncbi_101753558	Prelid3b	18.39	16.92	16.66	23.76	28	28.55	16.38	18.23	15.42	7.9	10.43	11.94
ncbi_101753559	MEKK1	14.67	20.98	14.43	6.03	7.79	12.17	3.62	7.44	7.99	2.29	3.02	3.61
ncbi_101753560	I-2	26.53	25.68	30.13	24.18	32.03	28.62	24.59	22.61	19.78	23.29	22.3	22.03
ncbi_101753561	SAC2	31.96	29.26	43.48	41.15	40.4	40.36	40.46	36.59	37.85	48.17	46.13	42.62
ncbi_101753564	PCRK1	25.47	33.52	28.59	13.47	17.21	17.35	19.25	27.2	25.38	22.1	22	23.05
ncbi_101753565	--	22.79	25.64	31.53	12.17	14.44	15.98	51.09	40.32	45.13	97.29	84.11	85.32
ncbi_101753566	ahsa	142.99	123.1	48.38	122.21	29.11	48.89	70.85	50.11	43.89	47.65	47.2	38.49
ncbi_101753568	ROMT-15	0.56	0.42	1.22	0.92	0.65	0.92	0.75	1.66	1.19	1.2	0.61	0.79
ncbi_101753570	OsI_29993	7.19	11.28	8.52	8.27	8.88	8.13	2.46	2.47	3.45	0.84	0.91	0.46
ncbi_101753575	CXE15	0.32	0.42	0.44	0.49	1.91	1.66	1.36	1.05	1.05	1.02	2	1.85
ncbi_101753578	CYP76B6	22.97	35.68	93.62	7.76	6.59	6.4	45.42	100.17	61.37	12.72	19.9	20.6
ncbi_101753579	At1g06620	0.96	1.83	1.71	2.21	2.86	2.13	7.11	3.31	3.06	5.74	5.18	4.36
ncbi_101753580	--	33.77	38.6	34.45	36.77	44.87	41.53	24.12	23.32	24.26	13.27	16.56	13.94
ncbi_101753582	--	3.01	3.31	6.57	2.53	3.15	2.92	31.93	13.08	8.54	20.85	14.62	14.62
ncbi_101753583	FLXL4	5.06	6.47	8.01	5.22	7.47	6.65	11.86	10.43	10.71	12.61	11.02	11.72
ncbi_101753584	R40C1	4.72	2.38	3.58	2.55	3.82	2.95	4.93	4.6	4.9	5.72	4.34	5.57
ncbi_101753585	RPS16-2	5.09	3.93	7.51	3.22	5.14	4.18	13.1	12.15	8.91	9.46	8.78	10.39
ncbi_101753586	SNRNP35	2.97	2.87	4.29	1.94	2.79	2.31	7.87	6.64	7.26	8.86	7.52	8.21
ncbi_101753587	PPCK1	1.39	0.1	0.75	0.26	0.26	0.19	36.2	24.84	9.39	24.56	17.95	15.4
ncbi_101753588	SYP81	4.24	4.19	4.9	4.35	6.32	4.1	8.03	6.77	5.9	6.19	5.18	6.03
ncbi_101753590	At4g17616	0.44	0.38	0.69	0.19	0.56	0.5	1.23	2.03	1.35	3.19	2.49	2.36
ncbi_101753591	At1g56130	43.04	55.33	45.81	91.26	111.12	109.64	19.46	20.09	21.54	12.4	18.67	12.12
ncbi_101753592	VIII-2	18.13	19.54	22.53	19.57	24.18	25.68	14.59	16.11	19.62	27.38	29.1	23.73
ncbi_101753593	ATXR2	0.58	0.29	0.87	0.2	0.57	0.5	2.23	2.56	2.84	1.92	1.77	1.44
ncbi_101753595	Os05g0155601	90.53	68.34	67.81	129.71	119.02	109.93	49.94	53.31	53.65	53.58	62.47	61.53
ncbi_101753596	Os12g0192500	0.58	0.66	1.07	1.16	1.58	1.73	2.76	2.2	2.75	2.64	2.54	1.48
ncbi_101753597	--	1.83	3.19	3.31	0.72	1.33	0.87	3.05	6.78	11.29	1.65	2.16	1.93
ncbi_101753598	--	488.42	703.22	551.44	311.54	431.5	495.99	137.43	311.26	337.2	25.3	54.2	85.02
ncbi_101753599	HULK3	5.97	6.57	8.87	3.76	4.46	3.82	7.29	9.22	10.66	15.45	14.97	10.81
ncbi_101753600	--	15.31	12.29	14.57	3.24	5.39	4.18	8.42	16.79	23.08	28.28	23.72	29.82
ncbi_101753601	ATPK2	19.44	19.8	29.27	21.59	29.46	26.65	21.46	29.6	35.81	28.22	25.99	24.61
ncbi_101753602	--	12.09	7.47	14.86	8.63	9.46	9.88	36.79	19.54	18.27	26.78	26.64	21.29
ncbi_101753611	--	0.39	0.22	0.63	0.28	0.46	0.46	1.38	1.29	1.04	1.6	1.71	1.41
ncbi_101753612	RPL17	32.23	33.5	54.13	42.02	46.56	40.35	84.5	93.13	78.51	63.17	61.51	72.12
ncbi_101753615	RPS17	1.11	0.45	1.16	0.96	0.78	0.97	9.46	7.63	1.88	6.74	6.09	5.3
ncbi_101753617	At2g19130	3.92	12.43	9.29	2.03	5.82	5.37	3.89	5.67	6.58	0.88	0.88	1.28
ncbi_101753618	AG118	16.21	12.96	15.49	40.87	42.47	43.49	60.7	33.77	29.62	38.89	33.59	32.42
ncbi_101753620	CML18	80.88	98.21	107.17	53.66	68.67	78.82	81.71	84.28	73.21	42.6	72.83	68.24
ncbi_101753623	SPAC167.05	1.98	3.05	1.7	2.38	1.47	1.78	19.6	24.05	27.66	8.85	6.7	4.84
ncbi_101753624	At2g29170	70.47	64.85	94.29	24.22	33.74	30.48	91.98	87.55	88.97	244.51	256.29	222.19
ncbi_101753625	--	42.07	37.86	48.65	29.13	35.6	32.62	63.47	64.57	69.23	68.74	65.24	75.01
ncbi_101753630	IP5P10	14.98	17.66	23.81	15.43	16.9	15.31	9.74	11.79	15.53	11.29	12.98	15.31
ncbi_101753635	LARP1B	4.07	3.36	5.05	2.85	2.97	2.96	12.85	12.25	12.59	14.11	13.69	13.79
ncbi_101753636	RIN4	16.45	18.32	19.41	18.54	21.83	23.21	27.78	23.65	31.52	12.02	12	16.88
ncbi_101753637	RZ1A	23.95	17.23	26.87	23.31	40.81	34.78	40.09	29.84	21.01	18.35	15.24	20.62
ncbi_101753639	PCMP-H12	0.79	1.18	1.12	1.14	0.94	1.19	0.74	1.05	0.87	0.97	0.51	0.58
ncbi_101753640	RFC5	4.48	4.13	6.3	4.81	6.51	6.76	10.92	7.72	5.85	8.17	7.22	9.71
ncbi_101753641	STIPL1	4.05	4.25	6.47	5.34	6.91	5.04	6.53	7.95	7.53	9.77	9.82	8.99
ncbi_101753644	MADS14	56.78	47.67	57.85	63.82	81.98	104.29	50.94	50.87	52.25	57.91	56	80.09
ncbi_101753647	--	0.65	0.31	0.21	0.12	0.66	0.25	0.16	1.46	1.21	1.94	2.98	3.07
ncbi_101753650	TIM23-2	10.53	9.55	8.07	7.79	7.18	7.02	10	9.88	9.89	11.31	10.2	11.48
ncbi_101753652	RPL21E	30.99	29.2	35.76	38.95	44.96	40.78	120.95	146.02	119.25	77.65	67.52	109.99
ncbi_101753654	WAK5	8.86	7.41	5.08	5.43	9.47	7.95	9.41	13.09	10.5	4.98	4.86	10.77
ncbi_101753656	--	1.5	1.25	1.82	1.3	2.92	1.44	3.19	3.44	3.13	4.61	4.3	4.85
ncbi_101753657	CYSK	0.33	0.11	0.24	0.7	0.46	0.43	0.7	0.12	0.33	0.34	0.42	1.09
ncbi_101753658	rsmG	0.63	0.72	1.51	0.76	0.28	0.68	1.8	3.01	1.75	2.85	3.14	2.95
ncbi_101753659	PFP-ALPHA	35.52	38.47	79.67	18.98	30.5	22.88	14.09	21.98	28.77	30.28	27.44	34.3
ncbi_101753661	--	11.85	12.09	7.73	9.52	9.77	8.11	6.85	10	7.93	5.45	4.08	3.99
ncbi_101753662	elmoA	62.59	68.6	62.42	56.65	66.48	80.1	26.13	29.47	26.24	18.8	18.74	16.98
ncbi_101753664	PAP3	10.27	7.89	20.75	4.71	5.25	4.4	101.64	49.05	40.9	120.96	101.88	79.51
ncbi_101753665	MKK9	5.66	5.76	7.46	5.61	13.36	8.22	41.52	38.08	40.85	23.09	27.04	45.91
ncbi_101753666	NDB1	8.46	10.9	12	6.34	7.13	6.97	12.38	14.32	17.14	19.24	17.68	20.49
ncbi_101753668	PUP3	0.8	1.06	0.72	3.86	4.46	8.01	0.98	1.04	1.15	0.41	0.18	0.6
ncbi_101753669	ATL44	0.38	1.11	1.43	1.21	1.99	1.98	3.31	1.71	1.56	0.95	1.74	0.6
ncbi_101753676	NRPA1	4.8	4.15	6.83	3.12	3.66	4.03	11.21	13.74	12.93	10.56	10.06	7.92
ncbi_101753678	At4g18375	9.27	7.25	11.64	6.85	9.41	8.51	14.97	12.9	13.45	19.87	18.56	16.84
ncbi_101753687	PNSL3	24.9	27.25	19.58	10.66	14.6	12.92	5.44	19.96	23.85	34.24	38.54	55.53
ncbi_101753688	PDCL3	33.02	29.39	39.33	49.91	54.78	46.7	31.82	33.51	35.87	36.94	29.91	35.35
ncbi_101753690	SMU1	7.28	10.29	10.69	4.86	6.17	6.29	19.07	21.3	16.88	17.39	16.51	15.97
ncbi_101753691	ABCI1	3.03	3.27	4.03	3.41	3.53	3.62	9.57	9.01	8.29	7.71	8.69	7.4
ncbi_101753693	WRKY27	4.77	8.61	5.74	3.86	3.2	5.98	1.45	1.76	2.64	0.45	1.7	0.89
ncbi_101753694	U2AF35A	8.41	6.57	8.72	7.64	9.29	7.18	19.8	15.1	12.64	26.06	22.08	19.63
ncbi_101753697	At2g40280	0.73	1.02	1.9	0.85	0.75	0.84	2.15	2.68	2.36	2.92	2.87	2.18
ncbi_101753699	--	9.22	8.47	10.59	6.53	10.83	9.49	10.64	10.42	14.07	14.15	16.19	19.16
ncbi_101753703	SINAT4	6.31	8.22	9.09	8.12	11.72	10.64	8.32	8.32	9.56	9.44	9.75	9.51
ncbi_101753704	PER1	36.29	23.58	52.74	25.76	25.97	25.69	161.04	58.7	31.7	27.6	40.19	27.66
ncbi_101753705	NEDD1	6.62	7.74	9.45	5.87	8.75	7.83	11.06	11.4	11.16	9.66	9.4	11.28
ncbi_101753707	RRP45B	1.6	0.64	1.52	0.78	1.27	0.36	5.74	6.58	4.57	2.73	3.29	2.26
ncbi_101753708	PK1	0	0	0	0	0	0	0	0	0	0.81	1.46	0
ncbi_101753710	SHOC1	0.27	0.4	0.51	0.09	0.3	0.19	0.1	0.25	0.3	0.3	0.61	0.41
ncbi_101753711	--	4.07	3.94	4.9	4.66	5.39	5.29	9.23	9.36	10.41	11.07	8.52	9.95
ncbi_101753712	At4g09580	18.99	18.29	24.6	17.4	27.1	23.85	48.17	29.98	25.77	41.8	39.81	47.24
ncbi_101753713	Os12g0155000	1.96	0.67	0.87	3.61	1.58	3.54	1.21	0.55	0.47	0.51	0.29	0.32
ncbi_101753714	SIS8	15.09	14.54	12.93	15.91	18.66	18.36	16.18	15.91	16.21	20.11	19.71	19.04
ncbi_101753715	NAGK	20.59	18.1	17.18	19.23	21.76	20.8	14.28	15.92	17.24	15.68	15	18.76
ncbi_101753717	--	3.65	4.67	3.57	3.14	2.7	2.56	6.26	5.2	3.09	2.89	4.87	2.27
ncbi_101753722	SODCP	78.63	91.7	91.18	42.43	54.55	44.95	91	159.36	164.45	163.76	176.06	161.57
ncbi_101753728	WAP	9.02	8.99	9.48	7.13	10.5	10.81	6.04	10.44	13.36	15.04	16.11	15.74
ncbi_101753731	RZ1C	14.37	10.22	20.37	21.18	23.64	23.88	22.81	21.97	20.39	20.7	16.49	21.47
ncbi_101753732	UGT76B1	0.08	0.21	0.45	0.07	0	0.1	0.19	0.54	1.68	0.74	0.89	0.45
ncbi_101753734	CTDSPL2	4.96	5.63	6.02	5.64	6.47	6.15	10.13	10.37	9.64	8.06	8.12	9.67
ncbi_101753735	Os09g0325700	31.09	20.57	39.1	18.06	20.51	16.99	22.72	18.41	14.91	12.47	32.15	20.26
ncbi_101753737	S1FA2	159.5	98.92	89.9	120.17	116.76	80.67	95.81	90.32	68.45	73.2	71.97	58.65
ncbi_101753741	Os04g0590900	0.43	0.93	0.67	1.09	1.37	0.98	2.8	1.45	1.41	1.29	2.02	1.73
ncbi_101753742	RABA3	4.44	3.7	3.81	4.54	4.03	4.72	11.37	7.32	9.25	11.68	9.12	13.9
ncbi_101753743	CKB4	17.69	14.43	14	20.34	19.17	17.61	19.58	17.19	13.64	16.28	17.18	19
ncbi_101753744	STY17	0.54	0.58	0.78	0.95	0.8	0.93	4.48	2.22	0.89	1.53	0.69	0.77
ncbi_101753745	TUBA3	84.43	84.41	72.91	174.73	190.87	173.01	34.77	34.69	47.93	23.18	22.1	31.47
ncbi_101753747	--	4.09	4.04	5.55	5.25	7.87	6.22	14.02	9.8	7.31	8.39	7.26	10.1
ncbi_101753750	SSL10	0.79	0.42	0.89	0	0.25	0.04	0.25	1.13	1.52	1.05	1.54	1.97
ncbi_101753757	CBWD1	0.55	0.22	0.6	0.25	0.54	0.24	0.93	1.38	1.74	0.77	0.84	1.17
ncbi_101753758	--	3.31	2.65	1.64	1.37	1.83	3.29	1.13	1.7	0.83	0.47	0.84	0.8
ncbi_101753759	SIT2	2.24	1.95	5.15	1.49	1.88	1.52	6.42	4.41	3.53	8.01	10.54	6.8
ncbi_101753760	PUB44	36.96	47	23.31	32.16	27.47	38.54	4.77	11.12	14.29	0.82	1.69	1.54
ncbi_101753763	ATG4B	12.2	9.47	14.04	12.75	18.1	15.11	25.33	18.2	15.95	21.07	19.68	17.18
ncbi_101753764	PSRP6	9.37	10.41	10.56	3.65	9.01	5.82	12.23	24.06	22.44	43	36.69	51.32
ncbi_101753765	ABCD1	19.75	23.62	24.16	15.78	18.94	17.65	19.27	22.24	29.43	25.55	25.65	24.03
ncbi_101753766	CRK15	11.84	19.44	15.55	13.12	25.97	26.51	12	14.77	16.45	5.07	5.6	8.8
ncbi_101753768	crp-74	3.22	2.05	3.88	4.43	5.6	4.11	9.97	11.07	8.94	7.08	7.07	8.14
ncbi_101753771	MYB3R-2	4.49	6.71	6.5	11.27	8.78	8.66	6.12	5.71	3.67	8.04	7.33	4.68
ncbi_101753773	At1g34470	18.9	18.92	15.72	15.66	16.11	16.59	12.14	13.97	14.12	11.05	12.49	10.96
ncbi_101753774	CDKC-1	26.08	31.48	31.71	20.49	22.06	19.31	12.31	17.2	19.08	12.46	11.91	9.88
ncbi_101753776	SDH4	16.79	15.66	21.44	14.67	19.93	18.12	39.31	37.98	35.79	44.55	35.61	46.53
ncbi_101753781	--	8.26	9.43	11.82	6.77	8.48	8.8	9.98	9.29	11.28	10.89	10.01	9.82
ncbi_101753782	PAP1	24.21	20.57	33.47	6.99	7.89	7.35	161.86	116.71	111.82	149.64	117.18	111.91
ncbi_101753783	LYSA	12.41	12.6	16.34	9.35	10.72	10.92	29.07	34.08	30.7	27.85	26.8	26.84
ncbi_101753784	BHLH148	202	271.46	316.96	166.8	174.18	328.66	399.87	442.56	368.64	93.73	176.52	167.67
ncbi_101753787	SMH6	7.11	7.41	8.49	6.16	10.04	11.14	15.66	9.66	11.08	11.19	12.51	11.5
ncbi_101753789	XEG113	7.46	7.6	7.05	7.62	9.57	9.33	12.99	10	9.06	7.85	8.16	8.48
ncbi_101753793	PRMT10	0.64	0.42	1.12	0.53	0.83	0.75	2.82	4.57	3.48	2.09	1.76	1.77
ncbi_101753794	--	2.99	2.66	3.59	2.29	4.1	2.98	6.07	9.14	7.92	6.13	9.06	8.43
ncbi_101753795	AN	3.47	3.25	2.95	2.5	2.94	3.51	6.82	5.82	5.71	5.54	6.32	3.57
ncbi_101753796	DG1	18.65	18.49	20.56	12.21	15.41	14.31	8.36	16.79	17.56	26.62	27.49	28.72
ncbi_101753798	NPF3.1	0.92	0.82	2.04	0.42	0.41	0.62	9.34	9.03	10.41	11.53	9.35	8.13
ncbi_101753799	PER2	0.17	0.27	2.07	0	0.1	0	0.05	0.7	0.93	0.13	0	0.13
ncbi_101753800	RHC1A	8.06	5.65	6.1	8.78	14.89	13.28	10.87	8.23	8.84	8.74	9.56	10.23
ncbi_101753801	MEKK1	168.31	151.89	105.99	105.15	68.67	82.65	75.75	93.83	93.74	46.56	58.45	50.44
ncbi_101753802	ELP6	0.71	0.7	1.13	0.34	0.79	0.36	3.28	2.03	1.87	3.05	2.6	2.81
ncbi_101753804	--	5.04	4.29	6.18	6.74	10.52	7.03	10.38	8.64	8.48	9.8	10.46	13.14
ncbi_101753809	GINT1	1.01	0.61	1.55	0.77	0.61	0.57	1.85	1.65	1.79	1.89	1.86	1.85
ncbi_101753815	--	71.81	70.41	109.31	55.37	72.78	65.37	183.18	161.96	145.26	158.25	143.05	159.54
ncbi_101753816	--	1.73	2.08	1.99	1.55	2.36	2.62	4.4	4.19	3.96	2.82	2.53	2.7
ncbi_101753818	PHO1-1	4.4	3.33	3.12	2.58	3.07	4.72	1.79	2.48	2.57	4.26	2.84	4.22
ncbi_101753820	MAIL3	0.46	0.8	1.01	0.7	0.66	0.63	1.41	1.35	1.49	1.55	1.05	1.14
ncbi_101753824	ALDH2C4	4.91	3.27	2.34	9.57	8.43	7.46	12.78	5.08	4.74	4.61	6.19	5.96
ncbi_101753825	BASS2	1754.84	1834.4	1684.26	841.11	1174.85	1100.34	1784.89	2515.66	3048.21	3271.91	3155.93	3526.4
ncbi_101753826	ABCB4	0.55	0.45	0.54	0.96	0.8	1.01	0.62	0.94	1.53	0.83	0.59	0.8
ncbi_101753827	mrm1	0.55	0.26	0.78	0.33	0.38	0.5	1.79	3.4	2.29	2.6	3.62	3.11
ncbi_101753829	CBR1	25.03	26.76	36.25	44.74	46.93	40.12	71.98	67.72	61.95	58.16	53.92	59.7
ncbi_101753830	rplQ	0.89	1.68	4.49	2.26	2.71	2.58	14.82	12.34	11.2	8.99	9.14	9.12
ncbi_101753831	--	6.24	6.89	8.85	3.78	7.71	5.25	23.6	23.06	26.46	17.5	14.57	20.7
ncbi_101753832	YKT61	28.46	25.22	24.77	16.8	22.36	18.71	34.07	39.31	36.91	38.17	38.07	43.5
ncbi_101753834	TSR2	9.57	9.1	10.25	8.64	10.7	10.04	31.86	29.65	26.15	24.45	22.64	22.67
ncbi_101753836	SFGH	30.74	30.47	41.52	17.13	23.39	22.49	56.87	70.75	63.05	77.33	69.89	62.86
ncbi_101753839	PRORP1	0.76	0.69	1.11	0.26	0.54	0.36	0.65	1.44	1.12	1.51	2.44	2.04
ncbi_101753840	SSG4	9.87	11.06	10.92	10.51	11.03	11.6	17.22	11.22	11.21	15.92	15.96	11.54
ncbi_101753845	PSKR	0.36	0.22	0.44	0.29	1.27	0.64	0.97	0.92	0.67	2.07	1.36	1.48
ncbi_101753846	abhd17c	0.25	0.54	0.69	0.07	0.37	0.17	1.75	1.82	2	0.62	1.54	0.33
ncbi_101753848	UGT85A24	4.3	4.54	4.65	6.73	7.56	9.42	18.42	9.81	10.01	15	13.85	12.45
ncbi_101753849	--	1.98	2.91	3.91	1.94	3.47	2.42	7.82	6.01	4.85	6.83	6.41	6.54
ncbi_101753850	PHO1-2	0.15	0.16	0.32	0.07	0.03	0.11	0.78	1.62	1.47	0.96	1.37	1.01
ncbi_101753851	OsI_29059	1.79	1.37	2.32	0.89	2.6	1.38	4.03	7.2	6.9	6.94	9.94	6.81
ncbi_101753852	ALY4	13.27	13.77	19.85	14.15	18.59	17.28	33.72	26.03	25.36	31.82	28.39	28.42
ncbi_101753854	2023-08-08	0.25	0.02	0.22	0.1	0.44	0.12	1.41	2.44	3.56	1.37	1.48	1.04
ncbi_101753857	MYB1	2.2	1.44	1.41	12.97	7.12	7.52	2.23	1.51	1.95	13.49	8.69	10.5
ncbi_101753867	Os04g0338000	3.27	1.11	0.13	6.6	1.94	3.38	0.4	3.1	0.79	0.18	0.25	0.32
ncbi_101753868	SPOUT1	0.63	0.65	1.14	0.37	0.47	0.8	3.44	3.35	2.65	3.16	3.26	2.68
ncbi_101753871	BRM	14.27	15.76	16.01	15.12	17.07	15.98	11.04	11.2	13.44	16.45	15.28	12.66
ncbi_101753872	PMI1	4.4	3.43	6.4	1.81	2.71	2.52	9.43	19.87	24.27	49.45	49.32	49.71
ncbi_101753873	zds	61.95	58.06	56.86	26.79	37.3	30.03	59.62	69.1	69.64	127.14	128.51	104.99
ncbi_101753874	BMY1	0.95	0.77	1.22	0.3	0.66	0.39	9.82	6.95	11	15.33	12.44	13.84
ncbi_101753878	--	0.23	0.41	0.81	0.13	0.22	0.22	0.79	1.1	1	0.43	0.26	0.96
ncbi_101753882	--	0.57	0.76	0.31	0.54	0.47	0.48	1.01	1.13	1.02	1.23	1.04	0.86
ncbi_101753885	--	0.43	0.46	0.65	0.08	0.25	0.26	0.56	0.44	0.8	0.07	0.12	0.27
ncbi_101753887	Os04g0671100	53.65	38.41	41.74	38.12	38.58	31.13	111.86	54.49	39.57	70.73	59.19	59.91
ncbi_101753888	--	2.34	2.67	3.21	1.28	2.31	2.22	9.69	6.55	7.78	8.18	7.91	7.65
ncbi_101753889	RGA4	7.76	10.08	8.6	8.41	10.24	11.51	19.45	17.37	21.14	15.35	17.91	10.98
ncbi_101753890	SPP2	3.25	3.63	2.82	3.35	4.23	4.24	3.74	2.45	2.83	1.11	1.36	1.6
ncbi_101753891	BZIP1-A	50.04	57.11	58.73	43.52	54.72	49.26	44.39	43.63	47.41	36.72	41.05	33.23
ncbi_101753894	SPA1	3.06	4.48	4.46	2.03	3.47	3.21	1.99	3.36	3.1	7.98	6.72	6.82
ncbi_101753895	ECI2	19.72	15.41	16.12	19.76	18.85	15.68	44.68	33.29	28.9	41.48	41.69	38.15
ncbi_101753899	lip	413	308.54	279.7	366.52	195.07	173.79	135.14	197.83	165.74	85.37	100.41	97.64
ncbi_101753900	EIX1	0.44	0.84	0.82	0.44	0.8	0.61	0.59	0.39	0.95	0.1	0.13	0.14
ncbi_101753902	MUS1	1.52	1.64	2.26	1.27	1.37	1.11	2.27	2.36	3.38	3.29	3.86	3.03
ncbi_101753903	SWEET13	89.81	118.83	109.8	115.69	149.39	125.87	175.62	269.46	230.02	333.8	293.31	351.61
ncbi_101753904	N6amt1	2.79	2.67	3.51	2.55	4.56	3.34	5.14	5.22	4.38	7.35	7.46	7.57
ncbi_101753905	At5g49610	0.39	0.15	0.71	0.63	1.05	0.55	1.11	0.77	1.13	1.01	1.18	0.99
ncbi_101753906	TRI1	20.15	21.89	20.88	21.56	26.16	23.8	18.69	23.33	21.13	24.74	21.16	19.92
ncbi_101753909	UPL7	7.47	7.07	8.11	7.83	10.54	10.1	6.6	5.47	7.33	8.29	7.41	6.67
ncbi_101753911	Os03g0617900	8.38	7.97	10.68	31.36	24.86	26.7	26.93	20.91	15.74	14.58	13.02	11.85
ncbi_101753913	TIC110	55.68	53.46	54.11	47.07	52.03	51.96	44.52	56.2	62.96	79.62	79.51	84.88
ncbi_101753914	PAM16L2	27.65	20.79	29.13	27.03	19.49	18.75	54.99	47.27	40.27	60.84	54.07	48.19
ncbi_101753916	2023-10-07	184.16	185.81	101.68	143.5	103.27	107.09	59.32	69.4	64.36	20.51	25.8	26.78
ncbi_101753919	EMB976	2.71	2.76	3.69	1.94	3.42	2.56	2.87	3.42	3.65	5.91	8.68	6.01
ncbi_101753920	--	10.78	11.88	14.41	4.83	7.8	9.98	17.19	18.1	21.55	12.18	14.14	11.33
ncbi_101753921	--	68.24	71.51	57.81	71.63	68.65	65.72	33.62	36.08	42.47	37.6	36.69	31.05
ncbi_101753922	--	24.48	28.92	33.75	16.6	19.87	17.79	69.42	59.98	51.81	114.57	103.11	100.97
ncbi_101753926	At4g20820	26.11	17.2	4.25	97.15	29.6	43.28	6.22	9.56	8.23	1.72	2.41	1.72
ncbi_101753927	HUB1	8.34	9.26	10.72	6.02	9.05	9.13	10.88	10.69	11.77	14.55	15.66	12.3
ncbi_101753928	TAF1	11.36	10.97	11.96	7.76	9.18	9.07	11.21	11.5	12.88	17.38	15.99	13.18
ncbi_101753930	RPT4B	2.3	1.06	2.8	2.86	4.49	3.6	7.84	7.33	6.28	7.38	6.62	6.77
ncbi_101753931	--	6.37	6.46	7.81	1.02	2.58	3	11.69	6.16	9.09	32.44	29.03	34.63
ncbi_101753933	APEM9	9.18	9.07	11.06	9.14	10.97	10.86	15.84	13.45	13.3	13.98	14.86	15.9
ncbi_101753934	--	3.12	2.17	4.32	0.48	0.72	1.32	2.53	3.98	5.36	15.73	14.84	12.91
ncbi_101753935	FLZ1	1.52	0.12	0.95	3.13	2.8	1.18	1.23	1.43	0.81	1.95	3.47	3.62
ncbi_101753936	SPL2	17.31	21.15	19.76	15.98	17.45	17.66	18.03	18.24	20.21	19.64	19.96	22.35
ncbi_101753938	NPGR2	32.24	33.87	29.97	30.4	41.13	38.01	18.74	18.33	18.68	10.29	9.91	8.48
ncbi_101753940	NAC086	0.23	0.46	0.27	0.21	0.42	0.12	0.54	0.39	0.65	0.24	0.28	0.18
ncbi_101753941	HOX10	7.09	8.34	9.7	6.2	8.79	7.12	13.93	16.22	18.21	15.01	14.28	15.26
ncbi_101753942	--	23.13	15.5	22.19	2.8	17.6	2.89	40.3	28.25	22.3	33.37	19.03	28.26
ncbi_101753950	At5g49610	0.49	0.42	0.81	1.2	1.69	1.52	1.97	1.66	1.53	1.54	1.81	1.03
ncbi_101753953	At3g47570	0.1	2.8	1.6	1.37	1.66	1.35	4.82	2.93	4.29	3.88	1.71	4.34
ncbi_101753954	CP2	13.23	14.13	19.44	8.51	10.23	10.13	25.51	22.44	22.73	24.41	22.97	22.06
ncbi_101753955	--	2.28	3.9	4.52	1.88	2.8	2.37	6.15	4.43	7.45	8.82	12.88	6.66
ncbi_101753956	Os01g0587000	66.27	69.2	88.35	50.66	61.14	54.09	123.25	115.38	110.24	128.8	117.73	125.25
ncbi_101753958	SBT5.6	0.29	0.73	0.28	0.45	0.36	0.24	2.45	0.97	2.51	2.23	4.17	1.62
ncbi_101753962	UGT73E1	0.71	1.1	0.48	0.09	0.07	0.07	0.8	0.94	1.29	4.9	4.86	3.56
ncbi_101753963	BZIP50	7.79	6.65	8.9	5.27	7.39	5.44	14.39	13.18	10.66	11.44	12.99	11.37
ncbi_101753964	tal	62.9	40.13	40.45	238.64	178.95	167.48	129.73	73.26	62.82	74	66.77	51.08
ncbi_101753967	IBI1	0.56	0.82	0.17	0.29	0.13	0.82	3.18	2.29	1.93	1.25	1.46	0.92
ncbi_101753969	AAPT1	12.67	15.38	15.21	9.13	13.89	12.14	16.67	18.98	20.52	20.87	19.3	25.59
ncbi_101753975	I-2	41.19	35.59	49.47	29.31	31.44	31.47	40.87	41.05	45.61	59.41	57.62	56.64
ncbi_101753977	--	1.9	2.6	3.17	2.13	2.36	1.93	7.7	9.08	6.87	8.07	7.88	6.79
ncbi_101753978	UDP-GALT1	7.25	6.55	11.58	11.8	13.99	11.96	43.09	24.37	14.32	27.11	23.9	23.66
ncbi_101753979	--	12.18	19.88	10.94	9.31	11.19	9.69	4.84	12.92	14.35	14.23	14.6	17.08
ncbi_101753980	TULP5	0.15	0.17	0.49	0.85	1.5	1.23	0.93	0.52	0.43	0.9	0.7	0.54
ncbi_101753981	--	5.06	3.24	5.31	5.68	4.25	2.66	7.72	7.5	5.5	4.46	4.96	4.83
ncbi_101753982	--	6.82	5.71	5.64	11.29	13.9	11.76	17.37	10.25	9.17	17.72	14.82	14.1
ncbi_101753986	--	38.93	41.2	47.88	27.28	34.13	30.55	60.14	59.86	57.15	65.95	56.2	54.8
ncbi_101753987	dnlz	4.5	3.35	4.24	3.97	5.94	5.92	12.46	9.44	7.78	16.31	14.73	11.6
ncbi_101753989	ROMT-17	3.4	3.92	4.24	8.64	8.37	6.03	6.53	3.91	4.7	2.29	2.74	2.31
ncbi_101753996	DLD	3.81	8.81	14.22	2.73	9.71	5.17	20.47	18.12	18.12	22.6	20.06	21.58
ncbi_101753998	AIRP2	6.03	5.41	5.67	7.28	9.87	8.23	10.07	7.57	8.67	11.3	11.35	10.28
ncbi_101754002	--	2.25	2.14	3.4	2.57	3.95	2.87	4.95	4.52	5.04	7.07	7.06	5.54
ncbi_101754003	VDE1	11.91	11.08	14.7	10.48	14.23	14.25	9.89	13.49	18.04	40.12	38.83	39.54
ncbi_101754005	B0464.9	9.7	8.09	13.85	12.46	12.81	12.97	20.45	17.71	18.1	18.6	20.01	16.67
ncbi_101754006	--	0	0.25	0.41	0.11	0.14	0.11	0.45	1.09	0.7	1.12	0.81	0.73
ncbi_101754009	--	6.34	4.29	9.04	7.58	8.85	7.93	12.29	10.53	9.46	10.54	11.24	11.19
ncbi_101754010	trappc2l	15.61	13.9	23.99	16.65	21.19	16.85	32.64	26.32	25.47	23.17	22.37	21.68
ncbi_101754011	FRS3	1.47	1.56	2.18	0.9	1.65	1.66	3.94	4.36	4.73	5.03	4.81	4.27
ncbi_101754012	--	0.32	0.78	0.68	0.42	0.42	0.25	1.02	2.24	2.53	0.85	0.95	0.87
ncbi_101754013	At1g16860	2.13	2.26	5.7	2.71	5.6	5.07	3.44	4.73	5.35	2.74	2.31	2.69
ncbi_101754015	--	0.98	1.9	2.04	1.45	1.73	1.53	5.36	6.16	5.06	8.83	5.29	5.71
ncbi_101754016	PEX22	12.75	9.07	13.85	12.18	17.22	14.39	15.63	17.31	16.06	14.05	15.76	17.49
ncbi_101754017	SK3	4.11	4.24	3.75	1.35	2.91	1.46	4.15	2.65	3.16	4.71	4.02	3.79
ncbi_101754018	SCPL42	2.55	2.95	3.42	1.69	2.22	2.92	3.4	3.95	5.12	3.48	3.46	3.67
ncbi_101754019	E2FA	4.6	4.18	5.22	12.82	19.32	16.73	3.25	2.27	1.85	3.02	3.34	3.37
ncbi_101754020	RGA3	4.35	4.28	6.81	5.48	11.5	8.5	9.6	10.09	9.01	14.45	12.58	12.33
ncbi_101754021	--	172.85	285.77	385.41	85.2	166.08	329.93	168.26	216.38	224.68	92.37	241.22	214.01
ncbi_101754025	Dagla	12.26	14.4	15.2	15.92	14.38	13.57	12.41	11.57	11.58	16.04	17.51	12.65
ncbi_101754029	WRKY63	20	25.3	18.97	12.92	10.36	13.58	33.42	41.55	35.29	4.07	24.85	4.83
ncbi_101754033	OsI_18044	23.11	22.29	24.71	20.69	23.16	24.38	24.07	24.15	28	28.96	27.23	23.7
ncbi_101754036	--	113.83	174.1	144.54	338.11	408.81	376.84	102.81	89.09	83.65	77.33	63.37	73.08
ncbi_101754042	--	0.1	7.52	11.76	10.34	12.94	12.62	19.18	17.18	19.13	15.27	6.39	16.48
ncbi_101754044	At1g33420	15.4	17.56	12.62	26.89	16.68	25.76	2.04	2.03	2.4	1.54	3.52	2.18
ncbi_101754045	HSP22.3	4.26	6.45	4.41	4.37	3.85	5.89	12.32	12.8	11.31	16.98	19.6	9.33
ncbi_101754046	At2g40280	2.29	2.4	2.8	1.65	2.76	2.59	6.25	9.07	8.57	5.29	5.94	6.05
ncbi_101754050	--	0.65	0.7	1.42	2.78	2.27	2.06	4.06	5.67	5.39	3.77	4.4	4.06
ncbi_101754052	PUB44	30.98	26.89	28.46	22.62	22.98	19.78	27.67	29.89	29.31	33.16	34.35	26.11
ncbi_101754055	At1g64760	7.86	14.6	24.2	4	9.16	8.54	2.37	6.99	7.17	1	1.57	1.55
ncbi_101754056	CRPK1	16.73	25.26	8.13	28.86	22.71	27.56	12.15	13.07	11.48	4.42	3.52	5.14
ncbi_101754057	RGA2	0.37	0.25	0.61	0.16	0.47	0.21	1.48	1.35	1.68	2.16	0.72	1.75
ncbi_101754060	TD1	20.51	18	17.2	40.86	32.98	27.51	12.49	17.56	15.79	8.96	9.01	7.98
ncbi_101754063	mfsd5	1.22	0.84	1.21	2.01	2.29	1.68	1.62	2.82	2.9	0.93	1.6	1.45
ncbi_101754069	TPX2	1.65	1.4	1.35	2.88	2.07	2.71	1.86	1.49	1.55	1.28	1.9	1.46
ncbi_101754071	--	0.55	0.46	1.19	0.5	0.45	0.97	1.1	1.18	0.88	1.42	1.55	1.19
ncbi_101754072	--	1.85	1.91	3.88	4.15	3.42	3.57	11.29	10.69	7.36	7.36	5.64	8.22
ncbi_101754074	At4g31140	0.06	0.04	0.08	0	0.02	0.04	0.12	0.07	0.12	1.19	2.08	0.56
ncbi_101754075	At2g39795	1.25	0.94	1.98	0.76	1.09	1.42	8.96	11.58	7.05	3.41	4.47	6.47
ncbi_101754077	CSTLP1	1.75	1.37	2.31	1.41	1.27	1.43	3.61	3.66	3.54	2.78	4.02	3.04
ncbi_101754078	HSFA9	192.87	191.2	153.25	137.6	124.85	144.86	42.43	81.5	65.59	20.33	27.7	26.14
ncbi_101754079	At1g19340	0.6	0.52	0.92	0.41	0.68	0.63	1.27	1	0.61	1.05	0.97	1.01
ncbi_101754080	PUP3	4.05	2.87	1.54	22.1	19.48	27.12	0.85	2.13	1.05	0.25	0.15	0.6
ncbi_101754087	PHT1-3	0.4	0.18	0.39	0.16	0.19	0.2	6.9	3.94	0.95	1.32	0.78	0.37
ncbi_101754088	PAT1	5.76	5.3	7.48	7.39	10.57	11.23	10.85	10.07	9.38	16.19	14.16	14.56
ncbi_101754090	--	8.07	5.75	7.63	8.85	10.76	11.92	12.69	11.75	11.49	11.24	12.79	12.76
ncbi_101754093	--	0.74	2.72	2.69	1.32	5.47	4.75	7.7	17.66	5.69	3.98	2.58	1.8
ncbi_101754095	ISS1	15.32	13.28	21.59	16.23	17.53	14.37	50.33	34.49	33.02	61.77	52.22	46.19
ncbi_101754097	--	2.71	1.61	2.7	1.82	1.84	2.66	7.07	7.11	7.58	4.61	6.44	5.31
ncbi_101754099	At5g18500	0.86	0.85	2.29	0.54	0.9	0.63	2.3	3.12	2.29	1.08	1.15	1.39
ncbi_101754101	KIN13B	5.83	5.12	6.13	1.8	2.62	1.3	2.2	6.16	10.46	1.87	1.99	2.61
ncbi_101754103	PGK1	1.85	1.44	1.92	2.04	2.35	1.68	3.16	3.37	3.45	4.08	3.72	3.62
ncbi_101754105	PERK13	0.02	0.02	0.11	0.05	0.04	0	3.23	1.8	0.12	0.4	0.43	0.28
ncbi_101754107	SMC2-1	2.18	1.8	2.26	2.09	2.56	1.98	1.71	1.66	2.23	1.8	1.85	1.54
ncbi_101754108	--	94.98	93.12	88.06	72.29	63.47	75.19	149.28	106	80.09	107.31	111.73	103.79
ncbi_101754109	SINAT2	0.61	0.7	1.09	0.17	0.44	0.42	0.23	0.99	0.19	0.25	0.78	0.78
ncbi_101754110	CLPX1	30.63	28.73	30.44	26.87	30.75	30.02	33.89	26.95	26.29	36.51	32.44	29.16
ncbi_101754112	FBA1	97.25	70.7	89.24	113.8	106.03	95.84	233.34	193.86	165.58	139.52	123.57	164.7
ncbi_101754115	NPF5.10	0.61	0.13	0.45	0.38	0.26	0.19	8.07	1.8	1.08	4.54	6.13	1.39
ncbi_101754118	ABCB2	0.86	0.44	0.79	0.46	0.82	0.8	0.23	0.43	0.31	0.55	0.56	0.5
ncbi_101754120	At2g33840	4.94	4.35	7.58	8.21	7.48	6.8	24.05	25.86	21.34	19.46	20.18	15.49
ncbi_101754121	PIN1A	1.88	2.55	4.47	1.36	2.02	1.41	9.08	8.06	10.01	8.5	5.11	12.22
ncbi_101754123	Imp3	4.82	5.63	5.28	5.75	6.12	6.14	9.88	9.59	6.09	7.8	6.72	7.48
ncbi_101754127	UFC	1.08	1.07	2.04	0.36	1.12	0.75	4.97	5.38	5.8	6.66	5.65	6.06
ncbi_101754133	--	0	0.2	0.14	0	0.47	0.07	0.8	0.62	0.35	1.69	1.4	0.83
ncbi_101754135	--	1.25	0.92	1.11	0.54	0.45	1.15	2.18	1.95	1.6	2.44	2.67	1.9
ncbi_101754136	UGT76B1	7.65	5.39	8.91	1.48	3.13	1.56	9.54	13.72	17.47	17.54	20.28	18.67
ncbi_101754140	TBL14	2.8	2.38	4.67	3.74	4.18	3.38	6.12	5.42	5.53	4.37	4.52	4.41
ncbi_101754141	ASHH1	3.67	3.84	4.36	2.05	3.37	3.17	7.55	5.71	6.95	7.75	7.86	6.82
ncbi_101754142	PUX4	41.07	40.49	43.03	51.12	54.75	49.62	70.54	61.09	51.47	56.32	54.07	59.38
ncbi_101754144	INT1	8.5	8.53	13.97	10.03	14.54	11.9	20.51	13.95	11.93	28.56	31.38	28.02
ncbi_101754145	TRAPPC2	9.28	7.27	11.65	7.35	9.52	9.39	18.95	15.87	12.85	14.07	14.07	14.69
ncbi_101754148	rpc25	0.37	1.11	1.63	0.62	0.84	0.57	6.28	5.54	4.48	2.45	2.34	1.85
ncbi_101754149	yabD	6.4	7.73	6.35	7.48	7.66	8.11	7.12	10.36	10.82	6.44	7.97	6.78
ncbi_101754150	ERN1	0.12	0.22	0.09	0.27	0.07	0.11	0.64	0.6	0.45	1.33	1	1.3
ncbi_101754153	--	6.67	5.48	9.62	3.9	5.89	6.97	182.51	70.91	29.94	109.34	90.01	81.12
ncbi_101754154	IPMSA	8.7	10.6	12.62	10.6	13.72	16.1	29.11	24.75	19.4	20.86	18.19	15.13
ncbi_101754155	--	4.01	4.25	0.85	1.23	2.25	1.67	3.42	4.6	7.18	4.29	0.59	5.5
ncbi_101754167	TFIIAy	28.09	31.39	31.12	39.73	47.26	45.87	41.42	42.31	39.49	40.54	42.22	55.14
ncbi_101754169	--	0.99	1.71	2.69	1.71	1.95	1.5	0.4	1.16	1.49	0.36	0.8	0.72
ncbi_101754170	--	3.73	4.17	5.64	3.13	3.69	4.28	8.1	5.61	7.49	7.23	5.01	4.89
ncbi_101754172	TULP9	59.53	49.65	38.69	58.19	59.47	73.77	36.72	32.63	30.2	22.41	26.55	30.84
ncbi_101754176	RLCK185	12.3	10.72	12.74	13.4	18.12	16.99	15.49	15.43	15.51	16.88	15.98	18.77
ncbi_101754181	PRPF18	5.81	1.93	1.78	5.5	0.49	1.12	17.12	12.44	8.88	24	17.2	8.16
ncbi_101754186	RF2	6.04	5.84	7.37	6.02	7.28	7.58	12.3	12.74	11.78	9.48	10.26	9.46
ncbi_101754187	COX5B-1	6.79	6.09	8.39	2.5	3.35	2.94	11.79	12.74	12.36	9.72	10.57	9.47
ncbi_101754188	ARF	10.47	8.32	11.7	7.48	9.09	9.5	17.61	16.49	17.44	18.89	18.68	18.84
ncbi_101754189	PUB70	5.29	5.41	4.89	3.88	5.13	5.23	5.23	7.29	8.11	2.92	4.51	3.31
ncbi_101754190	At5g52780	6.61	7.64	6.84	3.84	6.34	6.78	3.76	4.93	9.7	10.01	12.33	14.77
ncbi_101754192	CURT1A	151.72	146.1	152.14	66.64	102.24	66.36	169.38	272.2	313.39	428.96	373.21	456.11
ncbi_101754193	--	7.4	5.02	8.21	6.97	6.12	6.55	11.15	12.7	10	8.05	7.8	8.41
ncbi_101754195	At3g12390	23.92	22.27	34.44	37.49	38.77	38.97	68.02	72.3	55.24	45.34	42.45	54.46
ncbi_101754196	--	34.1	30.66	36.4	30.82	30.39	28.62	35.43	37.76	33.67	33.71	34.36	35.13
ncbi_101754197	PIP5K2	1.1	0.94	0.55	0.6	0.21	0.18	0.1	0.72	1.12	0.12	0.19	0.12
ncbi_101754198	PRR73	354.21	312.02	277.43	262.32	302.1	269.11	284.15	254.58	267.91	275.11	265.15	233.15
ncbi_101754199	ILL6	22.52	22.99	29.35	38.53	53.75	43.72	33.16	32.58	33.55	29.16	23.06	40.79
ncbi_101754200	--	3.04	4.09	1.84	1.11	0.7	1.68	5.99	6.94	8.43	10.39	8.7	9.18
ncbi_101754201	--	0.47	0.3	0.81	0.48	0.44	0.43	1.91	2.91	2.03	1.42	1.87	1.2
ncbi_101754213	RPS5	25.71	22.7	33.52	30.68	35.97	29.96	85.82	109.54	90.17	66.97	57.22	78.51
ncbi_101754215	PERK8	1.72	1.91	1.76	1.29	1.47	1.41	1.93	2.39	2.91	0.79	0.95	1.18
ncbi_101754217	NET4A	27.91	25.32	30.99	42.05	43.89	31.98	75.19	41.57	32.96	33.61	30.4	22.8
ncbi_101754219	--	3.14	3.34	4.51	2.18	2.78	2.8	4.57	4.79	5.1	6.7	6.25	7.32
ncbi_101754220	GF14C	48.1	44.61	58.75	90.85	111.35	102.62	57.44	55.72	49.14	44.1	54.17	53.21
ncbi_101754222	MOT2	4.52	3.26	4.09	4.47	7.9	6.93	13.11	7.35	8.69	13.53	9.69	17.71
ncbi_101754223	UGT88F4	11.84	13.67	10.13	5.78	6.06	5.53	8.36	9.83	9.08	13.24	12.44	18.34
ncbi_101754224	At4g29120	8.92	6.98	8.32	7.08	10.35	6.93	11.7	14.35	13.5	20.79	21.47	27.9
ncbi_101754225	At4g18490	1.9	2.82	2.82	0.86	1.63	1.82	2.96	3.8	3.4	2.72	1.91	2.97
ncbi_101754226	--	0.91	1.04	2.6	0.1	0.13	0.08	0.44	0.74	1.15	0.34	0.41	0.18
ncbi_101754228	H2B.11	3.87	1.63	2.15	7.68	6.01	6.64	4.08	1.91	2.02	3.54	3.15	2.12
ncbi_101754229	HTR2	7.23	5.69	9.28	11.05	9.68	9.44	25.14	10.06	8.98	15.88	15.09	18.46
ncbi_101754230	RBG2	9.42	6.21	12.99	11.13	15.93	18.63	38.67	28.57	20.68	13.53	11.05	11.43
ncbi_101754231	Ufd1	31.51	27.5	38.36	26.7	27.65	28.44	62.66	53.95	45.04	64.88	59.83	53.57
ncbi_101754232	CKX4	82.57	19.81	13.99	102.04	33.85	36.45	50.25	23.86	28.26	33.04	36.07	35.5
ncbi_101754236	PMEI8	2.01	2.47	2.92	1.94	1.96	2.73	5.81	6.77	2.58	9.26	10.13	9.09
ncbi_101754238	TRAPPC2	0.62	1.04	1.85	0.83	0.8	0.77	1.7	2.81	1.65	3.1	2.32	2.06
ncbi_101754240	GTF3C3	9.1	9.11	11.12	6.4	7.1	7.28	17.31	15.88	14.9	16.35	16.74	15.21
ncbi_101754241	CSLF6	13.19	25.81	118.52	6.97	10.58	3.5	5.22	18.97	53.5	1.52	2.44	2.36
ncbi_101754242	Os06g0508700	17.22	21.14	18.4	20.48	20.06	24.81	12.59	14.01	16.66	13.17	12.27	13.54
ncbi_101754243	UGT85A24	0.51	0.08	0.47	0.16	0.19	0.24	2.24	0.77	0.49	1.02	1	0.31
ncbi_101754244	--	1.16	1.2	1.08	0.94	1.53	0.69	2.07	2.4	2.13	1.91	2.75	2.06
ncbi_101754245	XBOS35	4.26	6.66	7.46	3.48	5.83	4.65	7.87	7.57	11.5	5.41	4.84	5.69
ncbi_101754246	CYP28	36.58	36.46	40.42	26.85	32.31	28.77	25.28	30.23	35.51	45.28	46.85	56.84
ncbi_101754247	--	3	3.28	5.02	4.54	6.32	5.11	3.33	4.79	4.93	5.32	4.91	5.82
ncbi_101754248	SULTR1;2	22.72	26.03	17.26	29.92	34.11	37.44	28.08	30.11	35.65	17.11	17.14	19.03
ncbi_101754249	SKIP14	1.26	1.4	2.34	0.67	1.55	1.27	3.71	3.59	2.59	3.63	4.19	2.13
ncbi_101754250	--	4.17	6.43	4.75	1.71	4.32	5.72	38.19	48.04	40.01	10.9	24	14.68
ncbi_101754258	Os07g0147900	3.1	3.71	4.48	1.64	1.76	2.62	10.6	10.52	11.24	5.67	7.47	4.22
ncbi_101754262	VPS33	2.85	5.16	6.34	2.84	4.35	4.27	5.93	5.04	6.71	8.57	10.16	5.88
ncbi_101754263	TRX1	7.07	8.88	8.4	4.35	4.79	5.27	6.93	6.39	7.74	9.87	10.68	8.81
ncbi_101754264	elmoA	3.52	4.93	5.07	2.08	3.04	2.81	3.21	4.49	6.86	9.1	9.67	7.35
ncbi_101754266	--	2.38	2.24	2.52	1.1	2.19	2.25	4.78	4.39	5.41	7.38	6	6.45
ncbi_101754267	At1g07660	8.11	9.96	8.21	4.63	4.68	3.74	6.75	9.94	6.93	7.23	7.95	7.45
ncbi_101754268	IDH2	12.64	10.54	7.68	15.1	14.19	14.82	17.63	14.91	11.43	13.01	12.62	11.55
ncbi_101754271	--	0.52	1.27	0.52	0.38	1.03	0.91	0	0.23	0.42	1.67	1.07	1.45
ncbi_101754272		14.3	14.15	13.87	11.66	17.89	12.26	13.5	19.92	25.4	33.24	28.61	39.44
ncbi_101754273	Hgsnat	6.85	5.54	5.81	5.15	4.3	4.87	14.09	12.94	11.82	12.43	16.32	11.19
ncbi_101754274	RMD1	10	12.65	13.94	7.22	8.87	7.28	19.88	19.62	21.11	24.4	21.56	23.51
ncbi_101754282	MPHOSPH10	3.24	1.74	3.95	1.64	3.73	2.82	9.73	9.3	9.58	7.14	7.97	5.93
ncbi_101754285	TMN1	22.09	21.87	26.28	19.25	23.75	20.16	38.33	41	37.39	36.64	34.21	35.46
ncbi_101754288	HIPP39	0.85	1.56	1.78	2.01	0.79	1.51	1.18	2.01	3.14	1.53	1.23	1.25
ncbi_101754289	--	1.37	1.47	1.47	0.99	1.36	1.04	0.37	0.57	0.45	0.28	0.5	0.66
ncbi_101754292	--	940.79	937.11	702.66	1158.84	967.78	1067.06	649.92	555.06	477.68	273.11	340.94	347.23
ncbi_101754295	CBR1	28.74	34.28	46.75	30.51	31.64	30.56	56.98	49.59	42.82	43.46	45.49	42.6
ncbi_101754298	SPL9	37.11	34.87	32.77	36.48	41.92	35.67	36.85	31.35	30.24	33.23	31.65	31.05
ncbi_101754301	--	1.74	1.41	2.59	1.25	3.2	1.64	11.87	9.84	7.86	8.2	9.27	10.31
ncbi_101754302	CBP60B	27.04	28.74	28.99	27.99	31.12	28.64	22.17	23.32	26.05	30.66	27.39	22.51
ncbi_101754303	PHI1	75.76	72.94	67.67	67.52	78.36	75.23	131.54	105.65	97.86	129.31	114.26	101.66
ncbi_101754304	At3g52320	1.18	0.31	0.73	0.64	1.12	0.93	1.32	1.62	1.12	2.19	1.62	1.26
ncbi_101754305	MAPKKK5	146.06	156.69	124.76	147.83	164.58	137.75	49.26	70.93	74.82	34.59	36.11	40.61
ncbi_101754306	--	34.98	28.39	30.46	37.92	40.85	37.53	32.38	27.18	23.66	33.96	32.79	30.45
ncbi_101754313	CRK6	11.22	10.59	7.2	8.4	10.79	5.71	11.67	6.61	8.73	23.9	16.28	9.92
ncbi_101754314	LOGL10	15.8	21.14	34.11	47.28	65.46	57.91	4.08	13.18	11.15	12.72	13.15	19.98
ncbi_101754315	DPB	5.31	7.44	5.92	5.34	5.09	6.35	4.52	5.23	4.77	3.7	4.74	4.9
ncbi_101754319	SGPP	113.12	121.98	148.45	56.57	66.64	75.41	510.89	278.92	178.73	306.07	312.06	293.28
ncbi_101754321	--	8.67	10.62	10.25	8.06	9.29	7.68	21.81	22.47	21.67	21.4	19.93	20.55
ncbi_101754322	PPDK2	3.71	4.38	7.97	3.46	3.15	4.7	5.32	4.33	4.99	7.26	8.45	6.37
ncbi_101754325	--	1.93	2.16	1.22	3.62	4.55	4.02	1.25	1.31	1.09	0.34	0.38	0.91
ncbi_101754326	At2g18220	1.75	1.39	2.77	0.78	1.15	1.41	8.83	10.76	9.9	6.3	6.39	6.06
ncbi_101754328	RPS2	0.25	0.32	0.34	0.33	0.19	0.44	0.47	0.72	1.16	0.57	0.89	0.79
ncbi_101754329	RMD5	13.44	11.04	12.88	18.32	22.04	17.02	21.95	17.38	15.78	21.63	19.26	23.32
ncbi_101754330	PAP17	6.82	1.18	6.66	1.76	1.16	1.1	284.17	111.66	53.7	143.33	103.86	84.33
ncbi_101754334	--	2.09	2.53	3.62	4.05	5.61	5.57	5.85	5.03	6.14	12.79	8.51	6.27
ncbi_101754335	kdgK	4.72	4.11	7.61	4.74	5.09	4.5	10.87	13.3	9.14	9.42	10.02	8.6
ncbi_101754344	MTB1	17.28	16.05	17.5	16.93	19.57	17.58	9.31	9.47	9.87	11.46	11.08	10.15
ncbi_101754349	LRK10L-2.1	0.47	1.31	0.9	0.83	2.32	1.08	1.29	1.47	2.09	0.5	0.65	0.44
ncbi_101754350	LNK1	252.14	262.22	272.51	183	213.18	191.88	230.24	240.32	270.4	357.61	343.96	317.67
ncbi_101754351	yipf1	21.74	20.17	19.21	25.93	30.83	26.1	18.67	22.7	18.88	9.87	9.42	10.21
ncbi_101754352	CBSCBS2	6.76	6.21	11.59	5.92	7	5.26	13.86	16.32	16.76	20.56	19.37	19.05
ncbi_101754354	--	0	0.21	0.1	0.43	0.27	0.11	0.22	1.62	0.98	0.47	0.96	0.73
ncbi_101754356	--	3.63	2.8	5.16	2.86	4.07	3.46	9.58	8.39	6.91	8.97	9.8	8.86
ncbi_101754357	--	0.09	0	0.1	0.02	0.08	0.02	7.41	1.73	0.37	1.03	1.7	0.63
ncbi_101754358	MED18	2.03	1.33	1.86	1.05	2.41	2.18	3.86	2.86	3.09	4.13	4.43	3.41
ncbi_101754359	Os01g0926400	0.28	0.34	0.68	0.49	0.28	0.32	0.74	0.35	1.11	0.64	0.62	0.37
ncbi_101754360	NFYC4	19.12	20.19	26.08	19.79	27.52	26.54	33.76	26.71	28.62	28.87	31.47	31.17
ncbi_101754361	--	4.22	2.91	6.55	5.64	5.6	5.42	4.26	6.06	7.44	10.06	8.92	7.88
ncbi_101754363	Os02g0139700	47	54.45	64.88	23.36	29.65	28.77	78.54	56.86	60.94	80.87	72.05	73.72
ncbi_101754365	--	0.35	0.19	0.54	0.55	0.53	0.64	2.19	1.51	0.95	2.07	2.64	0.92
ncbi_101754367	OR23	2.05	3.01	2.28	3.62	3.8	3.56	1.36	2.79	2.61	1.83	3.4	2.4
ncbi_101754371	CINV1	71.05	55.93	54.16	105.47	127.81	103.07	36.62	34.75	33.63	30.26	33.38	37.12
ncbi_101754372	RAB2A	40.75	48.89	54.58	45.09	46.12	43.32	46.26	41.81	39.27	44.53	45.59	46.64
ncbi_101754373	--	4.44	3.78	2.79	4.2	3.13	2.82	11.38	6.29	4.32	3.1	4.76	2.86
ncbi_101754375	EHD3	0.84	0.54	1.57	1.28	1.96	1.33	2.64	2.51	2.1	2.2	2.24	2.16
ncbi_101754376	Os02g0677700	37.21	27.87	25.98	34.66	27.46	24.11	30.05	32.56	31.09	33.27	32.45	29.36
ncbi_101754377	BHLH63	0.72	0.99	2.48	2.31	1.46	1.36	2.39	3.4	2.78	8.8	7.31	8.92
ncbi_101754379	WAP	2.89	2.19	2.98	2.51	2.67	2.45	7.93	8.8	8.61	9.73	9.46	8.75
ncbi_101754380	NAR-7	1.03	0.04	0.09	0.1	0.11	0.19	21.82	5.94	2.68	7.85	4.29	1.35
ncbi_101754381	EREBP1	171.54	160.19	186.47	241.92	270.36	280.03	150.47	115.13	95.74	53.71	57.95	66.49
ncbi_101754383	LYK3	1.92	1.55	1.54	3.94	3.46	3.91	2.16	2.6	2.44	1.67	3.89	1.74
ncbi_101754389	--	0.39	0.58	0.44	1.24	0.57	0.55	0.1	0.39	0.17	0.34	0.03	0.27
ncbi_101754391	EMB2247	9.21	11.8	12.81	9.37	12.27	9.57	9.63	13.63	14.28	15.15	14.94	15.15
ncbi_101754393	--	0.69	0.37	0.54	0.25	0.27	0.43	0.61	0.64	0.76	1.88	1.72	0.97
ncbi_101754395	CTR1	12.82	14.14	15.34	13.58	16.59	16.39	15.36	13.72	15.38	18.1	17.66	16.46
ncbi_101754396	MYB44	32.27	31.21	39.42	46.43	38.84	44.13	39.56	35.25	34.74	21.4	31.59	28.33
ncbi_101754398	--	1.88	1.68	2.2	2.31	2.68	1.84	1.49	1.58	1.83	1.64	1.77	1.61
ncbi_101754399	CLPC1	57.75	57.26	67.04	48.22	57.57	51.41	69.76	80.63	78.45	131.09	134.99	115.2
ncbi_101754400	FLZ6	11.05	8.45	10.65	13.99	19.04	21.25	39.45	32.8	40.17	39.2	34.42	45.31
ncbi_101754401	At2g24580	4.27	2.17	7.99	4.92	5.08	5.99	9.54	10.87	11.74	16.31	26.1	19.87
ncbi_101754402	dadA	7.52	5.56	6.63	5.06	7.21	6.79	13.69	15.36	16.42	9.56	9.92	10.22
ncbi_101754403	RMA1H1	9.93	7.68	9.59	38.59	30.16	26.47	25.73	22.8	22.41	15.65	15.82	17.51
ncbi_101754404	--	2.65	1.67	2.54	2.18	1.98	2.35	8.66	8.24	4.6	4.24	5.65	5.46
ncbi_101754405	EXLB1	0.71	0.21	0.42	0.37	0.48	0.17	6.94	2.24	0.36	0.92	1.23	0.97
ncbi_101754407	--	9.44	8.08	11.68	8.88	9.92	9.27	20.57	15.86	13.72	23.86	21.67	20.15
ncbi_101754408	SPHK1	22.32	17.41	16.74	34.42	31.69	32.34	32.18	21.56	23.8	26.64	29.74	27.68
ncbi_101754410	At1g71810	28.74	31.1	25.69	10.52	18	15.12	15.06	21.23	16.16	60.8	54.94	36.87
ncbi_101754411	SPP1	21.92	20.38	26.5	10.63	16.98	15.6	18.72	21.25	20.65	34.89	36.94	37.94
ncbi_101754412	CBSCBSPB3	34.39	33.21	38.46	22.36	28.28	21.91	31.32	33.99	30.14	56.4	55.5	52.87
ncbi_101754413	--	2.37	1.92	2.01	4.06	6.07	6.17	3.71	3.46	3.41	2.97	2.22	4.44
ncbi_101754422	VSR1	1.89	2	3.76	0.4	0.75	0.39	8.24	7.93	11.01	20.61	8.61	18.38
ncbi_101754426	Os03g0167500	7.87	6.25	10.34	10.69	19.55	16.04	5.34	10.79	10.33	8.98	9.76	8.17
ncbi_101754427	--	6.79	6.8	8.21	3.92	5.24	4.55	3.8	6.36	7.17	13.1	16.38	14.99
ncbi_101754429	NUDT9	6.11	6	5.28	4.26	3.8	4.35	9.54	8.32	7.02	10.3	8.95	7.73
ncbi_101754431	--	1.26	1.27	1.25	1.52	1.92	0.76	3.5	2.13	1.32	7.62	3.52	3.42
ncbi_101754432	EXPB3	1.79	1.47	2.06	1.02	1.4	1.01	5.24	5.44	3.58	5.04	4.4	5.48
ncbi_101754433	apaG	71.6	43.71	59.88	38.4	52.02	41.85	72.65	72.08	70.03	98.47	85.09	103.31
ncbi_101754438	--	2	2.03	3.88	2.01	2.3	2.21	7.25	4.56	6.87	8.42	3.74	6.7
ncbi_101754440	LAC12	0.23	0.08	0.32	0.06	0.02	0.02	1.22	0.22	0.26	0.34	0.59	0.54
ncbi_101754448	BHLH106	0.14	0.3	1	0.55	1.5	1.81	0.56	0.59	0.43	0.11	0.39	0.32
ncbi_101754449	DGK1	4.98	6.55	8.85	3.8	6.1	6.32	12.86	9.31	12.37	12.71	12.21	10.45
ncbi_101754450	LRK10L-1.5	1.85	1.14	1.92	0.98	1.72	2.13	1.44	2.23	1.54	0.59	1.08	1.5
ncbi_101754451	At5g10920	13.86	11.28	8.25	41.27	32.67	30.16	15.41	15.15	10.59	5.37	6.58	4.72
ncbi_101754452	Os12g0611200	26.86	15.47	18.38	13.21	17.49	17.69	31	32.07	28.94	24.89	23.9	23.26
ncbi_101754453	NPF2.11	47.19	53.63	75.71	167.88	243.21	159.03	15.25	30.38	41.13	9.6	10.67	14.23
ncbi_101754455	At3g49725	1.46	1.22	2.21	1.18	1.08	1.11	4.84	4.6	3.77	6.92	5.16	5.16
ncbi_101754456	At4g01570	1.43	1.01	1.55	1.15	2.13	1.14	0.76	1.31	1.21	1.01	1.09	1.19
ncbi_101754459	At1g30440	0.82	0.93	1.57	1.47	1.49	2.05	2.49	3.2	3.5	4.53	3.5	3.2
ncbi_101754462	WDS	8.26	5.85	7.93	8.35	9.4	7.91	36.97	28.17	25.97	49.78	40.36	37.86
ncbi_101754464	eif2b2	3.8	3.5	5.54	2.67	3.3	2.7	10.27	11.98	10.2	9.49	7.5	8.28
ncbi_101754466	ACS12	33.68	21.7	23.54	30.3	34.63	31.15	39.71	36.54	35.13	52.82	57.51	47.12
ncbi_101754467	RNU1	71.3	74.28	80.73	55.36	62.96	64.89	97.87	71.75	86.93	93.65	86.94	75.64
ncbi_101754468	CTR1	45.75	42.47	43.84	33.71	28.38	31.56	13.36	13.81	17.95	9.26	10.38	9.85
ncbi_101754470	2MMP	77.19	89.97	49.99	87.84	90.87	101.14	73.31	99.64	75.48	8.83	16.13	21.55
ncbi_101754471	Cdc40	5.63	4.98	7.54	4.82	5.86	4.46	10.85	10.37	10.85	16.03	15	13.87
ncbi_101754472	--	18.63	14.24	22.64	27.67	25.25	21.62	41.8	48.68	38.89	9.58	17.5	17.52
ncbi_101754473	DGAT2D	10.29	9.81	9.39	6.54	5.46	6.18	15.2	11.19	12.76	13.59	17.43	13.26
ncbi_101754474	--	1.1	0.94	1.22	1.29	1.06	1.46	4.96	4.61	3.48	3.03	4.28	4.72
ncbi_101754475	TPS6	3.6	3.39	5.99	2.24	2.77	3.35	16.09	14.98	17.67	11.93	11.68	10.92
ncbi_101754476	CLT2	1.98	2.82	2.86	2.48	2.68	1.66	3.03	3.26	2.14	2.72	3.09	2.53
ncbi_101754477	At4g14600	49.4	53.37	70.04	57.01	57.46	56.05	30.31	34	32.26	16.72	18.58	20.02
ncbi_101754478	SUS7	0.14	0.13	0.28	0.05	0.17	0	0.3	0.27	0.38	0.06	0.35	0.16
ncbi_101754486	Trappc1	14.92	13.21	18.03	13.66	16.94	17.26	22.63	23.77	18.12	21.2	19.58	24.42
ncbi_101754488	--	1.32	1.48	1.81	1.49	2.4	2.74	2.5	3.22	2.84	2.07	1.71	2.82
ncbi_101754492	UCC1	7.02	12.06	15.49	13.65	12.06	11.15	9.6	26.43	30.58	2.47	2.59	4.32
ncbi_101754493	UBC2	33	44.85	39.51	35.5	46.22	36.64	46.7	48.09	47.82	41.56	39.13	48.94
ncbi_101754495	CALS7	0.2	0.25	0.26	0.23	0.18	0.07	0.23	0.17	0.18	0.25	0.27	0.13
ncbi_101754497	mis3	6.27	6.39	8.5	5.63	5.82	5.32	13.68	14.51	14.38	12.7	13.01	10.63
ncbi_101754498	MRL7	4.02	3.34	5.01	2.45	3.37	2.62	3.54	5.43	7.36	6.12	7.51	7.21
ncbi_101754499	--	0.27	0.15	0.39	0.15	0.22	0.23	0.56	1.18	0.83	1.57	0.65	0.77
ncbi_101754500	SKP2A	28.26	15.04	13.48	37.91	17.1	17.34	17.37	6.63	9.91	16.5	23.95	11
ncbi_101754501	EDR1	10.06	10.74	13.04	6.55	9.23	9.58	11.92	12.21	14.38	13.52	13.77	14.33
ncbi_101754502	SERGT1	2.61	2.63	4.02	3.06	4.58	2.7	2.78	3.57	3.87	6.16	7.67	7.24
ncbi_101754503	LRP1	2.17	1.55	1.43	1.33	0.98	2.27	2.14	1.3	0.7	1.46	1.11	0.95
ncbi_101754511	--	0.56	1.41	0.61	0.51	0.46	0.48	0.32	0.71	0.52	0.32	0.25	0.56
ncbi_101754513	DJA7A	37.15	31.19	36.52	25.83	35.29	31.77	42.15	48.24	45.4	97.01	85.71	86.42
ncbi_101754516	UCC1	452.04	328.5	209.47	1127.49	856.82	805.98	314.74	351.85	267.11	38.11	92.82	90.84
ncbi_101754517	PPD3	37.81	52.3	54.06	32.49	44.11	35.23	32.37	45.02	44.4	77.65	69.38	86.24
ncbi_101754518	fadD28	0.28	0.34	0.3	0.12	0.24	0.27	3.57	2.49	0.92	1.11	1.23	0.71
ncbi_101754520	MDH1	1410.89	1534.72	1384.53	621.69	855.85	809.36	777.49	1285.45	1369.52	1742.54	1505.87	1952.8
ncbi_101754530	RABA1F	1.46	1.98	1.84	3.56	4.2	3.49	4.3	3.41	2.34	3.52	2.69	2.89
ncbi_101754531	Cenpv	0.47	0.79	0.77	1.44	1.39	1.23	1.11	0.57	0.98	0.86	0.9	1.18
ncbi_101754532	RBL10	45.97	47.96	44.93	28.44	34.58	36	46.89	51.32	62.56	78.88	74.53	84.23
ncbi_101754535	UGE-3	13.98	7.27	6.17	50.45	31.45	31.56	1.94	2.42	1.37	7.53	12.25	9.63
ncbi_101754536		25.72	26.63	25.14	26.75	27.7	26.8	18.91	20.48	21.12	22.07	20.33	17.8
ncbi_101754537	Ipo5	54.52	76.08	61.25	60.62	55.54	57.17	37.98	61.62	67.9	30.84	28.35	29.06
ncbi_101754538	MAF1	3.44	3.19	3.3	5.16	4.41	4.03	8.3	9.61	7.7	7.56	7.21	7.78
ncbi_101754539	CIPK21	9.81	12.43	12.05	19.59	23.32	22.55	8.93	15.1	21.38	17.2	18.72	12.76
ncbi_101754540	RBL19	2.29	1.55	2.9	2.97	3.86	2.78	6.57	5.71	6.18	8.1	6.09	6.84
ncbi_101754541	RLCK185	6.17	6.81	12.26	12.75	14.02	11.27	18.67	13.41	16.54	13.94	11.13	11.2
ncbi_101754543	GSVIVT00023967001	6.74	4.41	7.13	5.88	7.63	4.61	2.6	2.92	3.09	1.84	0.86	2.28
ncbi_101754557	ACBP4	9.58	8.2	12.66	9.75	12.29	9.62	23.16	18.85	20.43	23.62	21.1	22.83
ncbi_101754558	--	14.83	18.01	22.36	4.12	5.49	8.37	6.68	11.57	20.81	36.81	33.2	43.46
ncbi_101754560	--	3.22	2.76	2.38	3.64	4.51	3.54	4.29	3.57	2.48	3.47	3.75	4.85
ncbi_101754562	RPL21M	1.27	0.74	2.32	1.25	1.42	0.93	9.65	11.81	8.83	6.08	6.11	6.8
ncbi_101754563	NMT2	63.07	63.39	254.07	24.28	36.34	22.12	30.75	246.37	582.07	73.31	154.11	71.16
ncbi_101754565	PIP	5.5	6.32	9.95	8.03	8.79	6.16	22.84	22.79	20.87	19.79	18.03	13.38
ncbi_101754568	CCR4-4	12.3	14.75	15.85	21.33	19.56	23.46	14.45	15.74	14.89	10.81	11.9	10.65
ncbi_101754569	GAUT6	24.5	21.83	23.86	19.4	22.03	19.69	35.85	34.9	32.26	20.23	17.8	18.73
ncbi_101754572	PLT5	5.61	3.22	4.41	1.99	2.76	2.19	10.91	11.26	12.68	2.79	5.33	5.85
ncbi_101754580	NPF8.3	1.35	2.5	4.69	1.54	1.2	1.3	1.98	3.6	3.65	1.17	0.64	1.47
ncbi_101754581	--	7.24	7.87	9.22	8.75	11.38	8.05	19.61	19.94	21.41	15.29	13.32	14.84
ncbi_101754582	cnot1	24.13	26.23	29.68	21.26	23.38	22.59	20.32	21.62	24.18	31.72	30.92	24.42
ncbi_101754585	--	18.17	16.53	13.58	46.74	36.4	27.21	18.59	17.95	18.84	2.53	3.18	3.95
ncbi_101754586	CCR4-3	12.44	14.67	17.31	7.96	11.64	10.12	20.39	18.67	17.9	23.1	23.15	19.65
ncbi_101754587	--	5.41	5.97	8.19	7.38	7.21	9.25	4.88	6.6	8.59	14.17	11.36	14.72
ncbi_101754588	--	15.21	15.95	11.65	13.19	8.31	21.17	0.89	1.78	2.98	0.51	1.26	1.4
ncbi_101754589	ZBP14	77.82	86.92	106.15	47.52	62.96	62.96	108.23	108.76	105.41	99.91	109.45	116.47
ncbi_101754590	TENA2	6.11	4.91	8.43	6.52	6.27	7.58	13.83	10.55	12.89	8.08	7.87	7.28
ncbi_101754592	IPO5	3.73	3.1	4.98	3.29	3.43	3.31	6.94	10.92	10.68	6.15	6.75	6.84
ncbi_101754593	--	32.16	19.55	22.76	31.98	32.23	35.7	30.68	31.71	27.83	48.67	46.56	29.98
ncbi_101754595	--	8.71	8.61	9.61	7.45	9.7	9.87	10.28	11.03	10.88	15.84	14.41	13.01
ncbi_101754597	KRP5	3.28	3.03	2.36	4.78	4.59	5.57	5.6	5.12	4.12	6.49	5.21	5.47
ncbi_101754598	MLO-H1	58.54	64.61	55.5	65.38	110.99	127.84	15.69	15.74	20.7	13.76	21.93	29.57
ncbi_101754599	At1g07660	7.66	8.57	6.66	4.9	5.45	4.14	20.06	7.39	4.6	12.35	14.06	16.62
ncbi_101754602	--	12.32	9.06	6.83	16.65	19.52	15.21	62	22.76	21.12	31.32	36.54	34.34
ncbi_101754608	--	20.33	19.22	24.61	16.29	20.94	18.42	41.29	36.54	33.58	50.47	47.55	46.28
ncbi_101754614	RPL11	25.97	28.46	31.5	37.94	45.7	42.27	85.34	98.64	79.75	63.67	57.37	71.07
ncbi_101754616	PCMP-H40	0.57	0.5	0.91	0.18	0.48	0.44	1.46	1.22	1.08	1.19	1.6	1.35
ncbi_101754617	--	94.19	64.08	65.96	149.08	134.1	112.07	95.73	101.17	85.31	71.24	65.11	80.58
ncbi_101754618	LOS1	31.17	40.61	35.87	48.57	47.25	57.67	42.12	72.36	57.41	70.8	42.38	61.72
ncbi_101754619	STI	0.19	0.45	0.56	0.09	0.13	0.07	0.76	1.15	1.26	1.02	0.74	0.86
ncbi_101754620	UBC7	217.32	157.42	159.62	562.1	552.43	573.63	64.5	59.24	71.24	33.34	32.08	38.74
ncbi_101754621	IPP	0.41	0.59	0.92	0.41	0.59	0.7	2.27	1.47	0.87	1	1.24	1.14
ncbi_101754622	ILK1	14.04	13.24	9.38	12.4	19.1	22.72	0.85	0.75	0.68	0.56	0.46	0.49
ncbi_101754625	WRKY71	536.04	588.5	674.38	361.62	336.84	371.3	754.9	796.18	754.04	298.81	569.53	611.3
ncbi_101754626	HXK3	12.8	10.84	10.76	22.95	21.99	15.66	10.93	10.99	11.07	5.4	5.7	6.16
ncbi_101754629	At2g33490	61.33	62.08	47.9	53.9	36.82	43.02	15.48	25.25	27.25	2.98	5.09	5.82
ncbi_101754633	ATL71	0	0.26	0.18	0.2	0.3	0.1	0.2	0.21	0.06	0.74	1.1	0.91
ncbi_101754634	UGT85A24	82.01	127.35	155.53	375.91	430.13	610.91	8.43	8.16	11.01	2.03	2.62	2.56
ncbi_101754636	--	0.26	0.06	0.19	0.17	0.25	0.09	1.04	1.43	0.66	1.26	0.56	0.72
ncbi_101754637	MYB20	4.38	2.89	2.53	3.08	3.71	3.01	1.96	2.94	2.41	2.11	3.85	1.07
ncbi_101754639	RHC1A	15.73	16.86	14.43	14.09	13	13.52	11.64	12.82	13.03	5.83	7.48	7
ncbi_101754640	ACL1.3	5.45	2.27	4.61	5.15	4.97	5.9	11.43	10.42	5.6	7.89	8.5	8.02
ncbi_101754642	PP2B1	6.05	5.67	9.13	5.85	12.6	10.41	22.21	13.1	11.19	10.26	10.99	13.55
ncbi_101754645	At2g04230	5.32	3.31	2.66	3.34	5.48	4.15	4.24	5.46	4.82	4.98	2.65	5.93
ncbi_101754647	At4g09190	0.28	0.56	0.42	0.27	0.43	0.52	2.51	2.09	2.16	2.12	2.11	1.8
ncbi_101754649	RPL44	35.82	39.41	57.38	33.62	39.41	33.6	115.62	124.6	98.24	93.67	83.64	92.25
ncbi_101754652	--	0.56	0.64	1.18	1.18	1.68	0.91	1.73	1.42	1.82	1.87	1.88	2.18
ncbi_101754653	WRKY12	0.43	0	0.35	0.04	0.13	0.14	0.49	0.52	1.3	0.39	0.69	0.54
ncbi_101754654	Os04g0338000	75.03	59.58	53.08	41.24	26.35	27.5	94.95	122.9	124.09	113.18	301.43	84.48
ncbi_101754655	PFP-ALPHA	1.23	1.46	1.44	0.53	0.72	1.06	1.23	2.92	3.04	1.21	1.18	1.99
ncbi_101754656	HDA9	5.86	5.87	7.13	4.74	5.35	5.24	17.36	12.87	12.79	15.95	15.48	13.84
ncbi_101754658	--	3.69	3.33	7.04	7.65	8.17	7.39	4.89	6.53	4.29	4.45	4.92	5.33
ncbi_101754659	GALT3	3.48	5.24	7.71	2.02	2.14	2.2	9.22	6.69	6.96	0.38	1.16	1.65
ncbi_101754660	--	0.59	0.83	2.12	1.19	1.66	1.45	4.05	4.78	3.99	4.51	5.59	5.22
ncbi_101754662	PILS7	10.58	3.55	6.3	21.93	13.81	10.53	14.48	7.21	5.72	15.07	10.63	8.15
ncbi_101754664	RIDA	14.91	19.47	32.99	10.85	15.28	14.85	31.38	42.61	46.11	38.53	43.73	39.85
ncbi_101754666	MORF3	2.33	1.96	1.74	3.7	3.54	3.01	7.7	7.52	4.53	4.5	5.76	5.39
ncbi_101754668	APX2	531.39	422.45	381.7	601.14	515.98	514.48	868.38	943.9	732.38	1000.65	869.52	858.1
ncbi_101754679	Ecpas	11.28	13.1	12.13	14.74	10.95	17.87	10.84	11.62	12.41	14.77	18.92	11.59
ncbi_101754680	COQ5	9.35	9.89	12.95	5.4	6.49	6.13	20.74	16.67	19.24	26.13	21.27	19.73
ncbi_101754682	MYB4	1.32	0.42	0.5	1.04	0.36	0.42	1.65	1.66	1.44	4.8	2.09	1.57
ncbi_101754683	PUX7	9.39	10.51	12.88	12.31	13.67	11.64	17.37	19.05	16.61	15.02	18.29	15.52
ncbi_101754685	--	3.44	3.27	4.47	3.63	3.67	3.28	7.82	9.53	7.96	8.83	9.47	9.53
ncbi_101754686	dnaJ1	1.3	1.12	1.58	0.74	1.13	0.98	1.88	3.14	3.09	5.6	7.54	6.92
ncbi_101754687	RGA1	0	0	0	0	0	0	0	0	0	1.08	5.43	0.01
ncbi_101754690	osgep	1.5	2.65	4.2	2.05	2.01	2.47	13.68	12.17	9.84	10.45	8.27	10.17
ncbi_101754691	At4g32940	7.73	2.7	5.32	5.13	2.52	2.92	199.12	45.51	19.68	62.17	63.38	26.11
ncbi_101754695	SIRP1	4.59	5.19	5.87	6.47	10.85	7.51	9	5.22	6.73	8.77	7.56	6.2
ncbi_101754696	G1L8	0.14	0.29	0.17	0.15	0.53	0.12	1.08	2.35	1.77	0.37	0.58	0.37
ncbi_101754698	PUB27	5.7	10.32	4.81	2.8	4.09	7.15	5.06	2.87	3.87	4.16	5.91	4.78
ncbi_101754701	NAC083	58.55	30.25	49.58	77.75	84.11	61.48	55.15	21.52	17.9	43.18	43.84	30.61
ncbi_101754702	AO2	328.99	232.03	170.67	261.99	159.65	174.32	243.17	266.05	351.99	469.29	541.46	417.63
ncbi_101754703	PERK4	2.58	3.2	2.98	1.66	2.9	2.21	1.23	3.34	4.15	6.31	5.8	7.36
ncbi_101754705	At2g23060	0.16	0.2	0.16	0.13	0.25	0.16	0.67	0.9	1.42	5.2	3.3	3.91
ncbi_101754706	OsI_14861	3.17	3.45	2.41	0.85	0.47	0.8	12.55	7.59	2.37	38.59	26.87	27.19
ncbi_101754707	XRCC4	12.75	15.69	13.27	8.94	9.93	8.28	5.1	7.79	8.29	3.54	3.86	3.82
ncbi_101754710	At5g47430	78.05	64.32	67.56	69.29	71.53	72.75	47.08	62.91	64.37	28.93	39.34	37.79
ncbi_101754712	ACA3	5.7	4.26	7.86	5.6	8.25	8.25	8.58	6.46	6.38	5.75	6.1	5.4
ncbi_101754714	RPS27AA	0.45	0.28	0.56	0.42	1.07	0.56	1.67	0.73	0.78	1.32	1.12	1.04
ncbi_101754716	CYP71Z18	1.28	0.99	0.39	0.76	0.91	1.42	8.13	5.22	4.53	1.86	2.92	1.4
ncbi_101754719	--	1.1	0.69	1.64	0.67	0.68	0.71	2.88	3.85	3.85	4.16	3.85	4.3
ncbi_101754720	VAB	0.37	0.58	0.96	0.06	0.25	0.35	0.64	0.59	1.43	0.03	0.12	0.17
ncbi_101754721	TBL12	1.57	1.43	2.41	1.21	1.41	0.87	3.87	3.24	3.02	1.86	2.86	3.19
ncbi_101754725	--	2.18	0.99	2.38	1.45	2.37	0.95	20.62	10.43	11.02	15.33	7.96	7.35
ncbi_101754728	CPR1	0.41	1.07	2.01	1.22	1.06	1.75	0.28	0.58	0.69	0.25	0.19	0.04
ncbi_101754729	SFH9	3.9	3.09	3.43	4.41	4.15	3.47	34.78	18.41	7.85	8.86	9.05	7.58
ncbi_101754730	TIM21	2.3	2.76	4.14	1.25	1.69	2.11	7.78	6.72	6.3	6.72	5.62	6.6
ncbi_101754732	IP5P9	2.9	2.51	2.13	8	8.03	7.84	4.51	3.39	3.37	1.13	1.5	1.77
ncbi_101754734	--	1.54	3.32	3.06	1.97	1.71	3.05	7.92	7.19	6.34	8.61	9.14	7.24
ncbi_101754738	--	0.18	0.57	0.65	0.29	0.44	0.23	2.4	1.86	0.99	1.55	1.54	1.25
ncbi_101754742	RPD1	0.47	0.33	0.28	0.48	0.58	0.44	0.5	0.76	0.9	0.74	1.4	1.07
ncbi_101754751	MUCI21	226.3	320.56	364.67	148.96	220.23	355.08	387.36	382.49	374.42	182	295.52	308.98
ncbi_101754752	CCR4-6	13.81	13.53	16	11.76	14.19	12.32	16.61	19.27	19.28	23.33	23.92	23.69
ncbi_101754755	PCMP-H12	0.48	0.22	0.42	0.22	0.4	0.36	0.5	1.29	0.47	0.7	1.03	0.76
ncbi_101754757	KCS11	452.39	386.65	212.25	363.24	187.66	292.94	227.89	171.5	193.83	98.5	130.49	146.55
ncbi_101754759	Os01g0926600	2.38	2.21	4.63	0.98	0.63	0.55	3.66	6.74	11.36	1.53	1.99	2.63
ncbi_101754760	HCC1	1.5	1.57	2.64	1.41	2.63	1.92	7.05	8.58	6.75	8.31	7.95	6.81
ncbi_101754761	PRORP2	1.47	1.22	1.59	1.82	2.23	1.89	3.88	4.3	4.28	5.04	4.53	4.18
ncbi_101754762	At5g58090	0.34	0.27	0.21	0.63	0.59	0.51	1.23	0.97	0.79	1.55	1.18	1.26
ncbi_101754764	--	1.23	0.91	1.52	1.17	1.64	2.34	4.56	2.47	2.15	2.58	3.18	1.61
ncbi_101754766	At3g61800	3.72	2.38	3.95	5.2	5.03	4.14	5.13	4.87	3.82	6.94	5.97	5.44
ncbi_101754767	FBL23	1.39	3.35	2.32	2.66	3.94	2.77	3.83	6.19	5.9	3.99	4.37	4.45
ncbi_101754771	--	2.24	2.75	6.66	2.25	2.35	3.2	7.15	5.24	5.85	7.39	5.99	10.32
ncbi_101754772	--	2.7	1.14	1.77	2.51	2.61	2.69	4.14	3.52	2.74	2.54	2.46	2.41
ncbi_101754773	--	9.05	8.37	11.07	8.29	10.71	10.1	13.26	14.31	15.53	17.8	16.98	16
ncbi_101754774	--	0.88	1.8	0.85	1.22	2.05	1.66	2.33	1.49	1.18	1.09	1.57	0.96
ncbi_101754776	OsI_08463	20.18	7.9	29.05	3.14	3.79	3.66	91.91	56.69	52.81	138.66	126.92	163.16
ncbi_101754778	--	40.58	33.88	32.16	58.96	26.56	52.32	41.94	29.83	25.39	7.84	14.15	10
ncbi_101754779	COP1	22.98	21.97	29.67	12.47	17.62	21.06	54.24	48.68	56.1	93.88	78.33	73.48
ncbi_101754781	ASP5	456.01	525.09	426.85	379.65	541.2	450.79	190.46	321.57	348.37	459.09	411.21	471.56
ncbi_101754782	HDA6	12.72	9.19	13.48	7.54	11.22	9.64	18.27	16.2	21.81	23.41	23.55	26.23
ncbi_101754783	At4g14310	0.73	0.83	0.42	0.35	0.37	0.42	0.99	0.98	1.26	1.04	0.68	0.86
ncbi_101754784	PP1	56.69	54.33	59.47	68.17	82.02	76.52	70.3	71.84	73.56	54.01	56.88	61.4
ncbi_101754787	--	0.11	0.12	0.31	0.23	0.43	0.45	0.9	1.12	1.08	1.02	0.99	1.29
ncbi_101754792	RLP6	4.67	2.51	1.44	3.46	1.64	2.77	1.35	1.71	1.4	3.06	7.35	1.63
ncbi_101754794	--	0.17	0.06	0.19	0.08	0.03	0.06	0.91	0.85	0.95	0.75	0.66	1.16
ncbi_101754796	DDB_G0292320	11.76	10.05	12.84	10.83	12.09	10.68	20.31	21.12	18.58	16.85	18.52	19.62
ncbi_101754797	Os04g0379900	94.19	88.06	106.42	74.59	93.4	82.18	54.51	62.19	74.46	29.23	27.09	33.62
ncbi_101754798	CLPC1	171.15	122.43	53.99	136.69	72.51	71.43	40.04	53.98	57.65	61.21	56.62	55.36
ncbi_101754800	UBP27	2.69	3.4	3.96	2.4	3.2	3.19	4.91	4.4	4.33	6.16	6.02	5.46
ncbi_101754801	ARI8	21.67	20.43	23.98	21.71	24.45	24.7	28.55	24.18	26.99	29.34	28.14	26.69
ncbi_101754802	HEN4	0.98	0.61	1.46	0.83	0.86	1.55	4.37	5.06	4.14	2.67	3.66	3.22
ncbi_101754803	APT2	3.76	3.44	4.14	4.83	4.72	4.44	7.79	5.06	4.78	10.61	12.52	11.12
ncbi_101754804	--	1.2	0.64	0.95	1.33	0.88	0.82	0.79	0.55	1.01	0.87	1.12	0.5
ncbi_101754805	Os04g0530600	29.19	24.04	38.45	23.78	25.87	22.36	100.6	89	81.19	90.45	84.78	82.52
ncbi_101754806	--	7.52	6.42	12.62	6.64	5.93	5.71	26.94	20.75	22.28	19.18	22.02	14.75
ncbi_101754807	CDSP32	13.85	10.67	16.51	6.02	13.02	10.02	39.68	37.36	30.95	68	56.07	68.71
ncbi_101754809	NAD-ME1	45.8	41.61	40.84	42.26	48.46	46.81	40.89	39.86	46.05	35.45	28.67	34.32
ncbi_101754811	Os07g0563300	50.76	43.78	50.12	63.48	62.08	62.95	28.66	33.86	40.33	27.99	28.19	34.59
ncbi_101754812	Os04g0452000	27.44	25.22	27.45	28.95	36.9	33.44	39.99	33.49	34.93	32.18	37.86	33.57
ncbi_101754814	--	7.7	5.86	2.56	12.07	4.11	5.96	9.67	5.43	3.66	5.19	5.21	2.44
ncbi_101754815	ALDP	605.35	814.99	669.23	399.69	546.12	499.98	625.97	815.65	1181.38	874.11	802.04	1119.64
ncbi_101754816	HVA22J	28.34	34.93	18.7	37.26	37.52	41.02	23.97	19.06	12	10.06	14.5	10.85
ncbi_101754817	GAUT7	0.5	0.92	0.73	0.47	0.37	0.37	0.79	0.9	1.62	0.48	0.21	0.54
ncbi_101754825	efp	3.7	3.83	4.98	0.69	1.74	1.09	3.77	6.77	7.16	13.82	14	14.75
ncbi_101754827	MSL1	13.56	15.65	12.94	7.93	7.46	11.81	4.58	7.19	4.6	1.52	2.41	3.33
ncbi_101754829	RPC19	0.41	0.27	1.03	0.54	0.41	0.5	1.21	1.81	0.84	2.04	2.49	1.25
ncbi_101754831	TOMM70	5.49	5.72	9.8	4.56	3.47	4.81	15.71	13.88	13.26	16.42	15.3	12.52
ncbi_101754833	PPT3	16.55	9.79	9.08	5.65	12.1	5.5	9.91	11.21	7.71	3.66	6.15	6.79
ncbi_101754835	CBL6	0.09	9.66	16.32	10.06	13.12	12.28	18.39	17.76	21.18	33.69	35.54	29.77
ncbi_101754838	--	0.51	0.34	0.23	0.16	0.66	0.41	0.44	0.86	1.13	2.31	2.05	2.3
ncbi_101754839	FTSH8	135.79	115.7	96.47	128.51	100.63	99.55	78.98	80.08	82.73	92.29	89.68	81.86
ncbi_101754840	AAP3	28.83	37.96	34.64	30.57	36.99	50.68	23.65	29.99	28.5	34.86	42.54	38.23
ncbi_101754842	Os05g0574000	2.1	3.2	2.43	1.5	2.43	2.02	5.3	4.95	5.62	7.03	6.95	5.24
ncbi_101754843	RANBP1C	43.97	33.71	41.27	46.62	37	40.74	87.3	98.33	83.68	96.33	80.99	82.33
ncbi_101754844	UFC	2.31	2.19	3.66	1.77	4.13	4.44	0.57	1.33	1.2	0.05	0.44	0.2
ncbi_101754846	--	9.32	8.59	12.6	7.52	7.93	6.23	9.05	7.81	12.98	9.85	10.7	12.38
ncbi_101754847	Ncapd3	0.28	0.36	0.62	0.15	0.37	0.43	1.28	0.8	0.96	1.86	1.39	1.34
ncbi_101754849	--	122.86	122.59	136.4	88.68	86.09	120.37	54.76	65.96	53.93	5.79	11.55	14.33
ncbi_101754850	WDR12	4.97	4.14	7.04	11.24	9.6	8.34	16.39	15.5	10.78	12.48	11.93	12.37
ncbi_101754851	PLP3	0.37	0.14	0.82	0.27	0.94	0.35	5.84	2.88	3.9	2.73	1.67	1.34
ncbi_101754852	NPF2.11	4	2.85	4.45	14.27	33.44	22.72	12.08	8.41	9.19	11.74	7.48	6.39
ncbi_101754853	--	31.42	26.91	29.89	26.85	27.91	24.71	25.28	23.99	26.53	28.75	32.33	25.63
ncbi_101754854	GLN1-3	0.37	0.09	0.95	0.27	0.3	0.67	15.67	22.38	13.8	6.66	9.1	3.96
ncbi_101754855	Os01g0656200	4.14	2.08	5.59	0.96	1.83	1.64	9.01	4	5.2	4.62	6.52	7.36
ncbi_101754856	Ipo5	13.97	14.91	14.97	13.92	14.23	15.99	11.34	12.31	12.76	15.68	16.38	15.33
ncbi_101754858	Os03g0625900	0.58	0.69	1.38	0.96	0.97	1.09	6.05	6.97	5.7	3.32	2.82	3.06
ncbi_101754863	SPX3	0.46	0	0.24	0.08	0.12	0.08	91.83	34.29	7.69	46.86	26.52	31.57
ncbi_101754865	BI1	59.95	57.1	61.84	48.46	61.74	55.75	100.42	97.74	91.42	54.67	55.19	72.93
ncbi_101754867	CYP18-1	1.96	2.38	2.95	3.28	5.2	4.79	5.19	5.85	3.86	5.48	4.31	5.75
ncbi_101754868	--	0.1	0	0.03	0.08	0	0.15	0.08	0.12	0.19	0.32	1.38	0.1
ncbi_101754874	GLYK	28.37	29.56	36.75	16.29	21.86	19.89	24.26	27.13	31.97	64	69.44	59.62
ncbi_101754875	FIP1	170.3	129.04	113.98	301.69	141.16	143.34	74.21	76.28	51.76	50.32	67.99	44.21
ncbi_101754884	UBC20	0.12	0.46	0.75	0.75	1.76	1.73	0.2	0.05	0.17	0	0	0.06
ncbi_101754886	At5g64680	1.63	2.3	3.14	2.34	3.72	3.49	8.73	8.24	6.82	8.04	5.58	7.84
ncbi_101754888	WIP1	0	0	0.29	0.26	0.07	0.62	1.7	3.82	1.32	2.28	2.54	1.68
ncbi_101754890	UCC1	2.22	1.36	0.55	2.24	0.89	0.22	0.5	2.82	1.23	0.06	0.12	0.13
ncbi_101754894	OFP7	0.04	0.28	0.78	0	0	0.03	0.29	0.84	1.03	0.42	0.24	1.34
ncbi_101754896	GRXS5	265.72	254.46	237.45	178.25	134.03	212.1	211.1	187.9	146.66	127.97	172.48	164.51
ncbi_101754897	XI-1	6.19	7.59	6.91	6.83	7.6	6.88	5.25	6.88	9.35	7.47	7.21	4.99
ncbi_101754900	At2g33840	0.95	0.54	2.25	0.32	0.48	0.74	1.17	0.7	0.63	1.07	1.56	0.56
ncbi_101754901	RR26	7.28	9.71	9.6	7.29	7.34	9.37	10.68	12.91	15.2	9.79	6.8	9.87
ncbi_101754903	arf-1.2	12.43	8.07	12.47	8.89	8.78	8.27	20.1	12.94	12.06	12.17	17.13	11.51
ncbi_101754906	RPS27	43.33	54.88	72.07	47.73	61.12	57.67	152.5	160.79	128.12	97.34	92.76	124.08
ncbi_101754908	MTERF5	3.52	3.34	3.52	3.56	3.14	2.29	4.69	6.41	7.72	9.53	11.94	8.49
ncbi_101754909	APT2	4.6	3.67	4.28	4.59	4.54	5.45	43.85	28	29.68	23.02	16.82	21.26
ncbi_101754911	PVA12	22.21	19.21	23.09	30.35	26.73	25.41	53.72	35.92	25.07	47.76	42.2	37.61
ncbi_101754912	--	9.05	10.14	12.4	9.13	11.85	11.95	17.36	17.61	18.31	27.03	19.93	29.89
ncbi_101754913	MCC1	4.23	4.4	4.49	4.92	7.42	5.9	9.4	7.48	6.07	10.62	8.35	7.96
ncbi_101754914	ASHR2	0.78	0.3	1.26	1.48	1.14	1.16	3.7	3.18	3.2	2.61	2.64	2.1
ncbi_101754915	Os08g0188000	1.57	1.54	1.91	1.9	1.33	1.62	3.91	3.78	2.49	6.97	13.02	3.88
ncbi_101754916	--	0	0	0	1.42	0.98	2.26	0	0	0.03	0.65	3.04	0.09
ncbi_101754918	mnmE	4.57	4.77	6.74	5.1	6.76	5.12	6.52	8.91	10.68	9.72	9.32	13.66
ncbi_101754921	--	0.51	0.18	0.25	0.69	0.28	0	0.95	1.03	0.94	0	0.77	0.17
ncbi_101754923	HMGR	69.57	93.7	239.4	109.82	66.62	64.71	33.95	63.43	54.87	23.81	25.07	42.01
ncbi_101754924	CIP73	21.88	19.24	17.75	24.26	18.13	17.41	27.23	21.65	23.81	29.22	29.19	23.49
ncbi_101754925	NAC078	25.74	25.71	26.71	62.91	62.94	60.72	47.17	46.92	40.2	51.21	51.68	46.13
ncbi_101754934	--	8.16	8.57	9.55	8.05	7.9	6.94	8.33	7.82	6.7	4.06	5.09	4.95
ncbi_101754938	--	23.07	27.23	29.48	18.59	17.92	15.63	35.11	40.69	35.67	22	19.8	21.65
ncbi_101754940	ATL6	43.73	53.49	64.17	33.88	59.54	73.1	92.65	66.62	62.23	35.48	51.7	52.2
ncbi_101754942	PpSQ1_00455	0.15	0.46	0.42	0.38	0.13	0.23	0.39	1.01	1.32	0.79	1.09	0.5
ncbi_101754943	--	104.24	110.86	137.65	68.86	96.6	115.08	53.69	62.72	69.52	15.55	30.95	27.83
ncbi_101754944	HEXO2	0.22	0.41	0.58	0.07	0.09	0.07	0.28	0.45	1.11	0.31	0.45	0.82
ncbi_101754945	GOT1	16.81	16.04	27.96	37.1	37.32	35.66	9.7	16.28	10.89	3.41	5.97	3.55
ncbi_101754946	--	3.68	3.96	4.37	2.23	3.54	3.11	12.22	10.08	8.78	11.92	14.74	11.4
ncbi_101754947	BPM1	82.65	77.27	96.18	99.29	111.87	126.07	50.76	49.3	51.22	55.79	52.15	60.2
ncbi_101754948	REV3	2.45	2.24	3.02	1.82	2.05	2.03	3.13	2.84	3.18	3.56	4.09	3.06
ncbi_101754949	--	1.07	0.95	0.87	1.04	1.41	1.2	3.4	2.14	1.63	3.55	3.55	2.78
ncbi_101754962	TWN2	37.38	36.08	37.77	53.22	55.71	53.82	36.48	43.21	44.66	43.42	41.58	39.74
ncbi_101754963	HIPP39	166.77	220.39	183.99	140.03	223.6	193.39	512.11	493.27	402.54	199.78	316.03	335.2
ncbi_101754965	ALATS	33.27	36.26	39.22	30.07	32.43	31.97	35.25	39.06	35.31	53.95	52.17	43.46
ncbi_101754966	--	2.38	1.86	2.28	1.61	0.76	1.33	3.31	1.26	1.84	2.31	2.44	2.33
ncbi_101754967	DTX21	1.91	2.5	2.55	0.81	1.21	0.95	6.51	5.84	7.51	20.04	9.31	18.95
ncbi_101754969	At2g01600	184.47	177.14	140.77	158.72	136.4	141.3	108.16	123.89	120.59	94.61	96.69	89.97
ncbi_101754975	At1g64890	13.61	14.59	17.96	23.9	23.66	22.16	16.87	16.29	12.06	14.1	13.98	16.81
ncbi_101754979	At2g44860	20.39	22.41	33.39	25.16	26.92	27.07	52.56	52.11	51.53	52.2	47.33	53.59
ncbi_101754981	PLT5	10.63	11.67	9.41	10.19	11.83	10.97	42.09	23.4	22.72	27.27	19.36	37.63
ncbi_101754982	rbm46	16.95	19.71	21.63	15.39	19.93	19.84	23.1	19.02	20.78	35.75	34.48	26.77
ncbi_101754987	DCL2A	1.34	2.37	2.72	0.61	0.95	0.84	3.46	4.18	5.62	3.3	3.68	3.32
ncbi_101754989	At1g76280	0.94	1.26	2.15	1.02	1.43	0.92	2.72	3.64	3.32	3.51	3.9	3.18
ncbi_101754991	UBC34	120.42	103.83	96.92	120.2	105.6	102.47	60.62	64.88	63.23	40.63	44.02	46
ncbi_101754993	HIPP39	2.52	1.32	2.06	3.23	1.53	1.55	26.8	12.63	10.23	59.95	64.6	20.23
ncbi_101754995	CYP75A1	0.32	0.5	0.28	0.63	1.61	1.32	1.29	2.36	1.95	0.36	0.75	0.86
ncbi_101754996	SODCC.3	212.9	180.12	234.03	182.08	172.49	153.21	435.66	422.55	388.64	376.92	379.17	329.65
ncbi_101754998	--	11.49	13.17	12.66	8.68	11.42	10.35	8.02	10.78	11.9	12.85	11.78	12.41
ncbi_101754999	RIC2	104.4	87.03	88.19	111.4	104.37	92.7	73.71	73.94	73.59	63.22	67.68	65.74
ncbi_101755000	CP12-1	39.33	31.93	46.68	22.99	20.57	21.74	49.47	70.65	90.14	75.53	81.58	103.64
ncbi_101755001	TMEM230	2.36	3.51	4.04	3.95	4.6	3.6	5.14	4.78	5.5	5.27	4.68	4.18
ncbi_101755002	At5g22090	24.55	26.52	24.5	20.95	23.13	30.88	37.43	44.71	37.13	29.21	47.74	37.79
ncbi_101755004	--	14.63	17.25	16.46	13.93	15.42	14.88	8.8	11.45	11.38	15.78	14.93	12.2
ncbi_101755005	PBL19	26.54	33.97	24.5	23.75	33.12	29.31	18.25	17.43	17.74	9.78	11.51	12.72
ncbi_101755008	--	15.63	13.97	14.43	2.77	5.91	3.78	17.42	43.98	39.51	138.41	139.87	136.92
ncbi_101755009	OST1A	16.26	17.44	22.37	14.78	18.48	15.83	37.14	38.41	36.33	22.28	24.43	25.14
ncbi_101755010	CALS9	89.73	74.39	67.72	92.47	92.81	89.15	37.27	48.77	49.99	46.12	49.23	40.68
ncbi_101755017	WIT1	1.46	1.31	2.34	1.67	2.08	1.5	2.57	2.12	2.53	3.33	3.91	3.35
ncbi_101755022	At3g47570	0.26	1.78	0.93	1.14	1.61	1.6	2.44	1.81	2.92	2.54	1.36	2.25
ncbi_101755023	RMI1	0.85	0.87	1.17	0.3	0.43	0.57	2.12	1.96	2.22	3.86	2.31	2.37
ncbi_101755025	ECI2	0.74	0.74	1.54	0.95	1.01	0.5	2.67	1.06	1.32	2	2.02	2.76
ncbi_101755026	At1g54570	82.17	51.77	110.74	61.7	90.84	96.89	109.78	112.34	104.71	367.88	263.45	214.52
ncbi_101755028	TOC159	21.04	18.43	23.39	14.45	21.27	20.11	21.18	30.91	30.07	35.84	40.42	41.33
ncbi_101755029	EMC6	7.51	7.9	8.82	4.28	7.72	6.51	14.71	14.62	14.83	12.69	16.18	12.36
ncbi_101755030	--	6.23	5.67	8.35	7.99	11.69	8.34	11.55	9.53	10	14.35	13.55	13.33
ncbi_101755032	TRZ1	0.83	0.36	1.31	0.71	0.57	1.32	1.74	0.57	1.44	3.05	3.03	1.17
ncbi_101755033	THO2	20.59	19.74	23.34	17.25	18.84	18.7	17.63	18.63	21.89	27.92	26.11	20.03
ncbi_101755034	--	0	0	0.25	0	0	0	0.35	0.27	0.53	0.75	1.08	1.16
ncbi_101755035	--	6.96	8.58	10.23	3.63	5.89	4.99	6.11	14.69	16.34	27.25	32.52	34.21
ncbi_101755037	--	7.28	5.78	7.02	2.98	5.62	5.58	11.17	23.29	18.73	15.18	12.46	13
ncbi_101755040	GILP	8.31	6.45	5.17	10.11	8.22	8.31	10.08	9.15	7.83	9.26	8.95	7.07
ncbi_101755041	At3g08650	12.21	12.57	15.96	10.35	12.49	10.08	16.53	19.11	18.53	13.65	17.71	16.17
ncbi_101755044	GA2OX6	107.47	143.87	110.15	100.7	87.22	98.22	24.65	33.9	32.33	0.43	0.92	1.51
ncbi_101755050	At5g19830	2.05	3.16	4.04	1.56	1.7	2.53	5.6	4.85	5.76	8.44	11.17	8.41
ncbi_101755051	Rexo4	2.55	2.99	5.19	3.31	4.13	2.99	10.7	10.15	9.28	10.85	8.66	8.3
ncbi_101755052	TIFY6A	16.89	19.71	18.77	21.53	24.63	28.2	16.31	16.7	13.15	8.5	9.92	10.66
ncbi_101755053	--	0.54	0.31	2.23	0.86	2.07	1.87	0.06	0.02	0.1	0.2	0.83	0.29
ncbi_101755059	MAPKKK5	4.36	5.42	4.89	5.24	5.53	5.86	16.46	10.98	8.84	14.76	10.84	12.59
ncbi_101755060	PSAK	110.91	156.35	150	96.85	151.56	115.94	125.12	264.32	339.62	302.85	291.17	463.26
ncbi_101755061	UBP13	34	33.82	37.72	29.71	32.07	29.86	36.96	39.93	38.79	46.1	44.89	41.34
ncbi_101755063	At3g23880	0.58	0.4	0.4	0.57	1	0.88	1.62	2.07	0.82	2.32	1.79	2.01
ncbi_101755065	BX9	3.47	1.44	1.25	2.78	1.55	2.02	4.76	5.65	8.67	8.96	7.17	8.62
ncbi_101755066	PIP2-1	355.46	331.15	392.68	932.74	742.36	664.18	927.22	826.46	803.32	676.57	656.98	607.53
ncbi_101755068	ALG12	1.63	2.74	3.79	0.93	1.88	1.12	6.04	5.81	4.18	4.96	4.63	5.08
ncbi_101755069	Os04g0339400	8.89	3.44	0.3	3.77	1.58	2.29	0.1	1.13	0.21	0	0.42	0
ncbi_101755070	tag	0.13	0.17	0.02	0.03	0.24	0.06	0.68	0.5	1.23	0.16	0.09	0.26
ncbi_101755072	sqv-2	16.55	25.08	14.63	12.22	11.68	21.86	7.28	8.7	6.37	3.43	4.58	2.31
ncbi_101755073	At1g50590	25.79	23.1	20.36	21.5	17.27	19.39	87.26	47.57	57.29	61.33	67.96	63.88
ncbi_101755074	WAK5	42.5	108.08	52.77	13.61	18.94	30.87	8.24	34.18	32.79	5.05	10.14	15.22
ncbi_101755075	At5g42360	0.7	1.02	0.6	1.56	1.58	1.15	1.49	1.77	1.76	1.21	1.87	1.44
ncbi_101755076	PREP	4.06	7.04	3.39	9.48	9.09	12.46	0.43	0.23	0.6	0.41	0.67	0.13
ncbi_101755077	Os04g0590900	1.69	2.1	1.46	1.05	1.4	1.94	2.72	2.19	2.77	1.61	1.7	2.11
ncbi_101755078	--	1.38	0.6	3.43	0.51	0.57	0.8	1.37	1.18	1.43	2.06	2.04	1.89
ncbi_101755079	rpmB	2.59	2.79	3.88	3.23	3.31	2.8	9.17	9.52	7.82	10.89	8.45	9.11
ncbi_101755081	--	26.47	13.75	22.6	32.81	33.89	34.88	34.22	21.47	18.19	39.4	38.78	33.04
ncbi_101755082	--	1.45	2.22	3.14	0.56	2.42	2.27	6.86	4.28	3.57	6.23	7.53	5.97
ncbi_101755083	PEX10	8.99	7.87	9.66	7.3	7.99	8.32	9.64	8.67	7.25	11.56	10.04	10.16
ncbi_101755093	--	1.14	0.99	1.89	1.2	1.46	1.41	2.91	4	3.82	7.04	5.44	4.74
ncbi_101755097	--	2.38	2.99	4.41	2.4	4.4	3.07	7.33	5.7	6.12	13.2	9.38	12.75
ncbi_101755098	CRK15	0.6	0.34	0.44	0.53	0.94	1.66	0.78	1.01	0.58	0.39	0.41	1.28
ncbi_101755100	--	9.5	4.72	13.13	19.07	50.8	23.52	31.21	25.31	20.19	18.08	15.61	20.43
ncbi_101755101	ELF3-2	23.51	23.91	24.88	34.67	49.63	38.84	23.24	18.92	21.32	18.63	21.06	18.75
ncbi_101755105	At5g19025	8.08	8.8	8.35	4.56	6.6	4.97	8.9	8.05	5.97	5.46	5.43	4.32
ncbi_101755106	CG31559	11.77	9.96	12.43	11.17	9.69	10.08	5.93	8.37	9.23	5.73	8.1	7.69
ncbi_101755107	SAG39	0.59	0.87	0.68	0.17	0.46	0.29	0.57	1.15	0.67	0.04	0.46	1.24
ncbi_101755110	Os05g0271300	4.4	4.12	6.24	2.46	3.77	2.82	7.02	8.18	6.23	8.86	7.62	6.93
ncbi_101755111	At5g40670	21.11	23.72	21.23	22.61	21.42	24.25	25.21	23.88	24.35	20.63	19.71	22.75
ncbi_101755113	AO1	24.43	7.31	1.55	75.29	14.82	16.61	1.26	2.23	1.37	1.23	0.89	0.22
ncbi_101755114	SDH1	8.66	9.43	11.81	6.56	7.93	6.54	16.66	17.05	18.58	21.63	20.15	17.85
ncbi_101755115	At2g40910	0.89	0.5	1.4	1.46	1.56	1.42	3.52	3.11	2.28	2.58	1.93	3.07
ncbi_101755116	--	1	0.77	0	3.04	1.17	2.97	0.86	1.5	0	0.16	2.38	0
ncbi_101755118	--	1.59	2.16	1.06	5.06	2.98	2.64	0.47	0.66	1.09	0.43	0.25	0.14
ncbi_101755121	STL2	1.38	2.1	3.76	1.52	3.83	2.33	8.15	7.73	7.71	6.15	5.58	6.04
ncbi_101755123	--	6.44	5.6	9.26	6.51	7.33	7.01	13.76	11.12	10.3	8.64	9.56	8.89
ncbi_101755127	OsI_33147	8.05	7.66	9.8	7.33	10.79	8.54	28.41	21.11	21.51	16.72	18.29	19.67
ncbi_101755128	DRP1E	8.61	8.52	8.26	12.23	12.97	12.79	5.34	6.56	7.36	14.67	13.03	11.84
ncbi_101755129	RMR6	8.09	5.48	14.38	7.77	19.22	9.81	13.96	16.58	15.49	36.46	25.75	36.4
ncbi_101755130	SKI3	3.32	4.13	5.57	1.93	3.19	3.24	6.96	6.79	7.37	7.31	7.23	6.61
ncbi_101755131	NAP1;1	11.32	10.63	16.84	11.05	14.04	14.14	38.81	38.75	32.61	19.44	16.02	17.02
ncbi_101755132	GIP1	30.37	29.28	31.21	36.09	39.58	37.13	42.26	43.58	39.61	41.7	39.32	41.27
ncbi_101755134	--	4.74	2.55	3.23	4.52	5.33	2.45	25.06	22.85	21.98	47.19	31.42	21.46
ncbi_101755135	At4g10320	11.89	13.91	15.84	9.92	10.99	11.34	24.53	28.69	27.04	21.12	22.41	17.83
ncbi_101755141	--	84.3	83	66.95	33.07	51.84	46.56	101.62	115.54	98.19	182.99	153.16	166.81
ncbi_101755142	RGA4	6.94	6.13	9.99	9.26	13.16	11.65	12.21	11.79	12.22	8.32	8.75	8.23
ncbi_101755144	Os03g0108600	16.45	15.22	18.3	10.74	14.65	12.16	7.57	13.66	15.28	22.02	24.61	25.51
ncbi_101755150	LEA14-A	0.34	0.45	2.63	0	0.28	0.15	0	0.29	0	1.03	2.38	2.12
ncbi_101755151	P	3.11	3.43	5.77	6.15	6.55	3.69	17.64	8.47	6.54	3.77	4.66	5.55
ncbi_101755153	RAD51D	6.37	6.27	7.59	4.07	3.76	5.42	8.42	6.43	8.33	10.49	11.62	9.03
ncbi_101755158	--	4.31	3.42	4.29	3.85	4.27	3.15	7.92	6.64	5.98	8.84	7.51	7.26
ncbi_101755160	ATL40	4.19	1.94	4.94	8.71	12.75	10.89	2.09	1.85	1.57	3.21	2.51	3.09
ncbi_101755161	--	4.39	3.95	5.12	5.63	6.55	6.03	18.62	16.67	14.99	15.75	16.97	16.91
ncbi_101755162	PAP27	35.01	19.34	20.29	58.19	38.65	21.46	226.71	72.76	31.66	49.21	35.74	25.86
ncbi_101755163	--	10.06	8.35	7.96	5.62	10.35	8.93	20.29	18.36	13.76	35.41	19.49	25.49
ncbi_101755164	STRAP	9.35	6.66	12.11	5.46	5.84	6.1	15.02	13.02	16.17	15.75	16.4	16.31
ncbi_101755166	Os01g0926700	14.39	30.4	43.17	13.39	14.41	16.46	16.1	23.32	38.57	2.85	2.85	2.93
ncbi_101755168	RCOM_1506700	6.93	4.38	7.17	3.34	4.46	4.19	8.45	8	8.87	12.74	12.11	12.18
ncbi_101755169	--	4.69	4.27	6.73	4.65	7.72	5.13	4.91	4.74	7.34	7.9	6.55	6.39
ncbi_101755170	--	3.38	3.48	5.9	3.4	5.59	2.99	7.14	7.39	6.85	8.21	8.49	6.93
ncbi_101755173	2023-08-06	4.43	4.5	5.42	4.6	5.28	3.82	4.3	5.36	6.77	5.68	5.85	5.94
ncbi_101755177	--	3.68	4.15	5.99	2.96	4.99	3.4	7.17	6.36	6.31	10.26	9.72	7.14
ncbi_101755178	--	0.71	1.03	0.47	0.56	0.95	0.46	1.5	0.57	0.83	0.7	0.65	0.47
ncbi_101755180	ANT2	374.77	380.52	418.26	536.29	601.77	596.23	390.49	421.56	390.52	215.69	224.01	290.26
ncbi_101755181	ATL46	3.76	5.01	4.54	4.17	3.92	4.2	3.18	5.17	5.2	1.55	2.08	1.97
ncbi_101755184	--	382.38	384.25	431.87	378.03	398.18	390.16	212.17	221.47	228.39	155.01	173.8	182.19
ncbi_101755188	FHA2	6.13	4.34	8.35	6.42	8.32	6.72	13.23	13	11.94	14.72	13.12	14.45
ncbi_101755192	XA21	9.86	9.8	5.74	2.39	7.25	2.05	7.9	9.41	7.16	2.02	1.48	3.21
ncbi_101755194	APP2	11.96	10.75	11.26	6.85	11.24	10.11	12.3	12.06	14.84	23.44	20.81	22.67
ncbi_101755195	BIO2	19.87	20.38	24.95	13.45	18.61	15.79	36.09	32.54	41.45	33.1	27.66	36.55
ncbi_101755197	CYP71C4	1.43	1.43	2.15	1.34	1.79	1.64	2.69	3.74	3.31	3.78	3.36	4.44
ncbi_101755198	--	1.39	1.53	2.13	1.36	1.56	1.9	1.81	3.04	2.58	3.49	3.37	2.72
ncbi_101755199	Y-2	140.45	160.74	151.81	72.04	39.1	57.7	39.09	54.3	65.78	14.42	58.12	23.06
ncbi_101755200	--	11.6	12.56	10.54	10.14	10.98	9.1	13.94	11.69	11.8	13.13	12.19	10.71
ncbi_101755201	ERF060	198.13	209.87	219.77	247.15	356.11	303.58	374.15	281.76	251.73	276.95	334.54	315.66
ncbi_101755202	CSLH1	76.99	29.74	20.36	63.1	27.87	31.73	68.77	42.81	47.37	91.47	81.72	114.1
ncbi_101755203	NRPC1	3.79	4.03	5.34	2.77	2.87	3	6.61	6.73	7.49	8.53	7.42	7.1
ncbi_101755204	MSR1	0.91	1.09	1.8	0.2	0.55	0.59	3.34	4.39	6.76	1.04	1.37	1.65
ncbi_101755206	BXL6	3.34	2.96	4.64	11.57	12.18	13.27	20.37	9.56	8.43	18.96	20.44	15.65
ncbi_101755207	21D7	20.67	21.87	21.99	21.52	25.45	22.48	24.6	24.71	25.41	21.23	22.69	24.72
ncbi_101755210	--	14.08	15.78	23.39	10.59	12.6	14.35	31.12	28.63	26.24	27.61	26.71	24.69
ncbi_101755211	--	1.01	0.48	2.18	2.03	1.43	1.88	1.14	0.59	0.66	2.11	2.94	1.66
ncbi_101755212	CHR28	19.78	21.61	16.42	20.99	21.74	19.7	10.51	11.79	13.36	8.04	9.49	7.56
ncbi_101755215	CPK28	8.44	8.67	10.16	9.32	12.25	9.83	14.52	12.63	14.38	14.18	12.77	13.25
ncbi_101755216	RPS16A	25.79	26.95	37.08	42.87	45.42	45.24	108.18	126.81	97	70.43	65.71	84.95
ncbi_101755217	CYP90A4	9.66	8.47	11.31	8.64	8.91	9.66	9.5	18.37	19.6	13.39	13.33	14.32
ncbi_101755221	WAK2	4.84	5.13	2.16	1.35	2.34	3.24	4.47	4.26	2.95	1.31	1.22	2.62
ncbi_101755228	At3g28410	3.32	2.74	4.1	2.09	3.9	3.1	8.01	7.7	7.45	9.61	10.86	9.87
ncbi_101755230	At4g06598	3.9	3.41	4.32	6.91	9.17	6.68	10.34	6.59	7	16.74	13.44	16.59
ncbi_101755231	Tsr1	8.06	8.11	11.2	8.49	9.16	9.93	21.73	23.74	25.23	21.7	18.75	19.2
ncbi_101755232	RPL10	207.2	110.86	224.54	16.9	7.88	10.27	182.19	177.84	149.67	155.57	213.96	158.38
ncbi_101755233	CMT2	3.35	3.48	3.53	3.55	4.59	5.13	2.94	3.09	3.23	2.69	2.1	1.89
ncbi_101755234	PLD1	1.06	0.23	0.93	0.36	0.33	0.27	0.59	0.66	0.65	0.91	1.37	1.02
ncbi_101755244	EBP1	23.35	25.06	33	19.53	21.47	22.98	54.07	59.71	49.06	51.57	42.32	42.09
ncbi_101755247	DTX56	0.09	0.03	0	0.08	0.15	0.13	1.26	1.31	1.52	3.92	1.53	2.79
ncbi_101755248	AUXI1	48.39	51.01	46.4	41.4	45.15	46.46	23.39	26.12	32.58	23.18	22.91	21.18
ncbi_101755250	RBM28	2.54	1.9	4.28	2.24	2.33	2.8	9.36	10.21	9.92	7.06	7.26	6.01
ncbi_101755251	--	1.65	1.7	1.5	1.7	2.06	2.51	3.64	4.99	4.07	3.53	2.7	3.67
ncbi_101755252	UKL3	10.6	11.02	15.34	31.24	43.54	42.82	14.05	12.89	13.27	10.63	10.95	12.14
ncbi_101755253	PARV12.8	11.01	11.85	18.32	11.68	13.29	13.44	17.15	15.32	13.4	14	12.95	15.83
ncbi_101755255	PGM1	155.93	160.93	149.58	120.13	134.4	128.59	250.83	241.77	222.47	312.49	249.59	280.2
ncbi_101755257	EIN2	2.06	2.31	4.05	2.64	3.93	5.08	3.14	2.92	3.8	5.3	5.6	4.3
ncbi_101755259	--	2.64	1.93	4.27	4.07	4.91	4.44	5.15	5.37	3.77	6.44	6.47	7.67
ncbi_101755261	At2g46620	52.04	50.39	50.93	43.84	33.84	42	55.74	39.61	35.73	39.67	47.32	44.02
ncbi_101755265	At1g28600	0.37	0.28	0.11	0.52	0.28	0.19	6.4	1	0.2	0.15	0.17	0.19
ncbi_101755267	NTL9	2.67	2.07	4.24	1.58	2.35	2.06	5.93	7.62	6.62	6.96	7.52	6.48
ncbi_101755268	Os06g0130600	1.78	1.68	2.68	2.32	3.02	2.7	4.48	4.03	5.35	6.17	6.22	7.06
ncbi_101755270	TKT2	7.78	7.62	11.8	5.24	6.96	5.83	19.85	14.28	14.09	19.81	19.94	16.15
ncbi_101755271	NPF8.3	23.15	23.26	30.55	29.03	33.18	28.51	22.93	28.65	26.9	14.48	16.44	14.64
ncbi_101755272	2MMP	87.28	120.94	86.08	52.27	65.2	99.68	138.18	210.25	178.7	17.68	31.55	47.44
ncbi_101755273	CAX2	0.47	0.38	0.17	0.17	0.42	0.28	0.57	0.52	1.04	0.61	1.56	0.51
ncbi_101755277	OsI_11177	14.23	13.8	19.3	9.95	13.43	12.13	32.2	28.45	26.31	26.16	24.81	28.94
ncbi_101755278	RR21	46.8	56.86	57.45	57.65	73.33	64.8	27.41	29.74	28.71	29.56	26.75	27.94
ncbi_101755279	ERF3	18.01	11.44	17.59	13.51	12.28	10.04	18.98	18.88	14.55	7.86	8.67	9.33
ncbi_101755281	--	1	0.79	1.64	0.69	1.1	1.02	0.97	0.93	1.64	1.63	2.08	1.71
ncbi_101755286	PCMP-E4	0.41	0.26	0.3	0.17	0.26	0.18	0.97	0.87	0.45	1.17	0.82	1.25
ncbi_101755289	--	1.29	1.29	2.05	1.85	1.15	1.24	2.75	3.22	2.12	1.96	3.35	3.8
ncbi_101755296	CSC1	109.77	79.97	75.18	231.42	201.63	191.91	26.54	27.35	32.32	13.4	12.59	13.19
ncbi_101755297	BETAA-AD	15.75	13.46	17.17	13.14	14.62	14.8	29.88	27.27	26.48	26.61	25.85	27.89
ncbi_101755298	--	0.24	0.16	0.31	0.32	0.6	0.47	3.1	1.21	1.03	2.32	1.76	1.49
ncbi_101755299	FLA11	0.32	0.23	2	0.35	0.67	0.23	0.67	1.03	1.29	0.61	0.29	0.81
ncbi_101755300	BAM1	59.7	44.08	25.05	59.7	39.19	51.36	38.19	29.96	21.86	9.7	10.89	11.56
ncbi_101755302	--	2.45	1.42	2.73	2.16	4.11	4.18	4.33	2.64	3.04	5.49	6.01	6.26
ncbi_101755303	EXO70A3	16.19	40.24	38.13	8.62	14.95	23.33	18.05	20.82	19.61	5.95	11.1	9.78
ncbi_101755304	NPC2	0.52	0.46	0.58	0.4	0.33	0.21	1.21	2.33	1.9	6.55	5.31	3.37
ncbi_101755305	Dnajb1	4.99	5.5	6.23	4.13	5.85	5.08	7.72	7.1	5.42	6.22	6.9	5.86
ncbi_101755308	--	2.14	1.51	2.44	0.83	1	1.59	6.59	7.02	5.12	5.64	4.9	5.26
ncbi_101755311	Isy1	2	1.01	3.51	2.87	3.06	2.21	4.55	3.81	3.19	6.56	5.33	6.75
ncbi_101755312	UGNT1	49.88	59.06	46.01	46.98	48.55	53.85	30.98	29.12	26.13	17.23	16.7	22.74
ncbi_101755317	--	1.79	0.86	1.78	1.28	1.95	1.79	2.69	3.97	2.94	2.31	2.73	3.33
ncbi_101755318	FLZ6	23.45	14.3	26.32	23.51	43.52	23.98	78.35	49.66	62.06	66.58	49.81	71.74
ncbi_101755321	--	32.08	29.97	39.06	23.53	28.01	26.03	75.82	66.41	69.18	130.78	119.65	88.92
ncbi_101755326	UCH2	7.51	7.05	8.01	8.95	11.54	10.41	17.24	12.17	10.55	15.2	12.78	14.72
ncbi_101755332	--	0.01	0	0	1.06	0	0	1.19	0	0	0.13	0	0.68
ncbi_101755333		20.2	19.29	17.18	13.96	16.81	16.25	8.64	10.88	11.41	13.09	13.46	9.76
ncbi_101755334	ATI1	6.4	5.52	7.91	7.23	8.43	8.52	15.21	14.8	15.26	15.29	15.09	16.9
ncbi_101755335	--	0	0.45	1.07	0.17	0.17	0.18	2.01	0.92	0.97	1.29	0.67	2.32
ncbi_101755337	AGPS1	1.32	0.87	1.02	0.48	0.28	0.36	13.34	6.27	8.8	5.91	6.56	3.35
ncbi_101755338	Cebpz	2.29	2.84	4.28	2.2	2.42	3.07	7.97	10.14	8.67	8.71	10.27	6.45
ncbi_101755339	RLPH2	10	8.9	12.47	6.01	8.72	6.81	18.53	19.89	18.96	28.72	30.94	28.04
ncbi_101755340	CPSF73-II	1.56	2.15	2.53	2.07	2.16	2.28	5.79	4.57	4.4	5.25	5.21	5.73
ncbi_101755341	At1g10780	0.16	0.4	0.5	0.13	0.26	0.14	0.35	1.01	0.84	0.35	0.23	0.19
ncbi_101755343	--	13.01	9.79	6.11	9.27	5.16	8.21	2.92	3.45	2.89	1.52	1.28	1.28
ncbi_101755345	At4g27700	10.22	10.81	10.18	10.54	15.02	14.57	9.27	13.19	27.81	6.76	8.79	13.53
ncbi_101755347	SIT2	3.32	3.28	4.02	2.01	2.33	2.12	13.52	9.31	7.61	2.36	5.76	4.05
ncbi_101755348	--	1.72	1.35	2.74	1.3	2.26	1.8	3.69	4.09	3.53	4.37	4.69	6.51
ncbi_101755349	--	1.25	0.75	1.36	0.8	0.6	0.64	0.87	1.04	1.01	1.14	1.51	1.48
ncbi_101755350	DDB_G0274487	11.1	8.02	6.71	11.62	9.91	9.37	11.39	8.29	9.25	14.38	13.06	16.52
ncbi_101755351	XYLA	25.81	23.29	47.04	13.77	17.36	16.22	58.87	42.47	39.47	79.38	85.03	59.54
ncbi_101755352	PNC1	0.1	0.06	0.27	0.04	0.3	0.18	1.7	2.92	0.77	0.05	0.29	0.26
ncbi_101755353	ADT2	5.28	5	6.84	6.83	6.43	4.79	11.19	9.94	9.18	5.56	5.62	7.37
ncbi_101755363	NUDT23	4.25	3.73	6.73	8.07	10.73	10.72	15.01	12.3	9.73	15.96	14.82	16.5
ncbi_101755364	At3g50520	0.38	0.66	0.42	13.89	0.84	4.05	0.09	0.05	0.09	0.14	0.07	0.1
ncbi_101755366	--	1.86	3.44	6.16	4.21	5.77	4.08	7.6	7.74	9.03	14.59	22.53	9.01
ncbi_101755367	SEU	14.31	15.43	16.66	10.88	17.85	15.7	17.7	20.2	20.26	24.18	23.71	24.54
ncbi_101755368	NPF5.10	2.28	2.39	3.65	2.45	5.5	3.66	5.86	6.8	6.15	2.12	1.58	4.19
ncbi_101755369	RGA5	0	0	0	0	0	0	0	0	0	0.28	2.2	0
ncbi_101755370	ARP8	20.97	23.9	26.9	14.12	17.48	16.34	28.63	30.96	35.01	58.5	53.16	46.87
ncbi_101755371	SRP68	19.72	17.55	20.46	17.09	19.54	18.45	32.93	31.06	30.83	34.95	31.82	31.12
ncbi_101755372	CFM9	2.91	1.72	1.8	3.84	3.05	2.76	3.38	4.16	3	3.12	2.45	2.3
ncbi_101755376	--	37.42	24.41	27.19	88.67	51.01	54.22	35.72	24.79	21.09	45.32	39.83	54.72
ncbi_101755378	NSL1	28.91	35.69	36.95	10.3	12.35	17.6	38.2	54.4	63.23	7.25	15.81	14.67
ncbi_101755383	RBOHB	1.15	1.49	0.21	1.79	0.38	0.53	0	0	0	0	0.02	0.02
ncbi_101755384	GID1	154.72	98.02	150.42	191.43	225.96	181.63	231.66	185.57	177.3	118.76	143.61	151.97
ncbi_101755385	LSM5	10.64	11.55	12.35	7.04	11.46	9.88	33.53	29.08	25.75	20.12	20.92	27.53
ncbi_101755388	--	2.57	1.14	0	0	0	0	0	0	0	0	0.13	0
ncbi_101755389	ARPC4	3.97	2.92	5.25	3.42	5.6	5.33	9.9	9.36	11.18	10.24	11.69	11.91
ncbi_101755392	RAB11C	34.41	36.56	34.41	44.88	47.55	42.77	20.77	24.54	20.82	10.54	13.73	15.87
ncbi_101755393	PLT5	19.33	16.65	22.89	11.79	10.5	15.43	9.43	18.05	18.37	52.17	52.89	54.92
ncbi_101755394	MFP1-1	0.82	0.79	1.16	0.57	0.61	0.62	1.53	3.76	3.3	2.57	2.7	2.35
ncbi_101755395	AGO12	6.54	6.18	7.09	13.11	14.54	18.23	4.49	5.75	4.2	7.59	6.64	7.77
ncbi_101755397	--	22.04	21.79	29.32	28.3	29.39	23.27	42.75	31.52	31.21	30.54	31.89	33.26
ncbi_101755400	--	2.02	2.02	2.03	2.03	2.53	1.92	4.45	6.15	4.77	12.56	10.62	10.81
ncbi_101755402	mettl5	1.88	1.97	2.74	1.29	1.39	1.31	8.41	8.99	5.5	5.78	5.28	6.09
ncbi_101755404	erlin2-b	26	30.17	29.76	18.46	21.22	17.47	43.31	39.03	34.4	32.98	31.76	30.57
ncbi_101755406	PAS1	22.12	20.97	22.71	20.37	21.28	21.49	26.46	24.05	25.87	23.55	24.09	20.98
ncbi_101755407	--	23.42	38.45	14	25.42	12.06	30.46	7.57	10.68	7.35	1.56	5.07	3.13
ncbi_101755409	Os07g0689300	11.89	12.8	11.53	8.86	9.95	9.6	6.46	6.11	8.75	10.85	11.51	9.76
ncbi_101755410	DAPA	9.04	9.14	14.15	11.67	13.17	12.14	33.55	30.58	27.83	22.58	21.98	27.22
ncbi_101755411	DNAJC8	31.83	29.08	36.54	26.08	32.16	27.31	32.56	30.39	32.53	34.35	32.12	31.37
ncbi_101755412	ROD1	2.5	2.12	4.46	8.27	11.06	10.31	1.06	1.17	0.99	1.65	1.3	1.53
ncbi_101755414	--	31.39	18.18	20.46	21.57	7.28	14.01	9.21	12.69	14.27	15.22	18.16	21.11
ncbi_101755415	At5g43745	5.84	6.75	6.71	5.14	6.26	5.69	2.77	4.76	5.08	7.8	8.38	7.6
ncbi_101755422	sti1	0.95	0.43	0.64	0.63	0.94	0.76	1.43	1.21	0.61	0.67	0.46	0.15
ncbi_101755426	--	52.77	59	63.49	39.72	57.25	48.74	26.53	42.96	47.39	90.71	93.05	110.38
ncbi_101755433	--	31.42	33.49	45.77	12.53	21.79	20.08	36.6	36.3	38.54	110.06	86.23	87.56
ncbi_101755435	RTEL1	0.52	0.55	0.81	0.48	0.55	0.46	0.82	0.58	0.82	0.94	0.96	0.72
ncbi_101755436	--	1.23	0.58	0.79	1.29	1.92	0.94	2.39	2.02	1.23	1.41	1.17	0.99
ncbi_101755437	KMS1	18.62	16.43	18.99	21.83	25.31	22.93	40.4	25.77	18	32.84	33.1	27.07
ncbi_101755438	At1g14600	0.28	0.36	0.83	0.25	0.25	0.19	1.07	0.9	1.06	0.63	0.66	0.84
ncbi_101755439	At1g51965	0.26	0.5	0.76	0.41	0.64	0.26	1.17	1.38	1.15	1.91	2.05	1.52
ncbi_101755441	BIG1	9.27	8.13	8.08	11.87	14.73	12.8	5.19	6.39	5.46	4.22	4.64	3.84
ncbi_101755442	CCR1	112.49	182.36	173.36	33.15	38.73	31.65	15.68	39.45	51.95	11.02	14.37	15.07
ncbi_101755443	SCL3	3.9	2.56	2.03	2.96	2.86	2.33	4.08	2.87	4.4	4.38	4.39	4.56
ncbi_101755446	rnf10	31.43	27.77	31.81	21.54	25.61	24.55	55.98	42.64	38.18	54.46	56.97	48.08
ncbi_101755448	FLU	1.12	0.95	0.99	0.8	1.82	1.27	3.41	3.8	3.61	3.75	3.69	3.04
ncbi_101755449	At2g24330	40.74	33.07	33.15	41.06	43.88	41.67	36.14	34.37	33.35	31.96	37.42	26.34
ncbi_101755450	At5g51380	1.57	1.07	2.19	2.09	2.74	2.32	3.22	5.29	4.87	5.35	6.52	6.69
ncbi_101755451	NRS/ER	47.24	73.21	63.84	44.13	57.27	48.86	31.75	52.46	51.9	21.11	27.49	32.93
ncbi_101755452	--	130.87	61.05	322.98	141.87	97.73	125.46	255.64	106.75	74.08	75.51	150.87	103.48
ncbi_101755453	--	74.48	47.8	45.75	161.84	79.27	81.77	228.61	90.52	58.14	76.24	78.64	60.61
ncbi_101755454	ALDH2B4	0.43	0.55	0.41	0.64	0.53	0.37	2.29	1.1	1.31	0.41	0.27	0.22
ncbi_101755455	At3g51280	2.94	2.17	0.59	0.34	0.69	0.46	0.29	0.4	0.26	0.14	0.15	0.65
ncbi_101755459	HMGIY2	1.35	1.29	1.52	2.13	2.48	2.33	2.13	2.05	2.95	4.19	6.13	6.82
ncbi_101755460	RLK7	2.47	6.28	2.88	1.76	3.84	3.07	1.1	2.11	3.88	0.85	1.24	1.97
ncbi_101755463	--	9.12	10.83	13.44	8.68	10.33	9.79	19.32	21.83	14.92	21.53	20.12	16.31
ncbi_101755465	BHLH82	3.97	2.86	4.67	3.84	5.94	5.38	7.31	7.22	7.02	5.29	5.28	7.09
ncbi_101755467	NHO1	17.46	8.06	11.97	21.4	32.17	22.14	87.77	38.61	30.9	100.4	66.36	76.93
ncbi_101755469	HEN1	6.24	7.04	9.69	4.07	5.47	5.09	6.58	11.16	11.67	8.94	9.49	9.98
ncbi_101755473	At3g52300	1.56	0.94	1.63	0.26	0.93	1.3	3.3	3.92	5.64	3.13	2.72	5.76
ncbi_101755475	Os04g0338000	3.86	2.31	0.87	1.09	0.36	1.3	0.63	1.2	1.75	0.75	0.39	0.73
ncbi_101755476	CG9588	4.37	4.84	4.77	4.24	4.13	4	9.85	9.29	8.36	13.51	10.68	10.02
ncbi_101755477	MADS26	0.8	0.38	0.87	0.22	0.22	0.12	22.44	16.56	22.92	1.95	1.09	0.8
ncbi_101755479	WIP2	0.6	0.52	0.61	0.81	0.65	0.83	1.01	1	0.72	0.46	0.63	0.75
ncbi_101755480	FTA	3.9	4.44	4.77	3.9	5.44	3.93	8.46	8.31	7.15	9.52	8.73	10.75
ncbi_101755482	RABH1B	63.58	62.28	68.17	85	90.57	73.94	66.53	77	78.44	55.46	51.71	59.97
ncbi_101755483	PSRP2	10.09	9.33	10.52	8.87	10.65	9.84	2.4	2.97	5.39	10.97	13.08	15.25
ncbi_101755484	--	3.49	2.26	3.17	1.12	1.87	1.29	2.31	1.8	2.28	3.4	4.75	4.86
ncbi_101755485	OsI_26380	15.36	12.48	10.75	52.3	57.8	55.76	7.9	6.39	5.12	5.83	5.79	6.69
ncbi_101755486	PEX6	15.71	15.13	16.02	12.96	15.98	14.94	17.19	16.44	17.87	16.94	20.51	15.01
ncbi_101755487	NRPD2	1.71	2.17	2.76	1.53	1.77	2.13	4.87	6.62	7.47	6	4.66	5.78
ncbi_101755488	UP3	7.82	10.31	10.38	7.74	9.59	8.86	17.45	17.54	16.04	14.57	15.62	14.94
ncbi_101755500	ACR12	15.23	12.45	24.76	3.87	4.65	5.87	16.3	18.76	28.46	19.07	10.74	33.01
ncbi_101755502	CSN5	7.25	5.67	9.28	9.91	11.98	10.56	20.34	19.62	15.63	16.48	16.21	17.17
ncbi_101755503	PUX11	21.6	23.95	26.97	17.82	22.61	23.36	29.12	29.68	30.06	29.64	29.04	29.92
ncbi_101755504	CRK2	163.27	141.49	123.47	137.1	73.63	135.18	40.55	24.56	18.47	21.51	24.05	20.66
ncbi_101755505	CCB1	61.31	58.33	63.76	34.45	41.64	40.05	52.66	77.53	73.11	139.46	129.85	111.06
ncbi_101755507	RGA5	0.92	1.64	2.32	1.1	1.72	1.24	0.87	1.25	1.19	0.53	0.25	0.65
ncbi_101755508	NAC075	32.79	26.42	18.14	33.16	15.98	11.81	20.19	22.82	20.57	21.38	20.42	12.82
ncbi_101755509	CKL2	42.57	42.01	47.76	36.17	46.25	42.17	62.99	52.81	59.62	52.16	57.38	57.4
ncbi_101755510	--	0.02	2.6	6.01	4.04	5.57	5.26	6.14	6.63	7.74	9.36	12.6	6.71
ncbi_101755512	rplT	1.32	1.11	2.72	1.45	1.83	1.27	9.42	8.92	6.24	8.8	6.82	5.09
ncbi_101755514	MYR1	5.48	6.33	3.54	1.59	2.08	2.24	3.24	3.86	6.66	6.7	5.19	5.04
ncbi_101755516	ACT1	21.58	16.65	21.83	38.13	40.28	35.41	27.93	29.56	32.2	31.1	26.42	23.47
ncbi_101755517	MADS4	0.4	0.28	0.3	0.39	0.6	0.62	2.02	0.95	0.59	0.22	0.33	0.36
ncbi_101755521	ORRM6	11.7	15.55	16.84	13.61	12.29	11.29	10.2	9.99	9.3	8.91	10.28	8.08
ncbi_101755522	--	0.99	1.29	1.15	0.41	0.51	0.51	2.79	3.93	4.21	2.51	3.86	2.94
ncbi_101755524	sec61a	167.25	144.96	124.77	166.81	168.08	165.53	95.49	107.43	93.92	71.06	75.65	82.45
ncbi_101755526	Cwf19l2	15.98	14.47	18.66	15.63	18.02	17.12	16.53	17.71	16.59	14.81	15.19	15.5
ncbi_101755530	--	106.85	105.85	68.89	99.8	140.64	140.9	434.97	311.06	177.68	102.36	151.54	157.86
ncbi_101755532	RBM39	34.85	37.15	43.82	34.54	36.13	34.58	70.21	52.81	56.33	53.15	47.79	48.06
ncbi_101755533	APC5	1.52	2.18	2.9	1	1.26	1.66	2.81	3.25	3.04	3.93	2.65	2.48
ncbi_101755534	FUC95A	21.49	18.12	26.41	13.18	13.23	15.15	30.66	27.16	30.42	33.22	27.65	29.89
ncbi_101755537	--	13.73	10.59	16.74	13.73	19.57	17.86	26.81	19.51	17.35	16.43	15.44	19.69
ncbi_101755539	--	37.86	33.67	38.74	27.77	30.93	26.51	58.48	56.15	59.39	122.08	106.95	93.87
ncbi_101755540	--	7.6	10.11	5.67	9.29	5.09	8.75	3.17	4.36	4.02	1.38	1.98	2.06
ncbi_101755541	OsI_33008	25.74	24.95	30.02	21.95	24.8	24.79	28.99	30.79	28.59	23.46	26.68	24.91
ncbi_101755542	MAP65-6	0.27	0.46	0.69	0.72	0.56	0.41	0.71	1.12	1.16	1.06	0.92	1.04
ncbi_101755543	AIG2LD	12.24	8.74	9.35	9.71	8.35	8.51	23.27	18.85	17.92	19.69	18.77	18.17
ncbi_101755544	HOX12	0.13	0.09	0.28	0.25	0.04	0.15	0.77	0.19	0.08	0.75	0.71	0.69
ncbi_101755545	HEMB	160.27	192.83	180.9	123.56	161.23	154.64	181.12	175.92	176.93	195.11	184.6	211.8
ncbi_101755547	At2g02148	2.47	2.08	3.3	1.11	1.72	1.1	4.08	3.98	5.16	4.72	5.5	4.37
ncbi_101755552	ADCS	9.79	6.94	6.12	11.21	13.43	11.89	6.2	4.73	4.71	7.87	6.87	6.26
ncbi_101755554	KPHMT1	0.49	0.93	1.73	0.88	0.99	1.46	1.39	1.08	1.63	1.64	1.76	1.28
ncbi_101755555	--	19.96	15.89	16.9	49.9	49.38	49.54	46.22	22.51	11.07	7.22	6.03	5.8
ncbi_101755558	FLAD1	49.67	49.93	55.4	51.41	56.43	54.37	21.94	24.34	25.4	24.09	25.17	26.35
ncbi_101755561	POPTR_0012s05040g	3.84	1.64	2.33	1.25	0.81	1.03	19.31	11.92	6.23	3.82	5.45	1.63
ncbi_101755562	NAC075	7.87	6.33	11.08	8.8	9.04	9.47	6.55	11.73	12.42	9.13	10.13	14.54
ncbi_101755563	ESR1	0	0	25.65	0.05	0.16	0	0.08	0	0	2.02	22.45	0.28
ncbi_101755568	--	8.06	4.37	6.05	10.43	10.32	11	22.66	17.86	19.3	8.59	8.97	14.11
ncbi_101755570	COI1A	17.53	16.44	26.31	15.61	28.86	22.68	69.1	68.87	73.77	65.74	67.11	77.31
ncbi_101755571	SCL1	11.55	9.79	8.74	45.09	38.99	37.94	5.24	6.87	5.33	7.31	8.26	5.04
ncbi_101755572	RPT6A	40.32	33.7	45.2	44.44	46.37	42.77	72.06	62.76	67.38	77.23	71.88	77.79
ncbi_101755573	retm	32.61	30.17	39.31	29.67	37.41	35.97	89.32	55.61	53.93	35.13	34.19	32.04
ncbi_101755575	SKI2	6.9	8.66	10.12	5.63	7.22	6.62	10.41	9.3	10.63	9.43	8.55	8.59
ncbi_101755576	spast	2.04	1.91	4.8	1.97	3.93	1.75	4.75	4.23	4.13	6.45	5.44	6.23
ncbi_101755578	--	56.57	50.85	52.49	58.9	66.43	58.48	51.45	48.85	46.88	33.77	34.94	37.2
ncbi_101755579	Os02g0460200	10.69	14.2	16.96	10.05	12.19	13.71	24.7	20.33	22.5	12.29	12.66	15.7
ncbi_101755582	At1g01540	3.42	4.34	7.12	5.03	14.06	8.98	2.27	2.98	5.05	1.19	1.44	2.33
ncbi_101755585	--	119.11	118.37	68.34	116.78	77.64	80.76	78.87	84.36	71.02	31.86	45.15	39.88
ncbi_101755586	--	6.28	8.47	10.08	3.32	6.09	5.06	6.82	7.84	8.61	11.63	12.72	12.49
ncbi_101755587	FAD4	0.76	0.1	0.46	0.37	0.22	0.16	5.25	3.76	3.48	17.97	15.81	13.57
ncbi_101755591	DSP2	2.7	3.13	3	4.95	4.46	5.05	5.54	5.03	3.49	3.94	4.48	4.18
ncbi_101755592	MTERF4	2.64	2.35	2.66	2.57	2.5	3.1	6.62	6.69	5.05	7.81	7.56	7.62
ncbi_101755593	ALF4	0.87	1.05	1.84	0.28	0.46	0.48	2.46	2.41	2.57	2.16	3.02	1.93
ncbi_101755594	TMN11	37.28	31.92	31.06	42.44	39.04	40.35	30.75	35.74	32.43	23.58	24.77	25.42
ncbi_101755596	CNB1	11.19	12.39	15.31	7.96	9.02	10.06	24.52	23	26.14	26.67	24.71	28.1
ncbi_101755600	--	3.47	3.01	3.85	1.39	2.43	2.23	4.36	3.65	4.23	3.78	4.29	3.67
ncbi_101755603	ABCG6	0.57	0.32	0.63	0.2	0.3	0.46	1.06	1.05	1.19	0.65	0.47	0.85
ncbi_101755607	ERI2	0.12	0	0.34	0	0.24	0.32	0.65	0.65	0.42	1.15	3.23	0.91
ncbi_101755610	DSP1	5.18	4.76	7.36	5.17	5.35	5.59	8.47	10.17	10.94	9.01	8.47	10.27
ncbi_101755612	ASR3	1.56	1.86	3.45	1.92	2.44	2.67	3.35	2.78	2.72	1.94	2.31	2.42
ncbi_101755613	TPP7	154.48	165.53	260.34	174.06	87.55	123.29	74.65	146.87	189.88	33.05	68.77	59.07
ncbi_101755614	METTL18	224.16	257.23	137.95	134.26	80.6	128.14	75.81	75.67	85.5	38.98	46.53	42.32
ncbi_101755616	Dml	5.1	4.87	7.54	2.22	2.98	2.86	18.6	15.38	11.69	27.71	25.66	23
ncbi_101755618	Rpp25l	2.6	2.09	4.17	4.21	4.59	4.79	12.21	14.2	9.89	7.29	7.33	9.2
ncbi_101755619	GDH2	70.87	66.9	87.4	229.19	197.31	168.91	35.89	22.47	19.38	15.54	16.24	12.3
ncbi_101755620	At4g07390	15.03	13.38	19.56	13.72	14.15	13.71	39.62	31.61	30.34	35.97	33.18	30.35
ncbi_101755621	FAX4	0.84	0.91	1.33	0.64	0.29	0.67	4.12	2.09	2.67	1.8	1.99	2.55
ncbi_101755622	At5g10620	3.13	4.09	4.69	0.87	1.43	1.15	1.09	2.35	1.88	2.49	2.45	2.49
ncbi_101755623	AGD5	163.39	154.92	165.3	145.64	167.35	166.29	89.89	95.37	108.06	83.87	85.01	84.38
ncbi_101755625	OFUT38	0.56	0.26	0.53	0.15	0.23	0.09	1.61	2.74	2.03	3.67	5.06	2.06
ncbi_101755626	RA3	0.47	1.4	0.87	2	2.4	2.39	0.26	0.9	0.15	0.31	0.21	0.13
ncbi_101755627	BASS1	0.09	0.51	0.31	0.25	0.5	0.15	0.48	1.01	1.35	1.23	0.86	0.95
ncbi_101755628	ARAD1	1.68	1.24	2.78	2.5	2.91	2.11	6.35	4.56	4.05	7.03	5.39	5.15
ncbi_101755633	TPS23	1.94	1.48	1.37	2.08	2.15	1.21	0.3	0.03	0.03	0.03	0	0.12
ncbi_101755635	At1g03560	0.64	0.62	0.57	0.66	0.3	0.62	0.72	0.78	0.68	0.98	1.09	0.58
ncbi_101755637	--	1.27	0.98	1.64	0.15	1.21	0.16	3.48	4.83	4.26	3.32	3.91	3.95
ncbi_101755638	PDIL5-4	13.04	12.51	14.43	9.52	12.92	11.88	18.6	16.46	17.52	14.41	13.94	14.11
ncbi_101755640	OsI_18219	33.35	34.31	36.03	30	34.81	35.47	36.35	30.95	37.11	39.42	37.98	34.67
ncbi_101755641	MIP2	3.65	3.45	4.27	2.86	4.25	3.45	4.07	4.51	4.51	6.2	5.88	4.78
ncbi_101755642	ATS3B	2.23	2.41	3.21	4.1	2.51	3.02	5.7	8.16	6.87	6.94	12.7	9.66
ncbi_101755645	LEA14-A	945.95	1233.81	1201.58	1175.33	1194.74	1172.4	406.49	529.4	544.85	115.71	213.81	199.27
ncbi_101755647	ATJ10	118.58	103.75	119.89	109.49	119.17	107.02	61.76	67.35	70.86	56.47	51.49	58.59
ncbi_101755654	--	0.72	0.67	0.68	0.17	0.26	0.42	0.62	1.93	1.21	1.98	3.14	2.92
ncbi_101755656	psuG	5.37	4.44	7.08	3.27	4.34	4.98	11.32	9.35	10.06	11.2	11.43	8.43
ncbi_101755657	FDX3	136.1	43.17	31.26	205.61	53.66	60.14	116.74	109.64	72.45	87.11	81.18	64.28
ncbi_101755658	NDPK2	5.06	3.74	3.93	3.97	4.25	3.4	7.63	9.35	8.36	6.18	6.07	6.24
ncbi_101755660	RIBF	7.21	6.55	9.17	4.86	5.64	5.47	8.8	10.08	9.4	17.54	17.6	17.43
ncbi_101755661	DAR1	41.2	58.93	63.49	47.35	49.28	56.56	79.49	62.29	62.01	74.11	66.93	78.8
ncbi_101755662	LHA1	6.78	7.38	7.25	4.21	6.13	5.87	5.14	8.91	10.68	9.55	11.49	10.73
ncbi_101755664	--	2.54	1.97	2.45	1.94	3.53	3.89	2.59	1.19	2.89	1.39	1.94	1.07
ncbi_101755667	HOX32	1.43	1.64	5.92	1.57	2.24	1.4	3.49	9.51	9.72	3.69	3.84	4.17
ncbi_101755670	ERCC1	4.52	3.1	5.06	4.53	5.04	4.57	10.49	7.83	6.69	7.7	6.56	6.51
ncbi_101755671	HBS1L	3.91	4.15	5.19	3.59	3.93	3.64	6.19	7.11	8.03	6.98	6.56	6.43
ncbi_101755674	SLP1	7.84	8.12	9.42	2.51	4.48	3.94	10	10.96	13.13	27.83	28.19	24.99
ncbi_101755677	DMAS1-A	8.66	7.65	14.08	6.49	7.9	11.48	16.05	9.98	13.87	25.58	18.37	27.7
ncbi_101755678	--	4.1	5.08	7.46	5	4.37	3.91	17.09	19.06	17.06	18.15	14.08	16.02
ncbi_101755679	UNE10	13.68	17.85	22.23	7.69	9.45	10.66	35.25	18.93	17.04	38.7	37.05	35.84
ncbi_101755681	--	80.25	107.85	123.63	59.97	43.51	83.8	68.43	103.42	101.82	19.93	30.29	29.49
ncbi_101755683	RTNLB16	14.76	14.66	14.47	16.06	14.96	16.57	16.87	14.19	13.89	9.49	10.67	8.22
ncbi_101755684	TS2	30.07	40.21	24.65	25.16	22.43	36.33	13.33	13.88	13.66	7.92	13.43	21.71
ncbi_101755685	LPXC1	0.6	0.75	0.79	0.54	0.36	1.21	1.66	1.98	1.2	1.38	1.15	1.7
ncbi_101755686	REV1	23.56	18.1	13.82	28.73	24.83	22.6	8.77	6.77	5.33	4.65	5.74	4.79
ncbi_101755687	--	15.48	9.95	20.23	19.87	24.35	21.18	7.16	6.8	5.53	10.13	9.08	9.43
ncbi_101755695	--	10.17	8.65	11.07	13.47	18.16	14.04	9.58	10.71	11.81	11.14	10.71	10.38
ncbi_101755696	ATJ20	7.21	5.95	6.9	8.13	15.73	16.66	11.98	19.79	16.16	38.17	32.1	45.35
ncbi_101755698	Os01g0131800	2.63	2.21	5.7	6.01	6.26	6.47	9.4	9.21	8.73	8.56	11.34	8.99
ncbi_101755702	CAF2	4.29	3.87	7.55	3.02	4.22	3.46	7.9	11.24	13.62	13.4	13.36	12.38
ncbi_101755703	ufd1	378.75	473.4	244.08	220.97	89.68	245.74	157.81	204.21	208.59	108.57	185.44	104.49
ncbi_101755704	TOM7-1	18.93	15.52	21.87	20.62	25.88	27.03	50.67	59.06	46.08	33.66	31.98	34.95
ncbi_101755705	AATP1	58.31	53.93	46.71	126.84	107.31	85.33	73.33	66.98	55.08	31.17	29.83	28.44
ncbi_101755708	TAF4B	26.23	24.6	27.67	20.39	26.63	27.35	26.64	24.85	26.86	28.27	28.2	27.88
ncbi_101755709	AVT1C	2.01	1.77	5.68	2.59	2.33	3.22	2.21	2.78	3.28	2.88	1.97	3.68
ncbi_101755710	RGA1	6.4	4.37	2.93	1.65	2.41	2.84	1.04	1.42	1.94	2.91	1.16	1.96
ncbi_101755711	--	23.5	44.98	35.21	10.19	15.16	18.4	14.9	20.34	19.9	6.58	12.77	10.52
ncbi_101755713	PRMT5	3.43	3.72	6.01	1.98	2.47	2.41	10.44	11.21	11.83	5.35	5.72	5.56
ncbi_101755714	SUV2	0.75	1.06	1.03	0.45	0.55	0.58	4.09	4.87	3.98	4.36	3.36	3.57
ncbi_101755717	BASS3	14.44	3.73	2.57	11.99	13.06	9.92	2.07	2.17	1.22	1.35	0.89	2.07
ncbi_101755722	--	56.19	48.21	52.82	54.6	54.21	50.14	86.42	87.83	72.58	101.93	97.72	99.07
ncbi_101755726	LIF2	26.41	28.16	35.96	28.02	37.32	31.92	60.38	49.9	55.16	62.33	57.63	55.84
ncbi_101755727	ATL16	1.35	0.79	0.52	0.64	1.41	0.96	1.58	1.07	1.34	0.81	0.61	0.91
ncbi_101755728	SPBC2A9.03	58.95	63.74	63.59	62.13	73.55	69.01	44.62	47.47	49.97	58.33	57.8	58.8
ncbi_101755729	OOP	21.29	21.39	22	18.99	21.52	21.31	26.79	27.87	29.97	32.68	26.6	30.14
ncbi_101755731	CLC-F	14.19	13.67	17.81	11.44	15.96	13.97	17.57	16.7	17.12	20.9	20.14	19.15
ncbi_101755733	IP5P12	2.12	1.63	1.94	1.83	2.57	2.75	1.98	2.03	2.13	2.13	1.76	2.51
ncbi_101755734	--	2.41	0.69	1.23	0.99	0.4	1.18	0.36	0.49	0.22	0.25	0.15	0.08
ncbi_101755738	RLP6	7.44	3.04	2.25	5.54	2.39	4.63	2.26	2.52	2.02	4.05	11.82	1.87
ncbi_101755739	--	1.73	1.93	1.68	1.45	1.54	1.61	3	1.96	2.55	1.41	2.16	1.58
ncbi_101755742	Gtf3c5	1.99	1.71	2.84	1	1.71	1.27	1.6	2.06	2.34	2.29	3.49	2.25
ncbi_101755743	THO3	3.36	3.88	6.34	2.49	3.99	3.49	10.6	11.89	8.39	8.38	6.99	8.22
ncbi_101755744	FOLD1	11.55	10.26	14.32	7.49	10.53	10.05	16.07	16.73	15.93	18.17	10.61	16.56
ncbi_101755745	SBE1	124.94	101.97	142.7	39.74	61.8	61.52	426.86	310.05	375.69	216.38	191.53	236.36
ncbi_101755746	At4g25835	5.01	3.42	3.11	16.85	11.56	10.19	2.6	2.85	2.24	0.89	1.67	1.53
ncbi_101755747	At5g35370	6	5.44	9.09	4.45	2.84	3.77	1.32	1.32	2.4	0.3	0.51	0.38
ncbi_101755750	EIF4B	12.96	11.11	17.97	16.18	17.34	14.62	19.84	17.59	17.65	20.02	22.67	20.5
ncbi_101755751	VP22-1	5.21	5.94	4.49	6.45	7.57	6.39	6.21	6.74	7.7	6.99	7.06	7.93
ncbi_101755753	CCDC124	36.81	34.67	29.84	28.16	23.33	25.17	25.99	29.11	22.46	17.94	23.11	19.94
ncbi_101755754	--	1.5	1.64	3.73	0.17	0.94	0.38	0.13	0.86	0.99	0	0	0.09
ncbi_101755755	PDIL2-1	42.79	38.5	44.48	53.65	55.06	43.06	49.92	47.58	45.66	33.93	31.47	36.71
ncbi_101755757	SRP	167.8	115.89	94.78	215.23	122.47	122.38	227.09	174.16	174.16	226.86	209.22	202.69
ncbi_101755758	Os07g0682400	2.77	4.11	6.7	2.39	5.72	4.55	5.43	10.56	11.62	8.87	11.75	11.53
ncbi_101755759	BLOS1	0.93	1.1	1.3	0.56	0.99	1.1	4.02	2.3	2.43	2.79	2.63	1.71
ncbi_101755760	At3g11320	1.04	0.41	0.28	1.17	0.75	0.45	0.48	0.37	0.44	0.44	0.56	0.24
ncbi_101755774	--	0.83	4.33	6.9	4.69	6.52	3.48	1.44	3.2	6.57	12.76	22.04	2.17
ncbi_101755776	NAC030	2.04	1.1	1.29	1.42	3.61	2.16	3.35	7.38	4.8	0.96	2.1	0.98
ncbi_101755777	GDPD4	2.38	1.35	3	1.82	2.41	1.73	5.81	5.23	4.61	6.93	6.67	4.62
ncbi_101755778	--	7.5	6.89	10.98	5.4	7.25	5.63	16.83	12.63	12.85	11.84	14.12	11.63
ncbi_101755780	VIL1	54.93	55.05	47.08	44.72	41.46	45.04	17.12	31.33	30.48	16.57	24.35	17.29
ncbi_101755781	NAAT1	4.16	3.44	3.6	5.98	8.93	9.41	75.91	28.71	20.04	27.06	17.85	14.42
ncbi_101755782	ECT4	20.3	20.27	26.06	19.45	25.72	22.86	22.12	21.19	23.67	29.35	26.03	26.73
ncbi_101755785	--	8.97	5.53	12.29	7.5	8.93	7.14	16.07	19.82	20.43	29.68	34.33	34.7
ncbi_101755787	--	15.98	13.53	15.49	18.44	24.9	20.68	20.4	15.34	17.45	19.48	20.35	17.29
ncbi_101755788	Os03g0210200	35.14	34.21	217.58	2.15	8.17	2.38	0.42	0.11	0.12	0.13	0.91	0
ncbi_101755792	Dcaf11	25.19	25.03	23.36	14.46	18.77	16.52	21.4	20.51	22.56	43.24	40.2	40.83
ncbi_101755798	NPF5.7	0.03	0.06	1.93	0.21	0.73	0.32	0.61	1.79	0.9	0.5	0.62	0.26
ncbi_101755799	CLT2	4.9	3.76	7.03	6.62	6.51	6.47	18.75	11.73	9.38	15.74	15.61	11.36
ncbi_101755800	MED9	16.96	15.69	17.75	10.4	15.23	14.88	27.39	27.92	23.89	20.52	22.77	24.47
ncbi_101755801	PHYC	3.88	4.17	5.7	2.86	3.96	5.06	6.97	6.22	6.55	7.77	8.89	8.46
ncbi_101755803	RZ1C	3.31	3.74	4.75	3.49	5.76	4.59	8.33	8.25	7.23	9.92	8.85	7.41
ncbi_101755809	--	1.13	0.57	2.47	0.16	0.33	0.23	0.97	1.34	3.26	1.5	2.54	2.01
ncbi_101755810	At2g13100	6.79	6.04	5.48	10.35	12.97	11.22	8.48	9.28	6.34	5	5.67	4.87
ncbi_101755811	ANS	2.62	3.86	4.13	3.16	2.76	2.54	8.86	10.35	7.67	9.41	9.83	9.54
ncbi_101755812	--	1.47	0.73	5.18	1.67	2.9	0.93	3.18	1.18	1.98	0.81	1.75	2.44
ncbi_101755813	NLP3	0.66	0.67	0.61	0.07	0.37	0.31	0.9	1.24	1.76	0.36	0.77	0.53
ncbi_101755814	RRA3	1.51	1.89	3.12	1.29	2.05	1.71	7.3	7.17	6.27	5.95	4.72	6.77
ncbi_101755817	KCR1	0.49	0.18	0.48	0.17	0.14	0.32	0.37	0.29	0.34	0.71	1.05	1.03
ncbi_101755820	GRXC8	21.17	18.16	25.88	12.8	14.43	14.4	52.16	41.31	36.84	32.57	37.19	38.97
ncbi_101755821	PLA2-II	0.75	1.34	2.44	0.66	0.15	0.38	1.47	1.3	0.57	0.32	1.92	0.69
ncbi_101755822	OS9	26.58	30.74	34.67	21.47	29.93	25.39	56.33	53.88	48.73	44.67	42.91	38.17
ncbi_101755823	At2g27500	39.62	52.75	56.16	28.62	33.58	31.65	34.29	55.33	62.17	16.22	19.69	23.67
ncbi_101755825	--	138.77	55.29	28.53	132.13	17.31	20.52	8.44	8.17	11.25	10.58	14.34	11.57
ncbi_101755828	--	5.14	5.82	6.06	2.11	2.36	4.59	5.43	8.05	9.5	29.63	25.11	28.35
ncbi_101755829	SBT1.2	4.71	4.61	7.17	4.96	4.21	4.27	3.28	9.62	13.46	1.74	2.28	4.22
ncbi_101755831	--	0.28	0.2	1.08	1.52	1.54	1.36	1.56	1.94	1.45	2.28	0.67	1.21
ncbi_101755838	DMS3	1.92	2.07	3.42	2.12	2.04	1.94	3.6	3.36	3.07	4.74	3.74	4.71
ncbi_101755844	At3g47570	0	0.64	0.64	0.34	0.42	0.45	1.74	0.73	1.35	1.44	0.71	1.54
ncbi_101755846	ECI2	1.05	0.32	1.01	0.41	0.33	0.22	2.52	1.74	1.98	1.94	2.09	2.35
ncbi_101755847	DHN1	1.41	0	3.04	0.07	0	0.29	3.35	1.01	0.31	2.71	2.41	1.08
ncbi_101755848	--	18.32	20.45	19.21	14.05	15.96	15.91	12.63	14.21	17.75	21.99	23.14	15.89
ncbi_101755849	PMAT1	137.03	53.96	26.08	118.08	32.99	43.96	114.6	74.34	67.7	188.94	154.98	143.64
ncbi_101755850	PXM16	30.84	34.34	26.6	88.12	71.83	65.64	25.16	26.65	29.68	15.31	12.76	16.17
ncbi_101755851	At1g18250	0.11	0.06	0.08	0.57	1.02	0.88	0	0.23	0.39	0.33	0.1	0.7
ncbi_101755852	CFBP	272.19	287.3	290.83	135.34	193.34	172.05	223.04	239.96	243.09	425.31	404.82	451.91
ncbi_101755853	CAMRLK	5.11	4.82	7.98	5.09	10.15	8.07	15.41	12.19	10.25	10.19	11.1	12.8
ncbi_101755854	--	0.11	0	0	0.09	0.06	0.05	1.02	0.2	0.46	0.65	0.41	1.07
ncbi_101755858	--	80.81	101.39	118.76	70.69	108.11	137.47	77.12	66.28	61.86	66	64.51	77.37
ncbi_101755859	--	46.05	37.46	51.25	45.69	53.37	43.11	117.17	89.01	81.26	69.78	77.17	74.91
ncbi_101755860	ASR3	3.43	2.8	3.64	2.14	2.72	2.08	4.8	5.03	5.1	7.48	5.5	5.04
ncbi_101755865	ROPGAP3	4.38	3.03	4.49	6.65	7.91	7.1	7.74	7.04	3.84	10.98	9.79	10.94
ncbi_101755867	PUB5	88.26	104.02	66.45	57.67	49.52	67.8	28.69	47.64	55.96	44.21	57.33	45.86
ncbi_101755870	PPT2	295.42	322.41	233.7	218.24	305.51	254.42	230.95	396.03	435.99	356.45	319.04	357.73
ncbi_101755872	FAB1C	5.79	6.15	5.91	4.98	10.18	7.62	8.25	7.81	6.38	11.24	8.88	8.96
ncbi_101755874	GAD	52.74	51.8	92.48	43.72	49.69	50.04	50.42	58.74	76.08	53.3	51.49	44.76
ncbi_101755875	RIBA1	1.57	1.75	3.73	1.31	2.25	2.23	6.8	7.27	7.27	11.96	11.53	7.54
ncbi_101755877	PP7	25.58	22.51	26.53	36.6	35.54	34.87	27.18	28.14	25.6	37.8	36.88	36.99
ncbi_101755882	ERD4	273.6	335.48	452.46	286.61	406.23	332.48	92.83	132.34	157.51	48.76	65.46	58.2
ncbi_101755884	At3g47110	0.84	0.77	0.6	0.83	0.93	0.69	3.08	1.29	1.15	1.15	0.91	0.8
ncbi_101755885	PIP2-6	4.61	2.73	2.63	5.37	4.14	9.53	9.27	9.24	6.82	15.13	8.27	13.99
ncbi_101755886	--	3.3	0.51	13.77	0.97	0.33	0.34	6.54	6.17	5.22	24.23	37.62	11.85
ncbi_101755887	GATA26	3.89	5.06	5.11	5.4	9.1	8.67	3.79	5	5.63	5.53	6.08	6.87
ncbi_101755890	YPTM1	1.59	1.66	2.52	0.9	1.05	0.95	1.98	1.11	1.98	1.75	2.15	1
ncbi_101755894	ADK2	39.73	34.33	44.37	21.44	21.3	22	93.13	63.74	62.2	51.92	53.58	56.16
ncbi_101755895	UPF1	42.29	36.48	38.21	42.87	43.69	38.81	33.92	35.57	38.88	39.57	40.01	36.8
ncbi_101755896	OsI_025469	94.84	68.64	79.21	181.64	178.81	153.98	185.29	123.55	101.77	144.55	140.36	142.66
ncbi_101755898	Os07g0614500	108.07	100.23	140.65	132.75	136.09	137.18	191.32	206.69	181.42	153.97	143.52	191.77
ncbi_101755907	SMXL3	0.22	0.13	0.23	0.32	0.59	0.28	0.72	0.99	0.36	1.63	1.63	0.81
ncbi_101755911	rngtt	37.73	32.11	40.96	31.46	33.72	32.32	43.48	40.27	40.62	49.95	49.9	43.08
ncbi_101755912	SD25	72.39	77.59	35.46	48.08	30.86	58.16	76.46	70.42	65.16	31.09	29.2	25.79
ncbi_101755915	--	7.08	7.03	7.84	7.31	10.25	9.03	15.08	15.55	14.97	13.46	13.78	14.44
ncbi_101755919	RBOHF	26.79	26.21	21.55	29.26	25.61	25.05	5.83	10.18	10.77	3.88	4.04	3.62
ncbi_101755926	CHLD	44.43	43.97	43.27	30.74	41.99	37.8	17.24	27.87	38.75	47.91	50.15	54.85
ncbi_101755927	TBP2	7.31	4.58	3.35	15.11	11	12.14	8.43	7.59	6.35	3.77	3.96	5.3
ncbi_101755928	CKA4	23.93	19.59	22.68	17.95	24.13	21.38	11.64	13.59	12.82	9.39	10.46	11.7
ncbi_101755931	RLK902	11.34	6.66	9.31	18.67	14.14	14.6	6.52	5.56	3.41	3.1	4.96	3.99
ncbi_101755932	Os03g0700700	11.88	10.68	25.25	1.31	5.86	0.83	0.24	0.47	0.26	0.31	0.38	0.27
ncbi_101755934	FZL	16.34	18.54	18.99	9.35	12.47	13.92	12.31	15.76	21.19	35.93	35.24	32.85
ncbi_101755938	wdr70	11.64	11.22	15.24	6.56	8.8	7.51	16.49	15.9	15	18.35	17.83	14.96
ncbi_101755940	PETE	492.82	576.33	461.4	340.08	443.06	364.62	343.69	711.86	769.7	1008.95	1003.08	1280.34
ncbi_101755942	--	21.74	20.04	24.94	31.3	19.97	18.15	75.36	39.43	32.62	116.75	118.12	84.69
ncbi_101755945	MORF5	2.43	2.43	3.41	3.76	3.57	3.49	11.8	11.81	11.36	11.81	10.6	11.87
ncbi_101755946	MOS2	23.67	25.57	20.28	23.78	20.17	22.82	18.51	22.78	20.75	15.74	16.85	14.73
ncbi_101755947	--	9.9	4.07	3.33	9.93	4.37	4.43	9.11	5.16	4.67	8.79	8.1	5.46
ncbi_101755948	ARF19	14.28	11.93	12.46	15.22	18.3	17.47	6.69	5.99	7.2	5.95	5.86	4.05
ncbi_101755955	Os06g0327300	6.28	7.32	6.88	7.03	8.77	7.78	17.1	16	16.05	8.73	10.56	9.94
ncbi_101755959	RPM1	2.15	1.52	2.31	1.85	4.28	3.09	2.81	2.57	2.09	4.63	5.36	3.34
ncbi_101755961	PIPC	41.03	40.84	38.86	52.89	56.86	55.51	36.59	36.89	40.14	37.71	43.48	36.76
ncbi_101755966	NET4B	1040.34	1236.55	897.77	901.59	728.71	631.14	368.1	624.77	793.92	67.81	188.01	131.86
ncbi_101755967	Eaf	15.81	14.85	18.97	10.91	14.28	13.27	18.76	22.27	21.87	22.32	21.76	25.04
ncbi_101755968	CRK6	22.4	34.56	21.32	18.52	19.21	24.49	7.81	15.89	15.03	2.53	1.84	4.09
ncbi_101755969	--	1.57	4.3	2.17	0.84	0.75	2.14	0	0.1	0.14	0	0.64	0.16
ncbi_101755970	H2B.5	18.49	13.61	18.49	33.51	37.35	30.03	38.48	24.4	20	35.99	31.85	32.91
ncbi_101755971	SPAC31G5.19	5.09	5.11	4.15	3.9	4.36	4.07	2.28	3.41	3.37	4.59	3.99	3.33
ncbi_101755974	rnf-5	14.03	18.14	17.58	10.79	14.42	14.37	42.63	35.85	41.43	23.51	39	37.7
ncbi_101755975	DIVARICATA	1.94	1.98	1.73	2.33	2.33	2.43	5.12	4.17	3.74	7.5	6.18	5.81
ncbi_101755976	DCLRE1B	6.26	6.57	10.44	13.45	13.22	10.87	5.68	7.57	5.82	7.72	8.23	8.44
ncbi_101755977	BT3	12.11	14.59	14.87	13.56	28.46	27.43	18.59	17.99	22.61	42.13	37.19	33.4
ncbi_101755978	YBEY	3.13	3.17	4.29	1.56	1.7	1.43	4.77	7.07	6.76	7.84	7.59	6.07
ncbi_101755980	SEC14L1	53.53	69.8	84.6	35.21	48.1	43.35	60.61	59.77	64.63	58.75	62.68	79.5
ncbi_101755982	CML31	431.78	351.44	350.16	199.73	335.35	497.68	674.37	540.38	388.74	310.78	488.9	367.83
ncbi_101755983	At3g26922	17.97	16.36	21.93	18.09	20.75	19.56	29.34	23.58	18.13	17.85	20.56	21.5
ncbi_101755984	--	0.8	2.7	5.1	1.7	1.82	0	20.57	4.5	5.92	6.12	9.49	8.36
ncbi_101755989	Os04g0590900	13.73	22.98	28.33	9.34	22.05	24.1	44.4	35.67	27.26	22.09	30.56	29.79
ncbi_101755992	GSVIVT00026920001	11.05	12.16	8.82	13.83	7.73	8.92	1.34	2.77	3.69	2.19	1.78	1.13
ncbi_101755994	GPT2	16.08	12.9	14.11	16.51	16.01	15.19	99.05	46.11	37.03	47.45	49.21	35.43
ncbi_101755996	Dcun1d2	1.38	2.1	2.51	1.01	0.7	0.96	2.37	2.94	2.55	1.88	1.88	2.27
ncbi_101755997	DBR1	0.65	0.63	1.16	0.44	0.9	0.65	1.2	1.02	0.75	0.73	1.06	1.2
ncbi_101755998	--	0.87	1.07	1.85	0.53	0.78	0.67	2.97	3.31	3.14	6.24	6.42	4.86
ncbi_101755999	GNT2	7.93	9.41	11.78	7.48	12.01	8.65	9.34	9.63	8.41	5.43	5.6	5
ncbi_101756003	RPL7B	9.43	8.36	10.38	13.36	11.51	13.23	25.13	29.01	21.59	19.46	17.3	22.95
ncbi_101756004	CLPD1	2406.49	2544.86	1698.05	2529.76	1906.67	2345.75	784.68	862.5	816.9	335.02	404.07	291.58
ncbi_101756008	Smt1-1	8.45	9.47	14.38	3.78	5.67	5.4	12.67	16.21	21.53	23.07	20.22	21.27
ncbi_101756009	CDKF-2	35.67	22.55	21.32	34.35	18.82	29.39	17.81	12.42	8.53	12.96	13.75	11.26
ncbi_101756010	--	84.29	70.81	72.43	55.14	72.08	65.37	37.89	61.22	70.86	138.44	122.48	139.57
ncbi_101756014	At1g67480	0.14	0.12	0.18	1.29	1.31	1.8	0.28	0.24	0.21	0.23	0.28	0.11
ncbi_101756017	NOLC1	5.56	5.55	7.76	4.16	5.63	4.82	22.03	20.76	22.06	18.26	17.4	14.49
ncbi_101756020	CBP31	79.55	69.98	107.15	84.89	101.32	91.25	143.29	99.18	103.42	83.24	84.82	87.14
ncbi_101756021	ACS1	9.83	16.05	26.59	8.52	7.87	6.6	14.68	16.41	21.11	6.06	7.09	6.74
ncbi_101756022	PAP8	59.07	58.39	68.08	31.56	46.58	35.78	37.94	52.21	50.88	106.17	84.11	99.94
ncbi_101756023	--	8.45	4.58	8.64	10.3	17.7	18.92	8.07	7.63	5.02	8.38	6.32	9.07
ncbi_101756024	Os04g0629500	9.11	9.65	16.21	16.25	18.66	17.7	15.15	17.36	16.84	16.71	15.24	17.04
ncbi_101756025	Os01g0871200	9.72	10.65	15.6	8.9	15.12	10.51	29.25	24.9	23.66	24.8	25.88	26.84
ncbi_101756026	PDK	271.04	257.38	272.34	155.47	181.13	192.69	169.86	289.86	383.31	503.78	503.36	532.97
ncbi_101756027	BGLU26	0	0.08	1.61	0.08	0	0	0.03	0	0.02	0.16	0.26	0.03
ncbi_101756029	GLDH1	1.76	1.68	2.16	0.55	1.14	1.42	5.55	5.07	5.23	4.75	5.77	4.53
ncbi_101756034	At1g06710	0.26	0.5	0.85	0.16	0.21	0.21	2.12	2.7	2.4	2.6	2.13	1.61
ncbi_101756038	--	5.01	1.25	0.02	0.17	0.07	0.13	0.16	0.13	0.08	0.21	0.05	0.2
ncbi_101756039	LTP3	122.33	139.6	126.87	58.83	102.08	79.68	461.68	224.64	182.9	130.12	128.5	133.92
ncbi_101756043	BT1	15.04	12.2	13.25	34.17	30.15	21.9	8	12.19	13.54	9.41	10.21	9.39
ncbi_101756044	--	38.42	74.23	32.12	10.67	14.51	11.46	43.35	56.96	66.26	4.6	1.06	10.76
ncbi_101756046	WRKY22	9.5	8.99	9.73	22.27	34.15	33.67	7.65	3.96	3.3	1.98	3.82	2.35
ncbi_101756050	FKBP20-1	14.53	12.28	19.78	11.41	14.84	13.92	29.75	23.5	22.62	24.79	23.11	21.25
ncbi_101756055	APE1L	1.35	1.5	2.91	0.94	1.87	1.41	1.74	3.5	3.58	3.78	3.12	3.23
ncbi_101756056	TBL2	7.34	5.16	7.85	5.49	6.74	7.76	16.94	14.2	16.6	19.74	19.12	16.98
ncbi_101756057	MAN3	0.9	0.07	2.69	0.34	0.26	0.27	9.84	1.39	0.54	2.9	5.32	2.43
ncbi_101756059	--	4.42	8.09	8.2	3.15	3.26	1.81	0.64	3.13	3.65	0.35	0.43	0.27
ncbi_101756060	TIM44-2	5.37	4.6	6.07	4.78	7.02	6.61	8.32	9.1	9.68	7.76	7.41	6.81
ncbi_101756061	ytfP	6.36	5.9	6.22	3.78	6.03	3.87	4.85	7.04	7.17	8.92	10.49	9.38
ncbi_101756063	Os03g0728800	4.43	4.83	6.47	5.01	6.65	6.03	13.23	14.16	13.9	13.07	14.37	10.62
ncbi_101756065	FDC1	3.83	3.02	3.34	4.33	4.88	2.37	4.62	7.12	6.51	11.58	10.54	13.77
ncbi_101756067	--	5.31	4.49	6.49	3.96	5.02	3.76	9.49	11.29	8.84	13.08	11.25	11.6
ncbi_101756068	rplY	1.21	0.95	1.61	1	1.42	1.05	9.94	10.42	6.99	6.51	4.93	5.16
ncbi_101756069	fray2	31.94	25.13	26.32	50.78	47.73	50.73	25.64	23.73	26.93	24.83	28.3	25.64
ncbi_101756070	Os02g0642300	17.37	15.64	18.5	17.03	16	14.7	30.39	27.99	26.06	14.78	14.99	17.71
ncbi_101756074	--	7.1	5.56	10.54	5.29	11.39	7.97	18.27	19.5	16.2	29.03	25.98	26.32
ncbi_101756075	CPN60B2	26.81	22.9	34.28	18.13	20.87	17.21	83.83	142.34	102.69	175.43	165.13	91.15
ncbi_101756076	KIN5A	0.74	0.92	1.13	0.46	0.55	0.71	0.64	0.59	0.81	1.19	0.99	0.91
ncbi_101756078	LDL3	4.2	4.07	4.92	4.51	5.68	5.45	5.58	6.17	6.3	9.5	9.19	7.6
ncbi_101756079	UGT84A13	2.48	0.93	0.25	2.97	0.86	1.93	1.17	1.44	1.2	1.15	0.58	0.93
ncbi_101756080	NPF5.9	7.18	7.03	9.35	4.75	6.06	6.89	14.74	21.6	22.54	41.61	35.8	33.13
ncbi_101756082	At3g49150	16.58	19.3	21.25	7.99	10.59	12.67	9.53	12.96	13.83	5.73	6.71	5.05
ncbi_101756083	VPA0103	23.52	19.91	25.99	21.55	24.98	24.86	22.5	27.43	27.58	19.49	18.44	24.12
ncbi_101756085	--	0.58	0.17	0.73	0.07	0.07	0.32	0.86	0.88	0.8	1.7	1.03	1.57
ncbi_101756088	iqw1	14.19	12.76	15.28	12.74	15.99	14.72	14.92	16.27	16.69	19.16	19.36	15.67
ncbi_101756095	ABCG25	76.66	60.69	43.73	100.56	93.06	87.7	36.91	40.6	48.22	36.18	34.06	35.4
ncbi_101756096	--	3.79	4.29	6.28	2.95	3.06	3.89	13.7	11.76	10.5	7.72	6.95	7.72
ncbi_101756098	RGA5	0.6	0.62	0.75	1.04	1.5	1.3	0.59	0.59	0.44	1.01	0.88	0.67
ncbi_101756100	ERF118	174.35	159.07	146.74	204.88	248.9	225.06	110.23	140.09	137.6	88.6	98.01	132.58
ncbi_101756104	COX15	1.06	1.46	2.83	0.73	0.76	1.05	3.5	5.74	5.03	4.63	4.64	3.62
ncbi_101756105	trmB	0.15	0.12	0.53	0.06	0.3	0.22	0.25	0.96	1.31	0.79	1.13	1.03
ncbi_101756106	WRKY28	0.61	0.48	0.73	0.94	2.26	1.49	1.53	1.17	1.64	0.97	0.81	0.81
ncbi_101756107	At1g14650	8.63	7.18	10.65	7.43	10	7.88	17.8	17.79	16.54	18.5	15.87	18.68
ncbi_101756108	PMIR1	2.56	1.75	1.95	5.73	5.95	4.04	5.4	4.23	2.77	3.3	4.26	3.3
ncbi_101756109	HXK6	19.4	25.28	21.68	10.44	11.9	13.02	15.6	22.25	40.31	24.75	23.06	27.24
ncbi_101756112	AIRP2	12.57	8.47	8.28	18.26	18.15	15.41	30.03	15.77	14.99	35.41	30.3	29.96
ncbi_101756113	ARP6	2.51	1.74	3.46	1.38	1.54	2.39	3.87	3.91	2.51	5.01	4.04	2.95
ncbi_101756114	AAE1	6.97	10.64	5.71	10.53	10.37	10.25	11.98	10.98	8.09	13.23	9.43	10.56
ncbi_101756116	--	13.52	12.28	18.71	8.09	11.45	9.36	26.2	25.2	24.23	24.02	27.13	24.24
ncbi_101756117	At4g24290	50.24	36.14	26.27	61.23	49.72	59.35	17.06	18.48	15.4	5.37	6.97	7.99
ncbi_101756119	E2FA	3.82	3.52	4.81	7.86	9.6	7.93	3.65	3.55	2.8	2.73	3.22	3.26
ncbi_101756121	GOT1	4.31	4.1	6.43	4.63	4.67	3.25	8.92	9.14	8.02	8.12	9.8	10.87
ncbi_101756125	--	0.42	0.52	0.37	0.69	1.24	1.11	0.3	0.31	0.22	0.21	0.44	0.39
ncbi_101756126	HAK25	7.08	8.32	7.11	12.78	18.94	19.11	33.69	16.6	12.01	12.59	13.27	10.4
ncbi_101756127	KLCR2	0.24	0.38	0.77	0.46	0.76	0.39	2.83	2.67	2.33	2.63	2.01	1.59
ncbi_101756128	--	1.79	2.04	2.64	1.59	2.15	1.86	3.17	3.9	3.96	5.54	5.59	4.37
ncbi_101756130	WRKY2	1.76	1.43	1.94	4.24	9.12	6.58	7.45	3.04	3.2	4.39	3.58	3.6
ncbi_101756132	21D7	29.28	21.14	27.42	33.61	37.12	36.04	44.05	43.45	37.89	49.69	48.56	51.18
ncbi_101756133	MNS1	10.49	9.58	13.67	6.79	8.98	9.33	18.43	17.69	17.73	19.23	19.27	18.05
ncbi_101756138	HDA15	10.48	10.85	13.69	10.06	15.09	12.99	12.29	14.62	15.57	12.79	13.11	11.94
ncbi_101756139	PEPR1	6.79	6.98	4.61	2.84	2.86	3.9	0.91	3.66	3.38	0.41	0.93	0.59
ncbi_101756142	--	3.35	2.82	5.35	3.11	2.98	3.58	4.22	4.4	4.91	8.52	9.06	7.51
ncbi_101756144	yeaD	80.96	78.26	70.09	49.05	68.11	49.55	212.97	190.9	145.71	145.84	114.79	120.83
ncbi_101756145	CAD8A	83.21	40.93	6.86	92.68	20.17	23.94	3.68	13.42	7.08	1.01	1.25	1.17
ncbi_101756146	NAPRT2	8.43	6.92	9.91	37.36	26.22	24.35	27.98	14.7	9.63	16.16	15.59	16.78
ncbi_101756149	CFM2	2.73	3.02	3.53	1.83	2.45	2.11	2.19	5.09	4.62	7.71	8.35	6.37
ncbi_101756150	DTX27	7.22	8.58	15.24	8.71	13.56	12.57	17.52	25.07	22.57	31.06	31.64	24.96
ncbi_101756151	Os06g0520600	13.38	21.91	22.6	10.16	10.35	10.84	13.78	14.79	13.38	11.46	16.72	9.37
ncbi_101756152	PSY3	11.3	9.6	9.17	12.92	12.06	12.05	4.64	6.44	6.08	2.68	3.63	4.86
ncbi_101756153	PUS10	1.42	1.68	2.17	1.24	1.39	1.73	5.49	5.77	4.2	7.18	6.73	6.31
ncbi_101756154	--	43.53	43.66	32.78	34.56	37.2	31.84	63.8	54.21	57.96	53.23	77.08	68.46
ncbi_101756155	--	45.85	42.42	49.16	24.64	29.86	26.97	40.28	44.91	42.42	77.47	68.17	54.83
ncbi_101756156	v1g140887	1.96	1.77	3.18	1.72	3.52	3.84	7.78	6.98	6.26	10.13	9.52	7.26
ncbi_101756157	TUBG2	1.56	1.95	3.22	1.09	1.13	0.98	5.3	5.77	5.87	5.87	6.1	5.62
ncbi_101756158	--	6.71	6.17	10.86	5.31	4.57	3.72	3.9	9.03	14.28	5.02	9.68	11.15
ncbi_101756159	--	1	0.71	1.18	0.67	1.5	1.16	5.44	4.36	4.12	7.77	5.79	5.83
ncbi_101756167	Os04g0602400	7.77	7.17	13.18	3.85	3.77	4.48	18.33	22.92	21.78	34.36	38.37	43.43
ncbi_101756173	DCAF1	7.37	7.4	9.11	7.44	8.28	7.85	12.03	12.15	12.7	14.25	14.26	12.69
ncbi_101756175	SYD	0.97	0.73	4.99	0.56	1.2	0.67	1.52	0.76	1.25	1.58	2.11	3.01
ncbi_101756177	APK3	0.81	0.58	0.46	1.15	1.99	1.21	2.08	2.8	2.34	0.88	0.87	0.45
ncbi_101756178	FTSH5	2.45	2.61	4.5	1.68	3.93	2.98	5.61	4.1	5.49	7.32	6.81	5.21
ncbi_101756179	SAC9	22.46	20.55	22.44	13.71	18	16.41	13.34	17.89	20.82	21.17	22.44	17.63
ncbi_101756181	ARAD1	5.65	1.73	5.04	6.21	8.39	7.38	10.23	8.2	5.11	10.28	8.99	8.02
ncbi_101756184	At1g34470	25.78	18.68	28.31	34.02	24.97	24.76	18.84	23.86	22.96	12.97	14.57	13.71
ncbi_101756186	CFBP	5.19	6.54	7.52	5.02	6.51	6.98	6.46	6.41	10.06	5.88	6.92	7.94
ncbi_101756188	At1g11050	5.67	5.88	6.7	9.14	15.7	13.96	16.34	14.04	13.05	6.56	9.13	10.8
ncbi_101756192	--	0.26	0.31	0.66	0.66	1.1	1.18	2	1.64	1.01	1.62	1.12	1.04
ncbi_101756193	CSLG2	10.56	16.42	9.2	6.99	11.61	15.21	8.25	6.05	10.69	8.98	7.48	11.51
ncbi_101756194	--	18.03	22.26	25.64	43.81	54.89	40.32	38.65	31.72	25	25.32	45.43	46.87
ncbi_101756198	DTX12	24.48	19	19.43	78.87	73.16	77.37	11.81	18.64	16.56	11.48	10.18	12.92
ncbi_101756199	SPO11-1	1.92	2.29	3.74	1.78	2.93	2.54	1.36	1.47	1.19	2.3	2.49	1.82
ncbi_101756203	DCL2A	3.53	2.94	2.6	6.38	6.51	5.51	4.34	3.37	3.68	2.94	2.7	2.26
ncbi_101756207	Os06g0143000	3.27	3.2	5.33	2.23	2.93	3.28	3.25	5.15	5.25	12.71	10.79	10.57
ncbi_101756208	--	8.82	11.63	15.88	6.48	11.16	12.49	19.79	17.94	12.1	7.07	12.67	11.29
ncbi_101756209	CCT1	9.4	9.75	14.17	8.48	9.41	10.6	23.01	25.82	19.89	22.36	17.72	19.48
ncbi_101756210	--	1.02	1	0.42	0.31	0.37	0.56	0.37	0.83	0.83	0.12	0.5	0.06
ncbi_101756212	--	0.45	0.78	0.69	0.39	0.89	0.64	0.77	0.65	0.57	0.87	0.95	1.17
ncbi_101756213	MSL10	0.6	0.52	0.6	0.81	1.21	1.3	1.53	1.01	1.18	1.61	1.87	2.01
ncbi_101756214	MSL2	77.61	88.9	114.21	79.82	101.5	78.58	109.75	123.78	138.38	170.43	176.46	157.72
ncbi_101756215	PDCB2	0	0.39	0.22	0	0.2	0.16	1.02	0.27	0.78	0	0	0.31
ncbi_101756217	Os12g0234800	3.84	4.04	4.68	3.99	3.94	4.38	7.59	5.27	6.89	5.81	7.61	4.81
ncbi_101756219	TBL24	0.68	1.4	0.95	0.34	0.59	0.13	7.12	6.89	9.96	3.24	2.75	2.58
ncbi_101756220	TAD2	1.48	2.4	1.58	1.31	1.7	1.73	5.08	4.84	3.11	3.04	2.76	3.27
ncbi_101756223	AVT6E	10.4	10.39	10.45	16.38	19.44	18.48	15.54	9.71	6.92	3.3	4.55	4.46
ncbi_101756224	RPL10	7.98	12.22	11.82	6.6	10.77	10.59	9.18	15.57	15.06	26.01	25.54	33.6
ncbi_101756225	--	7.21	6.59	7.74	7.23	8.42	9.77	9.44	10.6	10.83	13.78	13.66	11.35
ncbi_101756226	CLKR27	11.74	10.26	18.57	7.76	10.58	10.92	17.91	20.2	18.97	19.82	17.4	17.51
ncbi_101756227	HCF173	71.61	81.67	80.48	31.22	39.77	47.66	59.21	70.09	83.17	222.22	192.73	176.82
ncbi_101756228	NPSN11	15.41	13.28	11.28	12.19	12.9	11.57	18.75	15.22	16	12.69	13.71	14.23
ncbi_101756229	At5g16450	61.45	68.75	92.15	43.14	55.53	52.68	71.29	73.02	88.82	96.48	89.97	103.83
ncbi_101756232	--	5.57	7.5	9.39	5.03	8.95	7.14	9.21	9.96	9.18	12.11	10.38	13.84
ncbi_101756237	GATL1	24.8	31.09	31.2	19.99	30.12	53.41	49.23	65.01	58.64	10.34	20.34	15.9
ncbi_101756243	--	10.44	8.42	11.14	9.38	12.52	11.68	13.22	14.68	13.42	26.54	24.12	20.17
ncbi_101756246	IAA1	19.05	16.1	18.31	42.97	45.96	51.91	22.22	21.99	18.28	12.34	14.15	14.43
ncbi_101756247	rbcL	1.37	1.26	1.53	2.6	2.79	2	2.14	2.29	3.07	2.32	1.66	1.16
ncbi_101756248	GSK1	19.81	19.49	28.54	24.92	33.81	32.96	43.84	37.16	36.1	39.02	39.97	43.77
ncbi_101756250	FLZ10	5.88	6.55	6.16	7.75	11.4	6.88	4.81	6.59	6.07	3.84	5.29	5.11
ncbi_101756252	HSP70	782.24	409.41	142.42	398.23	23.08	53.2	194.84	161.79	140.28	188.4	154.07	114.46
ncbi_101756253	LSM3B	2.54	2.54	4.78	3.31	3.92	5.76	5.52	6.2	4.37	4.13	3.75	5.37
ncbi_101756255	--	9.79	10.41	12.17	13	17.3	14.5	26.17	23.44	18.66	19.66	14.04	17.07
ncbi_101756256	NAC056	1.01	1.39	0.82	0.88	1.28	0.82	3.34	2.07	1.81	0.61	1.3	0.89
ncbi_101756257	SCI1A	5.49	4.42	5.61	2.78	4.79	4.23	13.36	13.38	9.99	10.86	10.56	10.93
ncbi_101756260	ML5	27.55	27.49	26.2	22.02	27.39	25.69	64.78	40.23	32.86	45.85	47.97	40.73
ncbi_101756262	ML4	37.74	36.76	42.85	37.17	44.45	40.5	48.41	40.31	37.72	49.75	46.59	44.66
ncbi_101756263	CBP60B	75.08	63.85	80.96	82.18	100.58	102.7	131.94	104.17	114.16	117.5	118.5	129.87
ncbi_101756271	PHI-1	109.77	189.82	305.86	69.98	49.18	66.42	74.29	135.35	148	25.2	43.09	47.02
ncbi_101756273	LKR/SDH	24.93	18.94	46.07	41.47	38.62	37.51	80.18	38.87	67.45	99.82	98.15	61.05
ncbi_101756274	BGLU31	15.02	14.95	15.89	6.73	9.37	10.12	19.85	21.24	25.5	15.83	16.75	17.57
ncbi_101756275	--	1.9	1.55	1.81	1.71	3.77	1.7	4.11	3.38	3.6	1.92	2.21	2.47
ncbi_101756280	DIT2	9.28	8.82	13.19	8.39	7.71	8	25.88	34.65	34.61	30.49	27.05	30.42
ncbi_101756281	Os09g0103500	0.65	1.13	0.78	0.76	0.83	0.98	2.95	2.62	2.01	1.76	0.64	2.29
ncbi_101756288	--	26.42	33.32	10.62	9.36	11.24	11.53	9.29	12.21	9.65	7.63	5.78	5.66
ncbi_101756291	--	1.33	1.03	1.69	1.83	2.1	1.55	4.7	2.76	2.15	2.87	2.63	2.47
ncbi_101756292	PIP2-6	0.43	0.61	0.69	0.27	0.83	0.53	14.81	18.42	19	15.77	12.37	10.8
ncbi_101756295	RUB1	44.28	41.81	45.45	60.08	55.08	55.44	54.78	58.86	52.67	82.41	73.5	74.34
ncbi_101756296	--	13.05	15.16	13.7	9.41	14.01	12.43	11.74	14.46	14.09	17.89	18.1	20.45
ncbi_101756297	--	2.38	1.9	5.73	1	0.9	1.26	10.33	8.99	7.02	8.55	8.45	10.02
ncbi_101756298	--	47.72	54.6	60.86	138.49	134.87	159.13	40.02	41	36.78	32.31	63.37	46
ncbi_101756299	FDX2	12.34	17.13	17.47	11.1	14.63	13.67	32.75	32.49	34.74	32.63	27.81	29.19
ncbi_101756300	PAL	1.78	1.31	4.64	0.31	0.56	0.3	1.9	3.75	10.38	1.87	1.39	3.21
ncbi_101756301	At5g47030	27.24	28.18	37.13	26.72	33.53	28.78	64.35	63.16	64.96	49.72	47.31	58.56
ncbi_101756302	CIGR1	1072.57	1119.75	624.64	1097.01	502.48	853.75	191.52	300.07	293.13	83.39	201.32	151.69
ncbi_101756303	FRS5	2.3	2.92	2.75	2.81	4.2	3.82	3.8	4.2	4.18	5.35	5.27	4.51
ncbi_101756304	BPA1	6.16	4.12	7.81	6.56	8.12	8	13.03	12.35	12.28	13.85	11.16	8.22
ncbi_101756305	SPBC2A9.03	14.03	18.38	21.05	9.81	17.5	20.57	50.85	45.21	62.43	39.86	38.43	28.81
ncbi_101756318	--	1.08	0.95	1.48	2.45	5.4	3.17	0.92	1.36	1.5	0.97	1.85	2.93
ncbi_101756319	D27	10.09	10.39	10.74	8.38	11.54	8.35	6.4	7.64	10.01	12.1	10.44	13.34
ncbi_101756320	--	4.04	3.15	4.54	3.49	5.18	2.84	5.02	5.45	3.77	5.07	4.25	4.98
ncbi_101756321	--	8.99	7.42	10.17	5.7	8.15	8.67	24.12	23.11	19.75	24.72	22.59	19.93
ncbi_101756322	PFK3	5.46	2.95	3.56	3.69	5.94	3.46	6.69	3.16	2.9	0.93	0.95	2.25
ncbi_101756323	MYB2	0.55	0.43	1.25	0.3	0.55	0.06	0.04	0.35	0.64	0.26	0.03	0.18
ncbi_101756326	MDIS2	24.85	44.46	44.43	22.35	31.22	34.93	22.63	40.57	42.02	11.77	15.24	15.49
ncbi_101756329	SODA.4	37.58	44.58	66.68	47.44	44.79	41.47	70.32	80.43	73.97	70.82	68.38	64.87
ncbi_101756330	At5g13200	185.38	119.97	111.78	297.77	151.49	185.01	40.76	28.19	27.69	29.88	67.69	32.23
ncbi_101756331	ZSD1	3.73	3.78	3.92	2.41	3.06	2.89	6.25	7.03	7.36	6.11	5.78	8.18
ncbi_101756332	GATA4	2.41	1.2	0.89	4.48	3.67	2.19	2.3	2.5	1.68	0.99	1.25	0.86
ncbi_101756333	MAIL3	3.91	4.16	5.28	4.57	5.31	4.91	8.29	7.95	7.23	9.7	8.44	7.92
ncbi_101756334	DHS	4.34	3.54	3.69	1.98	2.15	2.88	6.09	5.59	7.56	6.63	6.32	6.17
ncbi_101756344	At2g30600/At2g30610	11.15	13.22	23.11	4.94	7.96	7.4	22.51	25.61	29.57	25.04	25.21	26.35
ncbi_101756345	HTR4	376.94	399.13	396.84	424.98	409.81	446.59	367.24	344.56	285.99	281.11	459.37	299.63
ncbi_101756346	DCL2A	0.29	0.54	0.87	0.41	0.74	1.06	1.56	1.16	1.8	0.72	1.24	1.19
ncbi_101756348	GLK1	5.45	7.71	7.89	2.6	7.23	4.92	16.1	27.18	24.3	36.02	28.57	43
ncbi_101756349	Phip	17.26	19.43	20.88	11.46	14.75	14.81	15.29	15.46	18.51	21.06	21.79	17.45
ncbi_101756350	--	18.79	13.05	9.85	35.59	34.92	30.66	39.66	29.38	20.31	48.47	41.33	39.57
ncbi_101756351	BBR	12.09	9.61	9.42	22.95	24.92	21.53	9.84	7.9	5.45	7.71	6.98	9.59
ncbi_101756352	--	0.24	0.28	0.32	0.26	0.13	0.18	0.62	1.07	0.9	0.92	1.19	0.56
ncbi_101756353	At5g27470	0.44	0.71	0.56	0.54	0.32	0.38	0.81	0.72	0.41	0.45	0.9	0.17
ncbi_101756354	BG1	0.2	0.17	0.34	0.23	0.88	0.44	1.02	0.55	0.58	0.08	0.47	0.04
ncbi_101756357	--	3.39	3.45	4.34	2.11	2.66	2.45	4.97	10.02	8.78	7.54	9.42	9.29
ncbi_101756362	IBI1	27.6	25.7	33.85	26.82	28.89	31.3	40	45.29	44.63	38.64	41.14	42.86
ncbi_101756363	MGLL	21.75	25.24	24.1	26.49	26.11	27.34	24.97	23.93	19.12	15.83	19.94	20.4
ncbi_101756364	RLCK185	17.27	17.9	25.13	23.42	33.12	26.44	19.41	15.56	13.68	18.01	19.9	16.29
ncbi_101756367	HIPP20	37.82	23.82	59.32	38.21	69.82	62.28	60.94	57	58.59	91.13	68.61	82.8
ncbi_101756368	ILL1	10.5	10.02	11.49	11.19	10	11.59	31.39	26.32	22.1	28.07	23.61	24.44
ncbi_101756369	RAN1	0.38	0.5	0.58	0.38	0.49	0.62	0.62	1.14	0.89	1.38	0.84	0.55
ncbi_101756371	VTE6	4.12	2.74	4.12	3.19	4.38	3.41	13.72	8.13	7.14	15.54	11.98	9.6
ncbi_101756373	--	1.53	2.34	2.63	0.4	1.27	1.39	6.07	5.06	4.24	4.54	6.08	6.47
ncbi_101756376	CYP734A2	0.67	0.28	0.13	0.53	0.51	0.48	1.45	1.18	0.7	0.9	1.58	0.88
ncbi_101756377	SUVH4	3.56	3.98	4.59	7.18	9.26	5.78	4.11	3.29	4.26	2.91	3.54	2.69
ncbi_101756378	CM2	12.24	19.24	17.23	5.13	7.12	5.33	10.98	12.39	13	7.34	5.55	5.21
ncbi_101756379	CML23	4.13	1.73	1.44	4.81	3.07	3.26	3.2	1.99	1.31	1.96	1.01	0.74
ncbi_101756381	nifk	13.69	11.83	17.28	14.49	13.9	14.16	34.17	40.49	31.62	25.8	22.55	26.31
ncbi_101756384	--	0.63	0.81	1.16	0.6	0.88	0.73	4.61	4.71	3.07	4.7	4.39	5.49
ncbi_101756387	RIBA2	661.19	765.04	575.67	780.78	505.88	595.28	148.85	265.83	306.44	81.4	139.1	108.65
ncbi_101756390	EIF2S3	16.93	16.35	20.93	16.74	19.66	17.49	37.61	40.58	38.26	40.78	32.56	37.57
ncbi_101756391	BC10	0.36	0.39	0.91	0.53	0.77	0.78	0.65	0.88	0.9	0.18	0.07	0.07
ncbi_101756392	PCFS4	10.05	10.76	13.41	8.16	10.47	9.49	16.29	17.14	15.95	18.59	18.65	17.22
ncbi_101756393	FIM5	17.73	20.19	23.8	28.58	36.01	25.81	19.13	23.58	22.96	23.22	20.77	19.75
ncbi_101756394	Os08g0159900	10.86	10.21	12.47	10.58	11.38	9.87	14.97	14.3	15.09	23.37	20.42	16.9
ncbi_101756395	RSS3	1.06	0.75	1.32	0.52	1.15	0.68	3.85	1.48	1.15	2.48	3.25	2.56
ncbi_101756396	--	0.29	0	0.42	0	0.08	0	0.65	0.92	1.41	1.27	1.22	0.67
ncbi_101756397	SIRP1	1.4	0.98	1.14	1.04	1.05	0.96	1.72	4.03	3.36	8.5	8.29	7.55
ncbi_101756399	ERF060	27.71	30.61	62.91	143.96	365.44	365.89	98.8	46.75	50.41	74.88	109.87	89.94
ncbi_101756402	--	0.5	0.99	0.5	0.46	1.01	0.69	2.95	2.69	2.54	2.96	2.82	2.77
ncbi_101756403	MAP2B	13.56	11.61	15.86	16.34	15.95	16.79	33.48	26.72	20.7	28.97	27.92	27.13
ncbi_101756411	VATG1	18.24	20.29	35	14.93	24.33	20.75	43.21	38.9	37.26	39.88	39.19	45
ncbi_101756412	Os07g0281700	2.62	1.55	1.94	1.64	2.16	2.57	1.35	1.81	2.77	1.89	1.98	2.69
ncbi_101756415	--	0.88	0.5	1.48	1.19	1.18	1.57	0.88	1.26	1.15	1.71	1.5	1.31
ncbi_101756418	GSVIVT00026920001	9.35	10.01	13.14	9.5	12.02	11.79	14	16.04	13.74	10.89	10.59	11.67
ncbi_101756419	--	0.73	0	0.8	0	0.15	0.32	16.22	0.53	0.06	5.57	4.84	1.17
ncbi_101756420	GCN2	5.27	4.64	5.79	5.94	5.89	5.69	7.94	6.37	6.14	10.14	8.31	5.85
ncbi_101756421	URGT6	4.56	4.75	6.37	9.06	14.86	6.53	0.3	0.7	0.35	0.51	0.31	0.11
ncbi_101756422	GATL3	0.31	0.67	0.93	0.31	0.36	0.54	1.61	1.49	2.64	0.54	0.51	0.78
ncbi_101756423	NUDT8	308.54	369.85	399.38	289.39	464.93	378.39	94.43	188.14	219.24	33.66	68.38	97.76
ncbi_101756424	VPS24-2	84.66	87.16	83.13	73.48	84.22	81.18	37.55	41.24	43.19	26.68	27.05	23.41
ncbi_101756425	BC10	61.15	68.86	79.41	30.89	29.8	29.88	18.22	33.07	34.88	12.4	12.3	12.16
ncbi_101756426	CAMPLR22A2D_LOCUS4590	8.74	7.95	13.09	7.14	6.99	7.03	26.19	24.62	22.66	28.78	27.06	28.02
ncbi_101756429	NPSN13	0.81	1.51	2.08	0.28	1.24	0.44	3.46	4.21	3.94	2.4	2.72	2.7
ncbi_101756432	CARM1	6.45	8.24	11.63	2.85	5.01	4.77	20.99	21.57	18.21	23.35	20.02	19.01
ncbi_101756433	NRPE5A	0.12	0.07	0.61	0.15	0.05	0	1.28	0.31	0.55	0.12	0.22	0.36
ncbi_101756436	RPP2A	0.3	0.32	0.22	0.43	0.5	0.13	0.08	1.05	0.28	0.62	0.27	0.15
ncbi_101756442	GFPT2	13.72	17.42	19.91	24.43	26.32	23.53	17.48	19.78	18.55	17.46	13.42	18.18
ncbi_101756443	LTP1	197.9	194.75	410.04	73.93	127.36	86.06	914.71	570.94	614.95	425.07	588.24	638.05
ncbi_101756444	NLP2	9.36	9.92	10.98	7.55	10.66	8.98	13.75	15.58	17.21	20.67	23.16	15.68
ncbi_101756445	PCO3	4.2	4.27	4.98	3.18	4.86	4.54	5.8	5.53	5.28	7.26	7.53	8.36
ncbi_101756446	SEC23	51.36	44.51	45.28	59.1	59.46	52.92	43.13	46.58	48.38	38.2	38.33	40.22
ncbi_101756447	--	9.44	10.18	11.39	7.94	10.5	10.11	17.02	14.7	14.61	13.85	16.24	12.92
ncbi_101756450	--	6.35	6.9	9.87	6.08	8.38	6.54	12.37	13.19	10.87	18.27	16.26	14.11
ncbi_101756452	TRABD	6.57	7.8	7.72	4.27	7.04	7.59	13.72	12.46	12	12.76	12.75	12.45
ncbi_101756454	CSTLP2	1.48	2.41	4.01	0.71	1.17	1.1	5.97	5.84	7.28	5.23	4.33	4.81
ncbi_101756461	VPS35B	25.9	25.85	29.35	29.54	32.63	29	32.31	34.83	32.11	39.18	36.88	38.46
ncbi_101756462	At1g18900	6.79	4.82	5.39	11.77	13.98	11.82	12.61	8.66	7.45	12.05	12.02	10.68
ncbi_101756466	B'BETA	8.71	7.23	9.62	12.59	17.23	15.42	9.78	11.18	10.63	10.95	11.57	12.42
ncbi_101756467	WRKY34	28.61	62	43.41	49.6	57.55	47.09	5.29	5.67	3.66	1.65	0.9	0.56
ncbi_101756470	LBD36	1.13	0.59	0.87	1.38	1.18	1.6	2.19	2.09	1.11	1.56	2.24	1.56
ncbi_101756475	RIPK	7.25	7.17	6.91	7.23	8.67	10.08	11.36	11.76	10.08	9.17	10.68	12.21
ncbi_101756477	UBP10	55.99	56.44	50.97	46.44	49.53	42.95	25.94	30.41	31.94	31.59	29.51	21.94
ncbi_101756479	At3g03100	34.96	37.24	47.56	25.63	30.96	29.27	78.27	72.33	69.24	71.72	67.93	56.64
ncbi_101756480	APG	1.93	2.65	2.86	0.54	0.78	0.82	6.23	4.98	6.33	7.44	12.67	11.01
ncbi_101756482	OFUT15	1.3	1.71	2.53	0.79	0.83	0.87	1.96	3.37	3.29	3.35	3.38	3.35
ncbi_101756483	SPAC630.12	6.38	4.62	10.66	5.56	7.78	5.74	12.14	11.83	11.94	10.72	10.05	12.66
ncbi_101756485	--	0.74	0.94	1.75	2.25	1.94	3.25	2.04	3.98	1.73	8.31	4.45	5.46
ncbi_101756486	At1g06900	8.04	7.09	9.81	4.56	6.11	6.1	8.98	9.84	12.12	9.5	10.21	7.89
ncbi_101756487	BZR3	6.14	7.67	8.66	11.24	15.71	15.06	8.42	8.59	9.29	3.75	4.64	3.46
ncbi_101756488	AGD2	3.23	4.9	6.95	2.14	3.43	2.86	13.3	14.39	11.78	12.39	12.97	11.53
ncbi_101756489	--	9.33	9.59	11.34	7.91	9.42	7.3	13.95	14.33	14.72	12.8	13.71	16.1
ncbi_101756490	VAC14	52	63.29	56.84	49.97	57.51	62.25	38.27	38.83	36.78	41.56	43.06	40.83
ncbi_101756493	CPK7	7.46	7.73	10.61	25.02	36.28	33.65	4.42	5.04	6	2.55	2.73	1.77
ncbi_101756501	--	54.1	62.19	52.91	78.05	129.79	99.59	66.13	34.84	34.89	61.69	42.91	59.68
ncbi_101756502	GAT1_2.1	1.11	0.84	0.92	0.73	0.8	0.32	1.88	1.36	1.44	0.3	1.18	0.26
ncbi_101756504	Os02g0677700	0.78	0.93	0.9	0.83	1.33	1.07	1.77	4.38	3.97	2.34	3.27	2.37
ncbi_101756506	MPP	45.74	45.26	53.8	36.57	43.11	39.98	78.89	82.43	77.46	72.99	66.08	75.23
ncbi_101756508	SAMS1	384.51	257.73	694.78	824.93	845.68	604.89	770.84	836.83	956.39	441.21	492.47	499.78
ncbi_101756510	BHLH144	14.78	17.65	18.45	15.66	23.66	19.5	12.18	18.79	21.94	10.67	10.4	10.85
ncbi_101756512	PMAT1	1.64	0.63	0.13	0.29	0.19	0.36	1.32	0.72	0.05	3.85	2.78	1.83
ncbi_101756513	WRKY51	9.23	19.72	14.7	19.55	29.14	31.58	47.45	54.78	49.2	3.13	4.17	9.29
ncbi_101756514	--	2.2	1.55	3.82	1.02	2.13	1.96	5.65	3.71	3.2	5.93	4.25	5.66
ncbi_101756516	HPR	187.42	182.9	173.93	104.81	141.43	140.64	148.71	182.34	202.45	399.85	362.4	379.63
ncbi_101756517	FBA1	154.08	103.42	113.45	249.18	127.63	146.71	348.26	243.47	183.15	191.42	155.49	210.1
ncbi_101756518	Os01g0917400	14.14	14.95	19.27	11.62	12.34	12.42	20.67	25.68	28.29	28.52	27.92	29.41
ncbi_101756519	BZIP1-B	12.35	12.27	17.64	9.76	10.13	10.13	10.17	14.94	14.5	21.17	24.41	19.88
ncbi_101756520	2023-08-04	5.8	8.31	7.69	4.82	5.34	6.1	11.74	10.85	12.13	10.21	7.75	10.27
ncbi_101756522	SIRB	1.7	1.1	2.92	0.86	1.5	0.73	3.16	3.67	4	4.17	3.93	5.18
ncbi_101756525	dlcB	0.11	0.46	0.54	0.09	0.26	0	1.31	0.28	0.68	1.3	1.06	1.28
[truncated: 15,431 more rows]
