# Supplementary material for: Transcriptome-based analysis of key pathways relating to yield formation stage of foxtail millet under different drought stress conditions
Source: Front Plant Sci. 2023 Feb 3;13:1110910. doi: 10.3389/fpls.2022.1110910 (PMC9937063; doi:10.3389/fpls.2022.1110910)
Supplement: Supplementary file 4 [file DataSheet_4.xlsx]

## Sheet: MM04
Table S6 Differentially expressed genes within modules 04
Gene id	Symbol	LD-1	LD-2	LD-3	LDCK-1	LDCK-2	LDCK-3	HD-1	HD-2	HD-3	HDCK-1	HDCK-2	HDCK-3
ncbi_101752680	At3g09470	0.37	0.44	0.66	0.83	0.9	0.53	0.65	0.3	0.66	0.45	0.74	1.02
ncbi_101752923	NAC100	2.53	2.41	4.26	6.05	8.52	6.96	4.45	4.78	5.11	3.63	3.34	4.29
ncbi_101752979	GME-1	78.75	77.39	72.71	119.21	135.04	133.42	106.46	89.11	80.55	103.86	79.64	126.38
ncbi_101753203	WRKY55	1.38	1.38	1.23	2.99	5.32	3.69	2.95	3.27	3.03	2.52	3.22	2.48
ncbi_101753535	AAA1	3.62	3.26	4.39	6	8.28	7.68	6.23	5.46	6.67	5.74	7.73	5.48
ncbi_101753800	RHC1A	8.06	5.65	6.1	8.78	14.89	13.28	10.87	8.23	8.84	8.74	9.56	10.23
ncbi_101753906	TRI1	20.15	21.89	20.88	21.56	26.16	23.8	18.69	23.33	21.13	24.74	21.16	19.92
ncbi_101753980	TULP5	0.15	0.17	0.49	0.85	1.5	1.23	0.93	0.52	0.43	0.9	0.7	0.54
ncbi_101754199	ILL6	22.52	22.99	29.35	38.53	53.75	43.72	33.16	32.58	33.55	29.16	23.06	40.79
ncbi_101754408	SPHK1	22.32	17.41	16.74	34.42	31.69	32.34	32.18	21.56	23.8	26.64	29.74	27.68
ncbi_101754413	--	2.37	1.92	2.01	4.06	6.07	6.17	3.71	3.46	3.41	2.97	2.22	4.44
ncbi_101754531	Cenpv	0.47	0.79	0.77	1.44	1.39	1.23	1.11	0.57	0.98	0.86	0.9	1.18
ncbi_101754539	CIPK21	9.81	12.43	12.05	19.59	23.32	22.55	8.93	15.1	21.38	17.2	18.72	12.76
ncbi_101754695	SIRP1	4.59	5.19	5.87	6.47	10.85	7.51	9	5.22	6.73	8.77	7.56	6.2
ncbi_101754852	NPF2.11	4	2.85	4.45	14.27	33.44	22.72	12.08	8.41	9.19	11.74	7.48	6.39
ncbi_101754925	NAC078	25.74	25.71	26.71	62.91	62.94	60.72	47.17	46.92	40.2	51.21	51.68	46.13
ncbi_101755261	At2g46620	52.04	50.39	50.93	43.84	33.84	42	55.74	39.61	35.73	39.67	47.32	44.02
ncbi_101755516	ACT1	21.58	16.65	21.83	38.13	40.28	35.41	27.93	29.56	32.2	31.1	26.42	23.47
ncbi_101755733	IP5P12	2.12	1.63	1.94	1.83	2.57	2.75	1.98	2.03	2.13	2.13	1.76	2.51
ncbi_101755787	--	15.98	13.53	15.49	18.44	24.9	20.68	20.4	15.34	17.45	19.48	20.35	17.29
ncbi_101755887	GATA26	3.89	5.06	5.11	5.4	9.1	8.67	3.79	5	5.63	5.53	6.08	6.87
ncbi_101755896	OsI_025469	94.84	68.64	79.21	181.64	178.81	153.98	185.29	123.55	101.77	144.55	140.36	142.66
ncbi_101756194	--	18.03	22.26	25.64	43.81	54.89	40.32	38.65	31.72	25	25.32	45.43	46.87
ncbi_101756462	At1g18900	6.79	4.82	5.39	11.77	13.98	11.82	12.61	8.66	7.45	12.05	12.02	10.68
ncbi_101756466	B'BETA	8.71	7.23	9.62	12.59	17.23	15.42	9.78	11.18	10.63	10.95	11.57	12.42
ncbi_101756698	--	0.44	0.65	0.76	0.77	1.68	1.14	0.86	1.2	1.06	0.45	0.75	0.99
ncbi_101757294	PAT24	23.68	20.74	25.4	27.38	29.48	27.94	26.77	23.29	22.19	26.73	25.08	23.07
ncbi_101757312	PGR	1.66	1.89	1.65	4.93	7.35	3.68	3.38	2.78	1.71	4.4	2.4	3.06
ncbi_101757474	SAUR36	45.24	43.01	57.21	55.55	85.54	61.13	62.8	54.89	61.9	47.94	63.25	74.73
ncbi_101757496	FAR1	1.86	1.47	1.47	0.79	0.98	0.78	0.98	0.92	1.84	1.27	0.62	1.19
ncbi_101757523	PI4KG7	35.92	36.3	43.23	74.38	81.16	70.09	33.6	41.15	47.55	64.19	80.13	62.22
ncbi_101758178	PHL7	24.1	16.04	19.9	38.67	40.04	40.08	41.27	27.46	24.43	31.57	33.33	30.87
ncbi_101758213	Os04g0656100	160.83	175.17	166.34	353.71	374.55	413.08	366.62	261.92	268.84	333.82	336.83	311.54
ncbi_101758274	--	1.6	1.11	3.04	2.79	5.06	4.45	0.72	2.24	1.9	3.42	2.57	2.26
ncbi_101758377	EBF1	21.01	27.05	39.77	25.98	119.63	50.76	50.17	27.61	26.01	28.13	38.34	33.85
ncbi_101758931	Os03g0107900	1.59	0.54	1.32	2.52	4.19	3.04	3.2	2.9	2.5	2.6	3.3	2.97
ncbi_101758952	--	0.56	1.73	2.9	1.15	6.29	4.92	2.09	3.93	2.6	3.28	2.61	1.92
ncbi_101759176	--	8.56	7.96	11.1	13.94	16.43	12.31	13.48	12.44	10.02	12.15	12.86	12.15
ncbi_101759178	CCX1	2.68	2.6	3.12	5.3	8.63	7.24	3.38	4.09	3.82	3.21	7.2	4.61
ncbi_101759458	SLC25A44	0.03	0	0.1	0.8	1.34	1.23	0.3	0.26	0.22	0.69	0.46	0.64
ncbi_101759510	--	0.48	0.21	1.26	0.28	2.47	0.92	0.32	0.63	0.31	1.23	0.74	0.05
ncbi_101759641	PIR7A	0.82	1.47	1.38	1.64	3.4	2.16	1.01	1.9	2.61	1.23	1.3	1.27
ncbi_101759645	CG8135	16.43	16.78	16.8	17.84	22.3	17.86	19.69	18.28	15.82	19.65	19.91	17.33
ncbi_101759736	EL2	14.83	11.76	10.34	25.94	31.37	35.33	11.36	15.65	17.91	19.22	18.62	28.79
ncbi_101760490	-	2.52	1.65	2.35	4.26	4.67	3.45	3.23	3.41	3.08	3.34	2.73	2.99
ncbi_101760572	TIF34	30.69	27.68	32.28	31.37	37.26	32.54	26.62	28.22	29.01	30.52	31.33	29.92
ncbi_101760798	NPG1	1.67	1.61	1.8	3.12	5.1	2.93	3.29	2.49	3.57	2.38	3.16	3.22
ncbi_101761249	BBD	1.37	1.37	0.9	2.79	3.28	5.06	1.88	1.85	1.69	2	4.88	3.23
ncbi_101761549	NUDT13	0.46	0.76	0.57	1.02	7.74	4.17	0.93	1.85	2.22	0.81	0.72	0.96
ncbi_101761581	At3g55350	0.03	0.11	0.17	1	0.98	0.82	0.38	0.18	0.4	0.9	1.32	0.37
ncbi_101761659	RBX1	21.77	16.84	23.74	35.96	42.53	36.58	35.06	25.69	25.57	24.9	27.58	28.55
ncbi_101761876	CERK1	10.38	12.36	8.11	4.8	1.75	3.99	8.08	8.55	7.06	3.18	5.57	4.5
ncbi_101761934	--	14.08	15.81	19.01	19.51	23.17	20.76	21.65	18.16	15.35	18.21	18.11	21.01
ncbi_101762029	--	18.31	14.69	21.06	22.56	25	23.82	20.43	19.16	16.99	25.43	23.92	22.59
ncbi_101762129	B3GALT12	1.78	1.58	2.61	4.55	3.63	3.7	3.58	3.76	3.41	4.31	3.77	2.68
ncbi_101762205	PVA13	3.98	3.32	5.03	6.54	12.34	12.4	6.54	4.23	4.77	7.79	10.37	11.73
ncbi_101763292	wdr11	8.92	8.22	9.4	9.69	13.28	11.4	9.66	9.33	10.63	8.72	8.9	9.08
ncbi_101763458	IDD5	16.58	11.61	19.31	18.43	27.86	20.35	21.33	18.91	14.01	14.72	19.68	18.66
ncbi_101763774	P23-2	2.76	3.91	4.95	5.62	9.42	5.3	6.31	4.98	5.9	5.79	6.57	5.36
ncbi_101763835	GLR2.7	1.59	2.19	1.01	0.75	0.68	0.7	1.49	1.81	1.15	0.73	0.47	0.7
ncbi_101764057	GAUT11	5.02	4.69	6.73	7.84	14.41	10.26	8.53	10.39	8.08	7.15	8.05	7.18
ncbi_101764444	RGA1	3.75	4.21	5.17	4.18	6.42	5.29	4.04	4.33	4.55	5.33	4.66	4.05
ncbi_101764507	--	0.63	0.48	0.68	1.8	1.62	1.79	1.26	0.57	0.46	1.01	1.29	0.97
ncbi_101765205	At2g24330	1.95	2.43	2.74	3.68	4.47	3.79	2.62	2.18	2.36	3.21	2.76	3.32
ncbi_101765361	--	0.44	0.35	0.74	2.28	2.11	2.3	0.97	1.14	0.99	1.93	2.27	1.66
ncbi_101765411	Os06g0717800	20.35	24.15	29.03	32.41	43.01	34.93	23.55	23.75	21.61	37.6	36.7	34.77
ncbi_101765448	--	7.19	6.44	7.37	10.42	11.37	9.49	7.93	8.94	7.27	7.91	8.57	9.76
ncbi_101765505	--	57.86	56.36	74.01	72.03	104.03	97.43	53.01	62.33	71.74	70.52	107.84	96.29
ncbi_101765527	At2g16250	2.44	1.84	3.18	7.11	7.22	8.42	7.21	2.53	2.14	6.01	5.31	2.66
ncbi_101765564	--	23.13	18.73	27.07	24.76	33.5	29.17	26.05	22.3	24.23	28.93	25.34	31.36
ncbi_101765570	--	47.6	40.42	47.88	61.5	59.11	49.25	52.91	42.99	46.7	54.85	55.38	52.46
ncbi_101765913	--	2.54	2.05	4.97	3.72	6.2	3.65	3.04	4.17	4.33	4.72	3.55	3.52
ncbi_101765956	UBP19	18.16	22.12	18.71	11.32	11.96	11.76	13.41	16.63	14.71	13.27	13.65	12.23
ncbi_101766336	--	17.61	17.49	13.51	51.07	74.88	86.27	18.14	14.07	10.59	51.29	59.4	35.87
ncbi_101766516	FRS5	4.24	5.03	5.95	6.97	10.07	9.22	0.77	2.26	2.61	5.45	5.54	5.78
ncbi_101766833	FLZ17	32.33	37.57	44.4	67.42	75.61	85.49	57.33	66.92	58.44	67.23	38.16	64.17
ncbi_101766834	FUT11	9.86	9.51	10.82	13.16	17.71	15.06	14.74	12.46	11.21	12.13	12.81	12.75
ncbi_101766989	PRR95	76.62	72.02	107.04	79.8	127.88	118.93	81	62.49	74.12	94.51	78.95	116.44
ncbi_101767043	HD3A	4.64	5.92	3.91	0.65	0.93	1.38	2.54	4.4	3.43	2.24	2.42	1.8
ncbi_101767081	At1g66650	0.35	0.56	1.17	1	3.51	2.34	1.37	1.26	0.97	0.4	0.52	0.66
ncbi_101767398	TGA2.2	35.84	32.55	32.89	54.39	69.94	64.69	56.65	43.53	37.35	52.51	50.9	42.01
ncbi_101767693	At5g49945	39.08	30.95	37.81	50.33	60.03	52.52	39.45	43.17	37.13	45.03	43.72	43.19
ncbi_101767712	ITPK1	0.72	0.78	1.02	2.18	2.05	1.61	1.45	1.76	1.72	1.48	2	1.49
ncbi_101767794	WRKY46	25.38	26.14	26.98	35.92	45.24	42.05	28.45	34.77	34.43	29.37	28.25	34.69
ncbi_101767816	--	6.76	6.02	8.65	7.37	9.75	9.14	8.41	9.25	7.64	7.24	9.55	6.84
ncbi_101767991	CGA1	20.75	26.61	53.64	41.96	62.14	53.67	11.04	13.3	18.3	42.29	30.65	26.42
ncbi_101767993	At3g45870	5	4.62	6.29	10.5	12.11	11.84	12.17	7.52	6.16	10.49	9.26	9.22
ncbi_101768024	TPK1	2.22	1.95	3.59	4.34	7.46	5.16	4.17	3.64	2.78	3.93	3.98	4.24
ncbi_101768035	At4g18375	7.53	6.97	8.18	12.06	11.6	12.46	10.12	10.01	8.62	12.48	14.47	9.73
ncbi_101768255	--	32.99	43.42	35.68	21.22	21.72	28.31	34.49	42.7	38.27	21.03	30.89	27.9
ncbi_101768289	At1g54220	45.96	44.32	53.07	77.71	74.16	70.28	66.25	66.58	66.93	66.39	61.29	66.94
ncbi_101768433	RPN2B	39.31	35.14	37.58	44.53	48.39	43.28	45.31	39.27	36.43	43.55	44.6	42.42
ncbi_101768441	ERF109	236.81	261.15	239.64	155.69	35.79	106.06	193.78	305.44	305.88	85.58	113.84	106.75
ncbi_101768450	PTF2	1.26	0.71	1.4	2.42	3.02	1.52	1.9	1.24	1.1	2.38	1.42	2.47
ncbi_101768553	Os01g0281400	16.11	11.64	17.68	22.22	29.73	24.08	18.92	19.91	19.77	22.09	19.42	21.13
ncbi_101768706	DDB_G0282237	13.34	14.27	16.16	18.98	25.94	19.81	16.53	13.24	12.84	18.54	18.21	16.47
ncbi_101768886	SKIP15	3.65	2	3.35	6.59	6.81	7.21	4.07	4.18	4.82	5.43	3.66	4.85
ncbi_101769024	GLPK	9.94	7.87	9.72	17.17	21.85	21.23	15.84	13.83	14.4	12.92	16.91	12.12
ncbi_101769052	--	7.01	4.89	5.71	14.42	19.5	15.01	12.14	8.96	7.82	13.28	9.29	17.46
ncbi_101769316	At3g02910	1.82	0.71	1.12	3.94	5.22	2.82	2.3	1.83	3.57	2.83	1.96	1.72
ncbi_101769613	--	0.12	0.06	0.17	0.24	1.17	0.25	0.46	0.1	0.11	0.42	0.27	0.29
ncbi_101770061	NRPB1	30.72	31.98	29.33	35.59	37.01	38.49	34.18	28.35	34.43	37.66	38.23	33.68
ncbi_101770117	SPAC26H5.04	24.83	22.99	37.41	45	55.34	42.92	30.26	42.71	44.17	29.45	30.1	38.65
ncbi_101770590	ECT4	37.46	34.08	39.97	44.49	49	46.38	44.97	41.48	40.6	45.14	43.76	43.07
ncbi_101770784	--	8.27	7.37	7.8	7.78	11.69	8	8.04	8.04	8.25	9.61	9.19	8.59
ncbi_101771017	--	2.63	2.04	3.78	3.94	5.87	3.89	4.6	4.32	3.07	3.77	3.65	4.85
ncbi_101771091	GLR3.5	69.39	48.81	43.58	43.94	37.69	34.22	36.52	51.05	67.82	38.76	32.96	55.34
ncbi_101771198	OsI_14081	11.51	8.99	8.38	16.36	17.86	16.77	14.03	11.84	12.13	15.49	13.94	14.1
ncbi_101771320	CLC-A	9.15	5.07	9.72	18.87	23.93	22.87	5.02	4.93	4.3	12.21	13.99	10.19
ncbi_101771323	UPS2	7.92	7.52	10.87	19.49	38.23	44.1	27.62	19.97	20.5	30.63	26.37	30.64
ncbi_101771358	CDF1	16.9	11.33	16.81	75.65	86.8	65.81	31.46	25.29	22.67	45.4	40.71	54.09
ncbi_101771449	Os05g0480200	2.77	3.44	2.95	1.03	1.24	1.69	1.3	2.95	3.51	1.9	2.02	1.82
ncbi_101771473	EFL4	37.03	27.79	33.78	42.06	54.33	46.26	41.41	36.56	35.64	33.84	34.44	47.12
ncbi_101771571	Rnf148	0.04	0.16	0.37	0.27	0.73	1.21	0.25	0.19	0.44	0.38	1.03	0.41
ncbi_101771637	NFXL2	1.17	1.64	1.39	1.41	2.53	2.08	1.64	1.17	1.93	1.3	1.32	1.78
ncbi_101771818	UBA2	24.36	23.64	29.01	36.79	39.05	35.35	32.48	33.2	33.75	36.03	32.79	35.7
ncbi_101771875	CYP79A1	0.12	0.49	0.69	0.7	1.65	0.74	0.34	0.75	0.62	0.82	0.61	0.74
ncbi_101772005	BSK3	13.17	11.1	13.59	16.95	22.43	23.07	15.35	14.49	16.39	16.64	16.16	16.27
ncbi_101772143	GAUT7	2.99	2.48	3.52	3.3	5.71	5	3.34	3.1	3.73	4.01	3.87	3.94
ncbi_101772199	At1g56220	9.38	9.48	8.81	52.01	64.62	58.72	31.17	17.64	15.92	38.41	42.89	57.41
ncbi_101772333	XA21	3.48	8.7	5.01	1.19	3.28	2.81	4.43	4.74	4.43	1.58	5.76	2.23
ncbi_101772447	--	2.09	2.75	2.96	0.31	0.49	1.78	0.9	2.34	1.67	1.59	1.26	1.22
ncbi_101772540	NPGR2	3.35	3.43	5.43	6.87	7.62	6.63	6.04	5	5.67	5.14	5.49	6.97
ncbi_101772624	SRP14	9.3	7.05	11.07	13.4	19.09	16.3	14.83	12.37	10.84	11.62	12.24	14.11
ncbi_101772642	--	0.34	0	0.46	0.4	1.95	1.57	0.06	0.51	0.27	0.8	1.29	0.99
ncbi_101772767	--	10.31	9.79	11.27	12.55	17.85	14.69	12.19	11.58	12.31	13.34	13.29	10.63
ncbi_101772877	CDKC-1	6.23	4.41	6.35	5.55	10.27	8.77	5.94	6.1	5.64	7.96	6.47	6.27
ncbi_101772984	At1g67190	9.5	7.4	9.99	9.92	13.24	10.49	8.46	10.12	9.94	11.08	10.28	10.76
ncbi_101772986	PATL3	0.84	0.53	0.92	1.02	1.44	1.06	0.67	1.04	0.78	1.17	1.27	1
ncbi_101773071	EFM	0.91	1.02	0.9	8.22	11.21	6.84	6.83	4.18	3.95	6.89	7.39	7.16
ncbi_101773678	Os01g0618200	3.36	2.84	3.04	4.14	6.22	5.08	5.36	3.82	4.8	4.83	4.6	5.22
ncbi_101773814	HK3	50.96	41.36	54.25	61.52	79.81	66.99	58.62	48.25	44.31	73.84	72.26	61.49
ncbi_101774075	ASK1	19.6	17.66	26.26	22.87	27.13	29.14	23.25	23.05	22.38	23.63	23.8	22.57
ncbi_101774279	BBX22	5.47	6.21	9.5	10.67	19.14	15.75	5.9	5.75	5.55	10.81	11.94	11.31
ncbi_101774298	NPF8.3	22.19	20.99	24.46	38.04	42.76	42.58	31.78	22.31	21.84	41.53	38.37	36.15
ncbi_101774311	AGD8	18.85	15.34	16.93	27.38	33.88	26.21	21.56	20.11	15.76	29.33	25.92	26.77
ncbi_101774375	--	6.38	1.86	3.38	8.81	10.34	9.35	6.44	4.58	3.97	8.5	7.01	8.58
ncbi_101774591	DMT105	0.4	0.37	0.43	0.67	0.82	0.66	0.75	0.43	0.32	0.55	0.59	0.69
ncbi_101774663	HAK14	5.87	4.67	5.94	8.42	8.77	8.65	6.51	7.41	8.3	7.59	9.46	7.36
ncbi_101774775	CNX2	14.16	12.41	17.68	30.92	31.63	27.24	21.24	19.74	18.36	31.12	34.09	25.61
ncbi_101774778	--	19.42	13.97	16.57	36.29	41.73	33.72	20.62	15.03	14.95	22.05	21.76	27.29
ncbi_101774823	AAE5	25.7	12.72	14.96	55.57	60.83	47.09	26.59	19	18.33	44.15	41.71	51.64
ncbi_101774982	At1g22040	8.03	6.24	6.76	20.67	22.39	19.32	20.43	11.89	9.97	15.31	18	16.14
ncbi_101775009	FYPP	55.17	57.65	65.37	88.79	87.6	86.05	71.41	65.66	61.98	81.36	69.7	75.86
ncbi_101775248	UGT83A1	0.57	1.04	0.51	0.36	0.36	0.26	0.49	0.55	0.49	0.27	0.42	0.57
ncbi_101775672	D14	26.8	28.21	31.21	67.75	105.36	82.29	43.23	53.18	46.28	46.15	54.05	57.46
ncbi_101775678	Os03g0326500	0.1	0.33	0.59	2.09	3.75	3.39	0.8	0.4	0.99	1.56	1.71	2.25
ncbi_101775830	Os01g0789100	1.65	1.63	2.55	4.12	6.33	6.38	3.86	5.06	4.57	4.28	5.12	3.72
ncbi_101776119	--	6.38	5.87	8.49	8.64	12.53	9.07	7.88	7.72	6.47	12.23	9.05	8.77
ncbi_101776234	--	1.57	1.48	2.86	2.29	4.25	3.94	2.36	2.55	2.46	2.18	1.99	2.67
ncbi_101776277	IRL4	6.48	5.44	7.55	7.7	10.65	11.3	5.83	6.28	5.85	9.4	12.25	9.55
ncbi_101776339	--	2.64	2.71	4.83	3.78	7.04	4.51	3.56	4.4	3.96	3.65	3.94	4.75
ncbi_101776355	SAC2	101.68	82.38	121.74	205.67	210.36	176.72	189.9	147.54	134.43	161.97	164.69	157.9
ncbi_101776479	MRS2-B	19.82	18.26	22.77	20.38	26.87	24.5	17.3	18.67	17.16	20.77	20.88	22.27
ncbi_101776610	--	4.06	2.71	3.24	4.98	6.37	4.23	3.48	4.31	3.89	5.11	4.24	4.21
ncbi_101776685	ycf20	29.59	24.55	25.38	64.2	79.07	53.62	31.57	44.49	32.61	66.59	59.27	64.92
ncbi_101776856	PLDZETA1	12.84	9.67	14.25	14.75	18.27	16.67	11.96	13.74	12.55	17.95	16.82	12.58
ncbi_101776924	--	7.76	4.48	6.08	13.67	14.53	13.25	7.67	8.54	9.03	10.87	10.14	12.06
ncbi_101776937	PUP11	4.58	4.33	3.89	5.76	6.58	6.71	5.05	4.1	3.84	5.28	5.05	5.48
ncbi_101777560	ATG16	3.73	3.57	4.17	4.06	8.27	5.76	4.43	4.44	4.56	6.33	4.28	4.7
ncbi_101777573	--	489.84	471.8	296.15	361.62	241.79	390.02	466.3	396.84	322.3	364.52	339.86	391.39
ncbi_101777607	TCP20	5.58	2.87	5.54	8.02	13.37	11.3	8.28	8.28	6.62	8.1	7.58	9.2
ncbi_101777630	AAP6	1.81	1.92	1.46	8.94	11.37	6.4	3.63	6.4	7.46	4.88	4.53	4.12
ncbi_101777960	--	3.06	1.68	3.33	3.53	5.32	3.98	3.58	3.84	3.22	4.61	3.89	4.07
ncbi_101777977	STY13	16.38	18.37	19.57	18.07	32.71	28.01	22.08	22.92	23.77	17.37	18.79	21.2
ncbi_101778086	STY46	4.36	4.71	5.22	10.59	14.3	13.51	5.62	6.85	6.86	8.31	9.72	9.69
ncbi_101778173	XERICO	10.01	6.84	20.05	16.34	36.64	24	28.39	9.58	8.13	22.29	30.2	27.36
ncbi_101778259	--	22.31	11.76	15.88	40.19	34.04	43.11	49.86	18.23	19.06	34.05	34.79	40.33
ncbi_101778277	CKL2	52.33	44.39	61.43	53.7	67.97	63.57	50.65	47.32	49.35	52.13	55.57	57.77
ncbi_101778322	Os04g0499300	48.9	35.44	43.26	72.22	77.12	73.81	46.5	48.28	45.08	60.99	57.92	53.97
ncbi_101778638	JGB	1.04	1.4	1.2	1.68	2.54	3.2	2.37	1.51	1.33	2.07	1.74	2.15
ncbi_101778763	BZIP39	31.42	32.92	22.92	18.26	17.71	20.24	24.01	24.27	22.95	22	26.81	22.96
ncbi_101778884	VPS41	18.07	16.27	17.45	21.61	21.22	19.88	18.78	17.23	19.98	19.53	20.78	18.62
ncbi_101779124	--	1.42	1.77	1.35	1.67	3.41	2.11	1.94	2.33	1.62	1.58	1.53	1.78
ncbi_101779541	--	73.6	57.95	57.92	122.69	104.48	113.8	83.83	61.23	60.92	117.34	98.01	87.25
ncbi_101779561	--	0.66	0.55	1.99	3.29	3.7	4.17	2.74	3.23	2.67	2.39	3.37	2.67
ncbi_101779843	At5g07960	18.28	18.29	29.74	27.01	33.55	35.34	26.49	29.19	22.45	22.71	25.97	29.53
ncbi_101779931	--	10.79	12.14	14.18	15.67	19.12	19.42	14.5	14.44	16.29	15.79	13.29	15.81
ncbi_101780509	Os03g0826400	5.99	4.89	5.26	7.59	8.83	6.67	7.39	6.23	6.92	7.25	6.35	7.27
ncbi_101780640	At3g07870	4.89	4.32	5.16	5.99	8.71	5.64	4.4	4.63	4.21	7.28	6.21	6.2
ncbi_101780734	MKRN	5.74	5.62	5.36	11.17	13.28	11.11	7.53	7.46	7.08	7.39	7.75	8.85
ncbi_101780754	--	15.43	13.44	15.93	24.91	26.78	23.56	16.76	16.44	17.18	19.62	21.12	18.36
ncbi_101780813	CNOT1	2.68	3.57	3.59	1.68	1.74	1.95	2.22	2.35	2.53	3	2	1.96
ncbi_101780845	KCR1	14.9	9.27	13.95	24.71	29.75	26.68	19.58	20.19	15.58	18.13	18.21	19.73
ncbi_101780950	--	0.48	1.05	1	0.3	0.09	0.09	0.51	0.44	0.71	0.19	0.19	0.5
ncbi_101780965	--	20.41	15.89	19.22	28.79	35.37	32.86	25.69	25.36	24.33	24.88	22.93	29.92
ncbi_101781347	--	324.26	317.88	342.1	151.02	130.72	112.55	211.84	271.31	346.29	168.89	196.86	229.96
ncbi_101781602	--	0.98	0.85	1.67	2.16	3.92	2.62	1.33	2.24	2	1.28	3.11	2.05
ncbi_101781630	STY13	21.15	21	22.68	24.8	30.96	26.35	22.19	23.06	26.02	18.87	20.32	23.99
ncbi_101781668	At1g56220	1.05	0.31	1.04	2.18	4.1	2.63	1.45	0.98	1.29	2.29	2.92	2.78
ncbi_101781920	RNFT2	9.26	8.22	10.22	12.54	15.68	13.46	12.84	8.96	8.98	11.33	10.77	10.34
ncbi_101782080	HAK9	12.81	17.21	21.78	20.99	40.24	34.65	11.99	17.87	19.44	27.72	22.66	28.03
ncbi_101782176	--	30.81	25.7	32.93	42.05	50.99	45.1	42.81	36.74	35	42.38	44.39	45.74
ncbi_101782262	GALT6	2.69	2.8	3.56	4.26	5.81	5.16	1.99	4.09	4.35	3.65	4.53	3.27
ncbi_101782436	ZIP10	1.94	2.72	5.53	4.81	8.57	6.02	3.02	1.56	2.84	5.14	3.93	4.04
ncbi_101782531	BASS1	0.49	0.2	0.74	1.05	2.56	0.85	0.51	1.12	0.91	0.38	0.96	0.8
ncbi_101782747	RGA5	3.3	6.23	3.59	7.56	16.11	9.73	4.42	7.94	9.65	3.74	4.99	4.02
ncbi_101782861	--	1.78	1.59	2.56	3.49	5.79	4.59	4.23	3.57	3.36	3.81	3.91	5.06
ncbi_101782929	--	8.96	7.55	10.18	15.79	21.02	19.22	13.29	13.11	10.81	14.17	13.42	11.61
ncbi_101783026	OsI_25444	12.37	7	9.98	15.59	21.07	18.33	16.1	15.94	15.36	14.71	12.94	16.86
ncbi_101783306	RFI2	44.06	38.97	38.43	51.19	52.36	52.61	37.78	37.52	36.08	42.52	39.21	46.06
ncbi_101783369	--	1.08	1.52	1.26	1.87	5.81	3.57	1.77	2.23	3.51	0.39	0.49	1.47
ncbi_101783394	CM1	28.62	27.26	30.92	40.14	43.12	42.43	30.36	31.33	33.63	31.58	37.08	40.68
ncbi_101783600	DNAJB4	6.67	3.59	8.26	7.85	10.17	10.08	6.7	7.29	7.25	7.67	6.73	9.25
ncbi_101784411	AS	116.61	154.22	64.28	86.35	45.45	67.13	112.63	131.59	116.64	74.69	79.11	99.79
ncbi_101784680	VOZ1	8.02	7.94	10.59	13.78	18.74	16.45	10.26	9.93	8.67	13.04	10.97	12.71
ncbi_101784704	Os10g0493600	6.06	8.94	10.03	13.62	21.79	18.29	9.32	14.55	14.32	10.53	12.97	9.2
ncbi_101784712	--	10.55	11.19	12.29	12.28	16.9	11.23	8.89	11.82	12.45	13.23	14.75	11.81
ncbi_101784747	PRA1B2	8.32	6.07	5.66	16.29	17.45	13.1	10.18	11.2	11.09	13.93	12.63	14.66
ncbi_101784871	SMH1	18.31	15.01	19.96	17.68	22.7	19.37	15.25	18.72	16.31	18.74	19.43	19.26
ncbi_101784927	--	0.73	0.47	0.97	1.62	1.8	1.59	1.35	1.46	1.23	1.64	1.4	1.28
ncbi_101785040	PUX8	28.06	23.81	32.01	35.38	42.99	36.82	35.42	31.18	33.97	32.94	32.12	34.78
ncbi_101785195	BAM9	0.69	0.88	0.75	0.55	0.28	0.43	0.66	0.9	0.56	0.62	0.35	0.84
ncbi_101785208	Os04g0665700	10.78	8.98	13.46	11.67	16.73	14.43	11.82	11.3	11.64	13.46	11.43	15.37
ncbi_101785233	PVA11	7.36	8.08	6.61	14.86	17.84	15.33	9.09	10.2	10.07	13.19	11.76	12.99
ncbi_101785276	ARF5	2.1	2.26	4.42	6.12	5.9	6.68	4.61	4.12	5.03	6.56	6.28	4.69
ncbi_101785282	--	2.39	2.72	1.81	4.79	6.36	5.66	2.16	3.58	2.94	5.76	3.73	4.16
ncbi_101785401	Os01g0851400	5.44	6.24	8.61	7.69	10.66	8.96	6.62	7.09	7.13	7.67	7.92	8.39
ncbi_101785536	--	0.13	0.14	0.24	0.38	2.17	1.19	0	0.69	0.6	0.8	0.89	1.45
ncbi_101785539	ERF4	130.2	102.71	162.61	150.3	221.58	182.71	159.28	122.1	139.26	122.66	161.85	201.14
ncbi_101785548	--	2.12	1.54	2.36	2.95	4.35	3.01	3.17	2.7	2.1	2.85	2.07	2.83
ncbi_101785810	COG1	12.77	11.57	16.69	17.72	23.69	20.52	16.98	17.99	16.99	14.63	15.75	16.26
ncbi_101785824	--	14.36	8.93	10.4	17.78	22.78	20.42	10.84	8.97	9.01	14.86	14.85	17.17
ncbi_101785978	SCPL51	7.22	6.28	6.39	12.36	19.92	20.6	13.59	8.79	10.2	9.86	11.55	10.19
ncbi_101786050	--	0.85	0.63	0.96	1.34	1.69	1.35	0.78	1.26	1.08	1	1.78	1.22
ncbi_101786199	PP2C27	8.13	5.17	7.44	8.44	10.37	12.21	9.32	10.78	6.82	9.95	9.14	9.24
ncbi_101786237	--	34.76	39.48	38.14	89.95	124.17	154.94	97.39	45.95	49.89	108.06	121.91	111.96
ncbi_101786257	JOKA2	14.15	13.13	17.69	30.69	32.11	29.56	17.92	15.15	16.01	23.27	20.24	23.58
ncbi_101786314	--	6.68	5.64	6.67	10	14.93	9.51	6.32	7.55	8.64	8.88	9.35	9.63
ncbi_101786404	NAC056	1.48	0.75	1.2	5.29	8.12	6	5.28	2.76	2.06	3.68	4.95	3.48
ncbi_101786453	UBC22	12.26	13.9	14.22	18.2	21.97	17.35	14.63	13.09	14.73	19.12	15.85	17.98
ncbi_101786470	UXT3	13.18	10.27	14.1	15.91	22.78	19.48	17.02	15.93	14.17	14.03	13.16	17.29
ncbi_101786587	TPR3	43.53	50.24	50.92	61.19	61.44	62.75	47.91	50.14	51.72	58.45	56.45	52.56
ncbi_105913464	At5g56450	3.49	2.03	3.71	5.77	9.79	5.5	5.06	5.79	5.08	5.02	7.57	7.79
ncbi_105915088	--	3.27	2.47	3.55	4.19	5.4	5.64	4.49	4.76	3.47	4.71	4.13	4.59
ncbi_111256280	--	0.1	0.77	0.8	0.41	2.63	0.34	0.89	1.55	1.12	0.96	0.05	1
ncbi_111258204	--	10.06	16.12	9.54	2.95	6.42	4.21	6.06	10.02	9.97	4.75	8.27	6.3

## Sheet: MM05
Table S6 Differentially expressed genes within modules 05
Gene id	Symbol	LD-1	LD-2	LD-3	LDCK-1	LDCK-2	LDCK-3	HD-1	HD-2	HD-3	HDCK-1	HDCK-2	HDCK-3
ncbi_101752467	Os10g0544900	9.15	7.46	8.4	11.82	13.7	11.29	9.52	13.07	13.57	10.98	10.76	11.34
ncbi_101752868	sec23a	6.9	7.03	8	7.61	10.12	9.67	10.48	10.02	10.74	8.29	9.61	8.47
ncbi_101752955	--	11.13	7.53	8.74	17.67	16.6	14.96	18.58	18.81	14.33	11.96	13.65	12.85
ncbi_101753107	Os03g0419100	4.66	4.22	10.21	8.75	10.17	8.62	14.6	11	10.59	11.74	10.67	13.56
ncbi_101753130	HSP15.7	0	0	0	0	0.24	0	0.08	0	0.2	0	0.07	0.07
ncbi_101753349	--	3.51	1.84	1.95	5.8	7.16	4.93	8.75	5.72	4.39	6.33	6.55	6.62
ncbi_101753435	ankrd13c	11.14	10.63	13.09	13.78	15.74	14.28	16.94	15.04	13.17	15.31	17.38	16.62
ncbi_101753731	RZ1C	14.37	10.22	20.37	21.18	23.64	23.88	22.81	21.97	20.39	20.7	16.49	21.47
ncbi_101753801	MEKK1	168.31	151.89	105.99	105.15	68.67	82.65	75.75	93.83	93.74	46.56	58.45	50.44
ncbi_101753804	--	5.04	4.29	6.18	6.74	10.52	7.03	10.38	8.64	8.48	9.8	10.46	13.14
ncbi_101753950	At5g49610	0.49	0.42	0.81	1.2	1.69	1.52	1.97	1.66	1.53	1.54	1.81	1.03
ncbi_101754009	--	6.34	4.29	9.04	7.58	8.85	7.93	12.29	10.53	9.46	10.54	11.24	11.19
ncbi_101754090	--	8.07	5.75	7.63	8.85	10.76	11.92	12.69	11.75	11.49	11.24	12.79	12.76
ncbi_101754142	PUX4	41.07	40.49	43.03	51.12	54.75	49.62	70.54	61.09	51.47	56.32	54.07	59.38
ncbi_101754167	TFIIAy	28.09	31.39	31.12	39.73	47.26	45.87	41.42	42.31	39.49	40.54	42.22	55.14
ncbi_101754176	RLCK185	12.3	10.72	12.74	13.4	18.12	16.99	15.49	15.43	15.51	16.88	15.98	18.77
ncbi_101754530	RABA1F	1.46	1.98	1.84	3.56	4.2	3.49	4.3	3.41	2.34	3.52	2.69	2.89
ncbi_101754812	Os04g0452000	27.44	25.22	27.45	28.95	36.9	33.44	39.99	33.49	34.93	32.18	37.86	33.57
ncbi_101754867	CYP18-1	1.96	2.38	2.95	3.28	5.2	4.79	5.19	5.85	3.86	5.48	4.31	5.75
ncbi_101754896	GRXS5	265.72	254.46	237.45	178.25	134.03	212.1	211.1	187.9	146.66	127.97	172.48	164.51
ncbi_101755066	PIP2-1	355.46	331.15	392.68	932.74	742.36	664.18	927.22	826.46	803.32	676.57	656.98	607.53
ncbi_101755132	GIP1	30.37	29.28	31.21	36.09	39.58	37.13	42.26	43.58	39.61	41.7	39.32	41.27
ncbi_101755201	ERF060	198.13	209.87	219.77	247.15	356.11	303.58	374.15	281.76	251.73	276.95	334.54	315.66
ncbi_101755414	--	31.39	18.18	20.46	21.57	7.28	14.01	9.21	12.69	14.27	15.22	18.16	21.11
ncbi_101755455	At3g51280	2.94	2.17	0.59	0.34	0.69	0.46	0.29	0.4	0.26	0.14	0.15	0.65
ncbi_101755591	DSP2	2.7	3.13	3	4.95	4.46	5.05	5.54	5.03	3.49	3.94	4.48	4.18
ncbi_101755622	At5g10620	3.13	4.09	4.69	0.87	1.43	1.15	1.09	2.35	1.88	2.49	2.45	2.49
ncbi_101755703	ufd1	378.75	473.4	244.08	220.97	89.68	245.74	157.81	204.21	208.59	108.57	185.44	104.49
ncbi_101755867	PUB5	88.26	104.02	66.45	57.67	49.52	67.8	28.69	47.64	55.96	44.21	57.33	45.86
ncbi_101756288	--	26.42	33.32	10.62	9.36	11.24	11.53	9.29	12.21	9.65	7.63	5.78	5.66
ncbi_101756609	CDT1A	2.44	2.74	3.8	4.1	5.32	4.15	4.29	4.43	4.52	5.36	4.41	5.31
ncbi_101756624	HDAC1	3.07	3.37	3.09	6.1	6.56	5.91	5.57	5.62	6.2	4.47	5.07	5.96
ncbi_101756706	MEAK7	15.01	11.03	16.12	22.91	28.17	23.61	27.21	25.28	25.21	25.03	25.09	19.94
ncbi_101756856	--	8.55	6.85	8.7	9.85	10.75	10.87	14.2	10.65	11.18	11.51	12.16	10.46
ncbi_101756970	DDB_G0269284	12.25	10.82	15.24	15.57	22.05	16.27	19.11	17.76	15.94	20.78	18.57	20.23
ncbi_101756992	--	1.46	0.67	1.42	1.94	3.4	1.51	2.66	2.19	2.12	2.49	2.85	3.08
ncbi_101757013	SIT2	1.65	0.99	1.41	2.49	3.85	2.19	3.76	2.96	2.95	2.06	3.04	2.84
ncbi_101757024	At2g19130	2.5	1.05	1.61	0.51	0.45	0.52	0.11	0.08	0.31	0.05	0.13	0.07
ncbi_101757028	SHB	1.14	1.18	1.68	2.21	2.87	2	3.45	3.45	3.6	3.23	3.78	3.1
ncbi_101757062	sys1	4.93	3.12	6.17	7	10.23	7.83	11.1	11.9	9.39	9.8	11.31	12.14
ncbi_101757110	KIN14F	0.73	0.85	0.35	0.5	0.1	0.16	0.21	0.43	0.28	0.5	0.17	0.55
ncbi_101757371	HIDM	0.51	0.84	1.24	1.59	5.47	3.36	1.76	4.07	2.47	3.87	2.86	4.03
ncbi_101757430	TULP6	6.02	5.74	8.24	10.93	13.11	12.28	14.17	12.07	12.55	13.47	13.14	11.73
ncbi_101757534	RhGT1	259.23	265.41	137.27	165.65	70.56	115.63	138.21	127.83	120.16	89.76	141.38	96.32
ncbi_101757665	ZSD1	44.83	34.85	38.24	53.28	65.79	61.09	87.09	60.34	51.25	67.39	54.87	75.39
ncbi_101757864	--	5.6	3.4	3.29	2.6	1.31	2.86	1.3	2.14	2.12	0.81	2.49	1.45
ncbi_101758128	GLR3.4	1.68	2.04	2.41	2.23	4.92	4.04	4.54	4.26	4.23	5.78	5.31	6.18
ncbi_101758276	PDV1	1.25	0.88	1.1	2.76	2.18	2.24	2.96	4.07	2.31	3.58	2.55	3.43
ncbi_101758300	PUX8	28.83	25.1	32.6	35.26	38.44	39.34	50.16	39.23	38.68	46.68	49.02	41.56
ncbi_101758315	SKIP2	7.25	5.09	6.63	7.6	8.35	7.48	10.16	7.33	6.81	6.88	8.24	8.02
ncbi_101758554	--	4.83	4.98	5.97	11.9	29.02	14.7	11.96	19.75	16.83	20.53	17.74	28.85
ncbi_101758787	GAM1	2.78	2.42	3.12	3.79	5.12	4	3.91	5.86	5.29	4.16	4.53	4.06
ncbi_101758831	NUA	20.61	22.41	25.7	16.72	17.2	17.13	18.1	15.97	19.55	22.1	17.77	18.48
ncbi_101758973	PCMP-E87	2.46	2.42	1.59	1.77	0.86	1.05	0.35	0.17	0.31	0.49	0.28	0.24
ncbi_101759031	--	3.47	5.4	6.53	14.97	14.88	13.29	16.4	11.46	11.58	12.95	11.07	9.51
ncbi_101759051	URGT5	7.54	5.52	8.11	9.81	11.4	10.35	12.67	14.02	13.48	12.72	12.52	14.98
ncbi_101759135	TCP8	0.66	0.86	0.61	1.23	1.94	0.82	1.15	1.98	1.11	1.16	0.8	1.58
ncbi_101759216	CYP72A14	77.81	72.05	83.14	106.81	191.38	145.73	144.35	165.05	134.23	171.95	155.77	161.16
ncbi_101759226	--	36.05	33.15	41.71	45.16	46.47	44.06	50.29	50.7	50.13	46.22	42.88	43.36
ncbi_101759451	Os09g0127800	15.34	12.68	16.21	19.69	24.52	19.25	20.75	22.54	20.93	19.02	18.93	21.43
ncbi_101759475	CALS3	86.17	122.54	121.4	39.51	43.39	53.28	22.52	48.77	74.44	45.43	64.89	53.07
ncbi_101759489	CFDP1	4.55	3.64	5.45	7.89	7.46	6.93	11	8.93	6.82	7.97	7.33	6.98
ncbi_101759592	At1g02270	15.67	14.3	14.8	19.6	25.98	23.55	21.67	25.47	24.33	24.37	22.11	25.41
ncbi_101759618	At3g09030	0.59	0.99	1.17	2.71	2.97	2.24	2.5	2.8	2.39	3.38	2.58	2.36
ncbi_101759713	PHT4;7	2.15	2.1	3.49	2.54	5.54	3.91	3.21	4.44	5.45	3.71	4.04	2.75
ncbi_101759780	--	4.45	7.88	0.63	2.31	0	1.52	0.3	0.08	0.16	0	0	0
ncbi_101759813	Os07g0577700	46.2	42.82	47.83	55.94	69.86	58.06	67.69	68.03	63.02	57.95	55.47	59.45
ncbi_101759936	HNRNPDL	12.59	12.97	16.15	16.28	16.77	16.53	17.72	16.56	16.74	17.02	17.25	16.9
ncbi_101760049	CHIP	4.69	4.18	8	7.12	9.2	5.4	7.39	6.82	7.52	6.73	7.68	4.87
ncbi_101760108	--	136.79	202.03	106.54	118.1	31.56	42.07	28.43	55.77	31.11	4.34	11.65	5.36
ncbi_101760164	DDB_G0277951	10.08	9.39	16.26	21.42	19.53	18.42	28.39	31.28	23.35	28.18	29.84	27.71
ncbi_101760225	RPN2A	39.2	35.14	40.82	40.91	47.22	41.77	42.89	46.62	45.93	45.95	43.73	43.86
ncbi_101760251	TIP4-2	6.8	4.67	7.89	10.46	16.87	14.2	21.32	11.43	9.19	14.44	16.88	12.89
ncbi_101760264	TRM13	1.29	1.59	1.72	2.7	2.91	3.97	4.5	4.69	3.86	5.72	3.74	4.72
ncbi_101760282	HTR2	0.08	0.17	0.23	0.39	1.26	0.07	1.08	0.42	0.59	0.57	0.87	0.56
ncbi_101760394	At5g23370	4.84	5.29	4.9	9.22	8.5	9.85	6.4	9.2	11.22	8.77	8.69	5.58
ncbi_101760421	RBL20	21.39	19.24	22.33	28.04	30.01	27.29	41.46	35.4	29.85	37.43	39.21	36.54
ncbi_101760500	--	2.13	2.22	2.21	2.76	3.76	3.06	3.38	3.44	3.7	3.18	4.25	4.26
ncbi_101760653	--	1.64	1.46	3.15	2.43	4.51	3.31	5	4.08	3.55	6.1	4.57	4.47
ncbi_101760693	--	2.87	1.41	2.55	3.6	5.05	3.79	3.94	5.14	2.16	3.19	3.9	4.21
ncbi_101760855	CPK4	753.02	970.47	491.2	423.82	311.32	410.84	152.91	247.32	267.3	56.65	56.07	68.95
ncbi_101760941	EXPA7	0.24	0.7	0.47	0.03	0	0	0.05	0.11	0.15	0.29	0	0.2
ncbi_101761071	WRKY21	1.46	0.95	1.68	1.71	3.51	2.75	3.25	2.75	3.04	3.43	3.54	4.17
ncbi_101761078	THIC	39.36	28.77	27.87	11.11	19.28	21.9	17.22	14.22	24.25	16.93	16.97	28.82
ncbi_101761123	XLG3	10.54	10.26	14.58	14.01	17.53	14.77	21.25	17.3	17.37	18.31	15.82	18.22
ncbi_101761128	GLR3.1	1.09	0.96	0.81	0.79	1.89	0.96	1.21	1.38	1.29	1.36	0.69	1.55
ncbi_101761250	--	4.29	5.63	4.8	8.81	10.81	11.93	8.12	11.24	8.9	10.86	8.4	9.12
ncbi_101761255	--	39.99	33.18	47.09	69.01	92.9	80.63	109.15	78.49	75.94	89.33	87.02	100.24
ncbi_101761288	PUX2	6.38	6.6	9.08	8.39	11.4	8.85	12.05	11.12	9.27	11.57	11.18	12.03
ncbi_101761318	Os04g0669600	1.38	1.03	0.92	2.71	2.4	2.04	2.03	3.61	1.61	1.64	1.96	1.64
ncbi_101761338	APX6	4.22	4.29	3.28	2.59	1.27	1.23	2.08	2.1	1.2	1.27	3.69	0.9
ncbi_101761475	--	46.35	40.86	19.33	19.51	5.11	12.54	6.64	3.11	3	2.18	5.25	3.01
ncbi_101761558	STY13	40.27	35.44	40.2	40.46	51.89	49.54	51.62	43.16	45.17	47.34	43.82	48.23
ncbi_101761690	--	6.82	3.44	5.31	12.82	12.96	11.04	17.04	16.3	13.1	11.47	9.42	12.27
ncbi_101761705	SKP1	68.04	67.81	63.37	102.8	90.72	85.7	97.76	95.55	78.91	78.89	78.04	91.7
ncbi_101761745	EXPB6	0.34	2.81	1.13	0	0.4	0.13	0.16	0.21	0.36	0.2	1.63	0.88
ncbi_101761859	SSL3	13.35	8.42	16.57	23.42	27.11	20.92	22.7	23.2	27.13	23.45	16.73	24.14
ncbi_101761964	FLY1	169.9	184.66	154.1	136.51	138.88	124.79	125.8	139.83	139.38	128.71	119.28	110.97
ncbi_101762164	At1g26850	27.52	28.32	31.9	16.78	21.44	20.47	19	21.25	25.05	20.52	22.89	18.15
ncbi_101762209	At5g49980	12.73	9.67	15.66	20.72	44.11	27.44	33.21	29.27	30.86	28.09	27.73	24.46
ncbi_101762401	RRP1B	5.74	6.16	6.85	12.58	13.45	10.54	13.29	12.38	10.28	12.82	10.31	12.83
ncbi_101762407	RWA3	12.06	10.77	14	18.31	20.36	16.04	26.84	18.53	18.02	16.13	15.8	18.42
ncbi_101762449	dapb1	5.46	5.76	6.42	9.9	10.85	10.71	12.92	11.25	8.58	11.14	11.25	10.16
ncbi_101762604	At1g22040	36.55	37.92	36.39	28.37	27.63	26.97	26.28	23.78	24.56	22.44	26.92	21.65
ncbi_101762694	TKL-1	128.1	127.21	117.32	182.23	164.11	176.86	267.24	188.3	201.68	228.07	200.51	231.05
ncbi_101762850	--	1.46	2.1	2.2	2.2	3.09	2.63	2.57	2.54	2.6	2.34	2.67	1.65
ncbi_101762923	--	36.29	42.89	39.23	26.02	29.93	27.01	17.39	25.63	25.13	31.42	29.32	24.74
ncbi_101763100	Sb01g020160	6.7	6.6	7.2	8.74	8.78	8.36	11.42	10.34	7.46	7.96	7.36	9.63
ncbi_101763106	OPR5	242.27	268.99	62.24	146.27	38.86	99.11	21.33	78.72	49.86	13.48	13.9	9.82
ncbi_101763280	--	22.62	18	22.95	17.82	10.66	12.74	7.41	10.68	10.38	4.57	8.21	7.55
ncbi_101763445	SEC13B	18.5	17.03	20.01	22.81	27.46	25.14	22.73	25.97	23.04	25.6	21.93	25.82
ncbi_101763514	AFR	1.66	1.32	1.76	3.42	5.15	3.91	5.08	3.23	3.01	4.57	3.58	3.6
ncbi_101763578	PEX13	147.82	155.44	137	106.68	127.33	121.11	97.67	103.77	103.03	92.13	96.79	108.59
ncbi_101763665	--	10.57	9.49	13.49	15.61	18.52	15.34	13.82	18.73	17.72	16.55	15.37	17.38
ncbi_101763694	Os02g0201900	15.52	15.91	11.06	11.37	8.24	8.84	5.35	7.46	5.64	10.03	7.13	6.73
ncbi_101763772	--	75.47	90.89	111.24	17.88	25.29	41.5	31.92	42.1	33.08	44.63	72.72	70.6
ncbi_101763868	MAEA	12.33	10.69	14.73	15.75	19.46	15.35	17.61	15.2	17.95	19.33	20.22	20.11
ncbi_101763892	yipf1	17.76	17.83	21.73	23.78	26.49	24.48	24.76	27.61	23.96	24.11	25.43	24.7
ncbi_101763972	--	2.71	3.21	4.53	4.63	7.04	5.08	7.05	6.71	6.6	7.63	6.72	6.16
ncbi_101764022	--	34.85	33.37	39.81	41.69	45.51	43.76	44.46	48.57	48.23	51.29	49.52	54.21
ncbi_101764091	--	1.83	0.56	1.93	0	0	0	0	0	0	0.34	1.1	0.13
ncbi_101764132	--	0.91	0.85	1.1	1.79	2.79	1.99	2.78	2.9	1.94	2.89	3.4	2.74
ncbi_101764208	PILS6	32.7	22.57	26	48.85	43.75	39.07	63.49	47.84	35.12	51.32	50.36	39.84
ncbi_101764233	--	0.54	1.34	0.88	0.3	3.88	2.39	2.01	2.47	2.49	1.04	1.07	1.73
ncbi_101764324	APY6	11.48	9.93	9.93	11.9	12.8	11.77	12.82	13.21	12.63	12.51	10.49	11.68
ncbi_101764451	CYP89A2	23.7	26.51	15.93	15.25	16.33	13.19	14.2	13.07	13.59	11.12	16.62	14.88
ncbi_101764726	D14L	43.25	41.44	44.16	66.54	60.45	65.74	80.42	70.63	61.3	68.61	72.76	75.37
ncbi_101764762	WIN1	4.51	4.37	3.1	2.57	1.85	2.85	1.51	1.53	1.8	1.25	1.48	1.47
ncbi_101764831	MHX1	280.62	382.19	366.61	195.64	241.86	264.1	169.55	201.79	258.14	247.15	261.75	218.81
ncbi_101764972	At1g12760	14.91	12.93	17.97	27.75	31.6	31.99	49.21	35.53	28.63	28.69	28.96	28.39
ncbi_101765011	EF1A	141.62	150.84	174.55	273.53	323.25	285.02	291.34	349.77	314.24	254.19	226.33	292.05
ncbi_101765059	REXO4	15.66	16.98	8.06	1.77	2.29	1.69	2.98	5.24	5.94	8.36	9.99	5.71
ncbi_101765164	SAP2	18.79	20.38	17.04	14.83	9.87	10.43	9.72	9.74	6.38	3.92	6.88	3.85
ncbi_101765165	--	15.36	19.45	23.26	23.02	45.22	43.01	67.82	44.68	34.69	31.76	50.46	47.66
ncbi_101765170	CYPRO4	3.45	3.72	4.47	6.99	6.88	5.22	8.91	6.1	6.27	8.9	6.69	6.54
ncbi_101765316	--	15.17	13.53	18.22	17.68	26.48	21.59	27	26.45	27.4	24.38	27.1	31.61
ncbi_101765368	--	2	2.24	3.74	3.18	5.61	4.87	6.88	5.24	5.23	4.68	6.61	4.1
ncbi_101765390	--	2.45	1.28	3.46	7.56	6.71	6.24	5.77	8.56	6.86	7.15	6.16	7.02
ncbi_101765413	FBL10	5.41	5.85	7.19	7.33	10.74	9.7	9.91	11	10.19	11.95	11.91	11.38
ncbi_101765503	LARP6B	9.68	10.58	13.35	11.99	16.88	18.42	17.28	15.68	18.93	13.71	13.85	13.74
ncbi_101765588	BTR1	18.91	15.66	22.22	21.62	25.47	23.88	30.9	30.98	30.56	30.93	28.65	36.81
ncbi_101765824	RPN11	30.52	26.94	33.26	41.82	46.61	37.79	52.94	43.84	37.15	48.35	45.57	42.95
ncbi_101765864	DRP2A	9.12	10.63	11.94	11.49	12.28	12.52	13.49	11.46	13.24	11.2	11.78	11.11
ncbi_101765957	BT1	10.23	11.47	13.75	15.34	19.07	17.49	18.56	22.28	18.74	22.21	21.56	20.27
ncbi_101765968	CKL3	4.26	4.07	8.06	11.51	10.13	8.82	12.05	10.12	10.38	12.71	13.07	8.86
ncbi_101766096	RER1A	7.85	5.67	9.55	9.48	13.03	10.64	14.31	15.16	10.91	16.37	12.73	13.52
ncbi_101766113	ACO1	0.6	1.04	0.6	0.72	0.15	0.04	0.1	0.2	0.17	0.05	0.08	0.05
ncbi_101766155	UVR8	239.05	222.37	165.76	174.47	144.96	152.05	95.87	112.52	111.36	100.89	106.48	99.19
ncbi_101766191	ARAD1	0.81	0.62	1.13	1.06	1.85	1.53	2.1	2.31	2.25	2.33	2.13	2.11
ncbi_101766367	At2g34160	29.77	22.24	29.33	36.37	40.47	36.99	52.18	45.99	41.52	35.79	34.38	40.22
ncbi_101766405	--	9.93	8.13	8.88	10.31	13.26	11.57	13.07	11.57	11.32	12.53	11.81	11.79
ncbi_101766531	EMB8	25.97	28.14	32.46	36.7	40.29	34.68	38.65	42.58	45.56	42.94	42.39	41.65
ncbi_101766811	CML28	32.08	36.61	45.84	48.96	97.28	62.52	65.95	70.5	68.35	45.96	47.25	74.03
ncbi_101766815	--	7.91	6.09	11.13	9.59	17.52	8.67	13.8	13.05	11.86	15.84	14.32	15.39
ncbi_101767102	--	11.61	9.99	11.98	15.05	16.5	15.24	18.22	14.14	15.22	16.42	15.47	15.28
ncbi_101767206	--	5.9	7.82	9.51	13.82	27.29	14.94	19.87	19.24	16.73	16.21	16.44	15.55
ncbi_101767242	At5g26710	14.16	10.72	16.24	18.83	19.2	20.95	22.23	23.02	22.74	24.21	24.57	23.2
ncbi_101767418	NAP1;2	65.49	53.63	64.34	93.14	86.23	85.89	132.72	108.94	98.94	121.19	109.26	113.4
ncbi_101767536	--	9.09	7.52	10.07	10.32	13.3	10.64	13.08	14.7	13.86	13.98	15.14	12.84
ncbi_101767622	MAG5	12.68	12.49	16.19	16.64	19.81	16.78	16.54	14.18	17.45	17.26	17.84	16.16
ncbi_101767764	At5g56140	25.54	19.9	29.96	30.46	39.86	39.01	40.24	30.48	36.5	44.35	39.46	36.45
ncbi_101767818	PSS2	148.28	148.22	101.75	89.65	55.8	63.02	31.46	52.01	64.74	21.81	19.72	22.35
ncbi_101768036	--	10.18	11.82	4.39	1.17	3.31	1.78	1.09	3.03	3.05	0.06	1.09	0.4
ncbi_101768096	APY7	10.26	7.53	10.66	17.31	16.47	14.71	17.48	13.75	13.49	15.18	14.78	16.72
ncbi_101768321	DDR4	26.44	33.24	30.17	21.08	23.76	22.54	22.17	22.93	27.5	26.08	23.82	21.34
ncbi_101768329	--	1.62	1.37	1.21	2.51	3.72	2.58	2.86	3.12	3.3	3.94	3	4.15
ncbi_101768586	HPTG1	14.12	18.89	17.99	17.28	23.65	24.15	23.17	24.91	24.06	15.25	27.06	20.05
ncbi_101768595	At5g02620	1.59	1.37	2.17	3.63	5.89	4.77	2.86	3.86	4.68	4.34	3.1	4.74
ncbi_101768690	SUVR3	7.8	8.02	8.84	6.23	3.89	5.78	3.16	2.95	2.96	2.02	2.84	2.82
ncbi_101768702	EIF4B3	15.74	11.8	15.79	18.21	16.65	17.53	18.9	19.76	18.14	18.41	15.51	16.38
ncbi_101768787	PTPA	3.72	3.26	4.41	5.46	6.25	6.05	8.45	6.33	5.38	7.39	7.02	6.75
ncbi_101768870	TBL34	0.85	0.51	0.87	0.73	0.15	0.09	0.45	0.37	0.2	0.66	0.59	0.17
ncbi_101769097	Os02g0301000	5.72	5.25	8.63	9.26	10.24	7.83	9.37	8.91	7.56	6.92	8.03	8.55
ncbi_101769235	SAP30BP	9.19	6.67	10.49	10.84	13.98	13.7	16.19	13.78	12.58	13.03	12.02	13.73
ncbi_101769240	SYN4	36.95	34.28	39.69	35.57	44.98	46.77	44.85	44.04	41.94	47.57	45.42	45.05
ncbi_101769354	RVE8	2.68	2.99	1.72	2.09	1.27	0.93	0.41	0.59	0.85	0.22	0.49	0.21
ncbi_101769450	At1g80120	1.87	2.35	2.42	4.14	10.13	7.12	9.42	5.9	6.15	9.11	9.47	9.57
ncbi_101769482	HSP70-16	3.94	4.27	5.89	6.02	7.95	8.22	8.21	8.65	8.25	9.17	8.98	7.87
ncbi_101769615	SUD1	62.72	71.03	58.85	55.99	56.21	49.46	43.91	46.41	50.73	47.05	44.94	45.71
ncbi_101769685	At2g19130	5.08	2.92	5	6.87	8.27	6.3	11.98	7.86	5.83	9.48	9.79	10.11
ncbi_101769716	--	11.44	9.5	10.6	7.41	7.74	8.63	7.56	7.92	8.62	7.77	7.04	5.5
ncbi_101769858	OBF1	12.86	10.69	13.28	28.54	33.19	31.13	23.85	27.15	35.54	33.73	30.82	35.34
ncbi_101769880	OSK4	18.3	14.48	16.46	29.46	33.34	32.19	54.43	37.84	35.05	39.55	37	29.56
ncbi_101769887	PBL3	7.04	5.54	6.49	12.32	14.48	12.77	19.24	15.64	12.53	14.77	11.44	12.15
ncbi_101769982	--	76.01	72.99	50.09	37.44	37.76	46.38	12.54	20.84	24.29	17.11	17.34	19.42
ncbi_101769995	--	4.17	3.42	4.67	5.98	7.09	5.62	9.84	7.23	7.1	8.21	6.88	7.92
ncbi_101770090	--	1.93	2.13	2.29	2.89	3.84	3.79	3.2	4.18	4.06	3.09	3.79	4.18
ncbi_101770129	AZF2	32.59	58.21	75.67	73.36	76.23	131.87	130.75	84.03	55.57	76.39	104.18	91.54
ncbi_101770140	WAK4	1.02	1.38	1.11	2.63	3.22	3.3	5.05	3.2	2.94	2.7	3.08	2.63
ncbi_101770231	OsI_18576	8.09	7.2	10.72	9.95	13.07	11.21	11.73	12.45	13.43	12.32	14.08	15.5
ncbi_101770322	--	16.25	13.69	20.08	19.48	26.72	23.91	27.05	26.47	23.87	22.06	22.65	23.46
ncbi_101770354	TDC2	13.89	10.86	12.6	6.33	6.93	7.12	5.73	7.41	7.71	8.59	8.16	9.34
ncbi_101770547	DURF2	85.35	78.94	36.57	46.03	18.63	37.05	16.98	19.2	17.41	15.33	13.11	12.92
ncbi_101770605	--	0.43	1.05	0.39	0.44	0.27	0	0	0.28	0.4	0	0.1	0
ncbi_101770870	PEX16	17.33	16.63	20.69	24.25	26.15	24.49	31.28	21.06	24.78	28.72	27.44	24.9
ncbi_101770979	coq10b-a	111.48	99.77	69.74	70.75	37.86	57.22	28.04	42.07	42.35	14.14	25.42	25.33
ncbi_101771314	--	0.7	0.79	1.31	0.33	0.14	0.14	0.18	0.4	0.34	0.64	0.52	0.23
ncbi_101771503	--	3.4	2.79	3.1	4.98	6.36	5.09	5.54	4.91	7.53	5.69	5.52	6.03
ncbi_101771928	RF45	3.6	5.31	7.28	6.45	12.87	10.72	8.86	11.06	9.21	11.4	11.4	12.08
ncbi_101772100	ROC4	71.11	69.51	46.9	17.73	15.55	21.1	13.21	21.88	26.9	1.79	4.56	2.19
ncbi_101772580	ERF019	6.29	6.58	2.08	1.97	0.95	1.44	0.13	1.2	1.74	0	0.05	0.17
ncbi_101772733	RBP47	28.58	23.16	24.04	58.37	52.15	49.18	51.3	64.42	49.63	39.72	38.27	47.59
ncbi_101772818	--	75.44	51.3	56.15	70.09	87.46	67.89	72.95	77.21	73.18	77.76	60.54	66.09
ncbi_101773210	QSOX1	34.09	31.39	33.97	36.12	41.5	41.3	47.75	42.87	39.23	38.96	39.63	36.5
ncbi_101773374	At4g17486	5.41	4.7	7.15	7.31	11.21	8.73	11.58	12.22	11.6	12.22	14.19	14.69
ncbi_101773442	Os07g0660400	1.23	1.12	2	1.52	2.85	2.13	2.55	2.41	2.61	2.09	2.19	1.96
ncbi_101773461	OsI_35671	31.68	33.69	35.19	34.99	53.29	43.52	46.48	45.74	42.73	44.53	40.52	52
ncbi_101773480	PSB27-2	4.79	3.51	5.31	6.33	6.42	8.13	10.07	7.74	6.73	5.74	5.68	6.57
ncbi_101773590	FOLB1	0.24	0.9	0.86	0.56	1.83	1.78	2.54	2.23	1.58	1.46	1.34	1.43
ncbi_101773598	--	4.57	4.27	5.66	5.59	8.66	7.12	6.8	6.97	6.51	7.48	6.54	7.1
ncbi_101773666	mpv17	5.4	4.45	5.94	7.69	11.1	10.76	18.37	12.16	11.42	12.18	10.17	13.15
ncbi_101773696	--	3.36	2.99	4.2	4.5	5.19	4.82	6.57	6.03	5.14	6.73	5.82	6.11
ncbi_101773758	--	1.41	1.08	1.89	2.53	4.14	2.94	4.83	3.17	3.06	4.53	4.56	3.59
ncbi_101773775	FLK	12.79	11.32	16.6	17.65	19.42	14.7	17.87	17.4	17.57	14.78	13.71	20.52
ncbi_101773875	RPA1C	0.43	0.5	0.76	1.47	2.01	1.17	2.26	1.61	1.43	1.88	1.72	1.59
ncbi_101773949	At1g48100	0.65	0.77	0.97	0.05	0.38	0.84	0.4	0.34	0.63	0.73	0.41	0.42
ncbi_101774088	--	2.14	2.07	2.55	1.26	0.91	1.21	0.69	0.8	0.4	1.12	1.4	1.37
ncbi_101774216	KLCR1	6.31	4.87	8.36	8.73	10.7	9.88	13.53	10.22	11.25	11.41	11.49	10.5
ncbi_101774402	CYCT1_2	64.9	71.31	69.35	47.3	51.05	53.15	47.64	53.56	55.48	57.37	64.3	51.38
ncbi_101774405	BZIP60	102.33	109.11	74.42	81.38	46.32	63.86	51.27	51.01	47.03	35.05	45.59	38.02
ncbi_101774500	CYP71D55	0.34	0.47	0.68	0.95	2.07	1.89	2.45	1.25	1.41	1.31	1.19	1.28
ncbi_101774580	-	1.08	1.74	1.89	2.14	3.81	2.58	3	3.42	4.2	3.17	2.06	2.44
ncbi_101774868	LARP1B	1.94	2.59	2.13	5.91	6.03	4.27	6.79	4.3	4.55	5.24	4.14	4.05
ncbi_101775194	SIT2	1.3	1.83	1.9	2.87	6.02	4.03	7.87	5.32	3.23	4.97	3.72	4.37
ncbi_101775361	drap1	38.02	27.3	42.45	46.05	55.23	50.98	74.73	51.1	52.72	62.73	57.99	57.48
ncbi_101775395	PBE1	44.62	40.6	51.43	53.79	59.61	51.2	68.24	66.83	70.81	68.38	64.57	73.08
ncbi_101775418	SDP1	27.92	28.53	29.01	21.83	22.24	21.47	13.94	17.11	17.66	19.51	18.92	16.47
ncbi_101775542	At2g46620	1.41	1.73	2.3	4.11	3.34	3.78	4.4	4.07	3.42	3.24	3.69	3.93
ncbi_101775810	--	101.43	83.57	124.6	140.06	233.83	231.18	284.04	173.62	157.31	211.25	168.6	208.24
ncbi_101775823	--	5.59	5.81	4.11	8.92	8.29	7.95	9.12	8.4	8.59	7.6	6.52	6.95
ncbi_101775891	SDE5	1.01	0.56	0.68	0.36	0.14	0.24	0.06	0.02	0.18	0.08	0.12	0.03
ncbi_101775947	RANBP1C	38.36	34.02	42.44	48.89	48.31	51.72	63.87	51.01	55.29	48.44	43.6	55.19
ncbi_101775978	LRK10	22.36	21.48	7.75	3.57	8.02	9.76	4.84	7.8	4.04	0.43	0.99	0.45
ncbi_101776013	PAT07	13.17	11.08	14.16	15.14	19.39	17.16	23.61	21.63	17.89	18.47	16.98	19.19
ncbi_101776326	PRL1-IFG	2.29	1.66	1.89	3.43	4.29	4	5.19	5.46	6.4	5.58	5.69	5.42
ncbi_101776390	PAT10	12.42	11.94	19.28	16.24	21.88	18.35	21.47	17.31	19.82	14.78	17.51	19.45
ncbi_101776508	EXO70A3	7.75	6.9	6.11	2.92	2.97	3.26	1.8	3.18	2.42	1.34	1.09	2.37
ncbi_101776555	ROH1	71.21	84.62	58.14	30.85	31.01	53.54	10.85	18.21	19.59	9.45	10.94	16.34
ncbi_101776812	KCR1	2.85	2.5	3.22	5.92	6.21	5.63	7.31	6	4.31	4.92	5.19	5.96
ncbi_101776844	SD113	29.51	23.42	13.6	9.47	11.21	10.92	7.7	9.66	9.28	3.35	4.71	4
ncbi_101776860	CBP60B	486.35	533.93	240.67	157.03	107.25	160.88	20.3	55.81	81.47	4.4	14.91	8.32
ncbi_101776874	HOX15	5.26	5.28	3.05	13.33	16.42	13.96	26.6	13.87	10.64	21.38	21.16	21.25
ncbi_101776912	--	23.78	28.62	25.13	12.95	17.9	14.46	8.61	10.66	15.06	20.63	20.56	20.09
ncbi_101776975	TULP14	62.11	66.64	56.08	46.66	48.9	47.17	50.08	49.72	46.3	41.72	45.23	43.9
ncbi_101777013	--	3.49	1.39	3.11	3.99	4.89	3.98	5.91	4.41	4.67	3.72	4.37	4.1
ncbi_101777014	BC10	1.08	0.86	0.84	2	2.4	1.66	3.21	1.61	1.96	1.39	1.08	2.14
ncbi_101777169	CCDC124	17.5	29.26	12.38	11.92	8.27	6.97	13.21	13.62	11.9	17.91	12.52	15.34
ncbi_101777275	--	131.5	130.93	77.98	101.46	54.23	53.05	69.2	62.63	30.12	136.95	66.15	57.42
ncbi_101777316	At5g45910	1.5	3.61	2.05	0.44	0.53	0.87	0.2	0.37	1.39	1.14	0.33	2.73
ncbi_101777569	RHB1A	14.24	11.7	15.24	19.99	20.21	17.46	22.3	20.24	20.46	20.28	19.14	23.31
ncbi_101777711	--	7.45	5.21	9.73	11.51	13.06	10.05	16.94	15.18	12.57	12.13	10.78	13.16
ncbi_101777792	TRRAP	20.29	22.89	22.6	14.42	16.59	16.32	14.41	17.82	18.29	20.09	18.87	15.69
ncbi_101777849	COI2	13.79	12.69	13.08	18.31	18.34	18.64	23.55	20.9	17.74	17.13	18.14	19.59
ncbi_101777921	--	19.25	19.95	16.67	27.75	30.41	29.73	28.9	26.07	30.07	28.66	31.87	35.87
ncbi_101777940	PAP22	70.54	87.42	89.9	44.25	30.95	37.77	20.18	34.55	43.36	50.99	66.86	58.59
ncbi_101778042	GME-1	11.98	11.91	15.25	24.53	28.14	22.71	33.15	31.65	34.37	36.89	33.69	34.78
ncbi_101778101	RPN5A	66.01	58.76	70.82	69.84	76.45	70.64	79.44	80.24	82.06	80.62	77.15	84.64
ncbi_101778297	ARP1	5.09	3.97	5.07	6.07	7.58	7.07	8.18	8.63	8.09	8.58	8.96	7.46
ncbi_101778515	ALKBH9B	10.06	10.47	14.38	14.47	16.76	14.08	15.67	14.7	14.34	15.17	15.82	15.92
ncbi_101778641	SD18	10.26	14.02	6.75	9.63	4.92	5.63	1.46	3.76	4.13	1.06	1.1	1.46
ncbi_101778658	DGAT1-2	7.29	7.29	5.07	4.34	2.97	4.82	2.84	2.91	2.61	1.75	2.91	2.35
ncbi_101778758	RLT1	32.77	32.82	30.45	21.54	23.1	19.93	18.19	18.51	21.87	25.09	24.73	17.75
ncbi_101778818	--	22.32	16.9	22.11	28.66	35.01	40.71	46.21	31.15	32.56	30.38	27.81	25.07
ncbi_101778835	--	9.23	6.26	9.79	10.91	13.91	14.17	13.49	11.08	12.11	10.76	12.13	15.31
ncbi_101778854	--	2.69	2.06	3.52	5.3	5.95	3.68	4.37	5.85	5.63	4.96	6.31	5.83
ncbi_101778880	UBA2	33.89	30.19	36	45.31	50.53	42.85	48.39	46.95	49.1	48.4	48.3	47.63
ncbi_101779005	MUB4	31.5	27.35	35.52	41.7	46.03	47.35	48.16	43.2	39.47	46.54	48.66	52.59
ncbi_101779040	--	4.49	3.4	4.63	7.69	9.67	9.78	13.31	8.83	7.96	8.99	6.63	6.67
ncbi_101779364	BAT1	13.23	10.47	13.81	16.09	21.62	20.97	29.91	16.42	15.48	19.1	17.25	18.22
ncbi_101779476	Os06g0563300	15.94	12.73	15.22	17	19.8	20.81	18.02	18.65	21.35	21.59	21.06	19.58
ncbi_101779516	RPN12A	21.1	15.27	24.66	28.03	32.85	26.17	35.65	32.65	28.32	29.82	30.46	36.52
ncbi_101779642	-	1.71	1.7	1.62	2.13	3.14	2.08	3.35	2.17	2.35	2.28	1.66	2.3
ncbi_101779824	--	13.84	13.55	16.91	15.72	21.86	19.32	19.58	18.64	19.25	17.98	19.79	17.91
ncbi_101780256	TUBB7	23.16	19.55	28.16	39.08	47.26	40.3	62.19	50.63	48.68	50.52	49.01	61.04
ncbi_101780267	--	140.62	149.24	67.46	64.99	50.21	99.62	43.25	35.89	33.8	15.1	30.76	30.62
ncbi_101780377	-	16.51	20.13	19.56	13.93	15.34	16.98	12.95	13.47	15.89	16.21	15.83	13.45
ncbi_101780399	--	8.68	6.88	10.13	10.66	15.49	12.7	15.1	15	15.53	15.2	13.46	16.55
ncbi_101780469	UBA2B	11.72	9.73	13.04	14.63	15.89	14.43	16.03	17.06	17.37	15.19	15.13	14.67
ncbi_101780636	NET4A	3.69	2.55	3.65	3.01	0.93	1.33	0.93	1.64	2.06	0.77	2.03	1.06
ncbi_101780835	LCV1	4.7	4.64	7.27	6.94	11.13	10.56	9.31	8.26	10.37	9.74	11.18	10.71
ncbi_101780838	AVP1	18.95	22.85	18.66	29.24	32.19	31.7	32.7	31.38	29.61	31.27	32.7	28.79
ncbi_101780899	--	3.47	2.53	4.06	4.88	6.07	6.01	8.37	6.46	4.66	5.67	5.72	6.06
ncbi_101781052	--	0.37	1.16	0.55	1.51	3.81	1.72	1.82	2.53	3.79	1.66	3.82	0.74
ncbi_101781096	PTI1	37.66	34.59	43.16	46.21	53.26	50.33	68.62	54.79	51.4	53.19	54.34	55.65
ncbi_101781154	OsI_17385	24.18	24.33	30.21	43.44	42.6	38.49	56.45	39.84	48.58	44.69	37.4	39.78
ncbi_101781286	RLP6	0.52	1.02	0.38	0.13	0.13	0.27	0	0	0.19	0	0.1	0
ncbi_101781369	LPP2	46.74	56.81	30.06	17.81	17.63	12.49	5.76	12.93	10.34	1.54	2.63	0.87
ncbi_101781524	Os08g0135800	6.51	5.8	7.56	7.1	10.16	8.97	10.36	10.94	9.6	10.66	10.5	10.33
ncbi_101781540	RGA4	2.69	2.26	3.44	3.96	10.38	7.17	9.15	8.32	6.86	9.56	6.61	9.3
ncbi_101781596	SCE1	73.19	78.04	72.75	82.16	88	84.05	87.85	89.51	86.1	85.03	83.35	94.43
ncbi_101781663	FCA	15.48	13.97	16.49	18.9	18.63	16.83	19.77	18.56	17.9	16.16	18.49	17.22
ncbi_101781761	ECR	25.13	20.68	22.79	36.61	41.61	42.94	39.61	44.35	39.2	44.37	39.9	59.8
ncbi_101781776	ARF1	104.12	101.69	107.65	125.46	122.42	123.55	119.19	121.25	129.19	115.64	121.85	122.98
ncbi_101781812	UBC5A	13.28	16	20.34	21.9	24.93	23.27	33.91	24.37	27.91	22.58	22.05	28.15
ncbi_101781910	XA21	47.21	38.47	51.62	12.22	9.04	24.55	16.67	23.01	24.55	8.34	26.75	20.1
ncbi_101781929	--	15.66	20.11	15.89	11.62	11.5	11.21	8.53	10.85	8.52	7.73	8.83	8.53
ncbi_101781983	CXE15	17.08	23.58	18.25	6.17	11.04	4.89	4.62	7.2	8.66	0.83	3.81	2.29
ncbi_101781993	BZIP19	15.41	13.72	17.18	21.04	27.44	22.48	27.24	21.81	20.87	23.98	19.14	25.66
ncbi_101782124	MAP1A	28.46	27.35	30.99	30.79	32.83	32.49	38.82	35.88	32.93	34.33	33.03	33.1
ncbi_101782175	RPRD1A	5.5	6.41	7.28	7.61	10.56	9.15	11.2	11.42	11.04	12.52	10.99	13.31
ncbi_101782264	--	0.28	0.26	0.29	1.06	1.4	0.28	1.31	0.81	0.93	1.24	1.65	1.38
ncbi_101782282	B120	0.75	1.62	1.14	0.58	0.77	1.07	0.6	0.66	0.78	0.68	0.93	1.45
ncbi_101782484	JMJ25	12.21	11.35	13.3	11.18	11.21	10.36	9.59	9.21	12.55	10.68	11.79	10.02
ncbi_101782695	SWEETIE	9.38	10.61	11.61	6.92	7.32	8.68	7.54	7.71	8.97	9.03	9.66	7.93
ncbi_101782905	RGA1	0.84	0.56	0.71	1.22	1.5	1.51	1.85	1.48	1.13	1.66	1.9	1.08
ncbi_101782964	ARID2	42.31	48.78	57.1	28.44	31.92	36.92	31.43	34.35	30.88	38.86	35.55	33.38
ncbi_101783004	WNK4	4.87	6.09	8.22	7.34	10.64	9.73	11.39	10.8	13.21	9.38	10.25	8.81
ncbi_101783112	--	1.34	1.27	2.25	3.11	4.15	2.93	5.59	5.01	4.02	4.04	6.34	6.26
ncbi_101783128	BHLH168	2.05	2.01	1.95	0.16	0.04	0.21	0.28	0.5	0.36	0.69	1.65	0.67
ncbi_101783383	Os10g0205300	23.73	30.52	15.56	9.97	12.18	9.82	5.5	7.06	5.01	1.29	2.21	1.2
ncbi_101783401	GRP-2	14.32	12.2	15.3	22.29	24.69	20.69	23.16	24.92	21.09	21.42	19.74	23.32
ncbi_101783408	APC8	0.82	0.93	1.33	1.13	1.97	1.4	1.94	2.02	2.09	1.95	1.95	2.71
ncbi_101783494	--	16.4	15.66	16.41	12.67	13.67	13	10.79	13.08	13.18	11.69	12.62	11.46
ncbi_101783495	--	3.85	3.98	4.26	5.63	6.04	6.1	5.74	5.59	6.48	5.78	5.69	6.83
ncbi_101783619	--	1.17	1.04	1.93	3.33	4.71	2.64	6.23	4.54	4.19	4.3	4.18	4.73
ncbi_101783661	--	13.94	9.62	15.52	16.35	18.18	15.52	16.21	19.45	18.45	17.63	16.14	18.94
ncbi_101783746	--	4.04	1.9	3.31	3.22	5.24	7.55	7.82	7.17	5.72	4.92	4.72	6.61
ncbi_101783748	POD1	5.3	4.38	4.94	5.96	6.63	6.56	7.64	6.8	5.64	7.14	6.33	6.54
ncbi_101783956	DGK4	0.76	0.94	1.25	1.37	1.86	1.11	2.07	1.12	1.1	1.55	1.12	1.41
ncbi_101783980	WNK1	16.9	15.6	17.07	24.08	34.74	27.66	30.93	27.96	37.07	27.98	28.87	33.56
ncbi_101784168	--	10.33	6.99	7.52	19.01	25.98	21.77	30.73	17.39	8.5	22	17.74	25.63
ncbi_101784211	PRP31	13.14	13.04	17.19	18.11	21.58	17.83	19.72	20.67	20.77	21.35	18.96	23.79
ncbi_101784227	--	11.79	6.38	12.72	11.94	15.92	14.51	17.82	17.52	14.51	15.79	14.09	13.65
ncbi_101784272	XCP2	2.79	5.13	2.5	0.32	1.35	0.15	0.68	0.56	1.39	0.09	0.08	0.17
ncbi_101784322	ARL8A	11	7.88	10.58	14.02	15.91	16.48	21.23	18.13	18.06	19.01	19.91	23.84
ncbi_101784538	--	1.1	1.41	2.09	2.76	2.86	2.5	4.92	3.27	3.62	4.59	3.68	3.58
ncbi_101784620	--	1.25	0.41	1.22	1.38	1.98	2.26	2.26	2.18	1.91	1.84	1.43	1.69
ncbi_101784654	UBA3	1.1	0.97	1.13	3.5	3.63	2.86	3.2	3.47	3.43	2.87	2.63	3.49
ncbi_101784820	At1g76660	5.02	3.98	5.53	6.43	11.12	7.36	9.02	8.55	8.01	9.87	8.89	9.05
ncbi_101784839	ALAAT2	4.99	3.38	3.37	1.62	0.71	1	0.12	0.5	0.69	0.22	0.2	0.11
ncbi_101784960	--	1.96	2.28	4.06	3.52	6.13	5.87	7.63	7.05	7.64	7.74	6.5	8.16
ncbi_101784975	--	1.61	1.81	2.82	3.42	4.33	2.87	2.2	3.91	3.21	3.19	3.41	2.58
ncbi_101784986	AAE20	80.76	91.26	49.22	15.81	18.59	17.69	22.65	31.74	21.46	5.49	18.28	7.77
ncbi_101785185	PIP1-1	570.97	364.86	464.94	1226.92	1044.67	809.77	1908.18	1322.03	1092	1497.4	1183.86	1185.75
ncbi_101785305	Os04g0395600	9.14	6.97	11	11.79	22.77	18.2	17.43	20.19	19.07	18.31	22.83	23.69
ncbi_101785485	WAP	3.27	3.77	3.53	4.48	7.68	5.7	6.81	6.21	5.12	5.38	4.86	5.07
ncbi_101785527	LRK10L-1.2	0.85	0.78	0.91	1.15	2.29	2.03	3.14	1.68	1.33	1.4	2.04	2.08
ncbi_101785630	NAC021	11.52	8.35	9.16	40.55	43.17	35.3	46.61	30.91	23.96	31.49	30.33	35.8
ncbi_101785635	--	4.93	5.7	5.62	6.38	7.54	5.58	6.79	6.15	5.91	6.83	5.37	6.75
ncbi_101785669	RTE1	4.6	4.71	6.78	5.16	10.66	8.94	10.55	10.78	9.12	8.16	9.81	7.79
ncbi_101785789	SBT1.5	0.66	0.23	0.24	0.58	1.34	0.99	0.8	1.45	1.27	0.46	1.04	1.05
ncbi_101785797	FBL17	17.22	19.09	23.97	28.36	22.06	23.76	24.44	24.46	23.07	25.12	26.02	23.62
ncbi_101785820	COG4	4.38	4.1	5.6	6.3	8.71	5.86	8.77	8.34	8.12	8.22	7.76	7.19
ncbi_101785875	--	20.82	22.11	15.88	15.2	9.95	6.37	9.09	9.61	6.69	3.2	4.66	2.69
ncbi_101785953	RR24	32.47	25.39	25.47	46.74	41.91	36.05	52.2	41.47	37.03	41.53	35.49	39.64
ncbi_101786120	AKR2A	14.51	16.18	20.09	18.99	21.84	20.82	23.36	20.66	21.64	24.45	21.54	23.82
ncbi_101786179	--	2.08	1.51	3.45	2.58	4.01	2.68	3.6	3.09	4.02	2.68	3.35	3.55
ncbi_101786221	At1g31730	9.75	6.84	9.57	11.71	15.52	12.06	12.99	12.87	12.83	14.98	14.23	15.07
ncbi_101786368	--	3.4	2.31	3.3	4.98	4.36	5.89	5.42	6.89	4.3	4.56	4.57	5.49
ncbi_101786382	AHL10	5.85	4.79	10.36	7.92	11.3	8.99	11.63	10.82	8.93	10.39	11.53	10.41
ncbi_101786400	OsI_17065	7.46	8.34	8.53	14.36	15.81	13.43	18.07	15.76	12.74	15.77	12.62	12.42
ncbi_101786624	MICU	21.26	27.78	23.97	22.69	20.27	16.06	12.31	18.17	17.54	20.36	21.36	21.54
ncbi_101786845	At4g20820	0.18	0.25	0.45	0.7	0.85	0.58	0.89	1	0.43	1.14	0.67	1.18
ncbi_105913598	--	7.53	8.52	9.21	5.04	7.32	6.08	6.23	5.26	6.75	9.93	3.82	6.4
ncbi_106804498	Os10g0467600	43.37	27.41	39.69	51.04	50.36	46.44	59.64	58.68	46.54	43.12	45.83	46.9
ncbi_111255688	--	1.63	1.92	1.03	0.06	0.28	0.39	0.29	0.49	0.24	0	0.17	0.07
ncbi_111255946	--	17.05	27.41	23.17	18.87	8.41	15.76	1.89	1.47	2.26	1.78	1.21	2.1
ncbi_111257351	--	35.29	32.78	39.51	7.75	6.91	15.96	9.68	13.44	20.27	7.42	25.49	15.47
ncbi_111257769	--	1.28	1	0.07	0	0	0.16	0	0	0	0	0	0
ncbi_111258039	--	0.04	0.48	1.18	1.82	1.41	1.3	2.59	1.8	1.49	1.82	0.77	1.87

## Sheet: MM06
Table S6 Differentially expressed genes within modules 06
Gene id	Symbol	LD-1	LD-2	LD-3	LDCK-1	LDCK-2	LDCK-3	HD-1	HD-2	HD-3	HDCK-1	HDCK-2	HDCK-3
ncbi_101752572	ATL3	0.75	0.81	2.12	1.72	3.24	1.93	1.47	1.2	1.52	2.53	2.72	4.31
ncbi_101752777	GATA23	4.63	3.38	3.78	8.62	9.34	6.24	7.87	6.7	6.84	15.71	14.52	13.71
ncbi_101752817	EGY1	13.1	11.75	15.55	19.08	22.45	19.05	15.71	17.8	19.37	21.89	23.2	27.47
ncbi_101753178	PTI13	16.83	19.99	21.11	24.79	24.4	23.63	27.12	29.37	28.57	36.03	36.36	35.89
ncbi_101753271	LRK10L-2.5	11.17	12.85	9.56	5.7	6.89	10.53	10.39	9.2	10.51	1	2.32	1.29
ncbi_101753508	--	9.16	9.87	12.78	9.58	13.27	12.02	14.68	12.87	13.72	19	17.66	15.71
ncbi_101753561	SAC2	31.96	29.26	43.48	41.15	40.4	40.36	40.46	36.59	37.85	48.17	46.13	42.62
ncbi_101753592	VIII-2	18.13	19.54	22.53	19.57	24.18	25.68	14.59	16.11	19.62	27.38	29.1	23.73
ncbi_101753641	STIPL1	4.05	4.25	6.47	5.34	6.91	5.04	6.53	7.95	7.53	9.77	9.82	8.99
ncbi_101753656	--	1.5	1.25	1.82	1.3	2.92	1.44	3.19	3.44	3.13	4.61	4.3	4.85
ncbi_101753714	SIS8	15.09	14.54	12.93	15.91	18.66	18.36	16.18	15.91	16.21	20.11	19.71	19.04
ncbi_101753845	PSKR	0.36	0.22	0.44	0.29	1.27	0.64	0.97	0.92	0.67	2.07	1.36	1.48
ncbi_101754088	PAT1	5.76	5.3	7.48	7.39	10.57	11.23	10.85	10.07	9.38	16.19	14.16	14.56
ncbi_101754247	--	3	3.28	5.02	4.54	6.32	5.11	3.33	4.79	4.93	5.32	4.91	5.82
ncbi_101754395	CTR1	12.82	14.14	15.34	13.58	16.59	16.39	15.36	13.72	15.38	18.1	17.66	16.46
ncbi_101754639	RHC1A	15.73	16.86	14.43	14.09	13	13.52	11.64	12.82	13.03	5.83	7.48	7
ncbi_101754766	At3g61800	3.72	2.38	3.95	5.2	5.03	4.14	5.13	4.87	3.82	6.94	5.97	5.44
ncbi_101755030	--	6.23	5.67	8.35	7.99	11.69	8.34	11.55	9.53	10	14.35	13.55	13.33
ncbi_101755221	WAK2	4.84	5.13	2.16	1.35	2.34	3.24	4.47	4.26	2.95	1.31	1.22	2.62
ncbi_101755230	At4g06598	3.9	3.41	4.32	6.91	9.17	6.68	10.34	6.59	7	16.74	13.44	16.59
ncbi_101755257	EIN2	2.06	2.31	4.05	2.64	3.93	5.08	3.14	2.92	3.8	5.3	5.6	4.3
ncbi_101755259	--	2.64	1.93	4.27	4.07	4.91	4.44	5.15	5.37	3.77	6.44	6.47	7.67
ncbi_101755302	--	2.45	1.42	2.73	2.16	4.11	4.18	4.33	2.64	3.04	5.49	6.01	6.26
ncbi_101755865	ROPGAP3	4.38	3.03	4.49	6.65	7.91	7.1	7.74	7.04	3.84	10.98	9.79	10.94
ncbi_101755912	SD25	72.39	77.59	35.46	48.08	30.86	58.16	76.46	70.42	65.16	31.09	29.2	25.79
ncbi_101755959	RPM1	2.15	1.52	2.31	1.85	4.28	3.09	2.81	2.57	2.09	4.63	5.36	3.34
ncbi_101755977	BT3	12.11	14.59	14.87	13.56	28.46	27.43	18.59	17.99	22.61	42.13	37.19	33.4
ncbi_101756295	RUB1	44.28	41.81	45.45	60.08	55.08	55.44	54.78	58.86	52.67	82.41	73.5	74.34
ncbi_101756415	--	0.88	0.5	1.48	1.19	1.18	1.57	0.88	1.26	1.15	1.71	1.5	1.31
ncbi_101756461	VPS35B	25.9	25.85	29.35	29.54	32.63	29	32.31	34.83	32.11	39.18	36.88	38.46
ncbi_101756719	Os05g0131500	1.82	1.21	0.96	1.61	2.14	1.93	0.16	1.79	1.17	1.93	2.71	3.35
ncbi_101756732	PAT16	22.82	18.3	19.57	16.78	17.1	17.49	20.4	16.58	18.35	16.34	15.18	15.98
ncbi_101756825	KAO1	4.16	2.82	2.77	2.79	2.56	2.89	3.04	2.89	4.28	2.09	1.86	2.22
ncbi_101756833	RR9	1.61	0.91	1.79	3.28	4.91	3.2	1.64	3.11	4.19	4.02	3.64	5.49
ncbi_101756871	Os03g0700700	297.28	356.86	344.23	276.27	281.01	230.42	165.6	236.01	282.05	56.65	105.39	90.18
ncbi_101757061	--	15.6	14.75	17.9	15.16	18.64	18.41	13.22	15.61	16.92	18.4	19.73	20
ncbi_101757296	--	554.37	466.57	524.46	424.35	373.77	352.75	505.33	414.07	439.47	354.26	373.85	489.52
ncbi_101757382	APY2	76.85	82.61	58.43	63.93	51.72	53.78	49.35	50.97	45.57	20.8	27.04	23.36
ncbi_101757549	PCMP-E27	0.49	0.57	0.82	0.77	1.09	0.83	0.91	1.11	0.84	1.5	1.45	1.47
ncbi_101757590	CRWN4	18.46	18.33	18.09	21.38	26.57	27.25	17.6	20.84	26.57	30.83	32.33	26.69
ncbi_101757898	--	12.52	11.17	15.09	14.47	19.07	16.42	20.99	16.91	19.07	26.18	25.18	26.15
ncbi_101758055	--	0.67	0.62	1.13	1.13	1.45	1.33	1.92	2.15	1.7	2.79	2.76	2.53
ncbi_101758184	--	3.27	1.91	2.27	3.51	3.87	3.62	1.84	3.02	2.75	3.74	4.03	4.93
ncbi_101758279	LYK5	36.18	35.75	28.04	21.2	19.7	26.7	37.81	26.11	19.13	8.19	23.31	13.75
ncbi_101758288	CRY1	13.99	13.36	18.17	21.52	30.34	27.24	33.27	36.12	34.19	62.01	55.66	61.76
ncbi_101758358	TRAF1A	12.26	11.45	14.2	13.06	17.52	16.62	18.29	18.57	17.81	22.6	23.75	22.3
ncbi_101758497	At2g21120	0.88	0.47	0.96	1.13	2.08	1.79	2.19	2.03	2.2	3.6	3.6	3.16
ncbi_101758784	AAE7	6.76	5.95	5.53	12.99	14.36	14.55	9.8	12.2	12.45	32.3	27.57	27.6
ncbi_101758916	ATG2	11.13	10.03	12.08	9.87	14.2	13.08	11.44	10.19	11.52	19.76	18.15	13.36
ncbi_101758974	WDR26	18.92	17.6	21.39	18.37	24.26	21.46	26.66	25.33	29.95	34.07	33.21	30.4
ncbi_101759038	VIP2	21.34	23	26.78	23.62	26.88	26.07	20.7	23.15	23.17	28.17	24.68	27.04
ncbi_101759068	SE14	2.86	2.41	3.15	3.38	4.66	3.5	4.09	3.97	4.59	6.44	6.35	4.49
ncbi_101759131	NDA1	3.66	3.94	1.6	4.04	1.83	2.22	4.47	3.13	2.89	1.16	1.59	0.88
ncbi_101759212	Os01g0367900	27.12	28.19	33.11	29.56	35.29	32.21	34.8	31.85	34.39	41.6	39.88	36.19
ncbi_101759248	--	1.24	1.04	1.81	1.31	2.38	2.67	2.65	2.3	2.04	3.44	3.34	3.69
ncbi_101759283	--	3.59	3.16	4.7	3.35	4.95	5.52	4.78	5.71	5.13	6.7	8.93	8.3
ncbi_101759515	KCS3	0.2	0.49	0.28	0.8	1.52	1.02	2.02	1.14	0.75	3.41	1.99	2.36
ncbi_101759879	--	2.2	2	3.06	2.33	5.06	2.88	5.06	4.44	4.6	6.76	6.4	6.43
ncbi_101759921	RGA5	1.96	1.96	3.56	2.34	4.21	5.25	1.53	2.44	1.77	7.09	5.21	3.77
ncbi_101760243	At5g05130	0.35	0.24	0.55	0.67	0.78	0.62	0.37	0.43	0.53	1	1.27	0.86
ncbi_101760269	COL16	5.93	4.44	9.24	16.25	38.74	34.6	6.76	12.07	12.65	30.35	24.39	39.53
ncbi_101760423	RUS5	6.58	6.87	6.74	8.36	9.43	9.23	7.98	5.93	6.71	11.63	11.37	11.78
ncbi_101760669	FLK	12.63	11.64	16.6	15.18	17.21	20.09	12.79	13.89	13.71	17.74	16.12	20.25
ncbi_101760806	ZFP1	1.42	0.91	1.42	2.26	3.1	3.89	2.15	2.6	1.72	5.05	4.41	3.8
ncbi_101760839	Mctp1	27.62	30.62	28.64	31.81	38.92	34.19	29.63	31.96	37.92	37.95	40.24	38.43
ncbi_101760935	--	92.68	113.33	78.56	51.95	30.84	24.96	65.36	62.85	35.18	3.86	12.84	6.14
ncbi_101761030	STY46	11.89	13.2	13.55	15.39	16.3	16.63	14.8	13.08	14.89	24.29	22.04	23.02
ncbi_101761035	DOT2	21.39	17.61	24.62	21.77	25.23	25.87	22.32	19.12	23.88	27.96	27.75	26.51
ncbi_101761263	RNJ	9.77	11.49	14.72	9.47	15.08	15.49	8.35	11.05	13.31	17.42	18.35	18.53
ncbi_101761297	At3g17800	12.54	13.43	19.15	17.61	21.83	18.42	22.45	21.3	17.19	31.79	29.82	37.25
ncbi_101761536	--	22.45	21.12	21.97	17.4	11.06	9.49	11.6	15.3	10.01	2.21	1.94	2.08
ncbi_101761634	--	172.76	154.2	128.91	94.13	74.97	120.25	114.81	99.46	89.53	19.9	42.61	44.87
ncbi_101761750	BHLH062	1.92	1.53	2.07	3.79	4.49	4.22	4.81	3.61	2.72	6.95	6	8.4
ncbi_101762105	--	2.07	1.68	2.17	2.44	3.39	2.62	2.95	2.73	2.7	5.25	5.86	4.36
ncbi_101762232	--	4.04	3.11	5.78	4.24	7.12	6.57	8.25	6.02	6.09	11.63	10.59	9.62
ncbi_101762531	--	22.85	22.68	21.16	15.08	13.87	16.34	19.71	21.98	17.76	5.86	11.07	5.46
ncbi_101762638	FPA	30.47	28.46	32.27	29.94	36.41	32.55	32.18	30.65	30.07	42.34	38.26	32.84
ncbi_101762701	CIPK31	72.79	58.3	58.86	91.7	144.3	174.98	182.57	131.29	136.8	260.1	221.59	239.41
ncbi_101762703	SPL11	7.61	7.14	8.95	9.94	13.62	13.06	13.69	12.78	13.53	17.43	16.7	19.28
ncbi_101763004	At3g61590	1.14	0.58	1.13	1.76	2.51	0.98	1.42	1.35	1.34	2.17	2.82	2.48
ncbi_101763127	At1g26850	36.44	42.32	40	30.5	32.03	34.06	28.94	33.73	32.4	18.66	23.05	19.11
ncbi_101763132	LOC_Os07g01090	36.86	34.89	35.28	50.77	61.09	51.48	34.5	47.95	50.61	59.5	57.45	63.83
ncbi_101763230	--	1.18	0.81	0.86	1.86	2.89	1.92	0.79	1.97	0.7	4.34	4.59	5.4
ncbi_101763278	DELTA-ADR	3.34	1.72	2.85	3.45	4.19	3.38	5.31	3.84	3.82	6.75	6.04	5.43
ncbi_101763426	COL16	1.53	1.02	2.15	2.43	5.2	2.79	1.54	2.61	3.15	3.86	4.85	7.04
ncbi_101763753	RNP1	6.32	4.61	7.68	6.7	9.06	6.15	6.28	8.82	8.16	10.08	9.76	8.83
ncbi_101763779	B''DELTA	26.48	21.92	27.84	26.65	34.06	28.88	24.66	27.09	27.26	32.83	30.07	29.82
ncbi_101763805	--	2.88	2.52	3.82	3.4	3.82	3.92	4.34	4.6	4.47	6.08	4.99	5.58
ncbi_101763834	--	0.56	1.07	0.77	1.07	2.16	1.45	0.63	0.27	2.06	1.78	2.2	2.06
ncbi_101764397	FRS9	3.79	3.15	3.82	4.65	5.65	4.66	5.82	6.89	5.49	9.99	8.57	8.35
ncbi_101764538	--	113.31	118.28	163.36	146.68	170.82	173.41	125.8	126.71	152.89	154.46	151.84	180.32
ncbi_101764588	WSS1	3.58	3.3	3.13	4.05	4.68	3.51	2.97	3.29	3.84	3.83	4.53	4.28
ncbi_101764782	--	0.99	1.77	1.2	1.22	1	1.06	0.65	0.96	1.02	0.17	0.18	0.15
ncbi_101764930	CUL3A	11.79	11.87	11.74	12.8	15.92	11.43	14.28	13.75	12.01	18.95	17.85	18.16
ncbi_101764987	--	43.67	33.67	40.21	38.02	36.87	25.12	40.07	38.14	40.4	27.24	24.18	27.45
ncbi_101765294	CYP94B1	2.47	1.52	2.23	5.05	8.22	5.87	4.14	4.96	3.69	10.75	10.24	11.93
ncbi_101765408	OBE3	17.17	17.48	19.79	13.99	20.03	23.34	15.66	17.85	19.52	23.45	23.45	20.82
ncbi_101765513	SPIN1	11.9	14.3	17.99	13.82	18.33	19.44	12.29	14.93	17.66	18.22	21.27	22.79
ncbi_101765719	--	0.47	0.85	0.98	1.76	5.12	5.76	2.67	1.66	0.51	5.03	5.77	2.87
ncbi_101765795	--	0.34	0.14	0.49	0.21	0.73	0.58	0.47	0.33	0.16	1.12	1	0.55
ncbi_101766087	PTB	16.84	16.47	22.13	16.94	23.73	22.34	19.07	17.61	17.49	23.86	19.89	24.64
ncbi_101766114	--	4.1	3.12	5.52	5.25	7.16	5.5	5.56	6.02	4.87	7.7	6.99	7.05
ncbi_101766192	RBOHC	496.02	508.23	494.44	459.36	316.74	410.88	308.54	377.03	410.52	108	216.15	179.01
ncbi_101766283	AGT1	126.23	103.94	141.75	196	225.05	196.19	97.59	106.64	113.12	180.38	172.42	266.26
ncbi_101766555	ECT4	11.43	10.05	12.77	11.13	16.8	12.19	17.45	14.51	15.79	20.37	20.68	19.87
ncbi_101766622	UBQ8	0.54	0.22	0.73	0.96	1.11	0.69	0.75	0.58	0.85	1.71	1.29	0.63
ncbi_101766636	--	7.57	6.04	8	11.57	13.93	13.25	11.48	11.88	11.92	18.4	18.76	20.46
ncbi_101766680	--	5.34	5.52	4.19	23.46	20.2	16.28	9.5	11.48	9.96	26.93	25.78	36.19
ncbi_101767099	--	6.31	4.16	7.09	6.6	13.43	10.62	2.76	6.21	6.12	15.33	10.78	10.85
ncbi_101767130	At5g13770	31.48	19.15	28.87	60.46	66.69	51.92	59.14	41.15	40.69	164.62	120.43	134.71
ncbi_101767323	SR1IP1	12.76	14.36	14.12	20.3	36.59	33.03	14.8	22.24	24.66	28.52	34.18	31.61
ncbi_101767497	CRWN1	26.25	26.08	29.18	32.58	38.13	40.03	45.05	34.17	39.55	64.97	56.07	46.1
ncbi_101767608	UBC23	9.23	9.2	13.08	10.9	14.12	12.63	13.03	12.72	12.4	20.49	18.28	15.73
ncbi_101767717	--	53.1	48.07	55.52	38.33	31.15	37.59	44.15	37.29	33.31	24.33	28.3	27.18
ncbi_101767852	At4g18375	23.99	20.61	28.85	25.77	31.48	28.16	26.13	22.56	26.4	36.29	31.15	33.06
ncbi_101767892	IAN9	40.89	34.2	35.17	44.2	51.15	50.54	31.49	36.99	39.04	51.42	48.96	52.99
ncbi_101767970	BC10	0.5	0.29	0.58	0.92	1.52	0.69	1.03	0.52	0.66	2.73	1.97	1.16
ncbi_101768125	--	65.69	69.07	73.77	56.86	45.32	52.92	61.44	57.9	50.53	31.78	41.19	38.37
ncbi_101768195	SUVH2	3.37	2.56	3.86	5.49	6.81	6.12	5.83	6.2	5.82	8.84	10.14	8.52
ncbi_101768229	UBP25	13.98	15.26	16.98	16.86	20.84	16.92	19.16	18.55	18.56	22.63	23.61	22.34
ncbi_101768254	--	2.18	2.39	3.99	2.99	5.44	3.48	6.81	6.81	4.58	9.17	8.37	10.77
ncbi_101768391	LPPG	36.57	37.08	34.14	26.89	29.82	27.65	23.62	27.36	29.79	13.44	18.52	18.91
ncbi_101768465	spg1	51.9	44.71	52	34.31	28.66	29.17	43.59	34.76	42.89	11.93	21.19	20.61
ncbi_101768581	At3g47420	81.59	69.36	81.98	109.66	156.04	124.21	155.1	91.87	69.17	205.29	133.26	161.67
ncbi_101768670	--	75.42	57.38	51.95	64.01	72.32	83.2	54.74	67.56	64.79	74.68	72.05	84.67
ncbi_101768796	At1g01540	26.4	29.75	58.98	33.54	52.33	55.07	41.61	36.48	28.78	58.36	40.28	59.63
ncbi_101768833	NAC021	0.19	0.52	0.46	0.59	1.8	1.8	1.19	0.97	0.45	1.63	1.32	1.31
ncbi_101768861	PHL11	9.03	6.94	13.46	10.83	16.29	11.8	16.95	11.57	9.71	25.37	24.38	16.82
ncbi_101768898	--	1.56	1.58	2.26	2.49	4.72	4.99	2.74	3.12	3.83	6.64	5.9	6.84
ncbi_101769410	--	1.34	1.11	2.02	2.61	3.88	2.36	3.66	3.31	3.54	6.04	7.12	4.85
ncbi_101769686	AFP-B1	5.35	3.21	7.89	7.02	12.4	8.96	12.74	9.7	10.85	24.12	21.43	22.54
ncbi_101770439	AMSH3	25.55	24.74	25.4	24.5	29.1	27.45	27.35	25.81	25.66	28.97	27.68	27.03
ncbi_101770445	LRK10L-1.2	27.32	19.63	14.1	15.09	13.05	15.77	23.57	18.37	16.91	8.22	16.36	7.06
ncbi_101770521	ILP1	2.95	2.28	3.88	4.04	4.04	3.93	4.7	4.39	3.88	6.9	5.19	5.4
ncbi_101770564	S2P	1.22	1.93	3.3	2.33	3.51	2.94	3.84	4.12	3.82	6.52	5.34	5.16
ncbi_101770600	TDT	13.72	10.29	35.74	29.2	23.42	27.22	27.39	20.73	18.79	28.67	33.07	32.98
ncbi_101770877	B'ETA	24.24	20.68	20.07	24.95	26.36	25.78	20.51	21.46	23.79	31.26	28.57	32.36
ncbi_101770921	MYB36	27.81	27.06	20.95	27.12	17.62	22.39	15.71	15.58	13.24	3.12	8.73	4.91
ncbi_101770954	NIN1	12.16	19.4	29.7	33.72	35.64	35.39	31.67	27.46	26.52	50.76	46.28	45.21
ncbi_101771006	Os08g0536000	42.62	67.45	75.61	108.08	103.86	106.46	119.23	125.97	141.91	259.28	196.82	239.89
ncbi_101771019	TPS9	16.53	17.27	19.36	30.41	35.25	34.46	57.13	30.83	18.68	85.54	77.1	66.12
ncbi_101771020	Dnajb5	3.07	2.39	3.09	2.75	4.58	2.9	3.9	3.76	3.31	6	5.49	4.49
ncbi_101771077	CDF2	12.15	4.88	9	26.3	28.07	24.59	35.75	20.6	18.04	49.31	38.7	52.32
ncbi_101771264	STY13	20.79	23.83	27.67	24.21	31.4	27.38	26.25	26.17	27.56	33.32	30.97	34.02
ncbi_101771881	At5g24010	75.11	87.38	85.52	62.05	69.68	63.28	48.68	70.21	68.56	25.83	37.71	35.54
ncbi_101771921	Gba2	10.89	6	6.34	7.46	6.67	4.84	8.82	7.61	8.44	3.86	5.45	4.88
ncbi_101772108	--	0.65	0.62	0.95	0.83	1.64	0.77	1.12	1.09	1.07	2.22	1.9	1.93
ncbi_101772130	WRKY39	72.51	73	72.8	53.03	62.04	58.93	49.17	67.3	70.12	29.01	43.28	36.17
ncbi_101772169	--	2.24	2	2.72	3.29	4.03	3.3	4.54	4.46	4.05	7.43	5.04	5.71
ncbi_101772217	--	0.46	0.33	0.7	0.82	0.99	1.23	1.25	1.31	1.21	2.99	2.87	2.82
ncbi_101772314	Os08g0237200	36.85	34.76	52.77	67.95	65.14	69.41	72.19	75.09	77.45	102.55	110.18	89.5
ncbi_101772616	TUT4	8.35	7.26	8.04	6.88	9.73	8.74	7.76	7.66	8.48	8.02	9.33	8.71
ncbi_101772663	--	6.31	5.08	6.27	6.84	11.78	10.38	9.56	9.64	9.14	13.33	13.19	13.7
ncbi_101772821	CRK10	1.55	4.23	3.97	1.73	1.49	1.56	4.64	2.89	1.44	0.78	0.67	0.77
ncbi_101772882	PMS1	0.95	0.77	0.98	1.02	1.64	1.06	0.58	1.31	1.83	1.58	1.26	0.99
ncbi_101772896	Dnajb5	9.45	9.07	11.21	11.22	12.99	10.92	12.72	10.47	8.71	17.04	14.7	13.57
ncbi_101773348	SNX2B	18.49	12.97	19.55	17.92	21.12	25.51	22.38	21.77	23.44	30.12	29.93	32.84
ncbi_101773426	ACR10	4.18	3.02	3.15	5.01	7.15	6.26	6.71	4.68	4.5	9.13	7.46	7.81
ncbi_101773470	ARIA	21.31	20.21	22.43	21.67	24.91	22.83	23.33	26.61	23.5	27.71	27.47	29.1
ncbi_101773488	SAUR36	82.92	59	102.13	74.59	47.48	50.65	92.04	64.47	66.16	40.95	56.3	45.45
ncbi_101773545	ABCB20	4.73	4.2	5.73	4.96	6.74	5.7	6.29	6.38	7.34	8.36	8.72	8.11
ncbi_101773593	--	1.93	0.97	1.21	2.73	3.26	2.28	1.45	1.73	2.3	3.52	2.79	3.6
ncbi_101773624	CRK25	7.64	7.03	4.69	4.83	4.51	4.24	4	5.72	3.75	0.7	0.6	0.98
ncbi_101773820	--	118.73	113.34	169.05	136.72	178.63	150.3	124.1	99.25	92.4	193.17	184.98	155.55
ncbi_101773856	NAGS2	8.45	8.79	8.08	7.87	10.85	7.8	9.49	8.17	7.47	11.95	9.81	8.05
ncbi_101773979	OTU1	19.81	22.81	25.98	24.83	33	29.22	27.51	24.86	26.18	33.88	29.06	35.87
ncbi_101774018	--	13.11	12.57	14.17	13.45	15.25	13.98	12.83	13.29	12.17	15.75	15.09	16.46
ncbi_101774165	COI1B	23.27	18.7	25.86	23.09	41.6	37.07	27.53	27.52	27.74	39.61	39.17	42.52
ncbi_101774229	COL5	2.77	1.45	4.18	7.99	13.58	11.15	10.5	13.42	9.22	27.68	27.01	27.9
ncbi_101774318	--	13	12.88	14.11	19.92	24.1	19.57	10.33	13.88	16	20.29	16.36	25.6
ncbi_101774420	PAD4	80.43	77.82	40.51	52.75	49.04	53.84	56.52	84.22	74.24	39.59	34.56	51.66
ncbi_101774489	--	1.17	1.21	2.15	1.28	2.48	2.29	2.74	3.17	2.33	5.79	3.91	3.83
ncbi_101774517	H2B.5	6.64	8.81	24.96	7.13	22.74	18	11.11	10.25	10.93	26.38	25.1	25.51
ncbi_101774745	XI-F	2.66	1.73	3.41	3.74	5	4.13	5.22	3.97	3.56	8.53	6.96	7.58
ncbi_101774773	--	6.07	5.76	9.53	7.67	12.22	11.74	12.84	13.47	14.32	22.96	20.8	19.79
ncbi_101774894	SHM7	22.19	22.4	30.19	30.31	54.53	35.11	31.69	30.57	25.61	70.24	51.83	39.06
ncbi_101774922	RDM16	7.09	5.9	9.3	8.23	9.78	8.76	11.82	10.84	10.43	14.17	14.96	13.84
ncbi_101775027	--	3.47	2.94	4.18	4.79	6.29	5.47	6.21	6.94	5.94	9.12	9.25	7.13
ncbi_101775186	PLP2	37.8	62.13	32.75	29.67	19.21	31.54	28.52	34.33	27.18	4.57	10.86	10.62
ncbi_101775341	SAP16	100.76	106.93	77.04	78.48	81.4	80.1	57.64	66.31	55	23.21	34.57	29.56
ncbi_101775429	PCMP-E91	0.58	0.68	1.3	1.16	1.93	1.39	1.41	1.52	1.46	2.17	2.33	2.48
ncbi_101775432	--	8.2	6.79	8.52	9.91	11.74	11.06	14.44	10.76	8.76	16.92	14.63	15.24
ncbi_101775645	--	22.34	21.38	28.1	27.27	38.87	34.94	26.44	26.67	25.59	47.54	44.85	48.73
ncbi_101775751	RPT2	26.01	31.59	37.07	41.65	104.46	85.55	36.91	52.84	53.78	93.87	75.99	109.42
ncbi_101775767	RGA5	3.06	2.58	4.08	5.19	6.83	5.89	5.61	6.22	5.42	10.61	7.43	7.82
ncbi_101775944	--	0.13	0.07	0.69	0.46	0.63	0.87	0.14	0.38	0.35	1.03	1.09	0.69
ncbi_101776053	--	21.17	20.71	26	55.44	78	91.62	57.59	48.31	36.08	79.6	126.31	102.69
ncbi_101776072	Os03g0405500	201.88	239.82	277.64	163.11	118.01	99.6	195.7	224.17	166.63	98.95	94.61	94
ncbi_101776208	--	183.22	168.86	163.07	225.38	222.92	203.61	230.24	207.54	180.77	283.61	222.45	239.91
ncbi_101776224	IAA16	1.62	4.7	8.91	8.58	12.87	15.35	6.95	4.83	9.96	13.77	10.96	16.13
ncbi_101776287	OXI1	13.33	9.25	5.82	9.6	4.2	5.19	11.13	7.62	5.21	2.83	4.97	5.09
ncbi_101776423	At3g08570	3.9	3.49	2.98	6.12	10.77	6.61	2.44	5.33	4.66	10.77	6.21	13.01
ncbi_101776607	CGS1	88.29	82.53	88.39	96.77	112.02	112.25	88.85	93.06	72.77	113.6	114.04	134.04
ncbi_101776961	WAK2	3.22	2.79	1.31	0.77	1.55	1.87	2.75	3.28	1.86	0.62	0.86	1.2
ncbi_101776976	CYP734A4	2.65	1.88	5.56	4.4	11.84	10.48	5.37	5.04	4.78	10.5	8.94	7.85
ncbi_101776977	--	0.5	0.45	0.43	0.24	0.34	0.12	0.47	0.28	0.34	0.08	0.14	0.34
ncbi_101777075	SDF2	52.07	48.06	41.72	41.84	40.48	36.78	31.68	44.48	39.85	19.84	28.87	23.91
ncbi_101777497	RIPK	393.62	522.73	461.79	313.94	268.36	338.56	209.36	304.5	317.99	10.78	38.8	29.72
ncbi_101777570	HCT4	10.26	11.4	6.73	10.28	7.61	3.36	7.52	15.69	10.93	5.21	4.1	5.07
ncbi_101777681	MYBC1	1.14	1.36	3.83	2.09	5.34	3.58	5.93	4.07	3.66	7.17	8.6	8.99
ncbi_101777843	--	3.28	3.03	6.35	5.94	8.92	7.32	9.99	10.58	11.97	15.59	13.77	17.71
ncbi_101777847	At3g13620	0.48	0.21	0.31	0.64	2.33	1.09	0	0.76	0.03	1.26	0.21	2.08
ncbi_101778020	UBC5A	60.79	70.36	84.92	88.35	97.19	95.3	73.76	78.89	89.51	105.34	86.4	111.83
ncbi_101778253	At3g13560	4.47	0.86	8.95	5.6	6.21	7.49	5.89	3.58	3.49	6.91	6.43	5.83
ncbi_101778372	LPPD	52.56	47.3	43.34	43.62	33.31	37.24	50.94	46.11	44.56	28.18	28.21	32.62
ncbi_101778461	--	206.43	169.15	67.58	142.65	58.92	113.88	109.67	156.73	122.36	82.35	70.13	81.55
ncbi_101778963	EXA1	14.92	13.88	18.87	18.2	26.16	23.4	18.32	16.42	17.6	23.06	23.67	23.61
ncbi_101778969	ABCE2	6.61	7.54	9.5	8.68	12.11	10.4	12.79	10.01	11.58	17.87	17.1	13.17
ncbi_101779090	RFI2	12.23	9.88	14.33	14.35	16.26	15.14	15.38	16.43	18.05	21.82	20.85	24.28
ncbi_101779218	alaXL	57	76.77	49.98	38.55	39.62	31.81	46.99	41.35	31.27	12.49	16.78	12.13
ncbi_101779505	PUB45	0.28	0.26	0.34	0.63	1.35	0.96	0.28	0.49	0.58	1.89	1.27	1.32
ncbi_101779621	TRAF1A	18.97	19.82	22.67	19.83	24.52	24.72	18.77	19.55	21.19	30.72	31.71	27.41
ncbi_101779711	--	6.66	3.67	3.98	9.81	9.73	7.43	11.51	7.59	6.19	17.52	14.91	14.37
ncbi_101779734	Os06g0694000	17.34	15.31	22.42	17.92	24.79	21.52	27.74	29.94	28.6	39.3	36.51	36.01
ncbi_101779753	TS1	34.34	25.3	31.75	28.56	39.72	32.09	30.01	31.86	25.75	48.17	35.38	36.53
ncbi_101779769	CRR2	0.87	0.48	0.67	0.99	1.35	0.82	1.09	0.91	0.9	2.42	1.46	1.35
ncbi_101779855	--	22.55	19.76	24.36	21.67	26.78	24.28	28.68	30.21	28.46	33.47	35.05	31.47
ncbi_101779954	--	5.51	4.85	6.89	5.83	9.83	9.18	8.41	9.24	9.64	12.29	14.59	11.72
ncbi_101780161	4CLL5	20.89	20.87	21.7	25.39	29.23	28.77	20.76	22.36	27.73	30.13	28.92	40.45
ncbi_101780552	--	18.51	20.62	19.88	22.78	25.06	24.14	20.3	22.65	26.04	27.62	24.49	21.61
ncbi_101780678	5MAT	0.16	0.24	0.26	0.77	0.81	0.31	0.11	0.51	0.24	0.77	1.07	1.28
ncbi_101780789	RPB2	24.2	22.49	24.49	23.94	27.83	29.33	23.95	24.79	25.91	36.03	34.7	28.13
ncbi_101780859	mybL	5.96	5.24	6.88	6.3	9.41	7.83	7.35	7.04	7.52	10.04	10.42	8.32
ncbi_101780915	APUM7	0.21	0.1	0.2	0.43	0.76	0.82	0.07	0.35	0.4	0.56	0.45	0.77
ncbi_101780959	--	74.8	58.02	64.71	47.94	16.9	27.2	45.55	52.23	56.97	13.51	16.2	12.7
ncbi_101781046	SDI1	6.92	7.4	10.71	15	26.76	12.16	8.57	4.78	3.33	39.14	20.05	12.14
ncbi_101781477	WRKY71	223.22	217.08	174.73	153.55	130.52	143.26	152.07	285.27	322.28	34.02	34.43	88.45
ncbi_101781622	--	0.71	0.31	0.62	0.46	0.8	1.19	0.55	0.49	0.93	1.27	0.91	1.11
ncbi_101781701	--	8.98	7.02	16.16	12.68	18.91	11.82	9.41	9.45	15.65	24.34	17.17	14.91
ncbi_101781905	IPT3	2.9	1.78	0.53	2.21	1.2	1.03	2.57	2.99	0.77	0.21	0.24	0.16
ncbi_101781917	PRAF1	6.74	6.11	7.6	8.23	12.94	9.34	10.35	9.48	11.79	14.68	15.44	14.48
ncbi_101781953	H0311C03.3	4.81	4.33	4.36	4.96	6.14	5.76	3.66	4.72	4.79	6.66	7.07	8.38
ncbi_101782355	--	0.81	0	0.42	0.86	1.26	0.53	0.64	0.57	0.48	0.78	1.16	1.28
ncbi_101782363	NFYB10	0.18	0.15	0.33	0.67	1.27	0.67	0.66	1.03	0.71	2.27	1.36	2.09
ncbi_101782525	APS3	20.42	17.85	25.35	53.83	62.51	30.09	39.54	37.51	25.59	74.63	47.63	33.25
ncbi_101782690	ARI2	9.18	9.11	10.79	11.76	13.76	12.87	12.49	11.97	12.49	17.69	16.06	15.82
ncbi_101782716	--	411.31	449.89	517.68	502.56	817.46	990.91	598.83	668.43	649.91	659.54	868.89	937.08
ncbi_101783232	HIPP05	464.5	559.12	393.52	447.25	297.09	451.85	396.11	327.06	294.63	114.77	199.86	184.68
ncbi_101783301	--	2.49	1.05	4.06	5.86	6.24	6.59	1.71	3.29	3.24	8.66	5.97	7.9
ncbi_101783305	APO1	3.1	3.02	3.8	2.69	5.37	3.85	2.19	2.82	3.38	4.8	5.11	5.24
ncbi_101783445	NET3A	3.68	4.24	4.17	5.69	7.6	7.43	4.01	5.05	8.18	8.54	8.56	11.16
ncbi_101783675	--	1.98	0.8	2.18	1.9	3.46	3.31	1.77	1.68	2.54	4.16	2.53	4.56
ncbi_101783697	DDB1B	9.12	9	11.42	10.18	13.58	12.4	10.67	11.41	11	17.74	16.73	13.86
ncbi_101783762	--	5.16	5.18	6.08	7.41	9.38	7.43	8.45	9.46	8.86	11.42	12.6	13.21
ncbi_101783783	--	30.89	32.97	34.18	34.78	48.4	43.67	31.96	33.65	35.58	43.17	46.25	42.6
ncbi_101784240	PIL13	1.82	1.31	1.79	3.4	6	6.54	2.73	2.17	2.32	6.25	5.19	5.97
ncbi_101784353	AT4	1.65	1.28	0.81	0.91	0.76	1.26	1.6	1.34	0.96	0.75	0.98	0.73
ncbi_101784384	--	0.59	0.57	1.11	1.36	2	1.4	1.04	1.88	1.59	2.44	2.11	1.9
ncbi_101784479	TRP5	15.52	16.15	20.22	21.95	33.81	28.13	24	23.37	21.38	37.28	34.65	32.65
ncbi_101784562	--	14.76	16.71	13.95	12.23	11.43	11.48	11.35	10.81	9.1	6.43	5.77	5.72
ncbi_101784780	CPK18	154.88	180.26	130.68	129.96	130.97	120.72	73.18	94.48	83.33	31.47	29.07	31.06
ncbi_101784793	TOC90	5.39	3.94	5.33	7.12	9.08	5.93	9.2	9.29	8.54	14.54	14.66	12.92
ncbi_101784827	WAK2	7.99	7.73	2.07	4.64	4.13	3.58	4.25	5.9	4.51	0.68	2.15	0.64
ncbi_101784886	ARA1	11.33	10.5	15.65	14.1	13.77	16.28	12.06	9.54	10.65	22.18	20.71	16.42
ncbi_101784982	FRS6	5.26	6.09	8.04	7.69	8.17	7.96	8.34	9.46	9.51	11.38	12.18	11
ncbi_101785075	--	20.59	20.83	27.78	26.8	25.97	23.87	24.81	23.85	25.95	28.43	27.79	26.22
ncbi_101785403	--	0.41	0.22	0.45	0.17	0.56	1.03	0.17	0.54	0.62	0.58	0.66	0.83
ncbi_101785481	At1g08370	0.14	0.45	0.18	0.63	1.06	0.78	0.31	0.94	1.06	1.1	0.95	0.84
ncbi_101785521	NLP3	15.55	16.06	21.72	36.39	47	46.5	34.29	35.53	43.34	85.29	70.23	56.69
ncbi_101785664	Dnajb13	8.33	7.04	7.64	9.03	11.2	9.43	9.05	9.46	8.49	13.94	12.88	11.41
ncbi_101785955	PDX2	19.85	19.98	21.91	31.44	33.36	33.22	40.02	35.01	28.53	63.06	51.14	48.86
ncbi_101785965	--	22.63	21.81	25.31	23.87	27.8	25.96	21.91	20.93	22.51	31.6	30.21	28.25
ncbi_101786220	AAP6	1.24	1.82	3.3	3.12	6.31	6.47	7.82	6.89	8.43	17.04	18.42	11.4
ncbi_101786375	ARF8	1.36	1.26	1.37	1.75	3.27	2.79	1.03	1.05	2.28	2.86	3.57	3.75
ncbi_101786418	WRKY75	216.04	215.31	162.95	188.94	114.66	149.58	180.15	185.67	136.07	51.99	116.54	93.27
ncbi_101786423	IAA19	15.52	22.19	15.44	12.68	11.12	10.91	9.12	11.78	17.38	2.92	3.51	4.48
ncbi_101786520	--	37.29	41.11	38.66	29.74	33.64	28.86	23.75	25.09	32.18	15.45	14.11	13.57
ncbi_101786778	UGT76F1	0.37	1.14	1.18	0.82	0.85	1.14	0.35	0.6	1.47	1.7	1.48	1.76
ncbi_101786971	CREG1	6.01	7.23	7.9	6.64	8.8	8.88	10.92	11.69	9.47	13.77	15.18	14.73
ncbi_101786984	atad1	9.48	8.82	11.27	13.67	18.79	16.63	16.83	16.92	18.78	25.54	23.89	26.67
ncbi_105914286	--	4.23	7.2	9.39	13.29	28.9	24.14	19.53	8.41	7.13	26.18	17.79	27.4
ncbi_111255653	Os03g0733400	4.03	3.2	3.71	3.49	5.15	4.66	4.64	5.38	4.59	6.73	6.25	6.17
ncbi_111255836	CPK10	99.5	103.84	92.44	64.77	64.71	77.2	65.02	71.88	75.96	11.57	18.92	19.88
ncbi_111256641	--	0.96	0.34	0.97	1.53	1.1	1.1	2.03	1.86	1.52	2.72	2.71	2.88
ncbi_111257864	--	0.91	0.39	0.99	0.64	0.98	0.95	0.82	0.72	0.67	1.26	0.7	1.33

## Sheet: MM13
Table S6 Differentially expressed genes within modules13
GeneID	Symbol	LD-1	LD-2	LD-3	LDCK-1	LDCK-2	LDCK-3	HD-1	HD-2	HD-3	HDCK-1	HDCK-2	HDCK-3
ncbi_101752484	GALT2	1.78	1.57	2.59	2.41	3.95	4.11	3.9	3.82	3.85	4.2	5.36	4.95
ncbi_101752511	CRCK3	283.56	311.05	247.33	202.58	236.03	250.27	82.63	121.48	117.58	21.39	40.58	40.24
ncbi_101752521	At3g52320	2.9	1.54	2.61	3.59	3.88	3.3	5.41	5.18	4.35	7.01	6.03	7.09
ncbi_101752767	MGAT3	10.77	12.3	16.03	26.08	26.96	28.2	50.73	38.28	32.91	62.59	40.27	56.81
ncbi_101752768	UPL5	4.07	2.99	3.66	6.21	6.21	5.49	8.19	7.51	6.48	9.92	10.2	8.45
ncbi_101752874	SKIP24	4.12	2.73	3.96	5.58	7.4	6.03	8.76	6.12	5.26	8.38	8.63	7.53
ncbi_101752952	--	2.5	1.42	1.99	3.24	2.94	2.35	5.44	4.18	4.3	7.22	5.96	6.31
ncbi_101752998	NFXL1	266.84	340.33	192.76	142.41	125.62	179.47	67.9	75.09	82.99	61.03	88.59	66.41
ncbi_101753133	IAA6	21.61	13.99	29.73	30.23	43.25	29.48	70.46	40.89	31.16	68.39	65.26	60.33
ncbi_101753145	MLO1	248.74	403.69	272.3	153.92	180.13	170.44	38.15	63.57	54.3	9.95	13.85	20.44
ncbi_101753163	--	0.08	0.08	0.11	0.51	0.65	1.22	1.41	1.09	0.43	1.04	2.35	2.28
ncbi_101753179	Rnf5	3.15	3.58	4.72	6.57	7.81	4.83	7.58	6.13	5.85	9.23	7.88	8.75
ncbi_101753183	ILR3	30.21	33.69	16.99	36.73	49.06	44.42	43.01	38.9	39.95	51.81	45.48	46.84
ncbi_101753280	RABA1F	331.91	539.01	441.69	165.98	126.33	284.92	92.67	154.42	187.21	34.72	68.35	71.93
ncbi_101753379	--	6.13	6.3	9.05	15.59	17.2	16.48	21.42	13.18	9.39	20.5	18.66	20.19
ncbi_101753414	--	20.81	16.49	20.24	30.14	32.43	28.74	31.41	27.72	28.22	30.69	33.86	33.04
ncbi_101753559	MEKK1	14.67	20.98	14.43	6.03	7.79	12.17	3.62	7.44	7.99	2.29	3.02	3.61
ncbi_101753575	CXE15	0.32	0.42	0.44	0.49	1.91	1.66	1.36	1.05	1.05	1.02	2	1.85
ncbi_101753598	--	488.42	703.22	551.44	311.54	431.5	495.99	137.43	311.26	337.2	25.3	54.2	85.02
ncbi_101753617	At2g19130	3.92	12.43	9.29	2.03	5.82	5.37	3.89	5.67	6.58	0.88	0.88	1.28
ncbi_101753657	CYSK	0.33	0.11	0.24	0.7	0.46	0.43	0.7	0.12	0.33	0.34	0.42	1.09
ncbi_101753773	At1g34470	18.9	18.92	15.72	15.66	16.11	16.59	12.14	13.97	14.12	11.05	12.49	10.96
ncbi_101753774	CDKC-1	26.08	31.48	31.71	20.49	22.06	19.31	12.31	17.2	19.08	12.46	11.91	9.88
ncbi_101753905	At5g49610	0.39	0.15	0.71	0.63	1.05	0.55	1.11	0.77	1.13	1.01	1.18	0.99
ncbi_101753916	2023-10-07	184.16	185.81	101.68	143.5	103.27	107.09	59.32	69.4	64.36	20.51	25.8	26.78
ncbi_101753982	--	6.82	5.71	5.64	11.29	13.9	11.76	17.37	10.25	9.17	17.72	14.82	14.1
ncbi_101753998	AIRP2	6.03	5.41	5.67	7.28	9.87	8.23	10.07	7.57	8.67	11.3	11.35	10.28
ncbi_101754020	RGA3	4.35	4.28	6.81	5.48	11.5	8.5	9.6	10.09	9.01	14.45	12.58	12.33
ncbi_101754078	HSFA9	192.87	191.2	153.25	137.6	124.85	144.86	42.43	81.5	65.59	20.33	27.7	26.14
ncbi_101754197	PIP5K2	1.1	0.94	0.55	0.6	0.21	0.18	0.1	0.72	1.12	0.12	0.19	0.12
ncbi_101754198	PRR73	354.21	312.02	277.43	262.32	302.1	269.11	284.15	254.58	267.91	275.11	265.15	233.15
ncbi_101754329	RMD5	13.44	11.04	12.88	18.32	22.04	17.02	21.95	17.38	15.78	21.63	19.26	23.32
ncbi_101754468	CTR1	45.75	42.47	43.84	33.71	28.38	31.56	13.36	13.81	17.95	9.26	10.38	9.85
ncbi_101754511	--	0.56	1.41	0.61	0.51	0.46	0.48	0.32	0.71	0.52	0.32	0.25	0.56
ncbi_101754560	--	3.22	2.76	2.38	3.64	4.51	3.54	4.29	3.57	2.48	3.47	3.75	4.85
ncbi_101754597	KRP5	3.28	3.03	2.36	4.78	4.59	5.57	5.6	5.12	4.12	6.49	5.21	5.47
ncbi_101754629	At2g33490	61.33	62.08	47.9	53.9	36.82	43.02	15.48	25.25	27.25	2.98	5.09	5.82
ncbi_101754698	PUB27	5.7	10.32	4.81	2.8	4.09	7.15	5.06	2.87	3.87	4.16	5.91	4.78
ncbi_101754707	XRCC4	12.75	15.69	13.27	8.94	9.93	8.28	5.1	7.79	8.29	3.54	3.86	3.82
ncbi_101754762	At5g58090	0.34	0.27	0.21	0.63	0.59	0.51	1.23	0.97	0.79	1.55	1.18	1.26
ncbi_101754827	MSL1	13.56	15.65	12.94	7.93	7.46	11.81	4.58	7.19	4.6	1.52	2.41	3.33
ncbi_101754969	At2g01600	184.47	177.14	140.77	158.72	136.4	141.3	108.16	123.89	120.59	94.61	96.69	89.97
ncbi_101755074	WAK5	42.5	108.08	52.77	13.61	18.94	30.87	8.24	34.18	32.79	5.05	10.14	15.22
ncbi_101755199	Y-2	140.45	160.74	151.81	72.04	39.1	57.7	39.09	54.3	65.78	14.42	58.12	23.06
ncbi_101755206	BXL6	3.34	2.96	4.64	11.57	12.18	13.27	20.37	9.56	8.43	18.96	20.44	15.65
ncbi_101755303	EXO70A3	16.19	40.24	38.13	8.62	14.95	23.33	18.05	20.82	19.61	5.95	11.1	9.78
ncbi_101755363	NUDT23	4.25	3.73	6.73	8.07	10.73	10.72	15.01	12.3	9.73	15.96	14.82	16.5
ncbi_101755442	CCR1	112.49	182.36	173.36	33.15	38.73	31.65	15.68	39.45	51.95	11.02	14.37	15.07
ncbi_101755460	RLK7	2.47	6.28	2.88	1.76	3.84	3.07	1.1	2.11	3.88	0.85	1.24	1.97
ncbi_101755467	NHO1	17.46	8.06	11.97	21.4	32.17	22.14	87.77	38.61	30.9	100.4	66.36	76.93
ncbi_101755614	METTL18	224.16	257.23	137.95	134.26	80.6	128.14	75.81	75.67	85.5	38.98	46.53	42.32
ncbi_101755711	--	23.5	44.98	35.21	10.19	15.16	18.4	14.9	20.34	19.9	6.58	12.77	10.52
ncbi_101755753	CCDC124	36.81	34.67	29.84	28.16	23.33	25.17	25.99	29.11	22.46	17.94	23.11	19.94
ncbi_101755780	VIL1	54.93	55.05	47.08	44.72	41.46	45.04	17.12	31.33	30.48	16.57	24.35	17.29
ncbi_101755831	--	0.28	0.2	1.08	1.52	1.54	1.36	1.56	1.94	1.45	2.28	0.67	1.21
ncbi_101755966	NET4B	1040.34	1236.55	897.77	901.59	728.71	631.14	368.1	624.77	793.92	67.81	188.01	131.86
ncbi_101755968	CRK6	22.4	34.56	21.32	18.52	19.21	24.49	7.81	15.89	15.03	2.53	1.84	4.09
ncbi_101755970	H2B.5	18.49	13.61	18.49	33.51	37.35	30.03	38.48	24.4	20	35.99	31.85	32.91
ncbi_101756059	--	4.42	8.09	8.2	3.15	3.26	1.81	0.64	3.13	3.65	0.35	0.43	0.27
ncbi_101756082	At3g49150	16.58	19.3	21.25	7.99	10.59	12.67	9.53	12.96	13.83	5.73	6.71	5.05
ncbi_101756112	AIRP2	12.57	8.47	8.28	18.26	18.15	15.41	30.03	15.77	14.99	35.41	30.3	29.96
ncbi_101756132	21D7	29.28	21.14	27.42	33.61	37.12	36.04	44.05	43.45	37.89	49.69	48.56	51.18
ncbi_101756139	PEPR1	6.79	6.98	4.61	2.84	2.86	3.9	0.91	3.66	3.38	0.41	0.93	0.59
ncbi_101756181	ARAD1	5.65	1.73	5.04	6.21	8.39	7.38	10.23	8.2	5.11	10.28	8.99	8.02
ncbi_101756210	--	1.02	1	0.42	0.31	0.37	0.56	0.37	0.83	0.83	0.12	0.5	0.06
ncbi_101756213	MSL10	0.6	0.52	0.6	0.81	1.21	1.3	1.53	1.01	1.18	1.61	1.87	2.01
ncbi_101756350	--	18.79	13.05	9.85	35.59	34.92	30.66	39.66	29.38	20.31	48.47	41.33	39.57
ncbi_101756367	HIPP20	37.82	23.82	59.32	38.21	69.82	62.28	60.94	57	58.59	91.13	68.61	82.8
ncbi_101756378	CM2	12.24	19.24	17.23	5.13	7.12	5.33	10.98	12.39	13	7.34	5.55	5.21
ncbi_101756425	BC10	61.15	68.86	79.41	30.89	29.8	29.88	18.22	33.07	34.88	12.4	12.3	12.16
ncbi_101756556	APF1	129.55	116.13	154.69	93.56	79.16	95.81	17.8	39.37	47.5	12	18.47	16.64
ncbi_101756704	--	64.63	62.67	49.01	92.48	80.49	101.99	103.83	52.13	56.21	136.38	116.39	114.34
ncbi_101756756	DSE1	4.23	2.99	4.59	6.85	6.4	5.79	5.65	5.15	5.56	6.34	6.39	5.64
ncbi_101756758	--	21.33	28.12	26.4	10.73	13.26	15.89	12.35	22.12	21.59	9.19	14.15	10.52
ncbi_101756775	Os06g0194400	0.98	0.75	1.09	0.43	0.32	0.42	0.39	0.42	0.35	0.04	0.32	0.04
ncbi_101756809	PBF1	9.7	7.89	10.3	10.56	12.26	10.66	22.61	19.82	18.09	23.07	20.71	24.8
ncbi_101756866	At5g14285	2.47	1.81	2.21	5.63	3.44	4.53	5.78	6.36	4.22	8.18	6.54	6.57
ncbi_101756890	PK1	2.33	2.35	2.25	0.91	0.99	1.5	0.64	0.71	0.85	0.32	0.43	0.47
ncbi_101756927	SKP1	49.33	48.61	60.38	58.6	69.34	57.57	90.74	84.06	79.99	101.33	89.33	104.3
ncbi_101756963	At1g19160	7.4	7.84	11.22	10.26	16.46	11.5	14.13	15.33	13.23	20.96	14.55	20.51
ncbi_101757031	RF2b	0.53	1.6	0.62	0.23	0.15	0.34	0	0.28	0.2	0.07	0	0.07
ncbi_101757038	--	187.04	86.97	143.85	276.52	183.54	126.06	263.9	171.65	159.07	238.87	202.03	188.81
ncbi_101757080	GDPDL4	92.35	145.63	151.21	91.24	86.56	72.87	35.2	57.27	69.42	6.26	8.17	6.97
ncbi_101757130	CAT7	6.76	6.88	7.94	3.8	3.61	4.45	1.42	1.99	1.23	0.17	0.68	0.44
ncbi_101757149	PRX74	3.84	5.67	4.43	3.51	3.19	3.61	1.32	2.15	3.62	0.47	0.84	0.97
ncbi_101757180	Slc25a44	1.5	0.91	0.77	3.31	2.45	1.46	4.95	3.05	2.14	4.44	4.09	6.27
ncbi_101757241	--	0.67	0.6	1.07	3.01	2.85	2.62	3.3	3.62	3.28	3.91	4.89	3.75
ncbi_101757282	At1g32090	33.38	47.89	39.86	20.82	11.31	11.52	10.17	17.11	27.11	5.53	10.32	4.53
ncbi_101757297	HMA1	16.87	17.1	17.46	19.57	20.3	21.8	27.28	27.03	27.14	32.24	31.15	34.94
ncbi_101757341	GONST1	30.18	32.06	24.87	21.23	22.11	25.33	13.52	15.42	16.43	6.77	8.13	9.51
ncbi_101757373	GATA26	0.21	0.67	0.57	0.85	1.29	1.22	1.46	1.41	0.96	1.6	2.08	2.51
ncbi_101757438	--	0.9	0.96	1.11	1.14	2.13	1.19	1.92	1.47	1.95	2.08	2.08	1.25
ncbi_101757561	At1g32780	3.24	7.12	2.72	2.5	2.84	2.87	2.67	3.06	4.18	2.27	1.81	2.91
ncbi_101757605	At3g20280	10.96	11.2	11.84	16.83	18.32	16.9	15.76	14.76	14.71	18.6	17.5	17.68
ncbi_101757637	FUT13	5.15	3.83	4.41	10.6	10.63	10.29	16.05	13.16	11.96	16.95	12.76	13.83
ncbi_101757715	At1g12760	27.59	27.9	21.52	20.56	24.41	17.24	8.59	14.8	15.38	3.58	5.05	5.39
ncbi_101757722	RAN2	1636.73	1595.48	1241.6	1400.77	925.6	1157.16	487.46	643.04	605.22	375.26	487.05	441.05
ncbi_101757922	At2g19130	0.46	1.72	1.08	0.44	0.66	0.45	0.69	0.95	0.77	0.04	0.43	0.11
ncbi_101757934	ATL66	9.66	10.32	8.38	4.35	5.42	4.05	4.09	6.22	8.22	2.58	2.4	3.11
ncbi_101757942	STR7	4.38	4.53	6.18	5.24	7.13	6.59	9.33	10.15	9.85	11.27	10.45	11.81
ncbi_101757958	--	10.93	8.66	14.56	18.16	23.3	17.93	35.89	28.62	28.25	34.66	34.82	31.63
ncbi_101758013	--	3.65	3.71	5.47	3.28	6.32	6.76	11.17	8.65	8.02	11.94	12	11.27
ncbi_101758042	-	19.28	18.52	17.33	13.64	13.83	13.56	7.85	9.71	12.46	4.06	4.49	2.78
ncbi_101758046	ILL8	1.28	1.18	1.32	0.59	0.63	1.05	1.02	0.96	0.59	0.77	0.72	0.72
ncbi_101758114	RFWD3	5.27	4.89	6.07	6.11	7.69	7.98	8.69	7.78	6.17	8.66	9.23	7.14
ncbi_101758136	TAF7	16.05	14.68	17.55	21.11	23.64	23.89	22.25	19.09	16.05	23.71	21.4	22.87
ncbi_101758211	--	1.87	2.8	2.88	3.07	4.17	2.74	3.77	2.61	2.6	3.36	3.13	3.44
ncbi_101758230	--	1.15	1.07	0.8	1.22	0.39	0.75	0.76	1.12	0.46	0.67	1.07	0.16
ncbi_101758313	PEPKR2	5.09	3.92	5.6	6.13	7.09	6.54	6.55	5.01	4.87	7.61	7.21	7.78
ncbi_101758316	GYP7	46.37	51.14	51.07	28.67	42.27	33.29	25.97	30.84	30.42	18.18	20.86	22.95
ncbi_101758324	--	14.05	10.76	15.55	16.35	19.16	17.17	22.55	17.16	15.32	21.87	21.31	19.22
ncbi_101758426	--	15.94	12.54	18.01	16.43	20.72	17.09	19.53	15.84	17.28	19.55	18.12	16.38
ncbi_101758493	TRN1	2.1	3.17	2.57	1.4	2.08	2.43	1.42	1.79	2.14	1.68	1.9	1.63
ncbi_101758499	PTO1242	14.94	18.77	16.33	7.76	6.9	9.98	1.41	2.32	2.34	0.2	0.21	0.35
ncbi_101758509	PCMP-E5	1.2	1.96	1.64	1.04	0.88	0.91	0.37	0.83	0.75	0.31	0.54	0.37
ncbi_101758551	AMY3	10.93	9.13	11.44	17.13	17.8	17.54	31.39	24.17	24.13	40.68	32.2	33.82
ncbi_101758600	NAC100	64.07	34.87	37.35	82.45	62.12	67.68	94.98	54.26	41.94	85.93	86.48	87.67
ncbi_101758687	DSP8	0.54	0.98	2.66	1.96	3.06	2.2	4.78	3.57	3.85	4.86	5.33	5.44
ncbi_101758725	PHOX1	39.53	50.49	49.93	32.91	32.56	39.64	33.05	33.59	34.84	32.59	29.03	23.07
ncbi_101758763	GAUT13	52.86	87.15	59.03	37.53	37.17	59.2	18.76	23.73	28.74	9.05	8.94	10.16
ncbi_101758834	RGA5	1.75	2.79	1.76	0.92	1.42	1.5	0.97	1.11	1.22	1.05	1.51	1.07
ncbi_101758852	MIP1	8.1	7.62	9.22	11.94	12.38	12.62	13.34	13.54	11.45	18.38	15.82	16.56
ncbi_101759098	ATG13A	7.75	8.17	8.87	10.99	10.01	9.92	11.2	9.03	8.45	9.46	12.92	10.94
ncbi_101759112	AHL20	0.65	0.22	0.21	0.53	0.84	0.88	1	0.28	0.92	1.44	0.4	0.33
ncbi_101759188	FAP2	275.35	338.4	277.78	169.19	167.55	206.25	54.84	82.5	76.36	15.71	13.84	15.25
ncbi_101759202	STAR1	10.56	3.4	6.71	10.29	8.85	7.45	12.01	7.01	5.02	8.49	10.38	9.64
ncbi_101759242	--	10.85	8.7	10.96	6.04	6.41	6.35	4.44	4.97	6.01	3.93	4.39	4.25
ncbi_101759258	UXT1	3.25	5.69	9.4	1.8	3.35	1.22	2.07	3.32	5.29	0.66	0.41	1.08
ncbi_101759276	SWI3C	30.06	29.7	25.65	21.13	22.69	22.55	23.72	24.49	23.79	20.07	19.95	20.16
ncbi_101759309	RPN9B	49.96	43.21	58.76	52.15	58.42	54.81	81.18	74.43	70.76	83.24	79.58	81.21
ncbi_101759327	--	3.99	3.98	5.79	6.41	7.4	5.93	9.46	8.7	6.6	9.71	9	9.12
ncbi_101759330	DSP4	70.71	73.54	66.11	47.19	62.13	60.11	51.81	60.35	90.63	45.76	47.43	68.77
ncbi_101759376	At4g26480	26.25	22.55	29.76	33.31	38.27	36.26	38.65	38.84	33.3	44.77	39.42	41.38
ncbi_101759379	--	8.84	7.45	12.6	9.83	18.81	17.63	12.96	13.36	15.36	18.38	17.63	15.28
ncbi_101759583	LOL3	319.04	360.92	310.96	231.55	146.25	213.82	164.17	208.55	230.02	64.37	136.24	117.67
ncbi_101759701	-	1.42	1.55	2.57	0.49	0.4	0.38	0.89	1.09	0.5	0.27	0.46	0.49
ncbi_101759732	CRCK2	94.03	113.1	108.26	51.23	73.1	77.89	44.46	47.41	45.22	11.05	13.46	13.66
ncbi_101759746	H2B.2	9.75	7.48	11.96	19.42	19.53	19.95	24.74	13.57	11.53	27.04	21.59	22.66
ncbi_101759897	PIA2	16.33	10.54	15.71	22.83	25.8	20.73	22.81	23.71	21.95	35.63	32.88	27.12
ncbi_101760030	VPS28-1	32.06	33.45	33.08	28.96	29.3	29.38	25.53	32.83	30.71	22.12	28.8	24.54
ncbi_101760223	RKD5	1.08	0.51	1.38	1.45	2.27	1.2	2.06	1.69	1.53	2.5	2.13	3.27
ncbi_101760296	STK11IP	24.55	26.75	31.24	24.26	19.68	23.54	13.99	18.89	22.3	14.93	16.16	14.27
ncbi_101760312	LPD1	18.08	18.67	20.36	29.39	30.52	27.23	32.44	31.47	26.66	38	32.23	37.77
ncbi_101760314	--	3.63	3.13	3.63	3.26	5.86	4.22	9.32	7.13	7.3	9.92	9.88	9.39
ncbi_101760368	NAC090	3.35	3.46	2.91	0.45	0.76	2.31	1.91	1.89	2.04	0.24	0.5	0.37
ncbi_101760370	TOM2AH3	1.68	0.74	0.72	2.33	1.64	1.45	2.47	1.84	1.83	1.46	2.43	1.51
ncbi_101760384	NUP1	32.18	43.83	38.09	24.43	27.95	28.53	25.03	26.34	28.31	28.39	26.56	26.03
ncbi_101760437	PCMP-E64	40.02	48.48	27.33	33.15	17.91	32.22	11.76	17.27	19.47	2.4	1.41	3.49
ncbi_101760448	WAK2	47.28	58.69	27.55	20.01	27	38	15.37	34.14	33.43	5.93	11.26	10.57
ncbi_101760450	--	49.27	50.14	44.82	31.94	24.66	23.81	7.97	13.12	12.21	6.42	7.4	5.02
ncbi_101760542	DCP5	28.44	29.1	27.87	23.64	26.51	23.64	21.82	24.88	24.33	23.15	23.18	20.68
ncbi_101760547	At1g04390	3.71	2.77	4.55	5.5	7.72	6.73	5.38	5.03	4.58	7.66	7.94	5.61
ncbi_101760568	NDT2	17.9	15.83	19.71	11.93	14.48	14.54	10.59	13.48	11.58	11.15	11.59	10.6
ncbi_101760628	--	6.23	7.15	7.11	5.04	6.23	4.96	6.33	5.7	6.59	5.76	5.13	6.26
ncbi_101760703	CRTISO	2.79	2.65	2.73	1.9	2.24	3.31	1.97	3.2	1.63	2.12	2.34	1.2
ncbi_101760718	TPIP1	641.74	811.48	456.69	514.19	403.15	572.65	250.55	383.27	397.43	57.55	108.32	140.22
ncbi_101760743	INRPK1	6.99	6.33	6.15	4.61	4.52	3.28	4.34	3.77	3.15	1.97	2.35	1.66
ncbi_101760746	--	3.97	3.09	4.59	5.68	5.74	5.09	7.1	6.57	5.86	9.13	8.74	8.37
ncbi_101760787	PP2C53	9.05	6.46	10.4	11.98	15.48	13.14	12.12	12.35	12.62	15.81	17.05	15.99
ncbi_101760788	GRSF1	38.14	33.78	44.35	38.27	47.72	41.07	51.45	43	38.3	41.67	44.59	49.56
ncbi_101760901	Os07g0671000	10.84	8.25	6.35	15.39	12.72	14.2	20.42	6.5	4.63	16.57	17.42	13.81
ncbi_101760922	--	0	0.07	0.5	0.97	1.29	1.13	0.98	0.71	0.29	1.28	1.19	1.13
ncbi_101760953	dnaJ	58.42	67.12	35.71	33.01	14.62	29.22	15.18	15.72	12.79	7.19	10.51	6.32
ncbi_101761052	RPM1	103.92	130.88	85.46	56.42	60.06	73.78	28.21	59.6	60.81	10.9	16.3	12.83
ncbi_101761082	At3g48880	75.86	94.42	58.92	56.61	37.9	38.48	50.65	57.91	52.99	27.58	36.63	32.52
ncbi_101761160	NEDP1	1.06	1.17	0.99	2.18	1.64	1.98	1.5	1.82	1.89	1.5	1.99	1.99
ncbi_101761172	CDI	6.38	7.96	8.3	4.47	3.27	3.32	0.17	1.93	2.98	0.23	0.34	0.15
ncbi_101761202	RGA5	5.31	2.53	3.99	10.17	6.77	8.45	9.46	5.95	5.42	7.68	9.02	7.48
ncbi_101761337	CML15	276.38	321.7	295.32	226.46	208.3	352.76	216.06	246.33	255.32	154.67	238.35	239.39
ncbi_101761344	RLCK176	11.73	9.54	11.18	18.04	18.8	18.02	20.25	15.66	14.7	21.32	21.59	20.85
ncbi_101761383	Os01g0513100	28.66	33.48	30.67	21.71	26.69	28.08	13.2	18.94	20.75	7.7	9.09	10.31
ncbi_101761434	--	3.21	1.99	2.78	4.97	5.41	4.55	5.16	4.68	4.07	6.56	5.92	5.73
ncbi_101761480	CHMP1	178.83	179.11	185.11	179.1	141.33	154.27	101.38	143.15	123.95	72.18	100.77	88.71
ncbi_101761493	UBC26	13.97	16.23	16.97	9.98	12.24	11.62	13.65	12.5	12.61	9.7	13.83	9.93
ncbi_101761523	SCL8	52.14	64.22	53.81	25.29	19.32	38.8	32.27	37.09	37.35	8.5	12.42	14.01
ncbi_101761597	rnf-5	156.81	208.16	148.36	110.86	95.02	118.46	97.51	102.36	107.66	58.3	65.32	67.06
ncbi_101761636	At4g29360	11.35	19.9	10.55	5.49	8.51	8.85	3.65	4.06	5.72	0.46	1.39	0.88
ncbi_101761637	At3g26922	0.36	0.32	0.7	0.54	1.1	0.76	1.76	1.18	0.92	1.79	1.43	1.58
ncbi_101761664	--	6.88	3.94	6.01	7.64	8.59	6.07	13.06	8.24	6.89	12.47	12.18	13.17
ncbi_101761776	SLC25A44	231.58	247.46	224.07	158.07	156.76	140.64	45.53	77.17	79.45	18.82	17.82	23.01
ncbi_101761869	At1g04430	21.94	29.04	31.17	14.62	19.54	18.45	10.57	15.29	20.59	7.85	8.36	9.43
ncbi_101761885	RBP47B'	7.14	5.91	8.81	7.59	9.55	9.27	17.63	14	14.32	18.38	17.53	18.63
ncbi_101762053	DI19-3	194.62	248.75	243.84	105.26	116.44	167.74	118.68	174.13	197.82	67.09	124.69	94.76
ncbi_101762056	PBB1	50.34	48.76	54.12	56.17	61.52	53.63	83.52	71.34	72.5	92.55	81.48	79.87
ncbi_101762288	RING1	11.34	10.12	11.63	17.89	13.87	14.32	17.87	15.89	12.22	16.94	17.27	17.4
ncbi_101762302	EREL1	32.89	31.6	31.04	25.19	26.08	26.28	18.71	24.95	30	17.66	16.77	15.81
ncbi_101762305	MAF1	0.56	0	0.51	1.09	1.74	1.51	4.25	3.3	2.78	4.73	2.68	5.2
ncbi_101762342	CCR4	11.41	11.38	7.7	11.06	6	8.16	2.46	4.71	4.88	1.12	1.44	1.04
ncbi_101762369	SF1	13.9	13.03	14.76	15.75	17.46	18.71	22.3	19.21	17.66	21.5	21.48	22.14
ncbi_101762402	MTK1	36.36	39.49	42.33	55.72	62.86	61.75	55.55	57.72	46.89	69.8	68.06	54.57
ncbi_101762477	Os01g0928800	21.45	24.61	22.33	15.84	17.76	23.03	18.04	17.89	16.62	14.76	14.4	14.03
ncbi_101762599	--	2.65	2.24	2.67	1.69	1.76	1.78	1.76	2.45	2.28	1.41	1.44	1.51
ncbi_101762613	ATI1	20.57	14.14	21.14	19.27	30.73	25.45	29.3	20.47	20.64	28.99	25.76	33.55
ncbi_101762627	sidJ	6.25	5.47	8.69	9.12	10.01	8.18	12	12.13	11.49	14.11	12.83	12.14
ncbi_101762641	--	10.69	6.99	7.81	10.33	11.93	9.55	15.32	10.14	9.08	14.61	13.43	12.68
ncbi_101762697	OPR1	84.58	90.04	20.71	47.91	16.39	28.22	22.77	64.53	32.34	6.26	4.93	4.53
ncbi_101762728	CALS12	57.69	65.72	42.61	65.69	43.13	45.22	17.11	25.6	23.36	6.13	6.92	5.98
ncbi_101762745	BRD4	6.1	4.13	5.63	7.49	9.88	8.49	8.99	7.97	7.83	10.57	9.8	8.05
ncbi_101762746	TTG1	104.13	102.29	68.2	61.85	29.27	52.85	35.64	53.89	56.55	11.86	24.81	18.45
ncbi_101762751	MBR2	0.78	0.95	1.62	1.67	1.74	2.41	2.78	1.66	2.14	2.82	2.65	3.11
ncbi_101762832	HEMA1	340.49	341.05	259.41	296.54	280.03	264.4	147.62	192.7	197.01	153.43	156.04	151.3
ncbi_101762845	CRPK1	149.76	159.29	132.17	98.87	81.49	100.46	31.25	44.6	55.35	13.47	15.13	15.52
ncbi_101762917	--	11.99	16.3	12.24	12.59	6.94	8.35	3.78	5.57	7.02	0.81	1.48	1.57
ncbi_101762931	GAUT4	17.26	24.98	26.99	8.45	12.97	12.66	9.23	18.26	21.74	10.09	8.94	10.94
ncbi_101762974	ATPK2	61.53	59.86	61.33	105.31	131.05	104.93	112.99	82.99	58.34	140.13	103.74	95.26
ncbi_101763037	APSR1	5.49	4.84	4.7	7.61	6.92	6.09	8.16	6.75	6.61	9.41	7.64	7.95
ncbi_101763114	IRX14	211.99	260.48	224.48	157.76	134.39	168.26	128.03	156.02	164.12	55.84	96.26	75.78
ncbi_101763125	--	2.65	3.02	2.4	4.79	5.95	4.62	6.89	5.77	4.85	6.76	6.13	6.24
ncbi_101763248	CBL1	73.14	84.83	83.79	54.95	55.41	54.56	40.13	53	54.54	23.9	28.02	26
ncbi_101763255	--	87.75	84.59	78.6	65.86	75.72	68.95	54.84	59.17	54	32.76	42.62	39.11
ncbi_101763256	BIG1	41.6	43.82	32.16	35.81	32.81	28.61	17.28	21.19	20.9	13.99	15.55	12.18
ncbi_101763277	IDD11	10.24	7.6	7.64	11.85	11.01	10.15	10.59	12.73	10.91	13.17	11.16	16.19
ncbi_101763305	JMJ16	3.21	3.24	4.43	5.26	6.8	6.5	5.32	5.37	4.94	7.48	6.38	6.34
ncbi_101763352	RGA5	1.58	2.19	2.42	1.63	1.9	1.46	1.1	1.26	1.89	1.37	1.82	1.05
ncbi_101763397	--	9.5	15.57	11.34	4.57	6.04	11.87	3.57	5.76	5.7	1.58	3.67	2.67
ncbi_101763410	CBSX6	11.93	9.95	9.92	15.75	16.29	15.26	21.63	16.31	17.56	23.52	23.6	22.68
ncbi_101763430	At4g11680	9.34	8.75	12.27	12.5	16.15	15.16	20.92	18.4	16.98	22	19.92	24.68
ncbi_101763456	PI4KG7	20.92	16.22	15.98	13.7	15.67	16.28	13.38	13.21	16.33	13.1	14.04	14.08
ncbi_101763460	URGT2	470.05	603.73	423.49	321.76	293.73	412.91	142.17	197.14	183.41	42.55	58.93	62.73
ncbi_101763508	--	1.04	0.98	1.01	0.11	0.24	0	0.63	0	0.01	0.19	0.17	0.48
ncbi_101763510	OPR5	84.26	84.53	25.86	50.13	15.11	38.79	10.9	31.72	16.98	6.01	4.64	3.57
ncbi_101763533	--	0.72	1.18	0.37	0.03	0.09	0.92	0.04	0.06	0	0	0	0
ncbi_101763547	ARP1	0.65	0.82	0.76	1.08	1.42	1.35	1.1	1.26	0.92	1.31	1.65	1.42
ncbi_101763559	Os02g0683500	0.86	0.89	0.82	0.46	0.8	0.65	0.58	0.61	0.73	0.63	0.6	0.47
ncbi_101763565	At1g76660	9.26	6.73	11.28	13.84	15.56	13.73	14.92	12.96	13.27	16.51	16.27	17.53
ncbi_101763567	ROG1	48.32	51.89	43.94	39.35	37.85	34.86	19.63	34.03	26.25	16.26	13.71	18.86
ncbi_101763581	MBD4L	4.1	3.83	5.84	5.05	5.16	5.94	8.71	6.91	6.79	9.21	9.2	8.77
ncbi_101763658	At3g26560	264.21	415.58	291.37	163.46	143.84	238.67	125.89	154.68	180.38	74.83	179.49	156.46
ncbi_101763821	--	58.54	55.16	43.43	37.44	41.4	42.36	22.81	34.85	53.66	27.32	30.59	30.58
ncbi_101763914	OPR5	110.8	124.92	54.23	78.46	31.71	74.67	26.33	65.17	24.51	5.88	4.97	2.78
ncbi_101763938	--	5.92	3.48	7.18	11.82	13.98	11.8	20.43	13.7	13.02	29.84	18.3	24.32
ncbi_101764029	--	105.12	174.2	106.47	44.7	63.54	92.37	47.83	70.57	94.72	18.43	33.89	15.59
ncbi_101764080	DDR4	2.92	3.08	4.88	5.08	5.28	4.54	7.86	7.4	6.7	9.28	8.83	10.85
ncbi_101764166	FIP1	77.16	108.36	102.59	49.71	53.23	61.32	50.24	50.75	57.47	22.24	22.78	27.32
ncbi_101764231	DGK7	40.32	44.2	36.58	34.98	32.41	35.22	24.49	25.49	25.47	23.36	24.36	24.23
ncbi_101764262	H2B.2	10.75	9.79	12.01	14.11	19.56	16.96	25.02	21.89	15.02	30.81	29.83	30.12
ncbi_101764336	At5g63020	32.44	52.34	42.82	17.01	22.84	35.1	13.04	27.01	24.88	4.88	16.16	7.29
ncbi_101764385	--	5.57	8.71	9.37	3.55	5.94	4.59	1.6	2.87	4.19	1.26	1.45	2.94
ncbi_101764449	CLC-D	33.05	30.6	30.85	27.29	26.8	30.54	27.26	30.59	28.88	29.31	29.18	24.93
ncbi_101764468	MPK12	656.56	960.87	574.75	590.77	564.64	612.47	60.41	159.11	216.8	14.3	20.35	21.12
ncbi_101764486	FRL4A	1.65	1.65	2.82	2.68	3.68	3.01	4.97	4.21	4.43	5.03	5.3	4.88
ncbi_101764496	RGLG2	848.89	1022.79	624.35	776.01	593.75	732.92	149.68	258.47	224.66	38.64	48.18	59.19
ncbi_101764593	--	4.12	3.06	3.98	2.57	3.42	1.97	1.68	2.98	2.95	2.4	1.75	1.71
ncbi_101764623	PUB43	5.57	7.12	4.67	1.65	3.07	7.34	1.97	4.93	4.78	0.74	1.87	2.51
ncbi_101764698	PRA1A1	38.11	40.05	33.73	31.99	32.66	29.76	33.22	31.37	34.18	27.85	33.37	23.84
ncbi_101764753	PDX11	54.41	29.48	32.5	119.49	131.72	103.34	101.58	87.44	56.25	140.94	105.54	136.67
ncbi_101764758	MYB2	9.29	13.79	17.2	5.19	7.09	6.57	3.73	9.14	11.96	1.51	1.81	1.68
ncbi_101764826	RPM1	23.23	29.49	20.32	11.85	14.41	16.15	9.96	16.89	16.29	2.51	1.65	3.61
ncbi_101764887	HHT1	1.59	2.03	2.44	0.11	0.71	0.48	0.24	0.38	0.67	0.18	0.04	0.13
ncbi_101764890	HRD3	19.95	19.21	20.83	24.05	28.19	26.68	24.18	24.9	25.36	28.8	27.69	27.09
ncbi_101764947	FTIP3	28.73	23.75	28.74	29.64	41.26	37.61	50.04	51.63	53.46	63.28	56.86	65.7
ncbi_101765037	Os01g0870100	3.87	2.25	5.21	7.77	8.5	9.16	8.68	5.58	5.13	8.99	8.73	6.33
ncbi_101765038	--	79.69	163.22	91.03	120.83	57.8	71.48	48.31	79.17	77.25	66.08	71.35	64.48
ncbi_101765094	GL1-9	2.95	3.64	3.64	8.27	8.5	8.57	6.48	6.38	5.02	9.33	6.19	8.79
ncbi_101765137	DRT111	7.65	6.34	7.67	8.65	9.15	8.84	8.99	8.42	9.01	9.19	8.23	8.03
ncbi_101765310	--	1.43	0.88	2.23	4.37	8.25	5	7.78	3.32	5.74	11.49	8.35	14.93
ncbi_101765340	ergic3	32.62	36.19	36.59	26.6	27.7	23.48	18.85	23.27	22.84	18.57	17.87	16.68
ncbi_101765396	--	32.18	38.97	42.64	23.88	22.77	23.68	24.68	29.49	33.17	19.32	20.65	17.85
ncbi_101765402	EIF1AY	134.45	101.13	109.01	197.7	183.9	160.29	238.58	230.81	168.1	247.15	235.2	228.17
ncbi_101765481	--	111.65	187.28	90.65	46.89	70.49	100.96	93.25	80.54	70.11	25.75	43.43	51.31
ncbi_101765670	--	50.9	57.08	48.33	23.67	28.23	40.66	50.81	42.09	38.65	15.27	26.8	21.03
ncbi_101765781	NAC035	0.9	0.54	1.12	1.87	2.16	2.06	4.51	2.77	2.56	5	4.41	5.64
ncbi_101765800	SYP43	7.7	5.7	10.05	7.58	13.13	9.58	13.48	10.33	10.75	11.81	10.67	9.78
ncbi_101765897	ERF4	143.05	148.98	237.32	130.33	269.98	254.6	305.6	241.27	200.7	223.4	261.04	284.16
ncbi_101765977	TKI1	4.45	3.25	6.12	8.13	7.36	6.13	11.32	7.8	5.56	10.46	11.37	11.03
ncbi_101766022	ASIL2	102.26	97.64	90.29	67.99	47.22	65.98	38.75	54.86	58.49	14.65	24.21	15.71
ncbi_101766107	--	1.21	1.81	1.29	0.64	0.88	0.95	0.24	0.71	0.7	0.07	0.1	0.09
ncbi_101766162	CRK35	39.46	42.77	35.19	21.75	13.67	16.08	22.99	32.06	28.8	6.97	6.03	10.39
ncbi_101766172	SPAPJ696.02	22.2	19.97	27.57	27.37	33.85	28.98	27.44	23.08	20.35	32.88	32.95	33.7
ncbi_101766196	NSP2	0.82	0.38	0.87	2.74	0.74	1.48	1.67	1.82	0.92	2.17	2.52	1.45
ncbi_101766277	ARL8C	21.44	22.38	25.66	29.59	29.82	29.94	37.85	35.34	31.02	43.92	40.69	41.89
ncbi_101766369	Os02g0639900	3.75	3.71	4.91	4.66	5.66	6.18	11.14	8.91	7.79	12.57	11.73	12.95
ncbi_101766370	PAO	99.71	53.34	78.14	364	154.74	179.51	312.22	151.49	94.85	295.83	265.14	175.46
ncbi_101766455	--	6.54	6.19	8.61	14.69	17.79	15.5	12.6	11.47	12.93	17.64	21.39	13.05
ncbi_101766661	PCO5	15.45	10.91	12.78	18.34	19.4	17.68	17.75	17.01	17.21	20.68	17.92	16.33
ncbi_101766673	LWD1	3.19	1.76	2.98	2.82	5.02	3.58	5.07	5.23	4.3	6.16	6.83	6.42
ncbi_101766676	LRK10L-2.8	8.24	12.57	7.61	7.16	6.33	6.09	3.83	4.93	3.81	1.31	1.43	1.42
ncbi_101766684	PUB8	26.01	28.36	20.07	22.3	17.57	21.52	22.84	21.01	17.61	13.61	19.77	17.11
ncbi_101766825	CUL1	9.06	7.3	8.19	9.89	11.78	6.96	10.18	8.63	7.79	11.49	7.09	11.3
ncbi_101766880	Os05g0495700	114.25	80.58	84.59	77.65	53.81	53.89	12.91	38.55	38.84	3.43	6.32	6.13
ncbi_101766891	XTH30	1.77	1.07	1.29	3.09	2.91	3.07	6.9	4.31	2.88	7.59	5.62	6.74
ncbi_101766936	LRK10	1.21	0.63	0.59	0.9	1.2	1.76	1.3	0.6	0.81	1.26	0.41	2.14
ncbi_101766953	COL5	17	16.24	16.38	14.43	23.91	30.75	27.35	22.48	21.9	23.12	27.66	31.83
ncbi_101766954	CRPK1	133.45	163.76	119.9	82.84	61.58	89.72	42.46	75.53	72.46	19.12	30.17	27.35
ncbi_101767070	--	6.01	4.07	6.31	6.87	7.92	6.67	8.38	8.92	7.88	9.93	10.09	9.15
ncbi_101767077	NAC048	405.53	264.75	275.21	508.07	326.38	363.25	469.76	385.39	347.13	289.91	432.15	416.92
ncbi_101767300	HSFA1	21.73	19.48	24.8	26.23	34.77	28.45	29.92	26.9	23.73	31.36	31.92	36.64
ncbi_101767393	CIGR2	1613.46	1623.22	1284.51	1279.38	1044.4	1275.61	451.11	630.24	682.5	213.01	458.19	373.54
ncbi_101767464	At4g00755	4.35	2.36	3.59	11.42	9.32	7.09	9.41	5.82	4.7	9.68	9.23	8.67
ncbi_101767500	MAG2	3.98	2.6	3.9	4.99	5.83	4.66	7.13	5.27	4.69	7.08	7.52	6.37
ncbi_101767558	--	1.76	1.15	1.78	0.88	0.57	0.82	0.57	1.65	2.15	0.9	1.37	0.25
ncbi_101767588	RHM1	233.27	341.49	326.39	239.07	210.61	239.42	90.83	160.93	172.37	33.86	70.51	53.06
ncbi_101767615	PIK-2	26.28	30.33	23.66	18.93	18.3	22.43	11.04	17.95	17.14	6.97	9.76	8.16
ncbi_101767621	Os01g0857700	17.15	15.09	20.97	19.09	24.66	20.09	21.56	20.48	19.65	24.95	21.7	24.67
ncbi_101767855	SRRM1	36.34	30.67	37.26	41.04	45.84	45.44	41.43	39.53	46.38	56.59	49.71	45.76
ncbi_101767924	OFUT35	81.53	102.89	70.16	58.1	54.92	65.4	22.01	48.26	62.06	10.57	13.02	13
ncbi_101767988	RHM1	18.61	28.2	22.46	19.13	12.39	18.46	5.79	10.61	13.8	0.82	3.92	1.78
ncbi_101768126	--	1.46	1.2	1.49	2.74	3.55	3.01	2.32	2.56	2.62	4.44	4.41	3.8
ncbi_101768155	NRPB5A	53.28	57.73	64.94	37.11	46.9	36.81	33.29	45.9	45.4	24.87	24.82	28.09
ncbi_101768383	B3GALT14	4.7	3.25	4.37	7.21	6.58	5.44	6.72	5	5.35	6.41	7.19	6.92
ncbi_101768452	CAR11	97.88	124.64	79.37	51.61	45.58	102.7	28.3	52.11	58.04	10.85	26.74	18.98
ncbi_101768468	HSL2	1.23	2.57	2.03	0.83	1.37	1.1	1.45	1.65	1.62	1.05	1.16	1.03
ncbi_101768605	Ankrd13b	9.52	9.09	11.07	13.23	17.13	14.03	15.67	13.75	16.83	18.49	18.39	18.21
ncbi_101768607	MJ1232	214.58	283.52	177.51	93.42	149.67	129.1	86.87	159.36	203.47	90.75	130.38	129.76
ncbi_101768617	SCL23	20.37	23.3	27.38	7.53	12.69	13.7	12.15	19.15	18.68	6.89	9.3	9.48
ncbi_101768651	STP7	40.71	46.95	34.98	28.45	21.65	25.06	14.28	24.84	28.29	3.7	10.46	10.63
ncbi_101768693	PYL3	17.17	15.29	19.83	21.76	33.26	30.62	24.59	23.77	29.7	33.57	28.51	31.47
ncbi_101768757	VPS60-1	113.06	135.56	110.31	98.64	108.42	95.1	85.43	90.87	90.66	69.98	76.37	64.2
ncbi_101768791	dap4	2.24	1.24	2.41	3.81	4.97	4.26	3.06	3.42	3.78	6.08	4.68	3.67
ncbi_101768804	JAR4	1.29	1.83	1.16	2.6	4.7	4.98	3.63	3.83	5.41	3.04	4.16	4.95
ncbi_101768863	PAO3	460.58	542.53	525.41	387.51	345.09	340.68	151.75	236.9	315.93	79.06	71.56	88.59
ncbi_101768865	PXC3	72.72	86.56	57.77	41.96	48.71	47.71	35.26	54.18	45.84	17.13	23.74	23.34
ncbi_101768946	--	7.97	5.22	9.18	8.47	9.81	7.45	13.2	10.97	11.03	13.56	13.18	12.92
ncbi_101768999	LARP6B	7.66	8.75	10.95	13.84	17.27	15.28	16.43	13.52	13.75	16.77	20.89	18.05
ncbi_101769025	HERK1	30.61	42.83	49.86	24.33	15.64	15.46	7.56	18.78	25.44	2.04	2.83	2.91
ncbi_101769072	LECRK2	2.7	4.06	2.76	1.43	6.12	5.04	6.09	4.99	2.89	4.32	3.98	7.28
ncbi_101769158	RPM1	32.38	37.48	30.35	22.54	23.01	25.34	11.31	20.8	23.85	10.81	13.01	12.86
ncbi_101769191	UGGT	31.99	36.12	32.91	22.44	26.14	26.88	24.79	30.21	33.22	24.48	25.23	21.4
ncbi_101769273	KIN7E	0.78	0.84	0.85	2.29	1.65	1.57	1.6	1.68	1.83	1.75	1.7	1.7
ncbi_101769332	-	48.49	52.64	40.11	40.76	39.2	37.67	24.25	27.6	29.62	22.65	22.15	19.65
ncbi_101769443	ACX2	2.67	2.02	2.23	9.14	7.04	6.47	12.09	2.77	2.61	9.36	12.91	4.68
ncbi_101769460	Rbp6	11.02	17.93	9.49	2.93	4.07	4.89	2.28	6.73	5.89	1.28	1.96	2.47
ncbi_101769516	PUB4	40.89	44.92	34.63	32.54	30.31	37.27	16.26	20.64	20.7	15.49	15.84	15.32
ncbi_101769522	ILR3	70.6	61.56	77.28	70.54	82.23	72.84	92.71	91.26	89.57	100.92	103.27	103.15
ncbi_101769567	-	131.9	167.47	133.86	94.1	113.14	110.63	41.85	70.34	77.61	18.96	22.51	24.77
ncbi_101769577	SNL6	0.08	0.39	0.59	0.58	0.71	0.88	0.55	0.99	0.79	1.13	0.93	0.86
ncbi_101769588	VIP5	6.59	5.61	8.18	7.84	8.2	8.72	11.39	10.28	8.84	13.3	12.29	12.75
ncbi_101769593	NAR1	10.06	6.93	9.84	15.18	14.17	13.26	13.05	10.42	10.89	16.69	13.48	14.63
ncbi_101769656	--	3.42	3.38	5.11	7.31	8.13	7.4	6.86	5.4	3.5	9.9	7.39	6.89
ncbi_101769687	MED26B	95.52	124.79	141.63	59.41	59.66	66.69	61.18	91.17	86.85	53.61	67.22	60.21
ncbi_101769709	ICR2	2.55	1.87	4.02	4.11	6.52	5.4	8.12	8.2	9.24	12.03	12.15	11.47
ncbi_101769721	--	158.04	193.77	187.57	122.74	139.65	133.8	56.8	89.63	102.9	29.32	34.98	45.48
ncbi_101769773	PDPK2	4.76	4.62	5.99	5.77	7.6	7.83	11.86	8.22	8.72	12.04	12.55	11.53
ncbi_101769825	RNP1	106.08	121.17	123.67	58.43	65.95	63.88	22.86	47.01	50.73	39.68	42.72	38.88
ncbi_101769924	BC10	114.89	166.24	163.06	76.54	92.65	153.56	53.64	67.01	76.74	25.31	47.45	46.31
ncbi_101769956	UGT73D1	4.44	2.72	2.38	18.03	10.87	12.05	7.92	9.86	8.99	16.91	15.77	12.57
ncbi_101770062	RNP1	39.87	37.47	40.38	25.81	33.34	30.15	28.23	32.6	30.57	27.98	26.6	24.34
ncbi_101770112	At1g11330	560.34	919.19	667.32	514.56	567.01	628.53	162.39	306.76	312.42	44.94	117.4	110.75
ncbi_101770198	CPK13	38.23	47.96	43.81	30.78	36.57	30.85	16.62	26.09	29.48	13.28	14.2	14.13
ncbi_101770204	IPN2	1.77	1.82	2.29	3.68	6.97	4.94	11.94	8.41	7.15	11.6	9.16	11.38
ncbi_101770262	--	1.03	0.72	1.44	1.54	2.23	1.96	1.43	1.82	2.26	2.57	2.19	2.88
ncbi_101770306	At3g47200	15.31	24.2	20.37	9.7	9.57	17.11	8.52	12.42	8.84	3.51	6.86	5.17
ncbi_101770401	ACD11	20.63	16.31	21.97	23.43	26.24	22.84	29.75	28.48	29.01	30.89	30.16	28.58
ncbi_101770450	--	4.32	5.66	3.59	8.45	7.16	9.56	10.38	7.66	4.44	13.11	12.04	8.98
ncbi_101770523	NAT3	20	21.92	15.59	28.54	25.38	23.79	25.8	28.89	30.63	31.99	29.4	30.43
ncbi_101770570	--	1.06	2.82	2.76	1.19	0.97	1.24	0.71	1.6	1.86	0.63	1.3	0.71
ncbi_101770572	RPT4B	55.27	43.44	57.01	62.27	70.47	65.98	79.74	74.1	76.87	86.67	82.49	86.2
ncbi_101770650	--	5.54	5.28	7.84	7.36	7.74	6.89	10.09	6.71	7.79	9.13	8.84	9.66
ncbi_101770743	KRP1	229.23	222.07	180.83	184.22	145.6	199.23	112	104.27	108.53	34.91	70.4	59.63
ncbi_101770766	ABCG28	211.12	223.8	161.71	188.52	154.23	166.81	87.75	124.53	134.23	36.83	51.16	54.36
ncbi_101770800	RPP8L3	35.97	72.82	47.41	16.22	23.18	26.88	7.53	19.24	18.1	3.34	3.6	4.34
ncbi_101770944	NERD	18.69	21.26	22.27	15.38	15.09	14.31	9.41	11.35	11.91	10.32	10.72	8.83
ncbi_101770975	--	2.37	3.53	3.04	4.06	5.95	5.88	4.65	5.31	5.57	5.5	7.14	6.69
ncbi_101770994	SOG1	2.47	4.15	4.44	1.71	1.2	2.08	0.56	1.79	2.59	0.2	0.36	0.07
ncbi_101771027	HVA22K	13.82	13.75	16.76	18.91	18.15	15.76	18.29	18.29	17.34	21.61	20.36	20.62
ncbi_101771046	DHNAT1	1.3	1.77	0.55	4.34	4.27	4.16	3.17	2.52	2.16	4.71	4.06	3.86
ncbi_101771093	--	7.58	7.17	12.79	16.78	20.8	19.06	34.85	24.14	18.34	31.97	38.74	30.43
ncbi_101771148	--	4.23	3.41	4.85	3.66	5.8	5.04	4.89	5.12	5.21	5.44	2.85	6.22
ncbi_101771165	HIP1	18.38	15.55	25.58	26.77	36.63	35.3	44.97	29.84	24.83	47.6	43.59	44.46
ncbi_101771199	LTA3	10.46	8.79	11.2	12.05	14.22	13.88	16.59	15.85	15.6	18.69	16.92	15.83
ncbi_101771245	--	0.34	0.09	0.23	0.4	0.59	0.44	0.88	0.84	0.63	1.11	1.02	0.82
ncbi_101771290	PBL19	71.61	99.98	107.27	22.69	19.7	30.96	23.33	29.84	42.14	13.4	23.02	16.78
ncbi_101771307	BLH1	33.89	28.85	38.49	38.1	63.41	56.76	77.76	66.29	70.54	89.51	84.57	90.52
ncbi_101771450	MYB308	19.8	25.06	23.61	8.44	16.12	13.13	3.38	9.54	12.22	1.32	1.71	3.55
ncbi_101771477	HHP2	7.95	7.35	6.02	5.55	3.68	6.53	1.39	3.78	3.25	0.76	0.96	0.85
ncbi_101771510	ATG18G	21.32	20.35	26.91	28.61	36.34	34.11	44.04	27.93	24.19	46.66	43.99	33.08
ncbi_101771560	EMB2261	1.79	1.64	2.14	1.5	1.21	0.98	0.42	0.84	1.42	0.43	0.45	0.32
ncbi_101771601	--	14.07	14.22	18.42	15.86	26.9	20.42	18.13	20.05	21.27	21.37	22.2	22.67
ncbi_101771698	At1g52620	0.38	0.09	0.22	1.45	0.13	0.71	0.68	0.88	0.68	0.92	0.99	0.94
ncbi_101771745	FAD7	589.68	588.13	417.54	439.12	376.59	447.83	106.89	181.09	227.66	92.66	108.85	132.91
ncbi_101771827	--	2.99	3.31	3.01	3.97	5.37	4.29	7.79	6.98	6.89	8.73	8.06	10.96
ncbi_101771859	DTX42	8.89	7.72	9.56	10.83	12.13	12.07	12.75	12.64	10.44	14.89	14.61	13.18
ncbi_101771914	SNAP33	413.01	512.79	450.38	317.13	341.18	483.52	166.93	214.55	200.1	54.96	104.5	96.71
ncbi_101771922	--	2.88	4.06	4.54	4.31	6.94	6.13	7.16	4.63	5.06	7.61	6.92	5.63
ncbi_101772084	Os04g0447100	470.19	579.49	448	338.12	270.53	279.51	233.57	402.03	449.59	93.71	100.58	135.81
ncbi_101772173	DDB_G0289029	155.82	181.96	128.96	101.65	76.62	98.33	64.03	87.93	89.63	33.43	47.03	38.54
ncbi_101772197	THI2	0.02	29.71	0.02	0	0	0	0	0	0	0	0	0
ncbi_101772243	MAPKKK3	337.11	330.84	225.36	297.02	182.37	183.76	113.54	181.36	156.57	73.25	89.95	98.35
ncbi_101772353	CESA6	16.5	42.53	52.87	8.72	14.46	15.07	5.81	19.15	37.07	1.53	2.64	1.51
ncbi_101772407	ILA	18.55	23.41	22.61	17.67	17.43	19.33	16.01	21.26	22.73	20.16	21.8	15.14
ncbi_101772410	CAT2	8.77	9.41	10.58	10.05	11.64	11.6	11.83	11.78	10.38	12.56	13.33	11
ncbi_101772472	Os02g0793000	1.88	1.25	2.53	2.5	4.5	3.29	5.19	5.76	5.3	7.88	6.17	5.93
ncbi_101772497	Kdelr3	35.38	31.28	39.64	37.76	44.47	40.56	49.79	53.18	51.62	57.41	52.87	55.12
ncbi_101772519	VDAC2	13.49	14.32	19.37	22.59	27.14	25	33.43	30.46	24.9	38.88	34	38.24
ncbi_101772544	PHR1	19.01	18.01	18.26	22.51	22.71	21.57	20.59	24.47	26.47	22.96	25.51	23.86
ncbi_101772582	--	0.63	0.1	0.82	1.42	3.59	1.36	6.35	2.44	2.14	6.49	4.14	5.39
ncbi_101772664	SAR1A	15.49	16.22	19.32	24.75	32.42	24.88	38.79	30.05	27.53	37.58	36.72	35.01
ncbi_101772666	At4g33300	101.13	60.37	54.48	125.78	121.91	107.48	179.85	103.11	78.65	221	158.05	178.08
ncbi_101772725	Os02g0150100	4.62	2.65	5.38	5.85	7.01	5.24	8.92	7.3	6.12	10.8	9.5	9.03
ncbi_101772741	At2g01680	8.83	8.93	11.68	10.65	16.49	15.11	26.32	26.33	27.65	32.03	33.28	32.98
ncbi_101772773	--	7.32	5.6	9.96	6.71	12.81	11.59	13.5	11.11	9.85	10.92	9.98	12.97
ncbi_101772809	PEX13	129.9	149.64	99.94	70.34	58.73	64.38	49.21	73.67	66.26	38.1	45.34	38.14
ncbi_101772843	BHLH149	0.82	0.28	0.6	1.03	2.05	0.71	0.83	1.32	0.64	1.73	0.67	1.39
ncbi_101772852	Os09g0127800	13.76	14.13	18.46	19.06	21.59	18.09	17.7	20.88	23.29	24.16	21.06	21.93
ncbi_101772925	RGA5	13.01	21.81	20.8	11.14	13.2	14.14	7.88	11.53	13.63	5.88	8.21	4.71
ncbi_101772958	CIGR2	123.55	134.68	118.53	95.7	91.99	105.32	39.23	43.8	47.67	30.79	30.53	31.64
ncbi_101773069	GPA3	14.03	13.76	15.63	11.42	12.3	12.24	13.28	13.1	12.21	10.5	11.7	12.77
ncbi_101773109	BEL1	69.45	79.76	74.42	44.8	48.9	55.07	39.97	49.35	60.09	23.15	25.29	29.25
ncbi_101773130	At3g47200	11.07	18.31	13.89	2.82	4.74	5.26	5.14	11.09	7.99	1.4	3.22	5.08
ncbi_101773137	SFH8	182.87	207.66	172.96	143.92	127.47	142.01	40.17	62.16	69.91	14.7	23.82	20.91
ncbi_101773144	Os02g0567200	37.3	43.04	38.72	29.3	29.16	29.37	14.1	27.76	24.7	11.33	16.78	15.27
ncbi_101773170	RPM1	14.06	19.68	15.79	6.59	8.05	11.17	8.65	11.85	11.41	5.63	4.68	8.84
ncbi_101773200	CRK40	105.68	148.41	130.32	81.94	108.19	113.91	37.39	69.75	86.31	9.84	38.63	16.02
ncbi_101773261	At2g16710	22.68	22.9	30.34	39.22	42.64	36.65	53.54	37.08	38.46	60.75	46.94	49.92
ncbi_101773269	WAK2	6.57	4.96	3.9	7.89	8.77	8.75	10.49	9.94	6.67	8.57	10.44	9.83
ncbi_101773398	CAMTA4	91.62	113.42	76.92	51.73	75.05	58.31	11.19	25.38	39.03	5.18	6.06	4.98
ncbi_101773405	Os02g0506500	33.25	23.4	31.78	18.69	19.66	19.97	18.73	21.14	17.63	21.52	20.99	17.89
ncbi_101773501	--	5.52	9.31	8.82	5.09	4.86	6.69	5.85	6.11	5.11	2.8	5.16	4.55
ncbi_101773631	FLXL1	6.55	5.53	6.8	7.74	9.77	10.32	10.66	9.81	10.09	11.11	14.56	13.57
ncbi_101773690	Alg13	3.82	3.71	5.11	4.61	6.77	6.95	5.94	6.51	5.06	6.58	7.61	6.55
ncbi_101773755	Os11g0515500	10.11	8.24	9.47	10.03	12.56	11.73	13.24	10.7	12.16	11.96	15.1	13.37
ncbi_101773852	PDLP8	11.75	26.25	16.73	4.67	3.85	7.2	7.36	10.43	13.25	4.72	7.31	6.9
ncbi_101773964	PIGC	0.22	0.47	0.58	1.13	1.2	0.88	1.06	1.51	0.73	1.11	1.55	1.96
ncbi_101774003	plyB	19.98	22.87	22.15	20.45	18.74	16	4.64	7.38	9	2.78	3.19	3.6
ncbi_101774052	Os06g0171800	2.28	1.71	1.58	3.46	3.53	4.1	3.78	3	2.85	3.61	4.01	2.55
ncbi_101774058	PAPS3	9.31	12.41	12.35	7.26	8.75	7.46	5.19	6.4	7.94	4.05	3.67	3.68
ncbi_101774095	CYCT1-1	238.86	278.54	254.26	146.52	142.49	187.86	131	167.03	170.88	51.91	125.7	84.69
ncbi_101774108	FUT1	53.78	73.42	58.73	37.6	41.51	56.66	24.95	46.38	45.81	12.39	20.4	16.83
ncbi_101774130	At1g51810	11.62	16.73	8.94	5.6	6.46	4.61	3.34	5.85	5.17	0.88	2.68	1.25
ncbi_101774166	RPPL1	47.37	77.34	46.91	25.2	24.18	40.26	16.09	28.43	28.11	3.66	12.33	7.66
ncbi_101774167	RGA4	11.45	12.99	7.44	3.66	7.65	6.88	4.68	5.52	7.46	4.75	13.55	2.22
ncbi_101774253	CBT	102.88	109.62	87.08	82.93	96.55	75.5	58.53	60.79	66.52	36.83	38.22	35.87
ncbi_101774257	ACX4	36.63	31.44	29.14	60.48	49.84	49.81	65.82	44.11	52.53	67.76	67.67	57.14
ncbi_101774301	--	844.17	902.88	735.18	474.95	448.74	528.17	302.51	430.61	448.31	94.5	198.06	207.28
ncbi_101774371	WRKY4	8.78	7	9.81	9.2	12.13	10.19	20.12	16.32	15.56	18.09	18.21	19.46
ncbi_101774445	--	2.28	1.14	3.29	2.64	3.5	3.04	3.33	2.84	3.2	4.46	2.35	2.89
ncbi_101774509	VAMP714	7.96	8.01	9.32	9.22	12.6	9.38	15.37	14.7	13.63	17.06	15.52	18.42
ncbi_101774516	PLP2	184.04	369.85	254.86	56.3	98.7	103.9	129.86	148.95	127.6	25.74	62	53.53
ncbi_101774584	ACR4	11.71	7.92	10.08	31.96	33.4	28.31	25.42	20.97	27.35	40.87	32.81	37.88
ncbi_101774711	STA1	9.21	8.41	9.62	11.78	12.84	11.35	10.82	10.51	11.14	15.22	12.5	13.66
ncbi_101774733	ACA10	273.62	517.84	317.56	278.97	226.24	289.62	70.88	137.22	146	25.55	47.85	36.75
ncbi_101774810	PLC6	97.39	106.44	103.14	81.21	83.01	59.17	17.31	31.37	42.96	9.76	11.7	11.4
ncbi_101774832	Os11g0242200	1.01	1.56	0.56	0.5	0.87	0.66	0.23	0.53	0.67	0	0.07	0.16
ncbi_101774839	VIL1	18.34	21.66	17.87	18.46	18.5	18.01	17.24	18.49	17.89	17.31	17.34	14.95
ncbi_101774888	--	4.95	2.58	3.55	7.2	9.03	5.45	8.28	7.89	7.43	10.29	8.52	8.97
ncbi_101775011	NPF1.2	14.64	16.34	18.22	7.42	8.77	11.47	4.03	11.65	18.01	2.84	4.52	8.35
ncbi_101775050	--	2.88	5.6	3.88	2.19	2.93	2.76	0.86	2.61	3.46	1	1.52	1.43
ncbi_101775066	ZIP6	22.62	25.32	24.35	14.45	17.57	19.34	13.6	16.29	14.72	5.84	7.53	9.53
ncbi_101775083	--	3.87	3.39	4.36	4.38	7.48	7.03	7.02	6.03	5.09	8.13	6.34	7.43
ncbi_101775100	LOG2	92.2	130.65	109.45	64.53	61.69	70.8	36.73	60.39	58.74	13.29	25.02	17.52
ncbi_101775159	CLPX3	10.02	7.34	11.37	13.65	19.7	14.09	15.11	12.93	12.16	16.72	19.86	23.55
ncbi_101775226	--	1.96	3.04	3.34	3.61	3.94	4.5	3.57	3.7	3.42	3.85	4.99	4.94
ncbi_101775448	ACA5	28.14	29.39	25.62	33.6	36.63	35.29	42.44	30.67	29.15	42.29	42.4	34.87
ncbi_101775541	FZR2	10.3	8.43	11.31	13.5	16.8	16.07	12.42	12.77	13.37	17.37	16.11	17.04
ncbi_101775563	GATA15	0.1	0.31	0.28	0.64	1.04	0.42	0.65	1.22	0.63	0.89	0.4	1.41
ncbi_101775648	RPN6	20.22	17.44	23.55	30.88	34.94	28.29	44.84	39.85	34.93	44.37	47.01	40.71
ncbi_101775716	BZIP53	5.13	5.63	5.31	7.08	6.49	7.96	6.01	8.11	9	8.22	6.88	8.27
ncbi_101775801	--	0.9	0.88	1.09	1.23	1.63	1.07	1.72	1.28	1.48	1.64	1.96	1.29
ncbi_101775828	PERK1	54.44	64.04	67.92	41.52	35.18	47.41	26.88	31.61	23.67	3.45	9.73	7.04
ncbi_101775850	RGA5	12.11	12.94	12.24	6.06	13.88	12.5	10.67	12.97	11.68	11.05	7.51	9.2
ncbi_101775912	At5g45910	6.92	2.69	5.33	14.27	9.42	13.23	12.66	14.01	12.8	13.8	19.23	19.96
ncbi_101775963	LECRKS4	0.53	1.01	0.83	0.3	0.28	0.36	0.03	0.21	0.42	0.07	0.07	0
ncbi_101776029	--	10.9	8.11	9.22	11.45	11.9	11.21	14.86	12.42	12.52	16.52	17.62	15.48
ncbi_101776037	Os05g0140800	7.89	17.77	14.08	5.02	5.34	7.69	4.01	5.53	7.76	0.63	2.85	1.9
ncbi_101776050	MED26B	141.29	175.63	128.74	89.42	73.47	87.09	73.48	106.04	108.47	47.47	59.19	50.4
ncbi_101776058	--	1.14	0.66	0.85	2.51	3.08	1.65	1.72	1.47	1.43	3.52	2.47	2.71
ncbi_101776112	DIR17	5.7	4.34	5.55	6.68	9.25	6.77	13.12	10.24	9.19	15.87	12.63	11.44
ncbi_101776140	LECRK4	59.07	69.07	47.71	36.3	37.32	47.15	26.83	36.79	29.63	11.08	14.63	18.38
ncbi_101776141	BPM1	1.23	0.7	1.9	1.84	2.85	2.38	1.75	1.74	1.24	3.23	1.68	3.24
ncbi_101776163	nep1	1.54	1.86	1.95	1.09	1.07	1.06	0.67	0.83	1.31	0.26	1.06	0.76
ncbi_101776166	Os06g0520600	4.41	3.91	7.02	5.88	7.64	6.17	13.4	11.99	10.1	15.55	16.22	14.82
ncbi_101776211	MRP4	7.28	5.49	5.87	10.71	9.76	10.32	8.99	10.46	10.28	12.04	9.24	8.14
ncbi_101776257	MUB3	50.6	55.57	60.17	40.58	43.66	44.48	41.48	46.45	47.63	32.61	37.54	31.36
ncbi_101776295	IRX15-L	9.17	9.16	13.07	5.29	5.95	5.51	5.9	6.84	7.44	5.61	4.21	6.43
ncbi_101776342	PYL10	1.38	1.24	1.51	2.56	3.06	2.8	4.55	4.39	4.8	5.91	5.83	5.74
ncbi_101776373	SNL6	7.53	6.6	6.72	15.23	12.24	12.72	19.47	19.15	16.4	23.04	22.61	23.33
ncbi_101776396	KOB1	7.05	4.26	10	17.72	18.89	16.61	27.29	22.18	24.37	28.54	27.17	29.31
ncbi_101776462	CRPK1	14.56	9.61	12.77	21.45	22.9	26.17	31.42	23.27	19	35.65	32.2	28.92
ncbi_101776499	CDF2	28.04	18.89	24.05	40.71	38.58	34.75	49.84	37.2	36.4	39.32	36.22	59.83
ncbi_101776590	Rv0183	25.04	21.52	26.17	36.01	40.91	37.1	45.45	49.85	50.49	62.19	57.9	62.74
ncbi_101776652	UCH3	3.94	4.11	4.44	7.17	7.24	8.21	13.75	10.67	9.6	14.39	11.39	11.94
ncbi_101776693	Os04g0650000	25.76	83.82	153.27	253.55	437.8	429.59	510.48	133.35	102.07	445.55	513.23	302.59
ncbi_101776748	At1g77220	3.68	3.11	3.66	3.54	5.78	4.62	9.11	7.16	7.27	9.89	10.27	9.28
ncbi_101776804	--	1.27	1.07	1.44	1.68	2.52	2.06	3.33	3.03	3.02	4.85	3.35	3.49
ncbi_101776878	SPBC29A10.10c	1.33	1.53	2.01	1.92	2.98	2.05	2.43	2.41	2.49	3.17	2.91	2.85
ncbi_101776919	--	51.71	50.32	43.77	25.54	30.07	31.71	40.52	42.55	43.28	23.11	35.75	25.61
ncbi_101776926	OsI_07012	1035.79	1293.33	783.52	925.09	620.6	980.53	338.4	493.13	483.23	173.29	296.79	260.51
ncbi_101777008	RTNLB8	0.56	0.61	0.75	0.66	0.94	1.55	1.06	0.99	1.57	1.06	1.29	1.23
ncbi_101777015	IP5P11	12.81	8.88	15.33	51.72	33.9	35.06	64.23	27.31	20.91	57.12	52.96	40.17
ncbi_101777018	GCL2	13.1	15.63	18.99	8.24	9.76	7.23	2.33	5.02	5.1	2.52	4.4	2.51
ncbi_101777027	At1g26690	1.44	0.46	0.85	1.14	1.63	1.17	1.45	1.96	1.31	1.89	1.57	2.35
ncbi_101777091	ACK2	81.36	70.55	89.64	87.98	100.98	105.11	104.92	107.05	99.09	117.52	103.17	139.68
ncbi_101777096	ACR6	3.8	2.17	3.22	14.59	16.93	12.33	16.29	9.55	11.61	28.47	16.59	22.35
ncbi_101777108	--	1.31	3.78	2.47	1.13	2.12	1.81	0.2	1.93	2.2	0.18	0.11	0.36
ncbi_101777125	--	111.68	110.02	102.26	85.54	62.08	67.1	101.77	81.91	80.06	49.69	72.01	75.48
ncbi_101777161	XTH3	2.47	1.92	2.6	1.54	1.6	1.63	1.8	1.56	1.99	1.6	1.25	1.38
ncbi_101777360	RHF2A	215.96	246.59	178.46	108.84	88.97	130.08	72.15	137.59	150.4	18.94	64.89	38.38
ncbi_101777426	FBL22	3.35	2.09	2.12	2.43	4.21	2.91	2.98	4.21	2.37	3.8	3.7	3.69
ncbi_101777433	PUB1	18.51	17.11	17.36	21.04	21.95	20.73	23.84	23.19	22.88	24.29	24.23	22.42
ncbi_101777454	--	1.17	0.61	1.79	1.24	2.07	1.51	2.6	1.22	1.96	1.63	1.79	3.65
ncbi_101777523	--	1.75	1.54	2.38	2.79	3.82	2.76	4.3	4.12	2.97	5.27	3.18	3.7
ncbi_101777524	AIRP2	12.33	8.12	11.08	18.21	17.98	17.53	28.07	18.49	17.95	34.21	31.18	28.74
ncbi_101777525	GH3.8	6.46	9.9	7.32	4.19	4.97	4.49	4.33	3.9	4.84	1.91	3.02	2.63
ncbi_101777674	Os05g0587100	14.03	10.53	16.69	13.75	19.49	16.45	14.86	19.25	20.32	18.63	17.92	17.96
ncbi_101777704	MYBS3	274.81	341.58	288.4	215.31	211.1	244.49	266.63	234.94	223.25	197.62	242.46	256.51
ncbi_101777710	PBL17	125.24	169.01	168.19	66.87	84.91	119.39	39.74	69.37	81.39	13.12	23.74	17.65
ncbi_101777716	FAR1	2.22	2.38	3.29	3.77	5.33	4.89	3.39	3.81	4.05	5.08	5.68	4.87
ncbi_101777831	ARI1	11.75	8.18	12.65	9.18	5.72	8.59	7.4	9.17	10.03	3.8	8.57	4.86
ncbi_101777965	--	4.49	3.1	2.13	6.48	6.26	6.61	8.05	5.03	4.79	6.79	6.87	8.2
ncbi_101778047	--	0.98	1.29	1.68	1.68	2.1	1.89	1.57	1.99	1.74	1.9	2.13	1.67
ncbi_101778144	HY5	8.23	6.57	7.56	15.02	11.8	9.9	19.27	8.92	6.94	18.43	14.34	12.52
ncbi_101778165	CPL1	13.55	14.1	12.31	8.61	10.51	12.09	11.45	11.28	10.76	10.79	12.28	8.94
ncbi_101778169	PPCK2	3.39	0.95	0.64	4.26	6.02	3.55	12.98	5.3	3.29	12.4	6.73	12.08
ncbi_101778226	--	202.17	275.9	202.94	108.92	97.29	178.62	125.83	95.66	99.92	53.1	77.26	72.29
ncbi_101778249	HIPP30	0.06	0	0	0.2	0.66	0.91	0.07	0.75	0.8	0.44	1.23	0.68
ncbi_101778263	NAC022	46.99	102.89	34.5	24.13	33.01	46.66	25.04	38.72	32.33	10.91	19.5	28.95
ncbi_101778265	F3H-2	276.1	312.95	241.49	285.63	216.92	222.53	145.99	136.46	95.9	22.54	72.42	31.99
ncbi_101778280	PPME1	9.97	9.37	10.7	12.73	12.16	10.47	14.7	13.33	12.69	14.38	13.82	14.19
ncbi_101778315	--	0.35	0.34	0.46	0.44	1.18	0.37	1.91	1.41	1.43	2.51	2.02	2.4
ncbi_101778525	IST1	5.16	2.36	3	8.31	6.95	4.61	15.88	4.77	3.07	11.68	11.92	10.15
ncbi_101778751	Os04g0663200	7.74	6.28	7.05	8.53	10.08	10.91	14.92	14.3	16.01	19.93	19.87	20.94
ncbi_101778786	COQ3	4.87	4.22	5.11	7.29	8.29	6.94	6.41	6.6	6.67	9.18	9.29	7.64
ncbi_101778794	--	0.58	0.54	0.91	1.51	1.59	1.23	1.27	0.91	1.31	0.9	2.13	3.02
ncbi_101778911	--	0.16	0.41	0.63	1.02	1.34	1.45	1.58	1.27	0.5	1.93	0.98	0.6
ncbi_101778948	DNAJB4	13.82	8.33	9.51	20.32	15.26	17.59	22.82	18.65	14.87	26.39	23.42	16.22
ncbi_101778974	--	89.19	119.7	65.63	48.65	39.59	57.41	27.26	32.9	29.92	12.84	16.97	17.18
ncbi_101778991	TBC1D5	59.46	57.04	55.95	75.29	68.54	55.67	67.98	66.17	61.33	70.46	65.09	57.17
ncbi_101779036	--	2.93	3.27	2.81	2.71	2.2	1.95	1.42	1.8	2.5	1.2	1.26	0.98
ncbi_101779101	--	263.59	249.92	182.83	103.77	165.36	142.1	44.64	83.39	74.53	11.66	59.44	11.26
ncbi_101779139	CDKG-2	75.1	75.67	79.68	61.75	60.39	68.93	58.99	58.94	55.69	61.85	61.98	54.73
ncbi_101779279	Os07g0633500	3.65	2.12	3.58	4.38	4.66	3.74	5.91	6.6	5.47	6.39	6.27	7.42
ncbi_101779481	PER41	0.29	0.92	1.04	0.09	0.14	0.3	0	0.5	0.58	0	0.21	0.06
ncbi_101779586	--	64.35	80.11	59.71	53.91	37.67	38.9	14.87	27.47	34.22	2.06	7.62	6.7
ncbi_101779662	GRF10	10.2	6.69	11.12	10.62	13.62	11.09	15.31	11.59	10.55	16.01	13.46	17.94
ncbi_101779759	--	5.76	3.56	2.43	2.77	1.29	2.4	2.98	2.78	2.18	1.31	0.7	1.28
ncbi_101779849	--	0.47	1.15	0.99	1.56	1.71	1.42	1.43	1.37	2.25	2.63	1.49	1.91
ncbi_101779925	--	0.8	0.36	0.63	1.71	1.58	0.9	1.24	1.29	1.21	1.72	1.22	1.45
ncbi_101780117	GN	2.77	2.09	2.89	4.92	5.6	4.95	4.65	4.51	4.39	5.22	5.12	5.7
ncbi_101780138	ERD7	927.04	1080.45	1057.75	734.13	579.17	690.92	199.88	272.33	335.52	61.78	156.82	95.3
ncbi_101780139	NDL2	64.44	71.12	54.97	54.44	47.06	51.64	18.8	26.92	33.08	8.96	12.34	10.42
ncbi_101780208	ARID2	1.02	0.99	1.32	1.51	1.93	1.6	2.36	2.08	1.63	2.44	3.1	2.65
ncbi_101780261	ACA6	8.2	7.79	6.16	9.16	12.07	11.23	13.8	10.84	12.21	13.83	14.99	11.93
ncbi_101780376	At5g19025	2.45	2.07	2.65	3.62	4.14	3.82	6.53	5.29	4.98	6.95	6.7	7.19
ncbi_101780382	--	4.68	4.44	6.22	5.56	8.1	6.99	5.93	5.92	6.75	8.7	7.91	7.82
ncbi_101780436	At2g27500	2.99	9.65	4.1	1.1	1.5	1.05	0.42	0.98	2.96	0.16	0.2	0.28
ncbi_101780455	UEL-1	219.82	350.36	298.15	131.99	171.57	173.69	93.3	157.26	201.7	25.39	43.11	42.22
ncbi_101780672	At5g39865	0.67	0.54	0.21	0.93	1.43	1.24	1.23	1.21	1.25	1.6	1.57	2.33
ncbi_101780726	CUL3A	8.13	6.14	7.7	11.37	13.61	10.5	11.13	10.76	10.21	12.78	11.58	13.02
ncbi_101780753	PUB1	24.61	39.16	31.2	16.78	20.09	26.99	17.92	19.37	20.49	15.23	22.4	26.44
ncbi_101780776	At1g51890	122.95	116.87	56.89	78.05	41.79	50.3	20.46	48.94	44.4	9.33	12.16	9.53
ncbi_101780802	--	15.5	14.71	13.4	14.62	10.32	10.88	5.47	8.7	9.34	4.4	4.12	5.43
ncbi_101780805	ESS2	6.14	3.6	5.7	6.49	6.79	5.61	8.76	6.33	5.02	8.44	6.55	9.23
ncbi_101780873	--	2.24	1.07	1.71	4.35	4.14	3.61	3.87	3.25	2.85	4.77	3.22	3.78
ncbi_101780931	CHY1	24.06	22.56	31.96	33.69	28.86	33.04	43.63	31.48	29.08	43.29	37.79	35.23
ncbi_101780960	surE	3.42	3.17	3.61	6.33	5.2	5.13	5.47	4.28	4.61	6.23	6.47	4.38
ncbi_101781040	Os05g0169000	290.03	279.95	252.25	193.4	146.8	169.01	142.39	173.61	164.44	69.52	124.59	95.11
ncbi_101781042	GH3.5	23.98	19.02	24.04	35.27	40.1	37.31	45.1	31.13	32.56	44.41	37.98	47.05
ncbi_101781130	DAGLB	17.29	21.58	20.09	15.37	15.78	14.68	14.23	14.9	16.14	10.61	12.52	12.56
ncbi_101781550	ZAT10	3.85	2.35	3.84	4.92	6.32	7.22	5.5	4.72	4.47	5.08	9.98	8.14
ncbi_101781628	SCO5321	4.62	5.58	6.25	5.55	7.33	5.94	6.77	5.1	6.63	7.13	6.05	6.41
ncbi_101781737	TSO2	2.81	2.63	4.7	6	7.42	6.12	8.09	10.97	12.34	12.95	15.35	15.13
ncbi_101781768	At2g26730	1.84	3.56	1.83	0.65	1.9	1.95	0.79	1.32	1.25	0.14	0.45	0.41
ncbi_101781874	SKIP30	3.39	2.81	3.02	4.72	4.82	4.33	5.63	5.02	2.87	7.76	5.95	5.88
ncbi_101781881	At1g75040	0.33	1.18	0.59	0.12	0.2	0.5	0.05	0.29	0.04	0.34	0.09	0.1
ncbi_101781948	HP30-2	12.54	11.65	18.58	24.94	26.15	19.76	28.32	27.33	20.27	30.1	31.95	31.99
ncbi_101782006	TOC132	4.02	2.01	2.84	4.54	4.7	4.82	4.99	4.61	3.77	4.88	4.57	4.17
ncbi_101782053	--	2.98	2.45	4.68	3.65	5.53	5.17	10.01	7.67	7.57	9.89	9.81	9.77
ncbi_101782187	At5g39450	2.19	0.8	2.51	2.9	4.06	3.66	7.16	7.28	3.9	9.55	7.95	9.27
ncbi_101782316	--	6.8	5.19	9.14	7.79	10.1	9.38	9.75	8.54	8.36	10.1	12.47	11.28
ncbi_101782411	MYOB5	0.56	1.25	1.46	0.63	0.53	0.61	0.09	0.53	0.37	0.29	0.37	0.71
ncbi_101782485	--	62.96	75.48	76.86	45.27	39.31	62.6	50.95	48.22	46.18	18.96	31.07	23.28
ncbi_101782575	At2g19130	6.25	7.33	4.53	3.6	5.12	6.34	4.37	4.3	5.51	3.5	3.94	3.03
ncbi_101782685	--	0.85	0.79	0.5	1.8	1.45	1.23	2.15	1.53	1.39	1.96	2.48	0.9
ncbi_101782714	At3g47110	19.49	67.02	55.04	5.32	12.01	22.12	10.25	21.18	24.69	5.07	14.85	9.57
ncbi_101782760	Os04g0449400	116.6	135.74	132.82	81.02	109.93	81.74	20.96	44.97	60.6	9.72	13.22	21.51
ncbi_101782863	RPN7	20.24	13.69	17.51	28.17	28.04	26.66	30.55	29.03	26.3	37.27	35.68	32.22
ncbi_101782894	PTI13	83.98	108.19	68.08	34.88	35.58	47.54	50.72	58.97	65.92	31.02	45.16	37.87
ncbi_101783012	CAF1-6	8.07	4.59	6.81	8.6	9.17	9.29	10.07	10.34	9.29	8.53	9.31	9.82
ncbi_101783074	--	72.21	103.89	81.58	50.28	52.66	58.54	31.88	49.12	59.65	10.98	17.07	13.69
ncbi_101783096	Os03g0645100	1.09	1.43	2.08	0.17	0.3	0.35	0.09	0.14	0.15	0.21	0.04	0.12
ncbi_101783108	KIN13B	5.69	6.07	6.03	7.66	9.26	7.92	6.7	7.05	6.8	9.34	9.8	8.87
ncbi_101783125	NAC074	302.97	323.37	248.24	219.15	146.38	171.6	78.8	139.09	142.52	36.65	56.45	46.74
ncbi_101783171	PER17	70.49	85.64	100.21	46.32	55.54	46.49	16.86	48.52	76.7	10.87	16.14	22.04
ncbi_101783346	--	2.66	1.7	2.62	3.24	3.49	2.83	5.7	4.03	3.54	7.04	5.47	6.38
ncbi_101783350	SWI2	2.02	3	2.37	3.34	3.72	4.06	3.82	3.11	2.54	3.85	3.85	3.28
ncbi_101783358	ARF16	45.14	37.67	47.98	13.41	8.33	17.04	8.46	17.25	17.35	9.28	10	7.67
ncbi_101783368	--	5.87	5.76	6.65	7.72	9.72	8.87	9.26	10.08	8.25	9.82	5.56	11.47
ncbi_101783395	CRK6	2.65	3.83	2.7	1.13	1.21	1.09	2.05	2.2	1.7	0.28	1.15	0.29
ncbi_101783437	SKP20	24.15	17.52	17.68	39.85	21.33	24.41	33.25	32.01	24.3	33.58	33.61	31.58
ncbi_101783447	RF2b	12.06	13.65	15.65	5.41	4.57	8.04	5.54	8.63	9.15	1.84	1.97	1.87
ncbi_101783467	GST4	214.76	246.8	187.38	160.39	177.75	203.76	125.93	141.46	127.8	63.35	81.63	97.98
ncbi_101783486	At5g37930	7.75	7.67	8.26	9.26	10.08	12	13.39	9.56	13.02	13.3	12.12	13.55
ncbi_101783622	CSLD2	203.87	366.43	298.97	115.65	141.82	259.5	114.49	201.1	206.68	38.39	77.1	57.65
ncbi_101783663	ALIS3	268.45	303.48	189.63	227.5	181.4	216.09	101.73	126.42	114.18	33.72	50.62	40.41
ncbi_101783702	SPT16	13.92	13.37	15.96	22.47	21.68	18.94	19.47	19.16	19.52	26.68	25.26	22.52
ncbi_101784025	--	5.76	10.06	9.25	5.28	7.2	6.68	3.96	9.28	4.63	3.83	5.66	5.27
ncbi_101784098	--	5.09	4.34	3.3	4.52	6.21	5.87	4.12	5.19	4.21	6.45	4.49	5.44
ncbi_101784175	SUS4	133.33	126.65	149.74	77.28	55.7	56.2	38.66	67.67	70.04	61.42	52.76	43.83
ncbi_101784183	CRK20	123.03	136.62	107.34	94.39	95.59	104.27	42.43	58.62	67.66	14.01	24.03	24.02
ncbi_101784216	PBS1	121.22	121.45	111.04	96.17	88.52	97.19	43.3	50.88	57.08	23.59	34.8	30.05
ncbi_101784225	--	11.44	11.66	12.12	19.83	25.95	24.2	32.18	25.2	21.26	33.18	30.95	32.9
ncbi_101784254	wdr44	42.48	51.16	42.32	25.8	31.37	32.12	34.89	27.01	29.64	19.74	18.45	21.4
ncbi_101784317	--	27.78	24.6	22.98	27.05	16.17	20.73	7.99	14.08	12.9	2.85	5.98	6.39
ncbi_101784342	BBX22	101.61	85.24	102.9	51.88	64.83	74.13	49.76	54.95	82.39	43.02	53.86	73.94
ncbi_101784480	SRF2	0.28	0.46	0.84	1.21	1.15	0.87	1.83	1.32	0.47	1.78	1.58	1.17
ncbi_101784501	--	0.08	0.61	0.5	0.29	1.26	0.58	0.93	0.91	0.65	0.85	1.02	1.41
ncbi_101784537	At2g45070	5.73	5.39	7.45	7.76	12.24	9.93	17.98	15.4	16.81	18.87	15.82	20.56
ncbi_101784605	FLN1	15.17	14.34	11.26	8.81	8.63	10.24	4.97	8.5	7.46	2.97	4.19	4.23
ncbi_101784621	RR23	2.6	2.23	3.8	3.89	5.49	5.02	6.28	6.44	6.2	7.06	6.63	6.98
ncbi_101784740	BZR2	121.89	147.74	121.39	88.29	83.99	111.24	91.66	101.45	95.45	53.02	87.33	82.95
ncbi_101784785	dfr1	1115.19	1402.24	915.36	1181.88	572.15	642.88	442.88	698.8	691.94	210.91	249.09	296.74
ncbi_101784812	PERK1	144.69	143.46	107.24	129.81	86.5	94.87	41.97	64.38	72.97	15.35	31.13	19.96
ncbi_101784883	NSE4A	4.92	3.89	4.92	8.24	10.45	8.51	10.14	7.29	7.68	11.07	8.34	10.6
ncbi_101784904	RIN4	317.37	376.19	297.3	196.74	167.04	238.41	89.56	119.43	111.37	11.77	24.06	20.78
ncbi_101784917	dnajc2	15.04	11.68	15.22	20.75	20.11	21.85	17.39	19.66	19.23	23.11	23.46	20.21
ncbi_101784918	At3g19330	9.32	11.91	14.36	8.14	5.28	7.04	2.46	3.88	5.47	1.22	2.05	1.64
ncbi_101784921	FES1	3.19	2.59	3.19	8.81	9.08	8.15	8.93	8.06	7.2	8.28	9.75	9.1
ncbi_101785014	CYP87A3	4.59	12.34	12.93	2.59	2.76	3.54	0.07	1.15	1.22	0.03	0.19	0.18
ncbi_101785071	OSK1	63.38	62.95	66.55	57.59	59.26	56.1	51.18	54.68	58.25	49.29	49.95	54.07
ncbi_101785186	H1-I	77.98	61.15	65.27	139.25	144.44	156.76	195.05	81.25	72.64	231.12	242.23	239.57
ncbi_101785318	CAMTA3	23.77	22.15	26.62	33.31	38.59	36.32	47.23	35.74	36.18	46.61	43.73	43.5
ncbi_101785341	ATL55	2.57	1.34	1.92	2.31	2.76	2.2	4.1	3.57	2.83	4.41	3.83	4.26
ncbi_101785346	EXO70B1	69.71	95.22	89.5	58.3	52.58	59.2	60.02	72.76	67.74	31.04	48.56	38.46
ncbi_101785420	XYXT1	1.52	1.07	0.83	0.9	0.36	0.46	0.89	0.55	0.42	0.08	0.51	0.54
ncbi_101785507	--	42.96	39.66	36.45	22.33	14.75	18.44	18.8	29.37	29.16	8.8	13.44	22.05
ncbi_101785672	GW2	4.85	3.32	4.94	4.89	8.01	7.03	10.71	8.93	7.88	10.27	10.43	11.74
ncbi_101785756	NDT1	20.39	18.7	20.61	22.57	24.88	22.93	22.28	21.78	21.12	25.69	23.08	25.69
ncbi_101785812	URIII	19.68	14.5	18.18	34.14	25.93	27.66	29.08	24.13	30.73	31.72	30.58	38.59
ncbi_101785828	TPR2	51.69	45.31	37.76	86.85	66.29	71.03	80.17	81.03	93.22	89.69	76.18	79.29
ncbi_101785895	--	79.6	65.71	84.69	85.87	90.81	70.81	90.05	79.06	69.61	95.52	90.57	87.42
ncbi_101785920	TTA	69.14	70.69	58.75	50.04	48.08	50.99	32.06	41.45	37.4	18.26	21.01	21.97
ncbi_101786051	SRF3	51.28	71.87	58.86	48.91	47.83	45.93	12.53	19.37	23.23	7.24	5.55	5.87
ncbi_101786067	At1g51745	2.94	2.89	3.81	4.05	5.37	3.83	7.46	7.87	7.67	9.63	9.95	10.2
ncbi_101786086	--	4.78	3.8	7.43	8.26	11.31	9.53	8.63	8.93	8.94	11.97	10.93	11.16
ncbi_101786117	--	4.92	2.62	4.18	5.95	9.54	8.1	6.6	4.49	2.5	10.54	8.87	8.23
ncbi_101786169	--	7.72	4.31	6.13	7.91	11.37	8.95	11.91	9.85	8.13	12.27	11.13	12.46
ncbi_101786258	ROC6	37.82	34.69	24.69	23.97	18.57	23.02	9.17	10.39	13.28	7.52	9.91	7.27
ncbi_101786363	CXE16	26.67	30.17	23.62	20.13	18.91	25.27	12.58	13.85	14.13	8.3	10.04	10.33
ncbi_101786480	PAE5	71.39	90.95	60.5	39.62	49.81	49.03	37.35	51.52	47.8	8.16	17.43	12.81
ncbi_101786544	ARF12	14.09	13.44	14.11	7.55	8.27	8.2	3.84	6.18	6.68	3.11	3.05	3.44
ncbi_101786548	Os05g0571100	27.96	26.34	32.98	17.2	17.16	14.17	13.27	23.14	22.53	12.18	16.9	14.78
ncbi_101786665	--	1.65	2.09	2.24	3.03	3.19	4.12	3.11	3.14	3.1	3.84	4.21	2.37
ncbi_101786696	BC1L4	1.36	1.65	1.48	0.59	1.31	0.74	0.68	0.56	1.12	0.18	0.52	0.14
ncbi_101786702	--	24.58	14.13	18.76	34.43	28.84	26.98	36.7	29.06	21.86	26.56	32.43	33.58
ncbi_101786793	FLXL3	3.7	4.08	4.35	4.89	5.1	3.91	4.34	5.43	4.06	4.95	4.09	5.09
ncbi_101786814	CCDC25	94.33	93.65	83.78	69.69	76.5	74.7	57.56	65.52	65.02	61.1	54.35	50.22
ncbi_101786815	CAX1b	1.66	0.9	2	2.24	2.66	2.29	2.09	2.85	3.01	3.13	3.46	2.64
ncbi_101786820	--	27.54	34.62	33.68	24.12	25.7	24.78	24.06	27.85	25.36	24.28	23.68	22.21
ncbi_101786834	PALD1	30.12	18.41	25.01	32.27	34.57	30.31	65.59	41.34	24.68	69.13	49.39	49.44
ncbi_101786891	ALA8	32.01	48.56	35.82	25.43	35.32	31.6	9.86	21.76	22.3	6.91	7.33	6.35
ncbi_101786895	--	2.17	1.12	2.45	3.62	3.15	2.17	2.82	2.41	2.6	3.42	3.26	3.26
ncbi_105913578	NRP1	130.55	149.91	151.5	93.9	79.27	88.62	41.45	44.05	68.41	47.47	54.53	35.2
ncbi_105913666	SD25	3.62	3.74	4.91	6.64	8.52	5.92	13.76	10.2	10.28	17.2	17.96	14.09
ncbi_105913919	Os03g0733400	8.85	8	12.8	10.22	15.37	15.66	14.04	13.08	11.17	15.54	16.07	15.46
ncbi_105914318	At5g14430	1.29	0.61	1.55	0.49	0.71	0.47	0.33	0.85	0.55	0.17	0.1	0.14
ncbi_105914496	Os03g0733400	5.93	4.88	5.77	7.26	8.52	7.43	9.42	8.92	8.8	11.99	10.65	10.73
ncbi_105914851	RPM1	70.44	97.24	71.46	42.78	49.83	53.77	46.58	64.19	65.24	34.29	34.92	36.85
ncbi_105915176	OXP1	2.74	2.58	3.59	7.15	7.29	6.31	5.38	5.43	5.59	8.03	8.32	6.35
ncbi_111256414	--	4.92	4.64	5.23	3.11	3.2	4.07	3.41	4.56	3.29	2.72	4.48	2.21
ncbi_111256430	PER70	0.21	0.27	0.42	0	0.2	0.04	0	0.29	0.04	0	0.04	0.04
ncbi_111256471	--	0	1.11	0.3	0.34	0.26	0.09	0.12	0.09	0.19	0.21	0.09	0.1
ncbi_19526752	matK	3.26	2.33	2.29	1.84	1.42	1.35	2.61	1.33	1.37	1.36	1.97	1.3
ncbi_19526827	rps3	0.53	3.21	0.06	0.36	0.66	0.23	0.2	0.08	0.24	0.4	0.48	0

## Sheet: MM14
Table S6 Differentially expressed genes within modules 14
Gene id	Symbol	LD-1	LD-2	LD-3	LDCK-1	LDCK-2	LDCK-3	HD-1	HD-2	HD-3	HDCK-1	HDCK-2	HDCK-3
ncbi_101752608	LSU1	11.03	16.97	6.56	11.99	14.89	9.83	4.02	4.89	2.51	48.34	12.24	10.47
ncbi_101752726	UBC27	23.97	26.08	30.74	19.38	22.62	23.32	34.3	28.82	31.7	20.32	20.77	26.06
ncbi_101752752	SPBC2A9.03	28.83	14.73	14.26	38.82	12.87	14.2	17.68	16.84	17.66	27.24	37.39	21.54
ncbi_101752872	fmdA	5.97	8.24	8.88	6.68	8.36	8.4	8.06	8.11	11.67	3.46	3.6	3.15
ncbi_101753085	BX7	3.55	4.55	5.59	2.71	4.52	2	4.18	4.37	4.65	1.02	1.34	2.42
ncbi_101753190	--	22.04	37.75	34.59	12.25	25.03	22.43	15.7	28.51	26.39	2.17	5.73	6.84
ncbi_101753325	HIPP23	2.46	6.44	8.44	3.88	6.38	6.01	1.84	6.77	10.83	0.58	1.03	1.08
ncbi_101753374	AT8	8.1	10.6	19.9	13.22	17.79	13.87	19.14	17.75	18.02	2.83	3.72	3.31
ncbi_101753385	SRF6	0.45	1.18	0.8	0.49	0.99	0.45	0.67	0.69	1.28	0.44	0.46	0.29
ncbi_101753418	--	0.26	0.34	1.96	1	0.8	1.44	0.07	0.11	0.12	1.05	2.16	0.58
ncbi_101753556	DREB1E	6.08	8.22	7.22	4.08	3.7	9.86	2.89	11.55	8.25	1.83	1.42	0.9
ncbi_101753620	CML18	80.88	98.21	107.17	53.66	68.67	78.82	81.71	84.28	73.21	42.6	72.83	68.24
ncbi_101753784	BHLH148	202	271.46	316.96	166.8	174.18	328.66	399.87	442.56	368.64	93.73	176.52	167.67
ncbi_101753857	MYB1	2.2	1.44	1.41	12.97	7.12	7.52	2.23	1.51	1.95	13.49	8.69	10.5
ncbi_101753885	--	0.43	0.46	0.65	0.08	0.25	0.26	0.56	0.44	0.8	0.07	0.12	0.27
ncbi_101753935	FLZ1	1.52	0.12	0.95	3.13	2.8	1.18	1.23	1.43	0.81	1.95	3.47	3.62
ncbi_101754013	At1g16860	2.13	2.26	5.7	2.71	5.6	5.07	3.44	4.73	5.35	2.74	2.31	2.69
ncbi_101754025	Dagla	12.26	14.4	15.2	15.92	14.38	13.57	12.41	11.57	11.58	16.04	17.51	12.65
ncbi_101754450	LRK10L-1.5	1.85	1.14	1.92	0.98	1.72	2.13	1.44	2.23	1.54	0.59	1.08	1.5
ncbi_101754580	NPF8.3	1.35	2.5	4.69	1.54	1.2	1.3	1.98	3.6	3.65	1.17	0.64	1.47
ncbi_101754659	GALT3	3.48	5.24	7.71	2.02	2.14	2.2	9.22	6.69	6.96	0.38	1.16	1.65
ncbi_101755081	--	26.47	13.75	22.6	32.81	33.89	34.88	34.22	21.47	18.19	39.4	38.78	33.04
ncbi_101755105	At5g19025	8.08	8.8	8.35	4.56	6.6	4.97	8.9	8.05	5.97	5.46	5.43	4.32
ncbi_101755128	DRP1E	8.61	8.52	8.26	12.23	12.97	12.79	5.34	6.56	7.36	14.67	13.03	11.84
ncbi_101755166	Os01g0926700	14.39	30.4	43.17	13.39	14.41	16.46	16.1	23.32	38.57	2.85	2.85	2.93
ncbi_101755181	ATL46	3.76	5.01	4.54	4.17	3.92	4.2	3.18	5.17	5.2	1.55	2.08	1.97
ncbi_101755192	XA21	9.86	9.8	5.74	2.39	7.25	2.05	7.9	9.41	7.16	2.02	1.48	3.21
ncbi_101755211	--	1.01	0.48	2.18	2.03	1.43	1.88	1.14	0.59	0.66	2.11	2.94	1.66
ncbi_101755279	ERF3	18.01	11.44	17.59	13.51	12.28	10.04	18.98	18.88	14.55	7.86	8.67	9.33
ncbi_101755350	DDB_G0274487	11.1	8.02	6.71	11.62	9.91	9.37	11.39	8.29	9.25	14.38	13.06	16.52
ncbi_101755451	NRS/ER	47.24	73.21	63.84	44.13	57.27	48.86	31.75	52.46	51.9	21.11	27.49	32.93
ncbi_101755681	--	80.25	107.85	123.63	59.97	43.51	83.8	68.43	103.42	101.82	19.93	30.29	29.49
ncbi_101755823	At2g27500	39.62	52.75	56.16	28.62	33.58	31.65	34.29	55.33	62.17	16.22	19.69	23.67
ncbi_101755877	PP7	25.58	22.51	26.53	36.6	35.54	34.87	27.18	28.14	25.6	37.8	36.88	36.99
ncbi_101755947	--	9.9	4.07	3.33	9.93	4.37	4.43	9.11	5.16	4.67	8.79	8.1	5.46
ncbi_101756021	ACS1	9.83	16.05	26.59	8.52	7.87	6.6	14.68	16.41	21.11	6.06	7.09	6.74
ncbi_101756326	MDIS2	24.85	44.46	44.43	22.35	31.22	34.93	22.63	40.57	42.02	11.77	15.24	15.49
ncbi_101756391	BC10	0.36	0.39	0.91	0.53	0.77	0.78	0.65	0.88	0.9	0.18	0.07	0.07
ncbi_101756625	ARA1	1.31	1.55	1.14	0.75	1.09	0.86	1.07	0.97	1.58	0.33	0.72	0.33
ncbi_101756664	--	6.66	6.41	10.9	8.55	10.15	11.19	8.98	10.34	11.64	7.79	7.42	7.08
ncbi_101756875	--	121.92	135.36	102.17	123.55	111.54	130.54	73.82	68.12	82.4	264.33	213.41	236.01
ncbi_101756912	RTNLB8	0.31	0.27	0.14	0	0.05	0	0.42	0.16	0.17	0	0.11	0.06
ncbi_101756923	PK1	0.77	1.02	1.17	3.92	3.45	3.41	1.74	1.82	1.41	4.9	2.94	3.4
ncbi_101757192	PER24	18.68	32.85	38.44	26.48	26.53	24.47	10.5	20.45	30.74	2.07	3.09	5.28
ncbi_101757313	GA2OX5	0.2	0.2	0.06	0.06	0.15	0.01	0.05	0.01	0.06	1.26	0.08	0.51
ncbi_101757452	Os01g0257400	37.28	43.34	46.37	36.19	37.52	36.7	38.29	39.61	39.31	31.76	30.15	33.99
ncbi_101757508	--	34.95	101	56.74	18.66	38.7	54.49	30.49	55.12	60.59	4.08	18.67	11.66
ncbi_101757687	--	1.44	2.14	2.45	1.47	1.14	1.97	1.64	1.14	3.42	0.48	0.08	0.88
ncbi_101758039	--	0.24	0.71	0.92	0.05	0.25	0.31	0.41	0.37	1.05	0.18	0	0
ncbi_101758088	NAD-ME2	60.07	53.47	57.67	48.02	55.7	53.57	59.25	61.07	64.82	48.11	40.58	39.32
ncbi_101758092	CCT2	320.76	276.97	295.74	203.95	183.25	192.05	405.65	310.45	366.39	186.87	197.76	229.32
ncbi_101758343	CLPC2	269.38	263.18	259.25	291.59	355.2	335.4	205.47	205.45	239.75	417.32	363.08	351.59
ncbi_101758590	--	0.78	1.06	1.75	1.02	1.2	0.91	0.64	1.1	1.71	0.58	0.4	0.63
ncbi_101758783	At4g18380	0.42	0.15	0.1	0.61	0.7	0.55	0.32	0.28	0.55	1.45	0.48	0.99
ncbi_101759181	HSR201	28.58	35.2	32.73	3.55	8.73	2.54	17.98	31.8	32.5	3.68	5.43	3.58
ncbi_101759261	BRH1	1.13	0.81	0.31	1.99	1.52	1.12	1.21	1.03	0.45	1.76	1.86	3.08
ncbi_101759326	--	13.55	13.86	16.47	12.07	13.65	12	11.56	15.12	16.2	10.7	12.25	15.98
ncbi_101759470	--	17.27	23.48	39.33	22.48	25.84	23.75	30.03	30.96	23.28	7.18	21.17	12.43
ncbi_101759725	-	8.08	7.51	7.77	5.89	7.33	8.07	8.12	7.94	7.82	5.61	6.4	6.54
ncbi_101759799	RPL10A	41.98	45.89	48.84	37.21	43.62	42.74	42.94	46.67	44.55	42.39	40.69	39.85
ncbi_101759869	RIPK	66.74	89.81	99.47	59.11	56.33	94.35	97.55	89.43	109.41	13.92	20.72	30.18
ncbi_101760139	LYSMD1	31.44	35.33	37.71	33.13	32.77	36.42	31.06	36.14	40.14	21.27	24.23	27.04
ncbi_101760140	--	8.12	11.26	14.43	3.18	5.65	6.08	10.19	9.93	10.45	4.67	7.42	5.5
ncbi_101760349	PSL5	15.4	19.54	21.18	12.45	15.12	13.79	12.69	17.85	21.1	16.06	12	15.21
ncbi_101760372	SPAC56F8.03	23.05	22.18	26.42	29.96	29.07	27.91	23.81	26.94	29.33	35.76	32.86	25.01
ncbi_101760439	WRKY51	26.48	42.7	53.01	21.02	38.14	53.38	61.69	61.49	56.09	9.26	32.37	20.15
ncbi_101760443	--	14.34	16.86	16.55	10.42	15.66	22.05	22.48	21.92	17.25	7.96	13.46	14.69
ncbi_101760449	At1g56140	46.12	55.16	55.69	31.94	35.48	40.59	78.27	70.68	74.72	25.64	14.64	26.93
ncbi_101760473	--	0.33	0.3	0.41	1.04	0.93	0.81	0.84	0.29	0.13	0.72	1.28	1.18
ncbi_101760691	LRR1	351.21	378.72	338.89	291.83	341.98	298.75	467.75	449.33	370.44	258.51	301.55	310.1
ncbi_101760883	--	1.7	1.19	0.8	0.53	0.53	0.64	2.12	1.97	1.02	0.14	0.29	0.46
ncbi_101760962	tmem53	112.27	156.39	150.36	143.4	132.09	127.27	176.88	198.26	173.94	90.04	103.4	104.94
ncbi_101761401	BBX20	5.38	7.84	6.86	3.52	3.2	3.17	10.75	8.85	6.52	0.68	0.96	1.69
ncbi_101761599	--	3.8	1.68	1.02	3.34	1.65	2.9	2.67	1.48	1.35	3.4	2.81	3.86
ncbi_101761758	Os06g0675700	2.51	4.59	4.05	2.38	2.93	2.74	2.39	2.74	3.16	1.06	1.97	2.06
ncbi_101761862	At2g40090	5.05	4.61	4.36	5.93	6.87	5.94	5.59	4.74	4.46	7.67	6.16	5.77
ncbi_101761958	A6	5.06	7.57	5.5	4.64	7.37	4.73	7.81	10.09	10.54	0.2	0.81	0.89
ncbi_101762006	BIPP2C2	175.42	201.98	200.37	133.99	144.27	169.65	223.42	201.73	200.71	83.24	136.03	162.43
ncbi_101762343	--	324.99	460.23	371.61	270.3	239.21	367.47	301	411.49	355.24	51.85	99.16	121.22
ncbi_101762394	At5g58300	21.92	28.67	31.26	9.08	19.7	26.7	36.12	19.32	17.34	15.89	25.02	18.32
ncbi_101762518	CRPK1	84.53	87.34	90.08	75.96	84.22	95.96	103.96	107.23	103.58	23.92	46.69	42.91
ncbi_101763013	--	165.77	239.03	168.53	123.07	150.19	196.09	236.46	259.41	188.8	107	156.02	109.08
ncbi_101763081	At2g38640	0.62	0.62	0.24	0.75	1.1	0.36	0.19	0	0.42	2.71	0.75	1.95
ncbi_101763186	DTX19	35.55	37.28	35.6	43.17	37.56	36.8	31.89	39.42	38.88	43.65	41.77	40.81
ncbi_101763303	LLG1	0.68	1.05	2.48	0.68	0.41	0.42	1.76	1.87	1.22	0.25	0.18	0.54
ncbi_101763459	F3H-2	13.91	20.15	14.94	13.33	17.24	12.12	30.7	24.23	21.73	5.41	8.9	6.19
ncbi_101763654	SAPK3	44.91	43.68	46.87	30.66	32.54	35.07	57.92	60.43	61.94	26.1	32.77	28.45
ncbi_101763734	FGT1	22.84	22.27	25.76	25.99	24.78	24.83	22.87	19.65	24.97	28.1	28.12	19.27
ncbi_101763857	At1g06690	421.68	427.23	405.32	265.38	360.26	307.97	378.53	390.02	389.43	255.63	312.33	272.67
ncbi_101763963	--	6.83	9.2	13.62	4.77	7.45	11.14	7.99	9.82	9.29	2.65	4.9	4.33
ncbi_101763965	ADC2	15.66	24.84	51.86	7.88	17.35	8.93	18.15	40.73	41.25	9.35	9.96	6.87
ncbi_101764177	MKK5	4.45	3.58	8.65	3.66	5.25	4	4.8	5.79	6.89	3.16	2.88	3.18
ncbi_101764445	DRIP2	23.25	27.6	27.76	18.42	21.82	18.55	21.34	22.6	25.04	14.34	16.5	13.56
ncbi_101764571	--	75.92	127.48	116.33	47.78	78.26	71.05	70.2	125.2	132.59	8.73	28.9	23.47
ncbi_101764712	BACOVA_02659	1.36	1.21	1.18	0.28	0.91	0.78	2.1	1.2	2.12	0.6	0.37	0.86
ncbi_101765062	GATL9	247.32	281.96	362.18	198.16	246.82	343.29	396.27	288.84	225.68	157.61	238.53	209.54
ncbi_101765796	DTX40	136.9	57.13	38.37	170.11	71.95	54.58	107.38	82.72	76.07	132.9	120.93	111.55
ncbi_101765801	ORP2A	4.42	4.65	10.71	3.09	4.3	2.77	6.22	6.66	9.21	2.04	2.28	2
ncbi_101765845	--	42.77	49.5	51.02	30.16	29.35	42.54	52.13	44.08	40.73	10.65	21.01	24.72
ncbi_101765915	ADF7	66.33	69.03	51.31	92.67	74.06	75.49	56.32	81.63	75.68	101.05	97.49	92.2
ncbi_101765933	CESA2	27.63	33.87	32.36	22.28	26.87	27.6	20.23	29.18	37.17	13.13	15.31	15.41
ncbi_101766029	CLC-G	5.68	3.82	6.49	2.93	5.51	4.13	7.82	4.83	5.9	3.22	3	3.27
ncbi_101766030	PER1	1.67	3.95	3.43	3.29	6.34	6.37	3.52	5.33	7.44	2.27	1.83	3.02
ncbi_101766164	PLAT1	93.06	87.5	241.71	58.34	80.5	50.89	213.27	178.7	134.49	58.92	75.53	86.86
ncbi_101766279	GLU10	64.88	97.8	86.6	39.21	54.59	88.63	111.06	101.51	82	16.3	31.61	30.81
ncbi_101766432	SPL13	13.02	18.86	12.52	4	9.36	9.73	7.93	14.58	16.64	2.61	2.85	6.18
ncbi_101766501	--	42.03	55.09	51.36	23.54	32.6	41.32	40.72	46.01	48.63	23.71	40.79	31.08
ncbi_101766534	XAT2	81.36	93.89	96.79	59.34	67.94	74.31	107.18	93.72	88.49	47.22	72.3	70.68
ncbi_101766628	--	57.21	87.8	104.4	49.63	99.47	128.56	118.02	108.18	97.99	48.73	99.18	82.68
ncbi_101766721	At1g11330	1.73	2.19	3.03	1.42	2.48	2.22	2.44	2.27	2.56	0.98	0.99	0.83
ncbi_101766727	MED25	0.84	0.86	1.49	0.91	0.36	0.87	1.06	1.17	1.14	0.62	0.34	0.94
ncbi_101766747	At1g06840	52.84	58.92	42.97	30.3	43.39	39.92	42.2	47.33	54.15	24.4	25.92	37.68
ncbi_101766766	fluG	23.56	17.77	24.01	26.33	24.22	21.48	16.95	21.01	26.12	31.38	32.39	27.64
ncbi_101766831	4CLL2	1.65	1.57	1.79	1.12	1.02	1.25	2.27	1.41	1.56	1.23	0.82	1.24
ncbi_101766883	FD	9.57	10.62	16.36	7.82	10.33	9.34	22.15	18.79	18.71	5.47	10.76	10.21
ncbi_101766893	--	221.84	396.46	467.09	161.77	376.29	574.99	473.98	456.05	423.88	179.33	276.85	281.14
ncbi_101767117	BHLH35	238.37	330.16	369.61	261.4	235.11	281.18	99.98	237.64	243.51	19.46	37.05	50.35
ncbi_101767223	rbm48	5.07	6.37	7.65	4.81	4.64	5.67	8.09	7.98	7.27	4.71	4.38	4.73
ncbi_101767234	JOKA2	124	123.67	151.1	184.77	156.3	145.09	116.54	120.6	126.42	146.89	181.09	168.82
ncbi_101767297	XA21	5.15	4.55	3.78	0.45	3.29	0.56	4.08	5.17	3.67	1.21	1.03	2.05
ncbi_101767345	BHLH112	3.22	2.56	2.37	6.44	6.64	6.85	3.08	3.33	5.44	6.34	4.86	5.99
ncbi_101767441	Os10g0513300	11.04	6.12	7.31	10.04	9.31	6.63	8.65	7.09	6.74	14.18	10.39	9.49
ncbi_101767487	DWF5	50.19	51.39	60.74	46.59	50.6	45.3	47.12	57.63	56.41	34	40.7	43.89
ncbi_101767683	--	270.81	322.48	269.46	210.66	292.66	302.88	377.29	367.87	389.25	82.52	114.76	154.66
ncbi_101767786	BHLH35	220.07	283.75	276.92	132.72	72.72	86.15	146.79	278.17	302.29	24.49	41.34	67.05
ncbi_101768107	At3g12180	9.31	7.13	6.88	8.34	10.31	8.72	9.55	9.28	7.54	11.02	9.63	11.47
ncbi_101768174	GPP1	22.03	16.96	20.63	16.39	21.81	18.84	20.7	22.83	22.51	14.49	15.03	17.24
ncbi_101768287	HAZ1	10.47	10.94	11.16	11.77	13.07	10.42	9.7	9.63	11.69	12.94	13.07	10.45
ncbi_101768327	TET8	1270.92	1841.81	1677.93	1653.88	1806.72	2191.45	2277.57	2173.82	1877.04	626.17	1126.17	1132.13
ncbi_101768456	SPAP32A8.03c	1.64	2.38	3.44	3.88	3.28	4.98	3.18	2.56	1.23	5.53	4.21	5.01
ncbi_101768717	--	0.87	0.09	0.44	0.97	0.58	1.17	1.08	0.27	0.69	1.83	0.91	1.14
ncbi_101769085	At1g52310	27.14	33.66	30.91	29.07	35.43	29.81	32.7	34.75	35.19	26.88	29.18	24.26
ncbi_101769109	GALT1	3.08	1.76	2.85	1.09	1.3	0.99	4.09	3.24	2.16	1.11	1.81	1.45
ncbi_101769120	GDPDL4	12.28	15.61	10.1	12.14	15.34	18.36	11.38	17	17.58	5.21	7.59	7.32
ncbi_101769413	--	2.76	3.92	5.66	2.49	2.99	3.52	4.53	3.78	4.71	2	2.65	3.58
ncbi_101769423	--	0.5	1.46	1.55	0	0.16	0.13	0.22	0.95	1.61	0.48	0.04	0.31
ncbi_101769578	MPK7	125.73	249.58	296.9	149.2	235.31	243.91	272.59	242.82	330.86	58.62	53.44	93.58
ncbi_101769605	RGA5	11	17.68	17.08	7.11	14	16.12	9.59	14.42	11.66	8.57	12.31	5.42
ncbi_101769639	WRKY66	18.31	25.17	20.42	10.24	9.59	13.96	30.48	39.93	26.89	4.08	6.67	7.36
ncbi_101769744	--	24.15	21.19	14.54	36.93	29.1	21.67	12.65	16.13	13.94	38.66	30.93	20.98
ncbi_101769925	XTH30	58.54	63.07	67.14	49.05	49.14	46.33	76.68	87.95	84.41	25.78	39.69	47.84
ncbi_101770169	TOL9	6.7	6.91	10.82	6.94	7.81	7.16	6.15	6.98	10.49	5.58	4.54	6.84
ncbi_101770171	eri2	71.43	72.28	79.17	62.47	70.97	72.73	76.8	72	75.74	62.77	63.82	72.53
ncbi_101770291	--	83.49	190.06	211.21	56	194.83	246.03	149.74	206.64	185.97	75.32	110.72	132.27
ncbi_101770353	ZFP8	1.95	2.58	3.84	1.03	1.92	1.34	1.92	2.77	2.14	0.75	0.7	0.65
ncbi_101770414	--	0.94	1.02	1.31	0.39	0.48	0.78	0.74	1.54	1.25	0.61	0.65	0.54
ncbi_101770571	--	238.02	264.77	289.8	233.04	327.22	319.74	422.95	394.08	317.64	104.66	173.11	185.42
ncbi_101770593	--	37.46	39.06	34.55	42.6	46.92	46.77	33.59	36.9	35.04	50.23	46.41	41.68
ncbi_101770662	RS2	0.16	1.72	4.1	2	2.02	3.08	1.94	2.6	4.55	0.33	0.35	0.77
ncbi_101770742	SEC6	27.98	28.95	29.58	26.82	29.56	28.61	29.54	27.33	30.21	25.76	27.34	25.96
ncbi_101770981	--	0.38	2.03	2.34	0.63	2.09	2.36	1.97	2.66	2.23	0.32	0.35	0.28
ncbi_101771155	BRG3	20.17	42.59	45.69	12.34	25.52	31.52	19.91	37.21	34.79	7.01	22.32	15.63
ncbi_101771161	CPK13	139.73	317.7	326.14	200.02	242.51	227.52	148.81	224.98	235.39	60.25	70.8	84.9
ncbi_101771388	SPS1	2.55	2.11	2.82	1.22	2.42	2.53	2.37	2.93	2.95	1.67	0.99	1.61
ncbi_101771421	--	19.11	9.73	15.43	28.72	20.91	22.6	11.98	11.54	16.56	24.52	26.75	30.5
ncbi_101771535	AHL1	24.87	27.29	41.09	21.44	31.32	30.38	29.77	32.57	39.45	14.55	16.87	19.84
ncbi_101771540	IP5P13	6.06	6.52	6.79	10.36	11.77	11.77	9.38	6.65	8.07	15.78	14.9	13.68
ncbi_101771590	RABA1F	53.91	56.05	59.45	43.24	43.98	47.45	56.61	58.66	51.93	23.71	30.13	32.8
ncbi_101771649	ATG18A	49.06	40.31	38.64	50.74	47.75	46.65	53.82	42.06	37.3	51.3	50.22	48.37
ncbi_101771675	GT43H	20.61	28.39	25.62	12.43	12.11	17.5	15.68	23.79	19.78	5.62	8.53	8.4
ncbi_101771809	--	12.3	6.19	5.4	11.67	7.33	5.77	12.08	7.28	4.84	9.91	11.62	8.52
ncbi_101771874	LPP2	15.82	24.65	20.83	13.23	17.64	21.02	29.17	31.76	27.44	9.36	10.75	11.63
ncbi_101771943	RNP1	36.24	45.26	35.97	26.06	26.27	35.49	33.13	42.33	35.64	20.66	21.03	23.79
ncbi_101772029	YMR102C	26.88	30.36	31.22	20.37	26.35	33.16	28.07	29.59	27.36	20.55	22.82	23.43
ncbi_101772113	WRKY46	1.26	0.78	1.8	0.4	0.2	0.08	1.31	1.19	1.12	0.05	0.09	0.05
ncbi_101772315	--	1.83	1.33	1.45	0.07	0.71	1.18	1	1.78	1.96	0.17	0.43	0.98
ncbi_101772364	--	10.85	9.74	15.75	10.78	14.46	12.88	14.38	13.49	16.39	8.84	9.73	10.24
ncbi_101772638	NAC056	19.09	6.46	6.2	51.2	52.79	35.25	11.88	13.4	6.11	54.15	44.11	62.19
ncbi_101772763	--	0.17	0.18	0	0.28	0.14	0	0.19	0	0	1.04	0.15	0
ncbi_101772865	--	1.11	2.07	1.64	1.02	1.43	2.31	1.17	3.19	2.77	0.2	0.77	0.75
ncbi_101772956	XTH22	35.71	49.84	84.4	22.05	23.75	36.24	60.5	48.52	56.3	17.23	25.83	28.61
ncbi_101773101	--	0	0	0	1.08	0.4	0.93	0	0.1	0.33	1.47	0.33	0.36
ncbi_101773233	CRK10	0.97	3.61	3.2	0.82	1.05	0.86	4.02	3.77	1.74	0.74	0.68	1
ncbi_101773321	TPRP-F1	40.24	101.02	60.77	28.93	63.28	56.92	108.58	111.51	105.52	6.11	18.18	13.21
ncbi_101773634	WRKY57	32.05	38.92	38.61	24.6	35.56	39	35.35	42.85	36.85	12.43	24.01	15.73
ncbi_101773646	SPBC2A9.03	52.68	42.73	44.11	56.04	47.35	51.07	50.83	46.49	50.72	60.77	59.6	63.92
ncbi_101773707	RBOHE	1.08	1.04	1.13	0.49	0.91	1.04	1.09	1.2	1.52	0.24	0.46	0.35
ncbi_101773763	At5g48380	85.02	119.93	106.71	57	84.4	81.28	88.98	108.58	90.14	42.86	57.14	55.01
ncbi_101773801	slr0537	25.81	62.11	53.29	47.53	59.25	58.1	59.25	61.86	67.46	35	31.32	42.13
ncbi_101774082	MGLL	101.29	104.96	119.03	94.31	79.73	89.42	154.39	130.19	132.58	73.2	87.38	86.02
ncbi_101774256	--	197.92	244.89	196.33	189.13	188.29	201.36	240.12	223.81	199.73	89.74	185.28	165.26
ncbi_101774294	PCMP-H26	2.99	2.75	1.64	4.46	3.26	2.86	0.94	2.27	2.65	3.93	3.45	3.58
ncbi_101774753	HDAC1	33.8	25.49	23.81	46.33	40.81	40.97	27.71	28.93	29.72	50.12	48.25	40.53
ncbi_101774808	CCX5	3.54	2.34	3.74	1.48	2.17	2.12	2.26	3	4.24	0.98	2.14	1.44
ncbi_101774869	--	0.93	0.42	0.97	0.71	0	0.25	0.71	1.78	0.48	0	0.24	0.26
ncbi_101775172	At4g16820	114.52	137.87	205.48	86.83	103.25	126.22	224.3	181.22	185.64	65.3	117.94	117.24
ncbi_101775176	GALS1	5.53	9.1	17.54	4.04	5.43	6.8	9.78	13.16	13.77	1.38	1.9	1.59
ncbi_101775178	RDR1	4.11	8.49	7.99	2.11	3.03	2.3	2.56	6.63	7.23	1.74	3.01	2.49
ncbi_101775286	IRL	33.1	28.47	33.69	22.68	45.28	22.01	15.46	17.25	19.82	78.33	52.09	24.04
ncbi_101775452	RGA5	0.88	0.73	1.09	0.68	0.86	0.57	0.57	1.28	1.05	0.39	0.51	0.71
ncbi_101775474	SRT2	41.39	32.9	25.1	55.07	36.39	35.49	28.87	30.93	31.71	72.57	65.39	60.05
ncbi_101775742	--	20.3	5.34	5.54	36.74	11.02	10.73	16.69	14.53	10.9	45.99	36.94	44.35
ncbi_101775857	GATA8	98.3	146.97	144.48	66.03	94.25	136.83	57.87	95.84	98.64	18.59	36.61	35.52
ncbi_101775968	LPXA	3.22	1.94	3.47	2.31	1.97	2.29	3.49	3.32	2.96	2.63	2.15	2.42
ncbi_101776033	4CLL7	2.21	1.8	1.28	0.74	0.99	0.99	2.52	1.52	1.34	0.73	0.75	1.24
ncbi_101776099	RLP47	7.33	7.57	5.37	3.83	5.41	7.39	6.38	7.9	7.57	4.6	5.46	6.51
ncbi_101776370	COBL7	95.22	194.85	233.76	51.4	84.09	138.67	111.98	182.8	201.43	27.21	51.72	44.87
ncbi_101776392	XA21	7.16	18.17	10.68	1.48	10.01	4.66	12.19	11.08	9.49	3.49	7.31	4.28
ncbi_101776394	HCR9-0	1.68	2.71	2.25	0.42	2.28	0.65	1.36	2.73	1.57	0.66	0.29	1.33
ncbi_101776419	DTX49	161.52	187.69	220.3	112.42	114.4	178.99	118.28	162.2	175.72	34.63	58.87	67.97
ncbi_101776575	--	7.89	6.32	5.48	7.15	6.9	7.51	6.23	6.31	6.2	7.34	9.18	8.5
ncbi_101776598	MT1988	10.62	15.07	9.45	2.86	5.16	4.71	6.95	10.27	13.44	1.91	2.28	3.15
ncbi_101776754	SLC35F5	29.28	32.85	36.19	26.32	33.35	26.28	23.88	32.03	32.34	19.32	20.67	20.96
ncbi_101776793	--	4.31	3.93	1.88	1.74	2.09	2.99	4.48	4.64	3.25	2.79	1.45	2.54
ncbi_101776857	WRKY24	428.93	535.6	403.86	338.22	311.66	431.11	483.56	497.46	466.6	208.02	310.11	338.34
ncbi_101776936	BRO1	5.72	7.32	8.82	6.44	6.61	8.2	6.54	7.65	8.51	5.57	7.07	7.05
ncbi_101776952	CYP92C6	3.73	1.9	2.57	2.74	1.79	0.77	4.13	5.37	3.05	0.4	0.51	1.32
ncbi_101777280	DREB1C	119.05	140.75	227.06	76.22	108.06	178.93	132.56	209.3	169.05	55.63	130.55	95.89
ncbi_101777315	CESA1	18.79	23.42	26.41	12.18	15.99	16.51	13.6	23.1	25.37	11.5	13.02	11.32
ncbi_101777383	--	0.94	1.26	1.67	0.85	0.93	0.77	0.84	1.92	1.34	0.48	0.51	0.57
ncbi_101777640	TPS23	1.28	2.71	1.33	1.05	1.31	0.82	2.98	2.97	1.69	0.53	0.44	0.34
ncbi_101777752	--	10.72	8.51	9.8	13.16	13.39	12.76	8.84	10.41	8.58	15.71	12.81	15.35
ncbi_101777975	VIT_06s0061g00120	67.64	144.87	111.78	89.04	78.69	80.16	155.04	177.2	128.55	14.1	34.36	16.01
ncbi_101778031	BIN4	17.38	18.63	20.58	15.3	20.39	19.86	17.82	21.21	20.77	9.81	8.56	10.72
ncbi_101778102	CBP60C	68.77	81.12	88.13	49.21	47.91	55.75	67.08	71.53	65.62	43.1	40.51	39.89
ncbi_101778156	--	1.08	1.38	3.04	2.38	0.84	1.22	2.73	3.06	1.86	1.59	0.98	0.74
ncbi_101778193	Wdr44	19.82	31.39	29.66	12.01	22.4	30.68	9.98	21.22	24.33	4.47	9.24	6.69
ncbi_101778255	R40C1	76.81	82.74	138.09	65.75	66.99	50.96	50.49	91.77	106.17	34.5	52.67	36.5
ncbi_101778334	PER66	32.95	74.91	89.54	17.26	57.2	52.21	51.58	82.18	66.59	19.83	76.82	30.84
ncbi_101778487	MIK2	0.77	0.35	0.53	0.95	1.02	0.78	0.95	0.5	0.53	0.94	0.79	1.12
ncbi_101778520	--	5	5.03	11.03	3.22	3.73	2.39	4.85	6.49	8.34	0.95	0.96	1.38
ncbi_101778575	CRK26	30.94	42.48	29.05	24.7	27.7	25.18	23.22	35.23	35.54	8.01	14.68	13.41
ncbi_101778709	--	0	4.57	2.27	0.21	0.67	0.16	1.27	2.07	2.31	0.38	0.28	0.13
ncbi_101779046	UGT83A1	12.57	10.46	11.4	35.01	32.22	21.69	18.89	13.73	15.26	40.55	40.07	35.91
ncbi_101779131	CAS2	76.79	64.97	75.89	126.72	87.61	90.18	38.24	86.49	81.92	145.21	145.86	111.51
ncbi_101779280	--	1.04	1.51	2.06	0.75	0.92	0.99	0.92	1.36	2.04	0.17	0.18	0.16
ncbi_101779330	--	85.84	101.7	90.42	45.3	72.13	75.58	67.19	99.09	87.49	23.6	40.26	45.22
ncbi_101779345	TIFY11B	610.8	675.7	584.8	645.47	501.04	616.23	702.88	777.81	679.68	257.43	453.75	501.78
ncbi_101779544	Bug22	19.74	16.74	24.12	18.74	23.73	22.21	25.92	21.41	23.54	16.68	19.11	21.2
ncbi_101779547	--	1.41	1.06	1.34	0.29	1.11	0.98	1.19	2.28	1.37	1.09	0.32	0.07
ncbi_101779807	FIP1	33.24	38.48	47.35	40.51	44.39	46.36	44.9	43.74	46.71	21.66	28.12	30.2
ncbi_101779994	XAT3	46.57	54.59	58.56	54.6	50.98	64.52	70.73	69.92	66.7	30.97	44.15	34.59
ncbi_101780030	MTB2	153.8	146.09	129.06	89.49	112.35	112.85	156.34	132.91	97.68	77.76	137.84	134.5
ncbi_101780183	AHL1	2.48	4.1	3.42	2.21	2.21	2.43	2.73	2.71	4.23	1.42	2.42	1.84
ncbi_101780337	WNK1	14.13	5.52	4.7	8.94	8.13	9.49	8.39	5.93	4.35	21	16.93	11.88
ncbi_101780341	PCMP-H92	4.96	3.83	3.82	4.8	4.85	4.71	2.78	3.56	4.23	5.63	5.44	4.85
ncbi_101780472	RF2b	46.6	57.01	59.33	44.73	43.75	51.97	37.73	46.96	48.62	25.19	34.85	31.15
ncbi_101780530	rab3gap1	12.01	12.37	13.28	11.21	13.81	13.53	12.24	13.87	14.05	11.82	9.57	10.41
ncbi_101780783	--	185.83	97.55	103.84	245.42	223.69	238.37	188.05	106.8	129.36	198.24	222.05	289.19
ncbi_101780785	ARF25	3.16	4.7	4.55	1.66	3.49	2.72	2.39	2.52	4.31	1.15	1.53	1.08
ncbi_101780825	XYXT1	0.23	1.32	1.77	0.64	1.12	1.12	0.59	1.59	2.18	0.32	0.33	0.36
ncbi_101780890	CHR24	3.61	4.43	4.82	4.67	4.32	4.99	3.17	3.31	3.68	6.47	5.14	4.34
ncbi_101780953	--	2.84	4.5	5.19	2.21	3.18	2.6	3.59	4.44	5.1	2.76	4.24	2
ncbi_101781059	BGLU7	1.98	5.37	2.78	1.39	1.67	1.9	1.87	3.04	4.56	1.41	1.06	1.5
ncbi_101781119	At3g10130	16.29	12.85	10.7	13.59	15.47	15.06	6.67	11.27	10.58	29.01	23.95	23.49
ncbi_101781153	XTH24	97.7	241.73	372.37	46.85	107.83	108.41	109.56	273.39	298.77	51.4	75.35	67.11
ncbi_101781322	--	33.7	47.98	55.32	34.75	50.98	60.69	39	58.13	50.13	5.82	17.73	17.04
ncbi_101781364	ABCC14	175.76	140.25	131.65	171.16	164.59	171.69	165.96	151.8	135.81	267.74	250.74	213.71
ncbi_101781412	ATJ10	9.01	10.44	10.95	10.65	11.59	10.78	9.96	11.07	12.34	6.52	7.88	7.23
ncbi_101781754	LECRK2	0.63	0.83	0.81	0.45	0.69	1.51	0.75	1.19	1.08	0.11	0.25	0.15
ncbi_101781771	--	10.96	7.84	8.01	9.92	10.12	13.17	11.17	6.46	6.66	14.94	19.61	16.41
ncbi_101781926	RGA5	12.34	15.93	13.84	10.11	16.46	15.84	13.05	17.59	18.79	4.15	7.03	5.23
ncbi_101781973	GXM3	0.94	0.55	0.71	0.45	0.9	0.5	1.06	0.51	0.94	0.41	0.4	0.58
ncbi_101782102	LPP2	15.51	12.24	20.69	10.84	16.56	14.89	24.46	17	18.04	7.38	6.97	12.63
ncbi_101782195	ERF016	3.49	4.32	5.25	4.28	2.96	6.67	4.1	6.79	6.56	0.95	2.17	2.06
ncbi_101782201	PUMP5	799.88	721.58	849.28	332.17	329.26	392.41	808.04	736.45	730.46	279.19	386.03	439.89
ncbi_101782231	At3g50520	2.51	5.07	5.05	2.39	3.67	2.69	1.95	2.87	4.81	1.51	1.65	1.14
ncbi_101782253	SIR	77.29	63.03	56.63	110	119.51	136.68	71.08	83.86	84.06	166.54	129.04	147.27
ncbi_101782469	--	1.81	3.03	4.33	4.32	2.29	4.05	2.69	4.69	5.21	0.22	0.53	0.75
ncbi_101782502	AAE3	819.2	890.07	1042.54	722.19	908.07	1006.85	1007.47	909.81	874.79	680.91	751.92	848.8
ncbi_101782906	-	1.65	0.89	1.19	2.88	2.06	2.57	2.66	1.45	1.53	3.22	3.44	1.93
ncbi_101783010	Tbc1d2	3.74	4.41	4.46	4.19	4.53	4.55	4.18	4.41	5.4	3.41	3.85	3.43
ncbi_101783035	BAG1	27.76	34.15	55.55	26.35	40.47	33.75	40.66	38.17	40.17	7.3	11.24	10.67
ncbi_101783194	CCR3	79.56	126.98	137.67	53.56	68.91	113.67	77.49	90.78	95.12	21.06	62.4	43.11
ncbi_101783444	BSDC1	9.22	6.72	9.18	13.15	12.33	9.63	11.07	8.56	7.52	14.21	11.09	9.73
ncbi_101783764	--	6.38	4.9	4.64	8.4	4.97	6.26	7.84	5.18	4.57	5.87	6.58	6.48
ncbi_101783798	SEC	3.42	5.36	4.94	2.89	3.93	3.35	2.9	5.32	5.02	2.74	3.15	2.41
ncbi_101783981	Os02g0190300	6.92	13.49	10.52	3.21	3.84	2.41	4.75	8.72	8.66	2.52	3.34	4.69
ncbi_101784088	DTX27	187.47	115.09	126.42	192.68	138.07	159.86	172.99	152.03	138.38	186.44	175.05	257.83
ncbi_101784349	VPS37-2	11.92	13.99	12.85	10.49	10.86	12.68	8.71	12.3	12.49	8.41	7.04	8.1
ncbi_101784377	--	16.81	27.87	26.11	10.44	11.42	12.42	19.37	17.58	22.83	3.04	5.57	5.05
ncbi_101784520	PNG1	26.35	24.3	22.25	21.76	23.96	21.81	26.13	25.35	26.04	18.16	18.54	18.44
ncbi_101784553	NAC090	15.54	31.08	17.5	8.04	8.85	21.09	17.69	23.97	14.4	0.94	1.97	4.07
ncbi_101784574	--	0.07	0.49	0.21	0.16	0.38	0.17	0.11	0.11	0.51	0.27	0.24	0.07
ncbi_101784579	At5g01610	84.35	140.32	134.16	64.57	72.76	96.44	110.11	104.5	91.19	42.16	67.95	57.55
ncbi_101784787	dsk1	32.06	40.98	32.64	30.7	31.44	37.6	38.68	36.17	31.46	31.71	33.61	29.23
ncbi_101784792	FREE1	27.27	29.23	27.42	24.29	26.33	23.07	30.56	26.96	25.97	25.9	24.8	22.9
ncbi_101784950	PRA1B2	69.39	91.5	80.3	74.29	73.67	85.19	85.14	96.25	84.03	43.28	60.22	63.02
ncbi_101784977	selO	69.9	71.13	79.21	80.58	87.68	92.11	72.15	67.91	76.01	94.19	85.25	83.73
ncbi_101784996	WRKY50	3.68	4.07	7.68	1.01	0.73	0.85	10.62	7.12	6.4	1.61	1.48	2.62
ncbi_101785018	abhd17c	10.26	6.1	7.21	16.09	14.49	19.05	17.85	12.99	14.39	22.58	23.9	28.76
ncbi_101785110	--	224.61	287.28	345.41	119.44	180.82	259.7	237.64	248.72	246.87	88.89	160.38	133.55
ncbi_101785180	CG5412	1.11	0.89	1.14	0.42	0.92	0.38	0.53	1.38	0.96	0.4	0.55	0.61
ncbi_101785211	TAR2	6.2	8.06	6.94	6.12	6.13	6.69	6.12	7.56	8.76	4.34	7.41	5.07
ncbi_101785322	MDIS2	43.22	47.81	48.04	32.62	35.22	33.89	37.28	49.72	51.33	30.65	46.68	34.89
ncbi_101785512	HOX13	4.37	3.16	3.98	2.32	1.61	1.88	4.13	4.78	5.22	0.83	0.74	1.4
ncbi_101785677	--	259.7	308.27	319.89	284	267.97	322.69	332.18	388.68	344.91	114.92	222.3	192.29
ncbi_101785744	STL2P	11.99	13.41	12.57	10.56	11.75	10.48	12.45	12.93	12.41	9.52	8.19	8.77
ncbi_101785793	LYSMD2	52.41	55.86	50.92	37.75	46.57	53.27	60.19	65.08	69.01	17.55	31.38	27.68
ncbi_101785925	--	4.7	6.46	8.59	2.73	8.06	9	6.43	7.51	6.78	3.16	5.37	6.29
ncbi_101785935	DDB_G0268948	546.07	921.23	728.77	605.58	797.67	630.82	740.2	1017.46	786.59	85.43	169.62	231.19
ncbi_101786223	URED	0.9	0.8	1.27	2	1.24	1.86	1.4	0.91	1.06	1.63	1.95	2
ncbi_101786550	ARF14	2.02	2.43	2.42	1.82	1.61	2.32	2.75	3.03	2.8	1.26	1.31	1.7
ncbi_101786684	MAPKKK17	216.3	225.56	206.07	200.27	186.26	287.88	324.11	268.1	230.79	96.04	156.85	163.63
ncbi_101786837	RABF1	10.46	7.68	12.12	8.68	11.25	10.6	13.21	8.85	12.58	8.17	8.02	9.02
ncbi_101786910	ATL54	16.02	20.25	18.06	13.71	13.01	12.86	21.47	20.14	13.55	10.84	17.94	12.36
ncbi_101786998	LUG	0.3	0.35	0.35	0.2	0.39	0.28	0.17	0.25	0.26	2.01	0.09	0.98
ncbi_101787000	At1g06800	6.87	12.64	12.38	4.1	8.2	10.22	16.56	15.14	9.5	2.03	11.95	4.33
ncbi_105913564	Os03g0610650	0.79	0.91	1.34	0.85	0.64	0.48	0.86	0.99	1.15	0.25	0.77	0.29
ncbi_105914537	XA21	4.05	9.12	8.56	0.4	3.97	1.23	4.78	7.2	7.36	0.43	0.42	1.14
ncbi_105914864	FH16	97.84	155.82	151.84	60.7	69.27	104.73	103.53	131.99	131.44	20.31	36.48	43.35
ncbi_106804316	--	2.8	3.72	5.15	2.28	1.56	2.5	2.52	3.14	3.4	0.29	1.21	0.32
ncbi_111255651	--	47.95	64.15	50.59	37.33	44.66	46.19	42.54	50.85	44.96	26.37	25.58	26.78
ncbi_111255664	--	0.53	0.9	0.88	0	0.05	0.05	0.81	0.98	0.75	0.13	0.26	0.13
ncbi_111256242	--	9.73	5.33	2.1	3.08	6.59	4.37	7.46	9.13	10.27	3.51	1.79	8.19
ncbi_111257456	--	0.51	0.61	1.15	1.3	1.27	0.71	0.4	0.63	0.57	1.68	1.63	0.36
ncbi_19526771	rpoC2	0.73	0.54	0.66	0.88	0.97	0.72	0.65	0.52	0.69	1.12	1	0.52
