# Supplementary material for: Transcriptome-based analysis of key pathways relating to yield formation stage of foxtail millet under different drought stress conditions
Source: Front Plant Sci. 2023 Feb 3;13:1110910. doi: 10.3389/fpls.2022.1110910 (PMC9937063; doi:10.3389/fpls.2022.1110910)
Supplement: Supplementary file 5 [file DataSheet_5.xlsx]

## Sheet: Sheet1
Table S3
GeneID	Enzyme	pathway	Order	LD	LDCK	HD	HDCK
ncbi_101780319	PAL(PTAL)	Phenylpropanoid biosynthesis	1	2.69	1.59	13.493	3.627
ncbi_101781123	ZB8(PTAL)	Phenylpropanoid biosynthesis	2	3.133	4	16.447	1.893
ncbi_101781518	ZB8(PTAL)	Phenylpropanoid biosynthesis	3	10.04	14.547	53.47	6.553
ncbi_101753926	At4g20820(PTAL)	Phenylpropanoid biosynthesis	4	15.853	56.677	8.003	1.95
ncbi_101756300	PAL(PTAL)	Phenylpropanoid biosynthesis	5	2.577	0.39	5.343	2.157
ncbi_101766005	PAL(PTAL)	Phenylpropanoid biosynthesis	6	4.843	2.693	14.81	7.037
ncbi_101764384	4CL5(4CL)	Phenylpropanoid biosynthesis	1	9.877	16.92	13.51	6.153
ncbi_101769729	4CLL1(4CL)	Phenylpropanoid biosynthesis	2	1.95	1.103	3.16	1.21
ncbi_101762300	4CL4(4CL)	Phenylpropanoid biosynthesis	3	19.29	37.717	21.683	5.303
ncbi_101769243	4CL3(4CL)	Phenylpropanoid biosynthesis	4	19.193	48.04	36.37	13.963
ncbi_101755442	CCR1(CRR)	Phenylpropanoid biosynthesis	1	156.07	34.51	35.693	13.487
ncbi_101785020	CCR1(CRR)	Phenylpropanoid biosynthesis	2	45.93	73.313	53.347	25.46
ncbi_101756551	CAD8A(CAD)	Phenylpropanoid biosynthesis	1	0.987	3.38	0.463	0.083
ncbi_101756145	CAD8A(CAD)	Phenylpropanoid biosynthesis	2	43.667	45.597	8.06	1.143
ncbi_101776008	CAD6(CAD)	Phenylpropanoid biosynthesis	3	9.513	2.537	14.757	3.177
ncbi_101780720	ZB8(peroxidase)	Phenylpropanoid biosynthesis	1	84.377	154.65	272.743	55.023
ncbi_101753799	PER2(peroxidase)	Phenylpropanoid biosynthesis	2	0.837	0.033	0.56	0.087
ncbi_101767314	pod(peroxidase)	Phenylpropanoid biosynthesis	3	1.347	0.577	0.653	2.223
ncbi_101756531	GSVIVT00037159001(peroxidase)	Phenylpropanoid biosynthesis	4	0.08	0.357	0.13	0
ncbi_101764555	GSVIVT00037159001(peroxidase)	Phenylpropanoid biosynthesis	5	1.667	4.673	0.77	0.25
ncbi_101779151	PNC1(peroxidase)	Phenylpropanoid biosynthesis	6	0.027	0.023	0.47	0.12
ncbi_101756505	PRX74(peroxidase)	Phenylpropanoid biosynthesis	7	0.023	0.043	0.34	0.053
ncbi_101757113	PER65(peroxidase)	Phenylpropanoid biosynthesis	8	0.35	0.55	1.1	0.423
ncbi_101764825	Sb03g046810(peroxidase)	Phenylpropanoid biosynthesis	9	10.607	31.177	16.253	7.67
ncbi_101753704	PER1(peroxidase)	Phenylpropanoid biosynthesis	10	37.537	25.807	83.813	31.817
ncbi_101761528	PER47(peroxidase)	Phenylpropanoid biosynthesis	11	0.01	0	0.95	0.083
ncbi_101782535	HRPN(peroxidase)	Phenylpropanoid biosynthesis	12	0	0	0.677	0.063
ncbi_101758277	PER52(peroxidase)	Phenylpropanoid biosynthesis	13	0.503	0.113	0.52	0.07
ncbi_101771343	PRX74(peroxidase)	Phenylpropanoid biosynthesis	14	1.303	1.733	1.63	0.287
ncbi_101783171	PER17(peroxidase)	Phenylpropanoid biosynthesis	15	85.447	49.45	47.36	16.35
ncbi_101757149	PRX74(peroxidase)	Phenylpropanoid biosynthesis	16	4.647	3.437	2.363	0.76
ncbi_101766030	PER1(peroxidase)	Phenylpropanoid biosynthesis	17	3.017	5.333	5.43	2.373
ncbi_111255652	Sb03g046810(peroxidase)	Phenylpropanoid biosynthesis	18	5.72	17.697	9.603	4.543
ncbi_101775549	PER2(peroxidase)	Phenylpropanoid biosynthesis	19	0	0	0.817	0.027
ncbi_101777526	PRX112(peroxidase)	Phenylpropanoid biosynthesis	20	2.567	11.377	5.343	1.26
ncbi_101782279	PER52(peroxidase)	Phenylpropanoid biosynthesis	21	2.583	1.953	11.747	4.453
ncbi_101755352	PNC1(peroxidase)	Phenylpropanoid biosynthesis	22	0.143	0.173	1.797	0.2
ncbi_101763346	PER2(peroxidase)	Phenylpropanoid biosynthesis	23	1.383	0.903	18.847	4.523
ncbi_101780647	PER54(peroxidase)	Phenylpropanoid biosynthesis	24	2.943	32.303	4.483	1.787
ncbi_101757192	PER24(peroxidase)	Phenylpropanoid biosynthesis	25	29.99	25.827	20.563	3.48
ncbi_101763748	GSVIVT00037159001(peroxidase)	Phenylpropanoid biosynthesis	26	2.29	2.66	2.007	0.167
ncbi_101771903	PRX74(peroxidase)	Phenylpropanoid biosynthesis	27	68.84	97.943	44.963	11.747
ncbi_101758359	PER51(peroxidase)	Phenylpropanoid biosynthesis	28	9.947	18.217	14.51	3.09
ncbi_101758680	PER52(peroxidase)	Phenylpropanoid biosynthesis	29	0.167	0.01	0.023	0
ncbi_101774991	PER45(peroxidase)	Phenylpropanoid biosynthesis	30	11.817	11.51	6.41	1.173
ncbi_101779481	PER41(peroxidase)	Phenylpropanoid biosynthesis	31	0.75	0.177	0.36	0.09
ncbi_101781049	PER54(peroxidase)	Phenylpropanoid biosynthesis	32	0.643	1.61	1.033	0.507
ncbi_101782429	PER44(peroxidase)	Phenylpropanoid biosynthesis	33	0.87	0.243	0.277	0.177
ncbi_101763208	Sb03g046810(peroxidase)	Phenylpropanoid biosynthesis	34	0.01	0.65	0.073	0
ncbi_101780248	pod(peroxidase)	Phenylpropanoid biosynthesis	35	1.39	12.063	1.233	0.343
ncbi_101784049	AN2(CPS)	Diterpenoid biosynthesis	1	1.857	0.723	10.447	3.407
ncbi_101768451	CPS2CPS)	Diterpenoid biosynthesis	2	40.23	28.583	100.68	18.903
ncbi_101769132	KSL11(CKS)	Diterpenoid biosynthesis	1	20.457	20.763	52.207	16.717
ncbi_101772220	KS1(CKS)	Diterpenoid biosynthesis	2	9.837	17.47	18.487	8.657
ncbi_101770285	CYP701A6(KO)	Diterpenoid biosynthesis	1	4.427	2.573	27.163	11.807
ncbi_101770692	CYP701A6(KO)	Diterpenoid biosynthesis	2	3.777	2.19	35.247	16.16
ncbi_101755044	GA2OX6(GA2OX)	Diterpenoid biosynthesis	1	120.497	95.38	30.293	0.953
ncbi_101766800	GA2OX3(GA2OX)	Diterpenoid biosynthesis	2	2.93	4.21	20.71	3.463
ncbi_101757313	GA2OX5(GA2OX)	Diterpenoid biosynthesis	3	0.153	0.073	0.04	0.617
ncbi_101759758	GA2OX3(GA2OX)	Diterpenoid biosynthesis	4	13.887	32.4	52.753	21.13
ncbi_101773051	GA2OX3(GA2OX)	Diterpenoid biosynthesis	5	19.19	12.96	1.797	0.467
ncbi_101760262	GA20ox1D(GA20OX)	Diterpenoid biosynthesis	1	0.237	0.097	1.9	0.54
ncbi_101765110	AGPL3(glgC)	Starch and sucrose metabolism	1	21.78	3.81	136.647	28.533
ncbi_101755337	AGPS1(glgC)	Starch and sucrose metabolism	2	1.07	0.373	9.47	5.273
ncbi_101761472	SSII-1(glgA)	Starch and sucrose metabolism	1	7.887	2.99	5.41	7.097
ncbi_101765746	BGLU30(β-glucosidase)	Starch and sucrose metabolism	1	0.22	0	0	0.057
ncbi_101775239	BACOVA_02659(bglX)	Starch and sucrose metabolism	2	0.697	0.083	0.377	0.287
ncbi_101770565	BACOVA_02659(bglX)	Starch and sucrose metabolism	3	1.45	0.673	2.33	2.237
ncbi_101776688	BGLU18(bglB)	Starch and sucrose metabolism	4	58.97	23.09	97.837	85.447
ncbi_101777376	BGLU12(β-glucosidase)	Starch and sucrose metabolism	5	14.003	3.12	29.807	7.47
ncbi_101766477	BACOVA_02659(bglX)	Starch and sucrose metabolism	6	2.817	8.79	8.41	4.13
ncbi_101775884	BGLU14(bglB)	Starch and sucrose metabolism	7	2.347	5.11	4.193	2.12
ncbi_101776290	BGLU16(bglB)	Starch and sucrose metabolism	8	49.07	207.423	94.297	58.863
ncbi_101771288	GLU3(endoglucanase)	Starch and sucrose metabolism	1	15.44	5.013	13.303	3.027
ncbi_101762778	At1g32060(PRK)	Carbon fixation in photosynthetic organisms	1	2.567	2.337	8.143	16.757
ncbi_101764636	At1g32060(PRK)	Carbon fixation in photosynthetic organisms	2	124.787	98.21	74.993	1344.22
ncbi_19526795	rbcL(rbcL)	Carbon fixation in photosynthetic organisms	1	22.603	38.067	41.817	1416.22
ncbi_101756247	rbcL(rbcL)	Carbon fixation in photosynthetic organisms	2	1.387	2.463	2.5	45.593
ncbi_101765234	At1g56190(PGK)	Carbon fixation in photosynthetic organisms	1	211.467	124.78	192.603	213.403
ncbi_101785907	pgk(PGK)	Carbon fixation in photosynthetic organisms	2	2.053	1.47	1.82	1.29
ncbi_101754103	PGK1(PGK)	Carbon fixation in photosynthetic organisms	3	1.737	2.023	3.327	142.597
ncbi_101759360	PGK3(PGK)	Carbon fixation in photosynthetic organisms	4	227.383	254.023	467.257	142.597
ncbi_101775268	PGK3(PGK)	Carbon fixation in photosynthetic organisms	5	9.96	8.27	18.577	931.93
ncbi_101752582	GAPB(GAPA)	Carbon fixation in photosynthetic organisms	1	385.803	154.657	444.233	797.75
ncbi_101774537	GAPA(GAPA)	Carbon fixation in photosynthetic organisms	2	630.863	351.49	782.48	427.347
ncbi_101771498	FBA3(ALDO)	Carbon fixation in photosynthetic organisms	1	25.423	22.567	89.27	6.913
ncbi_101786189	FBA5(ALDO)	Carbon fixation in photosynthetic organisms	2	44.717	26.783	59.423	172.347
ncbi_101753410	ALDP(ALDO)	Carbon fixation in photosynthetic organisms	3	0.37	0.083	1.937	9.03
ncbi_101754112	FBA1(ALDO)	Carbon fixation in photosynthetic organisms	4	85.73	105.223	197.593	8.52
ncbi_101756517	FBA1(ALDO)	Carbon fixation in photosynthetic organisms	5	85.73	105.223	197.593	17.083
ncbi_101754815	ALDP(ALDO)	Carbon fixation in photosynthetic organisms	6	696.523	481.93	874.333	118.563
ncbi_101768485	ALDP(ALDO)	Carbon fixation in photosynthetic organisms	7	233.713	96.94	875.09	5.39
ncbi_101755852	CFBP(FBP)	Carbon fixation in photosynthetic organisms	1	283.44	166.91	235.363	343.837
ncbi_101756186	CFBP(FBP)	Carbon fixation in photosynthetic organisms	2	6.417	6.17	7.643	97.717
ncbi_101770545	OsI_10887(FBP)	Carbon fixation in photosynthetic organisms	3	55.043	49.217	64.553	35.33
ncbi_101775263	FBP(FBP)	Carbon fixation in photosynthetic organisms	4	4.173	2.47	5.977	54.667
ncbi_101772761	RPI2(ripA)	Carbon fixation in photosynthetic organisms	1	28.743	53.157	20.36	8.52
ncbi_101777690	RPI4(ripA)	Carbon fixation in photosynthetic organisms	2	8.473	3.78	5.217	17.083
ncbi_101784778	RPI3(ripA)	Carbon fixation in photosynthetic organisms	3	45.11	59.633	98.127	118.563
ncbi_101761721	RPI1(ripA)	Carbon fixation in photosynthetic organisms	4	3.133	4.583	5.99	5.39
ncbi_101775420	P5CS2(P5CS)	Arginine and proline metabolism	1	497.67	12.893	25.827	343.837
ncbi_101765114	P5CS1(P5CS)	Arginine and proline metabolism	2	78.17	33.34	80.187	97.717
ncbi_101764215	PROC(proC)	Arginine and proline metabolism	1	14.32	8.05	21.74	35.33
